# Supplementary material for: Genome-Wide Profiling Reveals Alternative Polyadenylation of Innate Immune-Related mRNA in Patients With COVID-19
Source: Front Immunol. 2021 Oct 27;12:756288. doi: 10.3389/fimmu.2021.756288 (PMC8578971; doi:10.3389/fimmu.2021.756288)
Supplement: Supplementary file 4 [file Table_3.xlsx]

## Sheet: alternative splicing
Supplementary Table 3. The result of AS analysis in COVID-19 and non-COVID-19
ID	GeneID	geneSymbol	chr	strand	exonStart_0base	exonEnd	upstreamES	upstreamEE	downstreamES	downstreamEE	ID	IJC_SAMPLE_1	SJC_SAMPLE_1	IJC_SAMPLE_2	SJC_SAMPLE_2	IncFormLen	SkipFormLen	PValue	FDR	IncLevel1	IncLevel2	IncLevelDifference
214	ENSG00000254413	CHKB-CPT1B	chr22	-	50578548	50578659	50577774	50577934	50579035	50579255	214	34,30,14,11,41,43,19,10,16,14,19,16,20,21,16,13,28,25,24,27,20,16,8,11,21,24,19,17,18,29,12,7,18,21,28,25,14,9,23,16,9,4,2,0,19,9,21,12,18,20,20,21,37,23,26,11,3,1,22,21,20,15,5,8,30,34,13,20,31,46,9,14,3,6,11,7,6,4,21,12,12,13,15,17,14,7,13,13,14,9,6,6,11,8,7,9,8,8,1,1,16,16,7,13,9,12,11,10,27,22,28,41,6,8,28,26,20,29,19,10,22,32,17,25,20,16,20,45,31,29,17,20,11,9,17,24,29,22,21,21,18,10,20,34,3…	3,3,2,3,7,2,2,0,5,1,3,1,2,4,0,2,3,1,5,7,3,3,3,2,1,5,3,3,4,2,5,3,1,1,2,3,2,0,1,5,2,3,3,1,3,4,1,4,5,4,6,5,4,4,1,1,3,4,1,1,1,0,6,2,8,7,4,4,5,3,0,0,0,0,4,0,1,0,0,2,4,4,1,1,1,0,0,2,1,2,3,4,1,2,7,8,4,4,2,3,7,3,2,2,3,5,2,2,3,4,5,6,15,14,7,4,2,5,6,2,9,0,1,2,10,3,6,7,1,1,3,10,3,14,2,4,5,7,1,4,15,10,0,2,7,3,3,5,2,0,1,2,0,9,5,8,5,5,1,1,1,1,2,2,6,3,2,3,5,3,1,5,3,2,6,5,1,2,6,12,19,10,3,6,5,4,4,6,7,5,7,5,4,9,7…	9,8,33,34,7,4,35,48,24,40,24,29,40,38,16,12,43,39,23,39,12,10,12,28,35,33,18,25,40,32,14,8,10,9,37,38,6,0,15,9,14,27,33,37,0,0,2,9,6,4,26,28	8,3,8,12,8,7,15,2,9,6,8,12,7,7,1,2,9,12,2,7,5,3,4,9,7,2,6,1,2,4,3,9,5,4,5,4,9,7,6,6,8,12,1,7,7,4,2,0,6,8,6,3	100	50	5.7881e-05	0.00419871	0.85,0.833,0.778,0.647,0.745,0.915,0.826,1.0,0.615,0.875,0.76,0.889,0.833,0.724,1.0,0.765,0.824,0.926,0.706,0.659,0.769,0.727,0.571,0.733,0.913,0.706,0.76,0.739,0.692,0.879,0.545,0.538,0.9,0.913,0.875,0.806,0.778,1.0,0.92,0.615,0.692,0.4,0.25,0.0,0.76,0.529,0.913,0.6,0.643,0.714,0.625,0.677,0.822,0.742,0.929,0.846,0.333,0.111,0.917,0.913,0.909,1.0,0.294,0.667,0.652,0.708,0.619,0.714,0.756,0.885,1…	0.36,0.571,0.673,0.586,0.304,0.222,0.538,0.923,0.571,0.769,0.6,0.547,0.741,0.731,0.889,0.75,0.705,0.619,0.852,0.736,0.545,0.625,0.6,0.609,0.714,0.892,0.6,0.926,0.909,0.8,0.7,0.308,0.5,0.529,0.787,0.826,0.25,0.0,0.556,0.429,0.467,0.529,0.943,0.725,0.0,0.0,0.333,1.0,0.333,0.2,0.684,0.824	0.115
651	ENSG00000159496	RGL4	chr22	+	23698414	23698548	23698211	23698333	23698843	23699171	651	0,6,7,4,10,2,1,3,23,29,4,2,4,8,20,23,23,14,11,20,1,0,11,10,4,1,14,11,12,20,5,2,0,6,3,6,3,3,12,5,18,14,25,25,13,6,6,7,17,7,5,4,18,20,20,31,10,12,3,4,17,21,2,4,0,5,0,3,7,12,24,19,5,3,2,10,15,2,19,23,12,7,19,19,21,15,7,5,9,6,2,1,11,12,16,10,3,1,10,9,7,7,17,18,3,3,21,16,13,6,2,3,3,2,4,0,3,3,4,5,7,6,19,25,3,3,4,15,17,20,41,35,30,22,3,2,8,5,31,25,3,3,1,1,11,16,26,33,28,32,12,13,11,9,3,3,21,23,2,4,10,3,…	48,73,57,70,145,145,31,37,136,149,77,78,65,60,225,207,94,115,530,526,23,19,118,107,36,44,124,156,95,100,36,45,76,52,88,68,62,52,85,90,173,151,194,202,146,157,94,96,285,296,43,49,180,162,195,191,209,225,112,105,277,268,107,84,77,91,36,47,160,192,113,100,103,94,90,85,299,282,181,186,279,279,148,126,297,314,55,63,59,61,122,129,65,50,416,390,99,97,536,586,94,99,56,69,54,79,288,316,147,123,57,51,114,1…	37,41,6,6,15,12,2,0,6,5,15,18,3,6,14,15,9,10,20,18,28,19,22,15,1,3,33,33,14,11,18,19,37,47,11,16,6,5,2,1,15,19,6,4,4,2,56,48,1,7,19,20	437,424,168,177,511,490,34,30,199,185,230,229,82,71,202,219,218,197,607,619,448,379,223,231,87,70,371,335,183,157,386,381,857,844,311,325,134,155,202,174,310,297,65,64,105,104,1030,966,118,119,259,222	100	50	1.12865e-09	1.65686e-07	0.0,0.039,0.058,0.028,0.033,0.007,0.016,0.039,0.078,0.089,0.025,0.013,0.03,0.062,0.043,0.053,0.109,0.057,0.01,0.019,0.021,0.0,0.045,0.045,0.053,0.011,0.053,0.034,0.059,0.091,0.065,0.022,0.0,0.055,0.017,0.042,0.024,0.028,0.066,0.027,0.049,0.044,0.061,0.058,0.043,0.019,0.031,0.035,0.029,0.012,0.055,0.039,0.048,0.058,0.049,0.075,0.023,0.026,0.013,0.019,0.03,0.038,0.009,0.023,0.0,0.027,0.0,0.031,0.02…	0.041,0.046,0.018,0.017,0.014,0.012,0.029,0.0,0.015,0.013,0.032,0.038,0.018,0.041,0.033,0.033,0.02,0.025,0.016,0.014,0.03,0.024,0.047,0.031,0.006,0.021,0.043,0.047,0.037,0.034,0.023,0.024,0.021,0.027,0.017,0.024,0.022,0.016,0.005,0.003,0.024,0.031,0.044,0.03,0.019,0.01,0.026,0.024,0.004,0.029,0.035,0.043	0.013
831	ENSG00000239998	LILRA2	chr19	+	54573697	54573912	54573027	54573435	54574075	54574111	831	93,109,37,44,52,46,45,40,23,13,19,22,22,21,34,28,43,41,42,53,12,15,33,24,9,11,19,23,38,30,38,22,51,55,39,35,20,16,33,42,20,23,11,7,22,19,26,26,38,36,17,18,32,28,31,22,19,24,9,6,16,13,9,11,64,44,28,25,54,40,24,19,7,6,12,19,15,16,24,19,58,39,14,16,41,27,12,18,21,15,26,14,15,14,24,17,28,21,14,7,28,23,14,9,7,7,19,9,18,20,33,27,21,18,32,24,14,17,22,20,18,14,14,16,39,45,42,45,21,41,31,41,14,17,20,23,26…	7,6,3,2,5,4,2,3,3,2,2,5,4,3,1,3,9,4,2,7,6,0,5,5,3,4,4,2,5,8,4,14,14,6,0,4,6,4,6,3,5,1,0,3,1,4,6,4,3,9,7,5,4,2,4,5,3,4,2,1,3,4,1,1,6,9,0,4,6,2,5,2,2,0,4,2,1,0,3,3,6,6,1,3,3,4,4,3,1,0,3,2,5,1,2,9,3,2,1,0,6,2,0,7,0,2,4,0,1,0,5,6,8,3,3,2,2,1,4,2,4,2,2,1,6,7,5,4,3,4,3,2,3,1,0,3,2,1,0,0,1,2,3,5,5,2,0,3,0,2,5,3,1,1,5,2,8,9,1,3,2,2,1,2,1,2,1,1,2,1,6,7,5,6,2,2,5,3,2,4,1,1,6,6,0,0,1,4,7,4,0,5,2,0,4,2,1,0,5…	69,59,93,83,17,21,72,59,42,41,78,59,28,32,100,106,74,97,50,60,97,92,71,73,73,54,105,91,93,108,91,106,69,74,45,46,13,11,40,24,67,68,83,81,7,2,14,19,28,20,59,60	4,3,3,9,4,2,4,3,3,5,2,5,5,1,13,10,5,3,2,3,8,6,4,6,5,3,4,7,8,5,2,7,4,1,0,0,0,0,0,4,4,3,5,6,0,1,0,0,0,0,6,7	100	50	5.14915e-09	6.90165e-07	0.869,0.901,0.86,0.917,0.839,0.852,0.918,0.87,0.793,0.765,0.826,0.688,0.733,0.778,0.944,0.824,0.705,0.837,0.913,0.791,0.5,1.0,0.767,0.706,0.6,0.579,0.704,0.852,0.792,0.652,0.826,0.44,0.646,0.821,1.0,0.814,0.625,0.667,0.733,0.875,0.667,0.92,1.0,0.538,0.917,0.704,0.684,0.765,0.864,0.667,0.548,0.643,0.8,0.875,0.795,0.688,0.76,0.75,0.692,0.75,0.727,0.619,0.818,0.846,0.842,0.71,1.0,0.758,0.818,0.909,0…	0.896,0.908,0.939,0.822,0.68,0.84,0.9,0.908,0.875,0.804,0.951,0.855,0.737,0.941,0.794,0.841,0.881,0.942,0.926,0.909,0.858,0.885,0.899,0.859,0.88,0.9,0.929,0.867,0.853,0.915,0.958,0.883,0.896,0.974,1.0,1.0,1.0,1.0,1.0,0.75,0.893,0.919,0.892,0.871,1.0,0.5,1.0,1.0,1.0,1.0,0.831,0.811	-0.081
846	ENSG00000170889	RPS9	chr19	+	54206275	54206724	54201486	54201609	54207397	54207644	846	1043,1248,567,568,728,686,907,842,391,351,649,679,727,708,377,388,493,523,1121,1144,694,678,258,275,567,609,309,338,298,303,574,601,749,730,867,806,324,289,406,371,304,240,117,128,248,201,353,314,944,954,290,276,385,426,393,344,730,780,453,434,309,284,937,857,1050,1099,521,476,808,754,333,295,185,167,512,466,924,926,348,326,795,761,269,257,347,364,198,199,237,220,763,799,142,117,757,739,2173,2169…	26,34,13,20,9,2,12,15,11,15,29,23,20,14,12,15,9,17,35,26,17,21,2,3,16,16,5,9,5,4,15,10,33,24,19,26,7,12,12,10,9,5,0,1,9,3,12,9,15,15,5,11,6,11,11,9,19,7,30,25,5,12,25,19,36,25,14,10,20,21,6,4,5,1,16,27,36,30,8,9,18,16,3,8,7,10,5,8,4,10,14,9,1,4,8,8,45,40,35,41,34,26,5,8,3,4,1,2,14,7,26,15,74,57,13,20,28,31,12,12,10,2,8,5,4,10,8,11,25,27,34,26,41,34,6,15,8,9,6,2,22,16,3,10,14,9,5,2,34,46,8,20,9,12…	1.86719e+199	45,34,7,9,82,72,48,40,26,33,26,18,44,26,54,43,27,28,19,12,35,25,10,9,11,22,15,22,15,23,35,37,80,72,13,17,24,28,49,52,47,55,26,25,40,40,28,20,19,19,43,48	100	50	0.000646985	0.0368674	0.953,0.948,0.956,0.934,0.976,0.994,0.974,0.966,0.947,0.921,0.918,0.937,0.948,0.962,0.94,0.928,0.965,0.939,0.941,0.957,0.953,0.942,0.985,0.979,0.947,0.95,0.969,0.949,0.968,0.974,0.95,0.968,0.919,0.938,0.958,0.939,0.959,0.923,0.944,0.949,0.944,0.96,1.0,0.985,0.932,0.971,0.936,0.946,0.969,0.97,0.967,0.926,0.97,0.951,0.947,0.95,0.951,0.982,0.883,0.897,0.969,0.922,0.949,0.958,0.936,0.956,0.949,0.96,0…	0.954,0.965,0.983,0.979,0.912,0.921,0.969,0.974,0.966,0.957,0.965,0.975,0.951,0.964,0.934,0.942,0.968,0.966,0.946,0.968,0.947,0.961,0.967,0.973,0.988,0.976,0.98,0.97,0.973,0.959,0.959,0.955,0.917,0.923,0.966,0.955,0.961,0.955,0.968,0.968,0.973,0.969,0.972,0.973,0.973,0.973,0.969,0.977,0.977,0.978,0.947,0.947	-0.006
999	ENSG00000105483	CARD8	chr19	-	48238382	48238532	48232452	48234543	48240961	48241063	999	99,134,44,50,68,93,155,112,180,154,75,83,70,72,99,102,103,92,95,89,114,105,98,110,104,95,108,96,107,93,114,100,85,87,96,105,123,148,121,160,128,117,79,78,78,106,119,149,78,88,116,100,105,96,114,95,69,61,125,113,86,71,62,60,80,80,134,111,133,150,70,51,63,65,70,63,61,72,68,86,64,64,87,69,45,46,110,110,123,105,74,80,102,78,40,41,48,47,31,37,73,87,48,47,90,106,82,85,115,115,103,109,74,76,118,138,83,7…	23,29,6,13,18,9,17,14,28,29,6,14,15,24,22,26,19,20,5,8,20,12,29,35,9,16,22,25,24,37,13,18,19,23,18,20,40,34,28,16,12,5,12,8,16,14,25,26,24,30,13,13,27,23,20,17,6,4,9,8,13,12,8,3,11,24,37,29,19,23,17,11,8,11,7,5,1,8,17,21,7,0,9,12,12,13,33,24,36,31,8,5,17,19,3,1,3,2,1,3,11,14,9,3,14,11,16,14,19,25,12,21,0,1,15,17,6,9,20,10,5,8,20,14,18,15,19,23,3,4,5,3,3,2,16,11,7,8,15,17,2,4,10,12,35,28,38,35,17,…	62,52,136,147,70,72,79,68,59,85,60,72,76,85,76,80,96,94,89,76,82,61,132,120,80,66,66,56,103,104,69,61,92,103,68,65,65,61,75,57,53,63,87,74,84,87,86,71,51,58,127,123	3,4,31,36,1,4,5,3,10,8,8,3,14,13,18,24,10,12,22,20,5,5,17,24,5,4,5,3,30,10,7,4,7,3,12,11,3,2,0,2,5,0,6,5,0,0,6,5,1,2,22,14	100	50	5.10812e-09	6.87656e-07	0.683,0.698,0.786,0.658,0.654,0.838,0.82,0.8,0.763,0.726,0.862,0.748,0.7,0.6,0.692,0.662,0.73,0.697,0.905,0.848,0.74,0.814,0.628,0.611,0.852,0.748,0.711,0.658,0.69,0.557,0.814,0.735,0.691,0.654,0.727,0.724,0.606,0.685,0.684,0.833,0.842,0.921,0.767,0.83,0.709,0.791,0.704,0.741,0.619,0.595,0.817,0.794,0.66,0.676,0.74,0.736,0.852,0.884,0.874,0.876,0.768,0.747,0.795,0.909,0.784,0.625,0.644,0.657,0.77…	0.912,0.867,0.687,0.671,0.972,0.9,0.888,0.919,0.747,0.842,0.789,0.923,0.731,0.766,0.679,0.625,0.828,0.797,0.669,0.655,0.891,0.859,0.795,0.714,0.889,0.892,0.868,0.903,0.632,0.839,0.831,0.884,0.868,0.945,0.739,0.747,0.915,0.938,1.0,0.934,0.841,1.0,0.879,0.881,1.0,1.0,0.878,0.877,0.962,0.935,0.743,0.815	-0.064
1019	ENSG00000142230	SAE1	chr19	+	47197232	47197377	47169817	47169923	47203670	47203740	1019	52,48,39,41,33,29,66,71,26,27,65,65,70,79,35,29,57,57,76,56,81,111,34,41,82,75,37,43,32,23,101,84,51,39,56,46,74,47,38,31,16,31,27,27,34,20,28,29,74,74,43,43,53,47,35,35,31,21,70,64,52,40,27,35,38,77,43,46,104,97,29,25,14,26,20,21,31,35,47,38,16,26,44,40,13,13,38,25,31,31,35,40,34,40,30,45,16,39,15,28,61,64,17,19,57,46,38,40,19,34,88,69,34,26,67,57,108,106,80,96,69,61,61,64,11,10,49,51,42,49,70,6…	1,3,0,0,1,1,2,2,1,1,2,2,3,3,2,0,2,1,0,5,6,1,0,2,4,2,2,0,5,2,6,5,0,0,4,5,1,5,3,1,0,0,1,0,0,4,1,0,1,3,1,0,5,5,4,1,1,2,5,4,0,2,0,1,3,1,2,0,2,6,2,0,0,0,0,1,1,0,1,1,0,0,0,0,3,1,1,1,2,0,4,1,0,3,1,1,0,0,0,0,0,0,0,1,0,2,2,1,2,3,1,0,0,1,4,0,2,4,2,5,2,1,4,3,1,1,0,3,1,1,2,1,0,1,5,1,0,0,0,0,3,3,7,1,2,2,0,1,0,1,0,1,0,0,2,0,0,1,0,0,0,0,3,1,0,0,0,2,1,1,1,2,2,0,2,2,0,0,0,4,1,4,3,2,2,1,0,0,0,0,1,0,1,1,1,2,2,3,3,9	22,20,30,35,31,11,93,117,39,44,22,19,75,83,45,47,49,65,20,34,68,44,11,20,65,75,36,43,46,42,59,41,49,35,34,31,27,37,38,35,37,42,86,69,33,17,24,17,39,37,40,47	1,0,0,0,0,2,6,10,0,0,5,0,3,0,3,2,2,2,1,1,0,2,0,0,0,1,0,0,0,5,1,1,3,0,2,0,2,3,1,1,0,4,1,3,0,0,1,4,2,4,1,0	100	50	2.22045e-16	6.84519e-14	0.963,0.889,1.0,1.0,0.943,0.935,0.943,0.947,0.929,0.931,0.942,0.942,0.921,0.929,0.897,1.0,0.934,0.966,1.0,0.848,0.871,0.982,1.0,0.911,0.911,0.949,0.902,1.0,0.762,0.852,0.894,0.894,1.0,1.0,0.875,0.821,0.974,0.825,0.864,0.939,1.0,1.0,0.931,1.0,1.0,0.714,0.933,1.0,0.974,0.925,0.956,1.0,0.841,0.825,0.814,0.946,0.939,0.84,0.875,0.889,1.0,0.909,1.0,0.946,0.864,0.975,0.915,1.0,0.963,0.89,0.879,1.0,1.0,1…	0.917,1.0,1.0,1.0,1.0,0.733,0.886,0.854,1.0,1.0,0.688,1.0,0.926,1.0,0.882,0.922,0.925,0.942,0.909,0.944,1.0,0.917,1.0,1.0,1.0,0.974,1.0,1.0,1.0,0.808,0.967,0.953,0.891,1.0,0.895,1.0,0.871,0.86,0.95,0.946,1.0,0.84,0.977,0.92,1.0,1.0,0.923,0.68,0.907,0.822,0.952,1.0	0.007
1106	ENSG00000076928	ARHGEF1	chr19	+	41906456	41906620	41905938	41906025	41906702	41906803	1106	258,234,189,163,285,283,165,182,111,119,250,261,191,203,152,138,256,300,395,373,203,201,218,222,137,117,139,145,178,181,157,170,280,247,297,276,118,108,287,270,200,175,88,70,218,207,299,227,318,316,208,204,272,263,229,208,211,200,177,188,111,105,155,137,309,323,182,176,482,439,179,159,94,96,148,153,129,142,118,144,374,421,209,199,179,175,126,109,141,120,170,158,88,127,268,285,448,452,71,60,212,25…	5,3,3,6,5,10,7,7,2,0,17,14,3,7,0,0,1,1,24,12,10,10,0,0,5,7,2,2,2,4,7,4,8,6,3,2,0,1,4,4,6,8,2,2,1,1,8,9,7,5,3,2,1,0,3,3,10,9,10,6,3,2,9,11,9,5,1,5,9,10,4,2,7,8,6,8,34,19,3,2,13,20,4,1,2,3,3,1,1,0,6,5,1,0,11,10,13,6,1,1,5,3,0,0,2,1,10,12,6,6,20,21,33,16,7,12,37,15,3,4,11,15,2,2,14,7,9,1,8,8,10,3,1,3,5,6,0,1,6,6,23,17,6,8,1,5,0,0,1,0,1,7,1,1,13,6,1,2,2,4,6,1,11,15,6,5,4,1,6,7,3,8,15,15,15,14,1,2,18,…	5.20542e+155	16,25,6,11,7,4,21,20,53,36,13,21,30,36,8,2,11,12,2,3,5,10,10,12,31,42,22,29,9,8,13,10,24,32,6,5,15,12,17,36,39,47,17,19,20,19,5,4,59,44,11,11	100	50	4.44089e-15	1.21154e-12	0.963,0.975,0.969,0.931,0.966,0.934,0.922,0.929,0.965,1.0,0.88,0.903,0.97,0.935,1.0,1.0,0.992,0.993,0.892,0.94,0.91,0.91,1.0,1.0,0.932,0.893,0.972,0.973,0.978,0.958,0.918,0.955,0.946,0.954,0.98,0.986,1.0,0.982,0.973,0.971,0.943,0.916,0.957,0.946,0.991,0.99,0.949,0.927,0.958,0.969,0.972,0.981,0.993,1.0,0.974,0.972,0.913,0.917,0.898,0.94,0.949,0.963,0.896,0.862,0.945,0.97,0.989,0.946,0.964,0.956,0.…	0.942,0.916,0.969,0.941,0.964,0.982,0.944,0.941,0.728,0.798,0.955,0.932,0.864,0.839,0.941,0.986,0.955,0.946,0.984,0.973,0.979,0.958,0.926,0.921,0.898,0.859,0.936,0.916,0.955,0.959,0.953,0.959,0.905,0.884,0.967,0.973,0.926,0.933,0.938,0.883,0.912,0.891,0.931,0.921,0.928,0.923,0.967,0.974,0.857,0.886,0.952,0.956	0.02
1155	ENSG00000130755	GMFG	chr19	-	39329543	39329626	39328358	39329073	39333076	39333126	1155	3212,3510,3128,3107,7142,7075,3029,3112,5027,4960,4586,4314,3272,3144,4732,4750,3653,3914,7041,6835,2853,2836,4264,4256,5489,5240,7185,6941,4906,4922,3781,3544,2955,2889,3939,3902,4293,4159,7700,7591,10687,10312,11047,10745,5376,5279,7089,6882,2670,2702,4929,4789,5590,5469,8234,8263,8745,8626,6039,5699,4981,4964,5556,5364,4541,4266,3491,3334,9058,9072,4873,4712,3089,3044,5446,5325,9783,9682,5427,…	47,57,36,26,121,162,38,48,76,63,72,69,56,53,79,81,84,78,140,149,27,36,108,93,80,95,128,131,92,79,59,60,58,37,92,85,65,84,119,95,111,127,119,145,113,123,116,106,52,39,101,105,144,143,126,149,124,104,82,78,99,83,80,68,68,90,52,48,168,160,69,47,63,63,80,90,152,134,55,75,186,179,130,116,151,155,79,95,122,121,128,100,154,146,181,186,116,127,79,71,95,82,59,57,68,67,92,125,68,68,60,57,165,160,57,59,78,5…	1.45091e+224	209,201,121,137,215,221,104,72,105,110,197,157,53,63,151,120,110,125,159,163,162,166,175,145,85,71,134,128,69,93,158,152,184,157,162,146,133,115,156,150,139,118,75,90,129,134,93,100,109,107,184,192	100	50	6.1719e-06	0.0005256	0.972,0.969,0.978,0.984,0.967,0.956,0.976,0.97,0.971,0.975,0.97,0.969,0.967,0.967,0.968,0.967,0.956,0.962,0.962,0.958,0.981,0.975,0.952,0.958,0.972,0.965,0.966,0.964,0.964,0.969,0.97,0.967,0.962,0.975,0.955,0.958,0.971,0.961,0.97,0.976,0.98,0.976,0.979,0.974,0.96,0.955,0.968,0.97,0.963,0.972,0.961,0.958,0.951,0.95,0.97,0.965,0.972,0.976,0.974,0.973,0.962,0.968,0.972,0.975,0.971,0.96,0.971,0.972,0…	0.972,0.972,0.964,0.959,0.965,0.963,0.965,0.975,0.973,0.971,0.964,0.971,0.973,0.967,0.955,0.964,0.972,0.967,0.962,0.961,0.972,0.971,0.966,0.972,0.969,0.974,0.975,0.975,0.974,0.965,0.965,0.967,0.978,0.981,0.965,0.967,0.969,0.972,0.963,0.964,0.965,0.969,0.974,0.968,0.964,0.963,0.983,0.982,0.971,0.971,0.97,0.969	-0.003
1287	ENSG00000089351	GRAMD1A	chr19	+	35013255	35013368	35011473	35011554	35013540	35013691	1287	60,79,49,40,93,100,40,52,149,127,59,55,52,56,69,77,129,101,90,72,44,39,65,102,52,35,71,95,118,126,53,36,39,57,68,70,44,47,117,89,111,107,49,48,55,74,110,87,76,83,56,59,57,71,64,92,48,59,47,56,64,49,31,25,75,74,57,38,94,98,48,29,22,15,62,43,28,21,64,79,87,96,117,130,93,74,40,49,70,85,59,68,45,61,28,38,17,18,17,10,65,59,50,59,41,47,63,40,124,105,51,42,24,14,65,83,38,45,39,36,56,58,65,81,84,85,95,66…	7,4,8,8,7,9,4,8,6,1,9,9,9,6,11,10,6,5,7,7,7,2,12,9,11,10,22,12,15,12,10,11,6,7,8,8,7,4,11,9,10,16,4,8,8,12,7,5,11,6,6,8,20,8,17,9,1,4,19,11,10,4,34,34,9,7,12,11,11,14,4,6,9,3,10,17,3,1,10,8,5,8,12,9,10,7,6,6,9,16,10,8,22,14,11,9,0,1,1,0,20,18,7,8,11,13,5,4,21,26,7,5,0,2,15,13,8,4,8,5,4,2,4,4,14,10,9,6,5,1,4,4,2,1,3,6,5,6,8,5,3,5,3,9,1,4,11,17,6,3,5,10,10,4,5,7,1,5,8,2,3,12,2,4,3,6,1,3,8,8,13,10,9…	72,48,83,93,43,27,36,40,61,59,71,85,65,41,84,77,86,73,87,107,159,159,144,127,37,35,57,69,73,77,122,115,133,131,166,184,15,13,11,13,42,45,47,43,1,6,46,30,25,12,98,78	3,6,6,8,1,1,1,4,7,6,5,6,6,9,4,9,12,8,6,2,8,11,5,8,3,0,2,6,6,5,5,9,2,5,12,23,1,1,2,4,0,4,14,7,0,0,0,0,2,3,6,7	100	50	5.45131e-11	9.23367e-09	0.811,0.908,0.754,0.714,0.869,0.847,0.833,0.765,0.925,0.984,0.766,0.753,0.743,0.824,0.758,0.794,0.915,0.91,0.865,0.837,0.759,0.907,0.73,0.85,0.703,0.636,0.617,0.798,0.797,0.84,0.726,0.621,0.765,0.803,0.81,0.814,0.759,0.855,0.842,0.832,0.847,0.77,0.86,0.75,0.775,0.755,0.887,0.897,0.776,0.874,0.824,0.787,0.588,0.816,0.653,0.836,0.96,0.881,0.553,0.718,0.762,0.86,0.313,0.269,0.806,0.841,0.704,0.633,0…	0.923,0.8,0.874,0.853,0.956,0.931,0.947,0.833,0.813,0.831,0.877,0.876,0.844,0.695,0.913,0.811,0.782,0.82,0.879,0.964,0.909,0.878,0.935,0.888,0.86,1.0,0.934,0.852,0.859,0.885,0.924,0.865,0.971,0.929,0.874,0.8,0.882,0.867,0.733,0.619,1.0,0.849,0.627,0.754,1.0,1.0,1.0,1.0,0.862,0.667,0.891,0.848	-0.068
1516	ENSG00000123146	ADGRE5	chr19	+	14397076	14397223	14390923	14391079	14397657	14397804	1516	15,11,9,6,7,9,14,10,14,16,8,6,3,5,10,15,20,16,25,25,9,8,8,9,3,4,20,25,25,25,7,4,11,8,10,7,5,6,21,32,7,10,10,5,8,11,15,23,3,6,16,14,26,16,14,17,11,9,9,9,9,13,10,14,13,8,8,12,17,24,5,5,7,1,5,7,8,12,15,15,20,28,16,8,8,13,3,7,16,8,10,16,5,10,9,12,10,13,1,3,9,17,2,5,2,1,18,18,5,11,4,8,3,1,15,8,2,4,6,5,9,5,3,9,16,23,13,15,7,3,3,6,4,5,7,3,12,5,14,16,11,4,15,6,17,15,9,8,35,26,21,21,9,9,12,15,3,4,16,8,8,3…	131,129,117,120,215,220,187,191,192,211,161,187,84,96,299,298,236,254,292,258,91,80,231,199,123,140,287,314,363,340,109,109,151,134,191,211,135,132,389,365,187,188,184,157,134,188,250,227,96,102,274,268,353,372,333,295,164,142,157,177,245,219,135,157,179,138,159,187,350,332,91,99,81,83,155,143,111,93,242,236,231,234,236,260,169,193,114,122,172,192,100,107,142,177,133,136,116,93,20,28,236,263,150,…	3,3,20,12,9,9,8,6,14,8,5,5,6,10,28,29,17,24,10,5,29,14,14,22,10,10,1,3,9,5,9,4,39,18,17,11,1,0,1,0,10,10,3,10,1,0,2,1,0,2,7,14	62,71,211,201,66,48,62,65,140,138,186,168,127,142,105,98,188,199,100,105,258,215,284,317,149,142,115,104,159,153,119,106,194,205,211,208,31,33,32,19,72,99,171,138,6,3,49,47,36,27,119,144	100	50	4.46482e-05	0.00327718	0.054,0.041,0.037,0.024,0.016,0.02,0.036,0.026,0.035,0.037,0.024,0.016,0.018,0.025,0.016,0.025,0.041,0.031,0.041,0.046,0.047,0.048,0.017,0.022,0.012,0.014,0.034,0.038,0.033,0.035,0.031,0.018,0.035,0.029,0.026,0.016,0.018,0.022,0.026,0.042,0.018,0.026,0.026,0.016,0.029,0.028,0.029,0.048,0.015,0.029,0.028,0.025,0.036,0.021,0.021,0.028,0.032,0.031,0.028,0.025,0.018,0.029,0.036,0.043,0.035,0.028,0.02…	0.024,0.021,0.045,0.029,0.064,0.086,0.061,0.044,0.048,0.028,0.013,0.015,0.023,0.034,0.118,0.129,0.043,0.057,0.048,0.023,0.053,0.032,0.024,0.034,0.032,0.034,0.004,0.014,0.028,0.016,0.036,0.019,0.091,0.042,0.039,0.026,0.016,0.0,0.015,0.0,0.065,0.048,0.009,0.035,0.077,0.0,0.02,0.011,0.0,0.036,0.029,0.046	-0.007
1830	ENSG00000118046	STK11	chr19	+	1216267	1216398	1206815	1207203	1218416	1218500	1830	5,7,0,1,1,3,4,5,2,2,10,1,9,4,4,2,9,1,4,3,7,12,6,3,7,8,3,2,3,2,8,7,3,4,13,15,8,8,6,2,2,6,1,2,6,1,8,4,5,5,1,5,1,3,2,2,2,3,7,8,6,3,3,2,5,9,7,3,12,10,7,5,5,1,2,6,4,6,3,4,6,8,5,3,4,6,6,1,4,3,1,4,4,2,3,5,8,3,4,7,6,3,0,1,3,4,5,8,7,0,11,5,3,5,5,17,4,2,4,9,5,3,5,9,0,6,2,4,6,8,2,3,4,7,6,6,6,9,1,2,5,5,3,5,0,4,2,3,1,10,6,5,4,2,11,2,2,0,7,7,2,2,5,4,4,1,8,2,9,8,1,3,10,4,4,3,3,3,13,7,12,15,1,6,5,5,0,1,5,6,1,2,4…	36,46,34,20,22,14,38,50,19,13,37,34,42,36,14,22,21,17,24,35,39,33,30,37,33,44,25,19,20,15,30,44,32,24,44,45,42,38,26,27,24,18,11,10,21,15,15,26,32,30,19,30,25,32,14,17,25,28,25,17,22,16,10,13,36,34,26,24,59,41,27,28,26,13,17,21,32,23,16,19,31,28,20,28,12,16,44,32,13,7,22,31,27,27,26,24,47,40,29,29,27,36,19,9,13,26,19,15,17,21,35,45,51,34,40,30,47,39,32,30,27,32,19,21,12,15,32,40,47,40,36,38,45,35…	3,5,3,6,8,4,23,22,6,5,7,6,8,12,9,3,12,12,5,3,5,0,3,6,8,4,2,9,2,3,6,0,12,7,8,13,8,3,7,3,8,0,8,4,2,1,2,3,3,3,4,4	33,24,42,51,35,29,81,71,49,58,34,40,45,45,31,28,55,39,15,23,35,26,21,22,35,58,49,45,28,25,47,43,38,28,34,40,29,29,36,39,51,36,47,55,17,22,34,30,39,27,37,52	100	50	0.000337689	0.0204927	0.065,0.071,0.0,0.024,0.022,0.097,0.05,0.048,0.05,0.071,0.119,0.014,0.097,0.053,0.125,0.043,0.176,0.029,0.077,0.041,0.082,0.154,0.091,0.039,0.096,0.083,0.057,0.05,0.07,0.062,0.118,0.074,0.045,0.077,0.129,0.143,0.087,0.095,0.103,0.036,0.04,0.143,0.043,0.091,0.125,0.032,0.211,0.071,0.072,0.077,0.026,0.077,0.02,0.045,0.067,0.056,0.038,0.051,0.123,0.19,0.12,0.086,0.13,0.071,0.065,0.117,0.119,0.059,0.…	0.043,0.094,0.034,0.056,0.103,0.065,0.124,0.134,0.058,0.041,0.093,0.07,0.082,0.118,0.127,0.051,0.098,0.133,0.143,0.061,0.067,0.0,0.067,0.12,0.103,0.033,0.02,0.091,0.034,0.057,0.06,0.0,0.136,0.111,0.105,0.14,0.121,0.049,0.089,0.037,0.073,0.0,0.078,0.035,0.056,0.022,0.029,0.048,0.037,0.053,0.051,0.037	0.008
1992	ENSG00000100330	MTMR3	chr22	+	30023456	30023483	30022608	30022697	30025629	30026037	1992	29,28,23,19,36,50,27,24,23,31,21,24,15,16,30,38,44,42,47,38,10,15,27,31,13,16,63,60,43,32,21,22,19,15,30,29,28,23,48,47,52,65,26,15,23,19,54,65,18,20,21,34,29,27,50,34,33,37,46,31,28,28,66,74,20,20,28,23,41,40,14,20,14,13,23,16,28,23,36,46,52,57,9,12,35,33,28,20,32,28,23,23,23,28,19,30,23,20,5,3,37,30,14,9,16,11,53,54,41,37,41,37,11,7,19,22,18,16,15,14,31,39,25,22,52,43,28,30,7,12,22,18,10,12,29,…	59,59,30,22,50,66,30,28,27,34,22,26,45,40,62,78,77,87,55,51,22,27,64,68,26,29,60,67,93,73,32,30,37,42,40,47,41,35,65,56,63,64,44,36,56,40,72,40,34,33,59,44,38,30,57,49,34,44,27,21,33,25,39,38,35,47,26,22,100,73,24,42,18,25,28,31,37,26,77,63,74,60,38,39,54,56,47,44,34,42,26,30,59,60,33,26,20,26,9,11,49,46,26,30,31,22,33,36,36,50,32,38,14,15,28,24,18,22,36,33,47,44,50,45,63,78,64,83,21,20,38,38,39,…	38,35,41,45,35,25,13,14,29,36,49,31,25,26,33,32,35,26,35,44,26,31,54,56,22,28,30,29,47,25,44,40,27,28,45,59,22,17,42,23,33,46,37,14,10,5,27,22,19,17,38,35	31,23,43,61,22,28,14,18,19,33,49,57,17,22,46,33,37,32,39,52,46,57,40,57,32,27,29,38,51,42,44,50,56,63,65,51,16,21,32,26,36,19,13,31,15,17,22,22,23,16,51,47	77	50	2.92273e-07	3.07515e-05	0.242,0.236,0.332,0.359,0.319,0.33,0.369,0.358,0.356,0.372,0.383,0.375,0.178,0.206,0.239,0.24,0.271,0.239,0.357,0.326,0.228,0.265,0.215,0.228,0.245,0.264,0.405,0.368,0.231,0.222,0.299,0.323,0.25,0.188,0.328,0.286,0.307,0.299,0.324,0.353,0.349,0.397,0.277,0.213,0.211,0.236,0.328,0.513,0.256,0.282,0.188,0.334,0.331,0.369,0.363,0.311,0.387,0.353,0.525,0.489,0.355,0.421,0.524,0.558,0.271,0.216,0.412,…	0.443,0.497,0.382,0.324,0.508,0.367,0.376,0.336,0.498,0.415,0.394,0.261,0.488,0.434,0.318,0.386,0.381,0.345,0.368,0.355,0.268,0.261,0.467,0.389,0.309,0.402,0.402,0.331,0.374,0.279,0.394,0.342,0.238,0.224,0.31,0.429,0.472,0.345,0.46,0.365,0.373,0.611,0.649,0.227,0.302,0.16,0.443,0.394,0.349,0.408,0.326,0.326	-0.067
2106	ENSG00000101084	RAB5IF	chr20	+	36607889	36608000	36607714	36607818	36609600	36609730	2106	59,64,45,46,79,78,67,77,128,114,66,63,57,58,54,68,82,92,89,106,54,50,93,82,92,72,152,170,76,80,70,58,44,48,66,63,79,68,73,90,111,99,133,149,98,110,89,84,63,70,117,90,100,95,137,112,128,112,127,93,103,112,283,298,48,61,60,49,156,133,86,82,44,44,76,98,134,125,92,96,159,176,57,62,148,137,93,115,72,78,105,97,75,110,100,123,77,89,40,41,76,81,48,52,60,45,153,117,94,87,63,60,56,53,62,51,79,83,70,75,113,…	252,260,147,132,342,343,164,183,478,445,192,210,191,163,302,319,220,267,286,276,129,124,269,235,281,321,301,233,234,200,236,246,167,170,202,214,224,261,238,254,326,317,339,303,303,283,257,252,231,225,274,299,308,289,354,350,331,295,249,252,281,289,173,213,271,266,209,224,466,447,280,297,112,116,261,243,282,277,295,275,320,311,253,283,453,427,292,267,406,378,331,272,493,470,302,266,227,242,169,154…	132,159,134,93,129,153,99,73,98,100,50,63,38,50,54,79,102,89,141,136,95,87,95,119,56,76,65,79,59,57,116,106,148,114,113,118,78,79,70,85,133,134,113,93,51,38,173,155,63,50,138,106	5.83588e+155	100	50	1.23947e-10	2.01107e-08	0.105,0.11,0.133,0.148,0.104,0.102,0.17,0.174,0.118,0.114,0.147,0.13,0.13,0.151,0.082,0.096,0.157,0.147,0.135,0.161,0.173,0.168,0.147,0.149,0.141,0.101,0.202,0.267,0.14,0.167,0.129,0.105,0.116,0.124,0.14,0.128,0.15,0.115,0.133,0.151,0.145,0.135,0.164,0.197,0.139,0.163,0.148,0.143,0.12,0.135,0.176,0.131,0.14,0.141,0.162,0.138,0.162,0.16,0.203,0.156,0.155,0.162,0.45,0.412,0.081,0.103,0.126,0.099,0.…	0.102,0.119,0.149,0.108,0.119,0.138,0.15,0.115,0.136,0.147,0.065,0.086,0.091,0.133,0.067,0.098,0.118,0.101,0.124,0.108,0.091,0.091,0.089,0.12,0.112,0.156,0.073,0.083,0.084,0.086,0.106,0.095,0.156,0.134,0.125,0.143,0.124,0.136,0.114,0.136,0.143,0.149,0.163,0.141,0.139,0.099,0.152,0.146,0.159,0.111,0.123,0.09	0.019
2193	ENSG00000101294	HM13	chr20	+	31568077	31568224	31566209	31566295	31569119	31569326	2193	7,11,1,3,6,5,2,3,4,2,7,5,2,1,3,2,1,3,6,3,3,2,1,0,1,1,1,4,2,2,2,1,2,3,8,3,3,2,4,5,1,5,4,0,1,2,0,3,0,4,2,3,2,1,1,0,3,5,3,3,6,0,6,4,2,3,3,1,7,6,2,5,1,0,2,4,9,8,1,1,2,3,3,2,1,0,0,0,0,0,4,2,1,0,5,2,11,13,2,3,3,2,1,1,1,0,5,9,3,0,9,1,9,4,4,2,1,1,3,3,3,3,0,4,2,0,0,1,10,6,4,11,6,6,3,3,2,1,6,2,5,7,4,3,2,3,2,2,9,6,5,5,4,4,5,3,0,4,3,3,1,2,6,7,1,5,3,2,5,7,1,2,1,0,2,1,1,1,7,7,8,7,2,9,2,3,2,2,8,6,5,3,7,2,2,0,2,…	67,89,44,43,42,34,43,46,55,57,57,77,64,70,39,41,69,55,88,99,42,36,38,43,57,50,20,19,28,22,79,72,54,67,77,58,53,64,47,67,20,22,38,34,40,35,29,52,84,96,34,40,35,56,26,26,65,47,51,40,31,34,30,30,72,63,39,38,120,101,39,48,13,22,46,41,56,47,30,27,34,38,58,43,26,31,32,34,36,29,54,52,41,43,62,58,102,107,36,43,109,120,32,33,27,24,48,53,42,28,53,72,181,176,41,45,77,73,67,61,50,64,41,36,28,33,50,57,103,106…	4,1,2,1,2,8,10,10,5,7,7,10,1,1,11,3,5,10,8,6,8,5,3,3,2,6,4,6,2,11,3,8,7,10,7,3,0,1,9,11,23,21,8,6,4,9,7,6,8,2,3,4	62,62,52,36,81,102,130,126,46,51,88,91,56,59,82,82,114,103,97,92,112,120,38,37,76,102,136,135,55,67,85,107,145,134,53,43,85,81,144,158,126,122,82,85,112,125,56,42,103,105,68,54	100	50	8.76678e-07	8.60708e-05	0.05,0.058,0.011,0.034,0.067,0.068,0.023,0.032,0.035,0.017,0.058,0.031,0.015,0.007,0.037,0.024,0.007,0.027,0.033,0.015,0.034,0.027,0.013,0.0,0.009,0.01,0.024,0.095,0.034,0.043,0.012,0.007,0.018,0.022,0.049,0.025,0.028,0.015,0.041,0.036,0.024,0.102,0.05,0.0,0.012,0.028,0.0,0.028,0.0,0.02,0.029,0.036,0.028,0.009,0.019,0.0,0.023,0.051,0.029,0.036,0.088,0.0,0.091,0.062,0.014,0.023,0.037,0.013,0.028,0…	0.031,0.008,0.019,0.014,0.012,0.038,0.037,0.038,0.052,0.064,0.038,0.052,0.009,0.008,0.063,0.018,0.021,0.046,0.04,0.032,0.034,0.02,0.038,0.039,0.013,0.029,0.014,0.022,0.018,0.076,0.017,0.036,0.024,0.036,0.062,0.034,0.0,0.006,0.03,0.034,0.084,0.079,0.047,0.034,0.018,0.035,0.059,0.067,0.037,0.009,0.022,0.036	-0.005
2489	ENSG00000265681	RPL17	chr18	-	49491735	49491833	49491531	49491584	49492457	49492508	2489	49,45,37,32,33,33,118,141,58,64,69,69,90,91,46,52,91,103,53,53,95,103,89,107,116,92,52,47,60,57,112,96,58,52,60,68,74,60,32,44,67,65,37,58,41,30,39,23,89,61,36,29,84,80,38,37,35,44,92,118,45,45,93,106,74,74,53,74,100,101,49,42,24,16,29,24,40,32,33,37,26,35,44,55,53,32,65,66,54,59,84,79,116,99,45,40,40,31,24,24,132,119,25,24,54,46,39,42,46,46,135,114,23,34,107,94,119,106,112,92,86,75,131,118,51,48…	1290,1376,1198,1108,595,634,2779,2722,997,983,1911,1869,2525,2615,1105,1064,1093,1237,1443,1423,3219,3167,1096,1141,2996,2942,836,848,896,850,3058,2892,1569,1487,1752,1651,1943,1955,959,878,788,803,951,954,835,765,853,823,2461,2585,1142,1058,1038,1046,761,738,928,857,2420,2249,950,897,2048,2072,1581,1565,1332,1440,2001,1994,1023,944,617,583,780,742,1282,1199,1089,1128,866,832,1324,1218,587,606,11…	42,42,52,53,43,35,150,110,85,80,54,60,113,109,27,43,90,88,34,47,54,57,39,32,89,79,69,64,67,87,75,58,51,43,55,51,75,75,142,119,68,70,123,132,47,46,53,68,135,118,96,88	1.32814e+205	100	50	5.55112e-16	1.64548e-13	0.019,0.016,0.015,0.014,0.027,0.025,0.021,0.025,0.028,0.032,0.018,0.018,0.018,0.017,0.02,0.024,0.04,0.04,0.018,0.018,0.015,0.016,0.039,0.045,0.019,0.015,0.03,0.027,0.032,0.032,0.018,0.016,0.018,0.017,0.017,0.02,0.019,0.015,0.016,0.024,0.041,0.039,0.019,0.03,0.024,0.019,0.022,0.014,0.018,0.012,0.016,0.014,0.039,0.037,0.024,0.024,0.019,0.025,0.019,0.026,0.023,0.024,0.022,0.025,0.023,0.023,0.02,0.02…	0.016,0.015,0.019,0.021,0.017,0.014,0.017,0.013,0.016,0.015,0.018,0.018,0.014,0.014,0.007,0.011,0.016,0.016,0.014,0.02,0.016,0.018,0.027,0.022,0.014,0.013,0.016,0.017,0.019,0.025,0.02,0.016,0.015,0.013,0.02,0.019,0.015,0.016,0.024,0.021,0.016,0.017,0.017,0.019,0.01,0.01,0.019,0.025,0.028,0.024,0.019,0.018	0.004
2727	ENSG00000175354	PTPN2	chr18	-	12793481	12793574	12785480	12785844	12794383	12794485	2727	2,8,2,5,6,2,6,1,6,2,5,6,4,4,1,2,2,2,5,2,7,7,3,4,4,6,2,4,3,1,8,7,3,2,4,1,4,1,0,3,6,0,1,4,2,0,4,4,3,2,8,2,6,11,6,7,10,9,7,6,3,3,6,8,5,5,2,3,4,8,0,1,1,3,0,5,5,3,0,7,6,7,4,5,2,7,1,3,9,7,5,11,4,6,5,8,3,13,1,2,11,3,0,3,4,3,12,4,3,4,7,6,8,4,11,5,14,5,9,7,7,1,0,5,3,4,2,3,13,12,2,2,0,4,5,4,8,4,9,2,4,6,12,5,4,2,8,8,14,17,8,8,8,10,2,2,3,3,1,6,7,2,3,2,0,2,9,5,5,4,7,9,4,2,3,0,2,0,18,8,6,8,7,6,2,2,1,0,1,5,5,5,…	63,71,37,34,31,51,63,50,62,83,48,47,59,40,31,29,31,30,37,43,63,59,37,56,68,78,39,28,38,20,71,79,37,38,49,45,58,60,21,30,65,80,44,44,34,40,35,34,59,61,37,42,54,48,62,63,65,66,71,74,48,56,49,39,58,41,46,42,58,57,54,38,36,21,48,46,52,49,35,40,52,59,49,63,39,19,39,44,43,38,70,54,43,38,52,33,46,27,24,18,90,94,30,25,59,50,55,47,52,43,71,88,38,24,51,54,75,104,72,61,79,75,58,44,30,25,76,38,50,62,41,43,35…	6,3,7,11,14,12,16,17,10,24,4,8,3,8,14,10,7,9,11,17,3,3,4,2,9,9,5,8,8,6,7,10,7,5,8,13,4,8,14,4,6,8,4,3,4,0,9,10,4,2,7,6	96,72,71,64,58,67,135,88,54,76,62,54,78,69,79,70,74,60,66,68,72,55,37,61,77,55,68,77,80,68,76,112,98,106,87,78,78,52,68,54,62,66,88,68,44,32,51,38,65,67,75,70	100	50	4.14082e-05	0.0030539	0.016,0.053,0.026,0.068,0.088,0.019,0.045,0.01,0.046,0.012,0.05,0.06,0.033,0.048,0.016,0.033,0.031,0.032,0.063,0.023,0.053,0.056,0.039,0.034,0.029,0.037,0.025,0.067,0.038,0.024,0.053,0.042,0.039,0.026,0.039,0.011,0.033,0.008,0.0,0.048,0.044,0.0,0.011,0.043,0.029,0.0,0.054,0.056,0.025,0.016,0.098,0.023,0.053,0.103,0.046,0.053,0.071,0.064,0.047,0.039,0.03,0.026,0.058,0.093,0.041,0.057,0.021,0.034,0…	0.03,0.02,0.047,0.079,0.108,0.082,0.056,0.088,0.085,0.136,0.031,0.069,0.019,0.055,0.081,0.067,0.045,0.07,0.077,0.111,0.02,0.027,0.051,0.016,0.055,0.076,0.035,0.049,0.048,0.042,0.044,0.043,0.034,0.023,0.044,0.077,0.025,0.071,0.093,0.036,0.046,0.057,0.022,0.022,0.043,0.0,0.081,0.116,0.03,0.015,0.045,0.041	-0.009
2800	ENSG00000101608	MYL12A	chr18	+	3249360	3249443	3247812	3247909	3253232	3253428	2800	36,58,22,18,33,41,24,20,57,74,20,14,16,35,16,25,22,27,51,59,36,23,16,29,44,37,52,55,45,53,34,29,18,19,30,36,28,25,45,40,50,45,54,48,28,30,33,33,14,17,25,35,46,46,27,41,20,21,25,23,44,50,62,56,29,14,27,13,61,67,20,34,5,16,32,35,67,64,38,33,65,58,26,32,40,29,29,35,70,68,20,32,43,34,34,25,4,5,7,4,35,11,26,14,38,29,43,48,46,38,26,35,9,5,20,15,18,22,28,34,50,37,24,37,26,13,50,38,39,37,22,14,7,5,14,20,…	1589,1770,624,643,1793,1766,894,820,1567,1489,846,769,1097,1024,1359,1370,1277,1343,1495,1453,1095,1199,1283,1234,1132,1121,1505,1588,1412,1397,1248,1268,801,839,981,983,1082,1100,1307,1310,1638,1627,1958,1832,1093,1086,1108,1091,1037,1019,793,770,1530,1562,1351,1165,825,764,1266,1098,1494,1485,952,935,1289,1214,666,638,1894,1869,1124,1002,570,578,785,807,980,899,1570,1504,1272,1355,1165,1267,944…	13,10,23,24,9,6,15,8,14,27,16,15,25,22,64,42,15,25,24,20,26,24,18,18,12,11,20,19,42,51,16,22,28,49,27,35,2,11,4,4,17,22,24,20,3,0,21,16,4,3,22,22	8.64824e+178	100	50	1.56166e-06	0.000147677	0.011,0.016,0.017,0.014,0.009,0.011,0.013,0.012,0.018,0.024,0.012,0.009,0.007,0.017,0.006,0.009,0.009,0.01,0.017,0.02,0.016,0.01,0.006,0.012,0.019,0.016,0.017,0.017,0.016,0.019,0.013,0.011,0.011,0.011,0.015,0.018,0.013,0.011,0.017,0.015,0.015,0.014,0.014,0.013,0.013,0.014,0.015,0.015,0.007,0.008,0.016,0.022,0.015,0.015,0.01,0.017,0.012,0.014,0.01,0.01,0.015,0.017,0.032,0.029,0.011,0.006,0.02,0.01…	0.007,0.006,0.013,0.013,0.008,0.005,0.007,0.004,0.01,0.018,0.01,0.009,0.013,0.012,0.026,0.016,0.007,0.012,0.007,0.006,0.01,0.01,0.007,0.007,0.006,0.006,0.008,0.008,0.016,0.019,0.007,0.01,0.009,0.017,0.013,0.017,0.003,0.015,0.006,0.006,0.013,0.018,0.015,0.013,0.009,0.0,0.011,0.009,0.006,0.005,0.01,0.01	0.002
2823	ENSG00000076944	STXBP2	chr19	+	7643164	7643245	7642982	7643048	7644613	7644752	2823	465,549,315,330,452,503,310,353,368,332,379,398,262,264,363,394,410,447,639,637,193,194,353,372,282,297,451,412,422,480,334,289,315,283,497,506,301,317,445,477,386,415,292,285,455,416,434,474,532,530,318,301,483,453,460,425,556,495,383,353,380,371,402,371,521,525,311,304,821,741,372,398,221,205,317,301,497,511,363,385,827,863,491,478,629,601,350,327,404,374,496,456,424,403,743,663,1091,1070,220,2…	4,2,0,0,1,1,0,0,1,2,5,2,3,7,2,1,0,2,4,2,0,1,2,1,1,3,4,0,3,2,1,2,4,5,4,2,3,1,4,4,0,0,0,0,5,1,3,3,1,3,6,2,0,0,1,2,0,1,1,5,1,0,1,3,2,4,4,2,3,6,2,0,0,1,1,2,2,1,2,4,2,2,0,3,3,4,2,1,1,0,0,1,3,3,3,3,3,6,0,0,8,5,0,0,2,2,0,0,1,3,5,2,16,10,4,2,1,0,1,2,1,2,0,2,7,2,4,0,2,2,1,2,7,2,0,1,1,8,0,2,0,3,2,0,3,2,2,1,1,0,2,3,2,3,0,1,4,4,2,0,2,7,4,1,0,4,5,2,2,2,1,2,1,1,0,2,3,5,3,0,8,3,2,1,2,4,5,10,6,7,7,6,3,3,2,1,1,0,…	8.70902e+168	0,0,120,129,129,107,6,2,4,3,4,4,3,0,2,3,2,2,5,6,1,5,1,1,2,1,1,1,2,4,3,6,7,5,1,0,7,2,4,4,2,0,2,5,6,3,10,6,4,6,0,1	100	50	0	0	0.983,0.993,1.0,1.0,0.996,0.996,1.0,1.0,0.995,0.988,0.974,0.99,0.978,0.95,0.989,0.995,1.0,0.991,0.988,0.994,1.0,0.99,0.989,0.995,0.993,0.98,0.983,1.0,0.986,0.992,0.994,0.986,0.975,0.966,0.984,0.992,0.98,0.994,0.982,0.984,1.0,1.0,1.0,1.0,0.978,0.995,0.986,0.988,0.996,0.989,0.964,0.987,1.0,1.0,0.996,0.991,1.0,0.996,0.995,0.972,0.995,1.0,0.995,0.984,0.992,0.985,0.975,0.987,0.993,0.984,0.989,1.0,1.0,…	1.0,1.0,0.74,0.72,0.796,0.817,0.99,0.996,0.989,0.992,0.993,0.993,0.985,1.0,0.994,0.99,0.995,0.995,0.99,0.988,0.998,0.989,0.997,0.997,0.994,0.997,0.998,0.998,0.993,0.986,0.995,0.989,0.986,0.991,0.997,1.0,0.983,0.995,0.991,0.991,0.997,1.0,0.993,0.985,0.982,0.991,0.986,0.991,0.989,0.983,1.0,0.998	0.015
3195	ENSG00000271605	MILR1	chr17	+	64457399	64457684	64452596	64452866	64460821	64460932	3195	92,89,28,40,34,46,42,44,10,14,27,23,40,40,36,41,39,38,32,52,40,46,43,42,73,79,66,85,21,27,59,49,28,20,44,47,71,60,14,7,39,59,31,33,85,80,17,22,42,43,16,25,80,64,16,15,13,14,55,46,32,40,61,73,41,38,52,43,104,117,28,34,25,23,11,15,25,22,38,34,82,69,70,61,26,21,85,83,34,36,32,48,40,34,26,21,8,18,8,4,48,57,28,30,28,26,59,54,15,17,62,67,10,13,33,34,21,19,77,71,35,37,80,55,23,27,107,95,59,49,9,15,9,14,…	4,5,2,0,4,6,2,2,0,0,3,1,0,2,2,2,1,1,1,1,6,3,3,1,6,5,6,2,1,1,1,6,0,1,4,5,10,3,3,0,6,7,1,2,3,2,5,4,1,8,1,2,4,3,2,4,2,0,1,3,3,1,6,3,0,5,2,2,12,10,1,3,2,2,1,0,2,2,0,0,5,8,5,4,1,2,1,6,3,5,4,3,0,0,1,1,1,1,2,1,1,4,6,0,0,0,6,9,2,4,7,3,3,2,1,2,0,4,3,3,2,3,9,11,1,0,3,4,7,5,2,0,2,0,1,2,12,6,4,3,3,8,16,15,1,2,2,5,5,9,4,3,3,6,0,1,3,2,0,2,1,1,5,3,0,2,2,0,2,3,2,0,1,2,0,2,2,3,2,5,1,1,1,6,0,0,7,4,0,2,0,1,11,11,9,…	32,29,68,45,31,40,82,83,43,35,28,25,32,24,108,107,51,40,218,245,82,74,60,79,19,10,35,24,88,83,51,54,61,53,32,42,30,30,16,17,29,31,28,28,10,2,30,33,28,17,51,55	6,1,4,2,2,4,9,7,4,4,4,0,0,1,6,11,8,3,24,18,5,10,1,6,5,2,1,6,6,5,1,10,53,59,2,4,1,1,1,2,5,1,0,1,1,2,3,5,0,2,6,2	100	50	0.000312648	0.0191617	0.92,0.899,0.875,1.0,0.81,0.793,0.913,0.917,1.0,1.0,0.818,0.92,1.0,0.909,0.9,0.911,0.951,0.95,0.941,0.963,0.769,0.885,0.878,0.955,0.859,0.888,0.846,0.955,0.913,0.931,0.967,0.803,1.0,0.909,0.846,0.825,0.78,0.909,0.7,1.0,0.765,0.808,0.939,0.892,0.934,0.952,0.63,0.733,0.955,0.729,0.889,0.862,0.909,0.914,0.8,0.652,0.765,1.0,0.965,0.885,0.842,0.952,0.836,0.924,1.0,0.792,0.929,0.915,0.812,0.854,0.933,0…	0.727,0.935,0.895,0.918,0.886,0.833,0.82,0.856,0.843,0.814,0.778,1.0,1.0,0.923,0.9,0.829,0.761,0.87,0.82,0.872,0.891,0.787,0.968,0.868,0.655,0.714,0.946,0.667,0.88,0.892,0.962,0.73,0.365,0.31,0.889,0.84,0.938,0.938,0.889,0.81,0.744,0.939,1.0,0.933,0.833,0.333,0.833,0.767,1.0,0.81,0.81,0.932	0.044
3274	ENSG00000062716	VMP1	chr17	+	59738836	59738947	59735337	59735473	59764970	59765068	3274	306,321,313,286,367,351,374,352,231,241,320,336,199,210,483,533,381,407,530,491,207,190,517,428,256,276,734,672,712,594,345,386,295,310,418,378,472,515,1118,1126,908,889,797,831,491,497,733,734,224,247,606,586,521,446,705,786,401,390,387,452,253,265,357,323,224,266,449,459,794,824,254,315,196,223,395,373,315,266,596,548,627,569,306,279,395,372,469,459,569,574,225,224,489,521,199,183,46,60,49,50,3…	3,3,2,0,3,5,1,1,4,3,1,5,2,1,4,2,4,12,6,1,1,2,9,6,5,1,18,11,7,5,0,5,0,0,4,8,4,3,10,12,17,22,15,15,4,10,9,15,0,2,17,13,4,9,18,8,7,5,4,13,2,3,22,9,3,2,5,4,16,8,3,3,2,1,3,7,2,3,7,11,13,10,3,4,6,3,6,3,6,5,4,10,2,2,2,3,0,0,0,0,5,5,5,2,7,0,3,4,4,1,0,2,0,0,3,3,4,2,2,4,5,4,5,4,2,0,7,8,1,1,3,10,2,0,1,1,5,1,3,0,1,1,0,1,5,2,4,5,1,1,16,10,4,3,1,3,7,4,0,4,6,2,0,1,0,3,3,5,2,2,6,6,7,3,1,3,5,6,5,1,2,3,4,5,0,0,7,4…	297,254,519,496,86,86,63,76,259,293,374,378,176,169,369,351,350,382,196,181,340,324,763,731,258,248,345,340,329,298,292,278,296,316,361,373,50,53,75,53,85,92,306,278,7,7,26,33,37,39,436,482	5,1,2,4,0,1,0,0,4,8,4,4,2,4,6,2,3,2,2,0,3,5,8,4,3,2,3,4,5,6,2,0,7,5,7,5,0,1,1,2,1,0,0,2,0,0,0,1,0,0,1,3	100	50	2.31443e-05	0.00175305	0.981,0.982,0.987,1.0,0.984,0.972,0.995,0.994,0.967,0.976,0.994,0.971,0.98,0.991,0.984,0.993,0.979,0.944,0.978,0.996,0.99,0.979,0.966,0.973,0.962,0.993,0.953,0.968,0.981,0.983,1.0,0.975,1.0,1.0,0.981,0.959,0.983,0.988,0.982,0.979,0.964,0.953,0.964,0.965,0.984,0.961,0.976,0.961,1.0,0.984,0.947,0.958,0.985,0.961,0.951,0.98,0.966,0.975,0.98,0.946,0.984,0.978,0.89,0.947,0.974,0.985,0.978,0.983,0.961,…	0.967,0.992,0.992,0.984,1.0,0.977,1.0,1.0,0.97,0.948,0.979,0.979,0.978,0.955,0.969,0.989,0.983,0.99,0.98,1.0,0.983,0.97,0.979,0.989,0.977,0.984,0.983,0.977,0.971,0.961,0.986,1.0,0.955,0.969,0.963,0.974,1.0,0.964,0.974,0.93,0.977,1.0,1.0,0.986,1.0,1.0,1.0,0.943,1.0,1.0,0.995,0.988	-0.005
3307	ENSG00000213246	SUPT4H1	chr17	-	58347528	58347584	58347187	58347241	58351401	58351508	3307	508,511,354,334,609,590,581,471,663,671,535,523,421,432,505,477,446,503,701,748,439,422,530,506,678,711,579,634,521,491,603,550,426,418,478,518,566,622,570,520,664,632,714,664,570,562,546,540,534,507,517,554,612,585,614,614,470,502,437,435,480,470,486,472,547,530,421,370,1062,984,530,520,290,266,530,474,526,527,489,481,537,528,546,496,606,495,516,451,720,689,483,543,610,581,444,438,506,485,267,25…	14,13,9,8,4,13,12,7,9,9,14,6,10,3,6,5,3,8,13,17,3,8,7,5,13,20,6,12,6,3,7,9,9,10,8,4,6,9,5,10,6,17,8,14,12,14,7,5,10,6,8,20,8,16,7,15,6,7,6,12,9,14,13,17,12,15,9,9,23,18,9,6,2,6,15,4,6,10,10,7,6,23,6,11,17,22,14,22,16,16,10,7,7,11,7,5,3,17,3,2,11,18,6,8,10,12,9,9,9,12,4,12,3,7,6,3,2,9,7,9,8,16,7,8,9,6,14,18,12,7,9,3,7,3,7,6,7,8,5,2,4,5,8,12,6,12,9,6,11,5,10,13,16,9,4,6,16,9,4,5,12,7,12,11,3,4,6,10…	6.96708e+155	4,6,11,7,9,3,7,5,9,6,6,4,7,12,7,11,9,9,7,2,12,10,7,8,6,3,14,16,7,7,9,14,11,9,7,11,7,7,9,8,5,6,8,3,8,1,3,1,7,8,13,13	100	50	0.000349519	0.0210449	0.948,0.952,0.952,0.954,0.987,0.958,0.96,0.971,0.974,0.974,0.95,0.978,0.955,0.986,0.977,0.979,0.987,0.969,0.964,0.957,0.987,0.963,0.974,0.981,0.963,0.947,0.98,0.964,0.977,0.988,0.977,0.968,0.959,0.954,0.968,0.985,0.979,0.972,0.983,0.963,0.982,0.949,0.978,0.96,0.96,0.953,0.975,0.982,0.964,0.977,0.97,0.933,0.975,0.948,0.978,0.953,0.975,0.973,0.973,0.948,0.964,0.944,0.949,0.933,0.958,0.946,0.959,0.9…	0.989,0.983,0.967,0.977,0.959,0.987,0.976,0.983,0.97,0.979,0.978,0.984,0.97,0.948,0.98,0.968,0.975,0.974,0.98,0.994,0.96,0.964,0.976,0.973,0.975,0.988,0.957,0.949,0.972,0.973,0.976,0.959,0.963,0.967,0.978,0.966,0.965,0.969,0.958,0.962,0.978,0.975,0.97,0.989,0.942,0.993,0.985,0.995,0.968,0.96,0.963,0.964	-0.007
3354	ENSG00000011052	NME1-NME2	chr17	+	51154224	51154444	51153635	51153662	51155650	51155780	3354	1,2,7,1,1,1,4,0,2,1,3,3,12,8,1,1,12,13,4,4,9,6,6,1,9,5,2,7,0,2,11,13,13,7,3,4,3,3,8,4,3,3,6,1,4,3,3,0,2,4,6,4,3,2,2,6,1,1,2,4,6,4,0,5,5,4,0,1,17,22,2,2,0,0,2,0,6,2,8,6,7,2,10,3,0,1,1,0,1,1,2,0,6,4,2,4,2,5,1,0,7,7,1,0,6,1,4,0,4,2,3,4,5,7,1,3,9,3,15,9,2,2,3,5,1,0,4,3,4,5,24,26,4,3,4,2,3,1,1,5,1,0,5,0,8,7,2,1,2,2,1,1,2,1,1,0,3,0,2,0,3,4,0,1,0,0,9,9,0,2,0,0,8,12,3,5,0,3,20,16,8,7,8,5,1,2,1,3,7,6,2,4,…	20,15,23,32,18,20,22,20,24,24,51,41,77,69,14,16,86,84,37,28,67,80,37,24,71,61,51,36,18,12,70,64,55,30,36,45,29,27,19,27,15,24,14,16,17,14,19,12,36,29,22,21,36,30,19,23,17,17,38,35,50,41,20,22,83,64,20,22,125,94,32,29,3,5,31,22,49,55,55,64,37,23,34,44,10,5,21,16,17,13,19,19,35,26,31,32,36,18,21,20,39,34,2,5,25,17,15,22,23,26,47,49,47,58,19,25,47,47,60,62,15,26,39,35,12,9,27,21,23,22,152,150,49,42,…	0,2,0,0,3,0,5,9,0,0,2,2,2,4,2,3,1,1,2,1,5,5,2,1,1,1,0,0,1,4,3,3,2,3,0,0,1,2,1,2,3,5,4,6,3,1,1,0,1,0,1,0	8,11,15,14,23,16,55,44,17,10,13,15,21,14,44,50,27,20,8,9,26,28,2,10,26,26,14,13,16,18,12,18,25,38,9,8,29,19,26,35,12,12,25,26,25,21,15,12,14,16,12,19	100	50	7.93099e-06	0.000668023	0.024,0.062,0.132,0.015,0.027,0.024,0.083,0.0,0.04,0.02,0.029,0.035,0.072,0.055,0.034,0.03,0.065,0.072,0.051,0.067,0.063,0.036,0.075,0.02,0.06,0.039,0.019,0.089,0.0,0.077,0.073,0.092,0.106,0.104,0.04,0.043,0.049,0.053,0.174,0.069,0.091,0.059,0.176,0.03,0.105,0.097,0.073,0.0,0.027,0.065,0.12,0.087,0.04,0.032,0.05,0.115,0.029,0.029,0.026,0.054,0.057,0.047,0.0,0.102,0.029,0.03,0.0,0.022,0.064,0.105,…	0.0,0.083,0.0,0.0,0.061,0.0,0.043,0.093,0.0,0.0,0.071,0.062,0.045,0.125,0.022,0.029,0.018,0.024,0.111,0.053,0.088,0.082,0.333,0.048,0.019,0.019,0.0,0.0,0.03,0.1,0.111,0.077,0.038,0.038,0.0,0.0,0.017,0.05,0.019,0.028,0.111,0.172,0.074,0.103,0.057,0.023,0.032,0.0,0.034,0.0,0.04,0.0	0.003
3400	ENSG00000002919	SNX11	chr17	+	48110707	48110767	48107557	48107838	48112030	48112085	3400	15,19,3,6,28,16,6,8,12,7,9,16,6,7,10,6,1,0,8,5,7,3,12,13,3,5,22,18,4,7,16,16,16,18,9,16,23,18,9,11,24,16,11,19,6,8,20,14,9,11,6,5,9,13,2,4,11,11,4,7,18,14,7,5,1,1,6,12,21,24,2,5,6,3,5,7,3,8,11,8,2,6,7,7,11,22,8,4,10,11,8,6,13,16,9,2,2,1,5,1,11,8,8,3,16,12,13,14,10,6,14,8,1,0,10,9,4,7,6,2,5,4,14,14,17,18,1,2,2,2,1,2,0,0,15,14,12,17,8,12,8,4,5,14,13,10,6,10,22,17,19,7,14,16,6,9,11,8,13,7,4,8,15,6,3…	54,91,40,26,52,63,32,39,62,59,39,36,52,53,48,51,30,46,47,46,27,26,58,39,57,62,43,46,47,48,52,74,33,35,47,48,67,62,61,59,73,67,65,72,52,56,45,63,30,22,28,37,56,43,58,61,30,41,37,34,40,55,9,9,24,37,45,40,77,75,38,38,40,19,44,40,36,23,63,65,28,34,38,46,32,36,34,33,55,55,31,21,50,42,18,23,7,8,7,15,35,43,26,25,53,43,53,48,40,55,33,48,5,4,31,44,15,18,56,40,35,44,79,60,70,44,64,69,32,20,25,21,5,4,34,26,…	11,5,11,6,6,6,7,4,11,9,7,12,6,20,11,11,15,19,20,19,7,10,27,22,9,7,6,10,7,12,5,12,12,9,4,1,4,2,6,2,7,8,10,11,2,0,2,4,2,2,8,8	20,31,36,35,10,20,14,16,35,30,47,49,19,28,26,34,50,47,54,55,40,39,56,64,23,28,38,38,42,51,29,28,55,29,26,35,2,9,5,8,15,15,25,25,1,3,14,23,9,8,30,47	100	50	0.000298619	0.0184117	0.122,0.095,0.036,0.103,0.212,0.113,0.086,0.093,0.088,0.056,0.103,0.182,0.055,0.062,0.094,0.056,0.016,0.0,0.078,0.052,0.115,0.055,0.094,0.143,0.026,0.039,0.204,0.164,0.041,0.068,0.133,0.098,0.195,0.205,0.087,0.143,0.146,0.127,0.069,0.085,0.141,0.107,0.078,0.117,0.055,0.067,0.182,0.1,0.13,0.2,0.097,0.063,0.074,0.131,0.017,0.032,0.155,0.118,0.051,0.093,0.184,0.113,0.28,0.217,0.02,0.013,0.062,0.13,0…	0.216,0.075,0.133,0.079,0.231,0.13,0.2,0.111,0.136,0.13,0.069,0.109,0.136,0.263,0.175,0.139,0.13,0.168,0.156,0.147,0.08,0.114,0.194,0.147,0.164,0.111,0.073,0.116,0.077,0.105,0.079,0.176,0.098,0.134,0.071,0.014,0.5,0.1,0.375,0.111,0.189,0.211,0.167,0.18,0.5,0.0,0.067,0.08,0.1,0.111,0.118,0.078	-0.046
3546	ENSG00000126581	BECN1	chr17	-	42811654	42811797	42810133	42810928	42813947	42814008	3546	114,133,86,74,110,104,102,97,92,94,112,92,102,119,130,117,74,111,125,115,109,128,89,86,128,117,125,133,114,87,135,125,107,106,114,99,143,136,147,111,169,168,87,93,115,114,118,136,145,134,112,87,99,107,108,110,95,91,123,117,99,92,34,38,109,91,101,109,172,197,102,81,46,52,71,49,80,74,103,100,109,105,129,119,69,62,108,90,109,89,68,69,107,93,36,37,28,37,18,29,139,122,32,36,122,124,106,124,63,76,114,1…	5,4,3,9,1,0,8,4,0,0,5,6,4,5,0,0,2,1,2,6,9,7,2,2,10,4,3,2,0,1,8,5,4,3,5,5,8,6,6,11,4,4,1,2,3,2,7,6,4,1,3,0,4,4,5,5,5,8,5,5,7,5,6,2,2,1,0,4,12,6,6,4,8,1,4,0,6,2,3,4,9,9,4,1,1,1,4,2,6,3,2,2,2,3,3,3,0,1,0,2,3,5,0,0,2,1,5,7,2,6,8,5,0,0,1,6,5,6,6,2,3,4,3,1,1,1,5,3,3,2,4,2,1,2,6,2,2,1,1,1,0,1,4,4,1,1,2,4,4,5,3,1,2,8,1,1,1,0,1,1,1,3,4,4,3,0,0,3,4,2,1,4,4,2,0,1,1,2,4,3,1,7,5,3,0,0,0,1,0,2,4,2,6,1,3,3,4,7,…	88,85,152,141,75,76,131,118,141,150,107,105,159,128,170,163,204,167,125,164,152,143,150,154,130,120,138,123,148,133,115,132,103,93,132,125,58,48,31,36,45,54,151,173,9,10,41,57,43,42,121,146	3,4,0,1,2,0,5,6,9,5,3,4,4,2,4,4,5,3,1,1,5,0,1,1,3,2,4,5,3,0,2,7,0,3,1,1,3,2,1,0,1,0,5,2,0,0,1,1,0,3,2,5	100	50	2.65896e-11	4.76573e-09	0.919,0.943,0.935,0.804,0.982,1.0,0.864,0.924,1.0,1.0,0.918,0.885,0.927,0.922,1.0,1.0,0.949,0.982,0.969,0.906,0.858,0.901,0.957,0.956,0.865,0.936,0.954,0.971,1.0,0.978,0.894,0.926,0.93,0.946,0.919,0.908,0.899,0.919,0.925,0.835,0.955,0.955,0.978,0.959,0.95,0.966,0.894,0.919,0.948,0.985,0.949,1.0,0.925,0.93,0.915,0.917,0.905,0.85,0.925,0.921,0.876,0.902,0.739,0.905,0.965,0.978,1.0,0.932,0.878,0.943…	0.936,0.914,1.0,0.986,0.949,1.0,0.929,0.908,0.887,0.938,0.947,0.929,0.952,0.97,0.955,0.953,0.953,0.965,0.984,0.988,0.938,1.0,0.987,0.987,0.956,0.968,0.945,0.925,0.961,1.0,0.966,0.904,1.0,0.939,0.985,0.984,0.906,0.923,0.939,1.0,0.957,1.0,0.938,0.977,1.0,1.0,0.953,0.966,1.0,0.875,0.968,0.936	-0.019
3601	ENSG00000173812	EIF1	chr17	+	41689777	41689941	41688884	41689069	41690087	41690189	3601	762,765,736,732,825,906,1140,1257,982,903,1073,1037,770,774,888,857,498,594,1309,1246,974,920,885,908,1163,1178,556,586,528,562,1127,1128,930,872,1142,1102,1216,1098,964,952,841,753,940,902,691,700,956,878,1141,1150,757,804,861,846,1022,1004,1016,1091,1323,1430,622,665,2637,2525,896,895,1133,1070,1635,1707,757,807,483,471,805,839,1020,1002,491,488,881,937,1145,1137,1055,1006,929,858,1394,1365,115…	9,13,16,11,9,3,27,20,22,20,20,24,4,7,10,14,5,6,21,20,20,9,11,11,26,30,5,13,11,14,18,23,12,13,19,17,12,18,24,12,7,16,9,10,15,9,17,14,9,11,14,7,17,24,25,18,12,7,28,22,9,7,116,105,8,12,31,39,33,22,9,8,8,10,11,10,8,10,5,5,6,10,13,7,16,12,13,10,30,53,19,17,23,20,19,15,14,14,7,2,13,11,5,9,5,12,17,13,42,46,8,7,7,18,21,18,22,30,6,8,13,9,7,8,8,7,10,10,6,6,7,4,11,6,4,6,7,7,7,7,9,5,4,4,4,10,8,9,14,10,8,10,1…	2.02119e+198	14,9,10,17,14,15,10,11,15,14,8,15,8,18,16,17,14,11,3,2,11,16,18,10,13,8,12,18,16,13,18,19,10,9,8,4,13,16,13,25,17,11,20,40,9,10,13,7,14,18,17,16	100	50	2.75335e-13	6.01988e-11	0.977,0.967,0.958,0.971,0.979,0.993,0.955,0.969,0.957,0.958,0.964,0.956,0.99,0.982,0.978,0.968,0.98,0.98,0.969,0.969,0.961,0.981,0.976,0.976,0.957,0.952,0.982,0.958,0.96,0.953,0.969,0.961,0.975,0.971,0.968,0.97,0.981,0.968,0.953,0.975,0.984,0.959,0.981,0.978,0.958,0.975,0.966,0.969,0.984,0.981,0.964,0.983,0.962,0.946,0.953,0.965,0.977,0.987,0.959,0.97,0.972,0.979,0.919,0.923,0.982,0.974,0.948,0.9…	0.986,0.991,0.98,0.967,0.976,0.972,0.991,0.99,0.979,0.981,0.989,0.978,0.985,0.97,0.976,0.972,0.981,0.985,0.993,0.995,0.986,0.978,0.96,0.977,0.983,0.99,0.986,0.978,0.97,0.974,0.976,0.974,0.985,0.986,0.984,0.991,0.982,0.976,0.983,0.967,0.978,0.984,0.974,0.946,0.987,0.985,0.975,0.986,0.981,0.975,0.977,0.977	-0.006
3771	ENSG00000126860	EVI2A	chr17	-	31320372	31320513	31317559	31319023	31321494	31321749	3771	26,28,11,7,21,24,9,23,30,36,11,10,20,24,13,16,15,18,6,11,23,15,22,20,32,31,14,15,16,24,24,15,19,20,24,26,26,25,31,30,23,31,17,17,20,14,23,12,5,10,24,21,18,7,18,17,8,10,6,12,8,15,3,4,22,19,8,10,33,34,11,10,14,4,21,17,4,2,25,11,12,5,9,19,9,2,23,21,38,32,7,9,28,24,1,1,2,9,0,1,25,20,5,8,13,20,10,19,8,23,8,14,2,0,22,17,6,4,20,19,9,16,11,15,23,15,28,20,6,15,2,6,1,1,8,17,22,28,15,13,6,6,47,20,7,15,25,24…	440,444,155,162,327,321,236,250,471,510,199,157,236,263,268,264,220,238,188,189,202,210,357,357,380,315,377,330,223,212,308,306,237,216,376,377,359,424,415,423,448,379,337,311,257,265,328,315,208,191,294,287,224,254,233,232,116,146,200,145,139,139,95,77,226,233,241,261,483,413,186,200,185,138,180,195,103,93,275,297,143,127,166,183,192,150,306,320,339,353,158,133,293,288,44,43,15,32,18,22,218,197,…	10,7,19,14,2,3,2,3,11,9,24,4,11,15,20,16,12,14,26,10,17,12,21,29,8,1,14,7,19,34,15,6,9,1,19,18,8,8,3,2,2,6,10,20,0,0,3,1,2,3,20,15	161,143,317,290,61,66,88,89,236,229,259,235,208,198,408,376,284,275,245,262,225,237,337,342,201,162,198,197,550,519,212,211,191,222,195,189,45,38,39,30,67,61,222,216,16,8,33,43,26,25,305,334	100	50	1.31002e-05	0.0010517	0.029,0.031,0.034,0.021,0.031,0.036,0.019,0.044,0.031,0.034,0.027,0.031,0.041,0.044,0.024,0.029,0.033,0.036,0.016,0.028,0.054,0.034,0.03,0.027,0.04,0.047,0.018,0.022,0.035,0.054,0.037,0.024,0.039,0.044,0.031,0.033,0.035,0.029,0.036,0.034,0.025,0.039,0.025,0.027,0.037,0.026,0.034,0.019,0.012,0.026,0.039,0.035,0.039,0.014,0.037,0.035,0.033,0.033,0.015,0.04,0.028,0.051,0.016,0.025,0.046,0.039,0.016,…	0.03,0.024,0.029,0.024,0.016,0.022,0.011,0.017,0.023,0.019,0.044,0.008,0.026,0.036,0.024,0.021,0.021,0.025,0.05,0.019,0.036,0.025,0.03,0.041,0.02,0.003,0.034,0.017,0.017,0.032,0.034,0.014,0.023,0.002,0.046,0.045,0.082,0.095,0.037,0.032,0.015,0.047,0.022,0.044,0.0,0.0,0.043,0.011,0.037,0.057,0.032,0.022	0.005
3815	ENSG00000132589	FLOT2	chr17	-	28884224	28884315	28882978	28883231	28888944	28889026	3815	334,371,267,229,566,535,221,245,714,746,315,351,226,242,473,438,513,518,598,568,170,178,474,481,270,245,539,551,605,616,239,253,293,332,397,373,217,233,525,484,680,660,310,278,661,618,542,500,493,403,377,413,462,481,653,572,357,371,459,456,388,413,155,125,320,267,271,306,711,691,275,261,221,225,561,491,333,310,550,523,920,970,623,655,622,580,285,314,556,549,421,444,372,406,444,415,178,143,129,132…	21,17,11,9,25,25,17,15,11,21,28,21,6,3,9,11,24,24,27,33,13,8,17,9,14,9,39,30,15,25,20,21,16,9,21,18,6,7,23,28,27,41,12,11,31,21,36,25,16,13,20,34,22,19,31,51,48,45,13,20,17,14,12,11,13,18,11,7,44,36,4,10,9,7,19,23,14,17,25,23,39,45,29,36,26,33,11,17,35,32,18,17,12,18,48,53,6,8,4,6,20,14,10,6,10,11,22,21,14,22,13,18,11,10,20,17,19,16,9,15,9,9,19,15,22,28,32,32,18,10,11,14,6,7,4,8,12,14,13,10,17,19…	659,601,735,731,385,378,337,321,536,445,751,771,406,383,813,901,724,680,1128,1180,1441,1397,1387,1296,298,301,508,497,597,590,851,808,1238,1133,1653,1573,159,162,269,265,390,400,383,367,54,49,419,472,150,146,818,817	33,40,27,27,12,12,8,12,31,28,23,26,22,19,28,20,21,17,18,20,34,46,49,50,16,12,24,19,24,17,34,33,45,50,31,31,9,6,13,10,19,15,26,22,7,11,13,24,11,4,26,36	100	50	7.94912e-07	7.90501e-05	0.888,0.916,0.924,0.927,0.919,0.915,0.867,0.891,0.97,0.947,0.849,0.893,0.95,0.976,0.963,0.952,0.914,0.915,0.917,0.896,0.867,0.918,0.933,0.964,0.906,0.932,0.874,0.902,0.953,0.925,0.857,0.858,0.902,0.949,0.904,0.912,0.948,0.943,0.919,0.896,0.926,0.889,0.928,0.927,0.914,0.936,0.883,0.909,0.939,0.939,0.904,0.859,0.913,0.927,0.913,0.849,0.788,0.805,0.946,0.919,0.919,0.937,0.866,0.85,0.925,0.881,0.925,…	0.909,0.883,0.932,0.931,0.941,0.94,0.955,0.93,0.896,0.888,0.942,0.937,0.902,0.91,0.936,0.957,0.945,0.952,0.969,0.967,0.955,0.938,0.934,0.928,0.903,0.926,0.914,0.929,0.926,0.946,0.926,0.924,0.932,0.919,0.964,0.962,0.898,0.931,0.912,0.93,0.911,0.93,0.88,0.893,0.794,0.69,0.942,0.908,0.872,0.948,0.94,0.919	-0.006
4026	ENSG00000227039	ITGB2-AS1	chr21	+	44927624	44927667	44926867	44927004	44927853	44927902	4026	29,31,23,26,30,31,17,9,14,14,13,16,29,36,7,5,16,18,31,48,12,21,24,25,9,16,9,21,11,14,14,19,25,15,29,36,39,25,28,14,15,28,12,8,16,16,19,12,31,29,15,20,17,12,19,15,14,11,17,7,25,18,10,17,18,25,13,11,35,28,11,9,18,10,12,9,13,13,23,16,32,37,22,20,8,8,5,4,5,6,7,12,8,11,24,9,21,17,9,10,17,17,17,10,9,10,2,7,26,27,25,20,16,9,20,18,27,23,5,11,17,19,9,21,27,27,26,22,22,27,32,25,33,21,11,12,24,23,15,21,21,2…	9,6,1,3,13,14,2,2,4,9,4,6,6,7,0,1,0,4,2,3,3,0,9,12,2,1,5,7,3,4,0,4,8,2,12,7,3,1,2,2,1,2,0,0,2,4,2,4,3,1,8,6,15,12,5,4,1,0,0,1,4,1,1,0,9,11,5,1,15,8,3,2,3,2,2,2,1,2,6,4,3,2,1,4,6,2,6,1,4,7,1,5,9,1,2,2,0,3,0,0,1,0,1,3,2,0,0,0,11,5,5,3,1,0,4,2,2,1,4,3,8,1,12,5,2,9,5,3,8,6,5,9,4,6,5,4,6,10,2,2,4,2,5,4,8,5,4,6,0,0,8,10,7,7,3,0,9,15,8,1,15,13,5,2,2,2,3,9,2,3,4,3,3,4,2,2,3,4,6,7,9,9,20,24,2,1,8,3,4,7,1,…	29,24,21,18,24,28,39,42,34,51,36,31,17,24,54,56,52,52,26,35,43,44,34,35,70,84,49,46,74,55,60,57,34,65,31,21,15,9,25,27,47,52,36,28,13,6,16,23,15,12,18,14	0,0,3,1,3,2,6,7,4,5,3,5,1,1,5,3,7,10,3,3,0,2,3,2,8,18,5,4,10,28,2,6,1,2,2,6,0,0,1,2,2,1,0,0,1,4,3,0,1,0,1,2	93	50	2.91989e-14	6.97785e-12	0.634,0.735,0.925,0.823,0.554,0.543,0.82,0.708,0.653,0.455,0.636,0.589,0.722,0.734,1.0,0.729,1.0,0.708,0.893,0.896,0.683,1.0,0.589,0.528,0.708,0.896,0.492,0.617,0.663,0.653,1.0,0.719,0.627,0.801,0.565,0.734,0.875,0.931,0.883,0.79,0.89,0.883,1.0,1.0,0.811,0.683,0.836,0.617,0.847,0.94,0.502,0.642,0.379,0.35,0.671,0.668,0.883,1.0,1.0,0.79,0.771,0.906,0.843,1.0,0.518,0.55,0.583,0.855,0.556,0.653,0.66…	1.0,1.0,0.79,0.906,0.811,0.883,0.778,0.763,0.82,0.846,0.866,0.769,0.901,0.928,0.853,0.909,0.8,0.737,0.823,0.862,1.0,0.922,0.859,0.904,0.825,0.715,0.84,0.861,0.799,0.514,0.942,0.836,0.948,0.946,0.893,0.653,1.0,1.0,0.931,0.879,0.927,0.965,1.0,1.0,0.875,0.446,0.741,1.0,0.89,1.0,0.906,0.79	-0.127
4091	ENSG00000239697	TNFSF12	chr17	+	7553586	7553825	7550942	7550978	7556777	7556902	4091	43,32,9,11,17,21,15,18,2,14,11,15,24,29,24,22,22,30,16,18,22,21,24,20,17,16,11,7,31,7,29,32,13,19,20,15,23,15,9,10,12,25,7,8,10,10,10,12,19,12,25,20,21,17,7,1,14,21,18,22,14,12,8,12,47,25,15,12,42,38,21,11,12,13,6,5,3,3,14,15,17,19,3,6,19,15,11,9,10,12,21,13,13,8,16,10,13,8,5,7,21,23,10,10,15,13,2,4,9,5,38,37,15,10,39,15,27,27,12,18,23,27,20,29,11,20,23,21,13,23,15,21,12,16,28,23,35,38,9,12,30,24…	79,76,37,27,37,44,32,30,6,15,33,40,64,40,33,36,28,42,27,24,33,36,34,37,32,22,13,20,27,27,46,47,48,52,65,41,31,30,32,46,20,16,13,7,23,15,23,26,39,50,31,25,30,30,14,11,21,25,31,24,17,14,8,13,51,50,29,30,59,72,40,22,10,10,15,12,18,14,12,24,29,28,18,15,17,13,21,21,15,20,16,16,14,18,21,20,17,26,8,8,48,54,20,12,9,15,8,10,23,22,55,49,52,50,46,33,64,59,22,21,34,47,18,23,24,12,58,62,76,65,49,44,32,40,43,3…	13,14,21,20,4,22,36,41,15,13,19,14,12,13,9,9,27,37,11,7,19,27,9,9,30,25,10,8,17,18,35,24,19,13,19,21,20,19,26,19,8,11,13,20,19,12,3,3,15,7,24,29	40,22,40,38,27,33,102,109,30,35,35,34,48,41,45,57,57,66,17,21,69,61,30,17,48,50,53,62,44,39,63,75,34,27,39,26,25,31,48,32,50,46,47,38,13,25,15,19,38,35,51,52	100	50	4.65571e-07	4.80021e-05	0.214,0.174,0.108,0.169,0.187,0.193,0.19,0.231,0.143,0.318,0.143,0.158,0.158,0.266,0.267,0.234,0.282,0.263,0.229,0.273,0.25,0.226,0.261,0.213,0.21,0.267,0.297,0.149,0.365,0.115,0.24,0.254,0.119,0.154,0.133,0.155,0.271,0.2,0.123,0.098,0.231,0.439,0.212,0.364,0.179,0.25,0.179,0.188,0.196,0.107,0.287,0.286,0.259,0.221,0.2,0.043,0.25,0.296,0.225,0.314,0.292,0.3,0.333,0.316,0.315,0.2,0.205,0.167,0.263…	0.14,0.241,0.208,0.208,0.069,0.25,0.15,0.158,0.2,0.157,0.213,0.171,0.111,0.137,0.091,0.073,0.191,0.219,0.244,0.143,0.121,0.181,0.13,0.209,0.238,0.2,0.086,0.061,0.162,0.188,0.217,0.138,0.218,0.194,0.196,0.288,0.286,0.235,0.213,0.229,0.074,0.107,0.121,0.208,0.422,0.194,0.091,0.073,0.165,0.091,0.19,0.218	0.051
4096	ENSG00000072818	ACAP1	chr17	+	7337262	7337369	7336579	7336787	7341947	7342067	4096	42,67,38,37,47,44,29,43,29,26,47,42,56,52,48,57,101,93,107,88,61,58,36,44,36,26,38,29,55,74,36,60,53,57,52,55,10,22,32,28,50,45,24,25,42,41,48,56,87,82,31,35,51,51,48,61,28,33,35,39,57,33,27,33,58,67,35,34,64,77,31,31,12,21,18,26,30,26,56,75,125,108,68,64,53,50,27,32,23,21,52,46,19,18,43,56,38,32,15,22,57,37,26,21,19,20,40,24,56,39,69,82,41,36,47,42,66,68,35,41,42,49,37,39,55,52,62,42,36,38,58,51…	3,5,3,3,4,4,4,1,2,1,1,0,3,0,6,4,11,6,11,9,2,1,10,5,3,1,2,0,3,3,6,3,2,2,4,1,2,0,3,1,5,0,0,3,3,2,3,2,2,4,2,2,12,8,5,1,2,4,2,0,1,1,2,1,10,6,1,1,3,5,4,0,1,4,5,2,0,1,2,2,3,5,7,5,2,1,1,4,2,0,6,1,7,1,1,3,2,3,0,0,3,2,0,2,0,0,2,6,5,3,5,5,6,1,2,0,2,3,0,1,0,3,0,2,2,0,7,4,4,2,4,2,12,3,2,1,0,0,4,0,1,7,3,1,9,10,1,0,0,1,4,0,1,0,0,3,7,9,6,1,2,1,1,5,2,1,1,4,1,1,2,2,10,6,2,4,8,14,4,3,11,6,7,9,0,0,7,9,3,3,3,1,5,2,1…	82,97,67,55,52,28,86,104,65,77,106,99,94,104,42,38,78,64,82,81,124,121,97,91,90,107,44,49,62,54,115,121,127,127,143,98,24,23,63,46,69,84,78,65,35,32,80,76,36,44,108,94	3,2,3,4,1,1,4,4,2,3,5,5,2,3,4,4,3,2,1,2,7,6,2,5,6,0,4,2,3,2,6,13,12,3,4,4,3,0,5,2,8,3,0,3,0,0,7,4,1,0,4,4	100	50	0.000158907	0.010541	0.875,0.87,0.864,0.86,0.855,0.846,0.784,0.956,0.879,0.929,0.959,1.0,0.903,1.0,0.8,0.877,0.821,0.886,0.829,0.83,0.938,0.967,0.643,0.815,0.857,0.929,0.905,1.0,0.902,0.925,0.75,0.909,0.93,0.934,0.867,0.965,0.714,1.0,0.842,0.933,0.833,1.0,1.0,0.806,0.875,0.911,0.889,0.933,0.956,0.911,0.886,0.897,0.68,0.761,0.828,0.968,0.875,0.805,0.897,1.0,0.966,0.943,0.871,0.943,0.744,0.848,0.946,0.944,0.914,0.885,0…	0.932,0.96,0.918,0.873,0.963,0.933,0.915,0.929,0.942,0.928,0.914,0.908,0.959,0.945,0.84,0.826,0.929,0.941,0.976,0.953,0.899,0.91,0.96,0.901,0.882,1.0,0.846,0.925,0.912,0.931,0.906,0.823,0.841,0.955,0.947,0.925,0.8,1.0,0.863,0.92,0.812,0.933,1.0,0.915,1.0,1.0,0.851,0.905,0.947,1.0,0.931,0.922	-0.03
4109	ENSG00000072778	ACADVL	chr17	+	7224145	7224243	7223812	7224069	7224320	7224393	4109	242,295,212,208,213,206,270,265,221,194,251,255,288,246,171,168,306,352,301,288,326,313,238,245,288,290,201,214,174,182,408,427,210,213,352,358,258,259,122,122,122,139,124,130,177,173,223,234,349,299,248,224,303,252,138,116,297,312,330,261,150,147,234,246,388,410,292,313,446,407,219,212,119,139,152,158,190,215,184,195,254,266,163,164,206,211,197,194,143,144,271,225,190,241,285,272,440,486,96,104,…	2,7,3,6,5,9,11,10,4,1,10,13,8,4,6,4,4,4,16,8,6,8,2,6,7,5,8,2,3,4,8,7,12,6,6,6,4,1,10,8,3,4,2,2,7,4,10,13,5,8,5,5,7,6,5,13,7,7,5,4,5,0,19,12,11,5,15,8,19,15,6,12,7,9,8,6,12,13,2,3,8,9,2,1,5,2,3,1,6,3,4,4,4,1,2,7,14,14,3,2,14,15,0,0,3,0,5,4,4,4,5,5,25,20,15,5,10,10,2,6,3,13,2,2,4,6,12,9,14,10,9,8,18,12,5,3,3,1,4,7,11,6,3,1,5,3,0,2,1,10,10,4,3,5,6,9,9,2,5,3,13,3,12,7,9,7,8,8,9,15,7,5,13,8,12,8,3,6,1…	3.47356e+157	19,24,7,15,9,5,21,22,19,13,14,17,15,17,12,12,10,19,8,11,8,17,6,1,23,18,34,27,5,5,4,10,30,21,9,9,17,10,16,17,12,13,16,13,8,17,9,5,14,14,14,15	100	50	2.21316e-06	0.000199495	0.984,0.955,0.972,0.945,0.955,0.92,0.925,0.93,0.965,0.99,0.926,0.907,0.947,0.969,0.934,0.955,0.975,0.978,0.904,0.947,0.964,0.951,0.983,0.953,0.954,0.967,0.926,0.982,0.967,0.958,0.962,0.968,0.897,0.947,0.967,0.968,0.97,0.992,0.859,0.884,0.953,0.946,0.969,0.97,0.927,0.956,0.918,0.9,0.972,0.949,0.961,0.957,0.956,0.955,0.932,0.817,0.955,0.957,0.971,0.97,0.938,1.0,0.86,0.911,0.946,0.976,0.907,0.951,0.…	0.901,0.881,0.963,0.92,0.959,0.978,0.966,0.963,0.872,0.911,0.932,0.925,0.924,0.916,0.931,0.929,0.968,0.939,0.957,0.939,0.942,0.9,0.933,0.985,0.914,0.929,0.844,0.875,0.971,0.969,0.983,0.964,0.862,0.898,0.945,0.935,0.943,0.96,0.937,0.938,0.956,0.947,0.931,0.944,0.965,0.932,0.961,0.98,0.948,0.947,0.938,0.925	0.013
4138	ENSG00000141480	ARRB2	chr17	+	4715012	4715043	4710595	4710744	4715972	4716033	4138	165,224,149,159,247,192,214,186,217,253,234,224,157,131,229,203,239,236,316,337,87,120,243,204,159,144,254,306,225,235,176,166,229,217,203,203,160,161,410,386,282,261,149,127,164,189,285,303,160,155,179,168,289,261,245,243,205,200,184,158,192,187,335,329,212,135,200,173,273,319,95,139,102,95,172,153,192,182,212,214,406,423,155,167,189,219,134,138,161,192,133,108,178,163,143,148,112,87,47,49,202,1…	108,122,70,63,85,94,73,67,97,122,82,72,52,63,101,82,173,179,103,91,47,47,127,153,54,70,111,111,101,127,94,71,101,95,126,131,51,55,86,88,81,76,68,61,100,117,124,131,69,82,99,93,140,167,92,89,70,63,52,58,72,66,79,68,124,99,52,55,139,107,64,65,40,38,72,66,50,37,83,88,123,131,91,90,142,138,90,99,82,75,77,77,73,77,81,82,51,32,8,11,68,58,30,32,36,31,30,29,67,57,85,76,30,19,59,72,41,41,64,63,49,65,59,56…	160,111,172,183,86,104,115,89,192,216,181,203,137,115,249,261,216,262,177,190,406,321,231,240,169,159,197,208,204,225,210,195,393,370,237,243,37,40,42,50,140,125,197,154,11,14,105,103,51,57,168,151	62,56,76,82,27,22,61,48,29,45,58,66,23,32,75,64,78,82,57,82,89,86,76,83,63,41,62,66,76,86,121,103,93,103,88,79,23,23,22,28,39,41,78,58,6,4,41,50,29,24,49,61	81	50	5.34054e-05	0.00390138	0.485,0.531,0.568,0.609,0.642,0.558,0.644,0.631,0.58,0.561,0.638,0.658,0.651,0.562,0.583,0.604,0.46,0.449,0.654,0.696,0.533,0.612,0.542,0.451,0.645,0.559,0.585,0.63,0.579,0.533,0.536,0.591,0.583,0.585,0.499,0.489,0.659,0.644,0.746,0.73,0.682,0.679,0.575,0.562,0.503,0.499,0.587,0.588,0.589,0.538,0.527,0.527,0.56,0.491,0.622,0.628,0.644,0.662,0.686,0.627,0.622,0.636,0.724,0.749,0.513,0.457,0.704,0.…	0.614,0.55,0.583,0.579,0.663,0.745,0.538,0.534,0.803,0.748,0.658,0.655,0.786,0.689,0.672,0.716,0.631,0.664,0.657,0.589,0.738,0.697,0.652,0.641,0.623,0.705,0.662,0.66,0.624,0.618,0.517,0.539,0.723,0.689,0.624,0.655,0.498,0.518,0.541,0.524,0.689,0.653,0.609,0.621,0.531,0.684,0.613,0.56,0.521,0.594,0.679,0.604	-0.036
4269	ENSG00000141002	TCF25	chr16	+	89878460	89878627	89873643	89873859	89883350	89883512	4269	3,10,3,1,6,5,12,11,4,3,6,3,14,13,3,1,9,15,4,4,16,4,9,13,7,6,9,14,7,13,5,6,6,6,6,10,10,12,10,7,11,6,7,0,3,8,8,7,6,7,9,10,8,3,9,4,1,4,8,9,4,1,17,2,3,2,11,3,20,6,4,3,7,4,4,4,1,2,6,8,13,4,7,12,3,5,8,13,7,9,1,4,3,3,4,1,3,1,0,3,4,5,5,3,5,2,4,1,1,5,11,9,1,4,5,14,10,8,10,12,7,2,4,4,13,8,8,10,5,3,6,9,0,1,4,5,7,9,1,3,7,4,7,7,2,4,5,7,3,1,4,0,5,11,9,4,4,2,5,8,2,2,2,4,3,0,7,6,7,4,4,10,3,13,6,7,7,9,3,4,12,4,1,…	26,28,11,24,14,12,25,14,8,4,39,20,29,27,10,6,26,25,26,30,30,29,18,20,20,13,23,23,13,23,28,20,21,32,29,24,19,24,24,28,27,24,9,4,14,25,27,22,18,24,20,28,14,10,12,19,25,17,30,24,4,15,33,34,20,17,11,13,41,42,12,12,13,12,10,9,12,11,10,11,23,34,17,21,10,9,11,14,11,20,12,11,16,15,24,17,8,13,5,8,29,30,8,5,10,13,20,22,13,14,28,30,9,7,47,40,26,39,20,32,17,15,18,13,21,16,27,33,11,17,15,12,7,14,21,26,15,27,1…	4,2,7,8,1,1,5,3,13,6,8,7,4,7,6,1,6,12,0,7,8,4,9,11,4,7,2,6,9,8,4,8,5,4,6,7,2,1,1,0,3,1,14,12,0,1,1,1,5,3,7,9	16,16,23,21,13,13,49,47,49,39,19,24,29,39,20,18,39,29,30,32,23,31,23,16,60,33,31,22,21,22,28,46,34,37,33,27,19,11,16,18,26,21,34,44,10,7,13,10,16,11,12,33	100	50	5.42857e-07	5.48695e-05	0.055,0.152,0.12,0.02,0.176,0.172,0.194,0.282,0.2,0.273,0.071,0.07,0.194,0.194,0.13,0.077,0.148,0.231,0.071,0.062,0.211,0.065,0.2,0.245,0.149,0.188,0.164,0.233,0.212,0.22,0.082,0.13,0.125,0.086,0.094,0.172,0.208,0.2,0.172,0.111,0.169,0.111,0.28,0.0,0.097,0.138,0.129,0.137,0.143,0.127,0.184,0.152,0.222,0.13,0.273,0.095,0.02,0.105,0.118,0.158,0.333,0.032,0.205,0.029,0.07,0.056,0.333,0.103,0.196,0.0…	0.111,0.059,0.132,0.16,0.037,0.037,0.049,0.031,0.117,0.071,0.174,0.127,0.065,0.082,0.13,0.027,0.071,0.171,0.0,0.099,0.148,0.061,0.164,0.256,0.032,0.096,0.031,0.12,0.176,0.154,0.067,0.08,0.068,0.051,0.083,0.115,0.05,0.043,0.03,0.0,0.055,0.023,0.171,0.12,0.0,0.067,0.037,0.048,0.135,0.12,0.226,0.12	0.045
4419	ENSG00000103121	CMC2	chr16	-	80981805	80981877	80966447	80976179	80997313	80997372	4419	76,85,34,26,65,63,40,38,37,42,48,42,51,37,24,25,26,42,47,29,57,60,43,33,72,74,25,40,22,19,51,51,30,38,35,33,37,34,26,21,24,21,18,26,16,14,16,28,57,45,45,34,27,34,29,31,31,39,37,41,38,26,33,32,46,50,28,36,107,71,29,33,23,15,14,20,32,30,18,19,21,29,42,29,17,32,19,26,24,20,27,24,23,35,19,40,42,37,16,31,34,37,35,34,37,31,30,23,34,25,49,53,19,17,32,26,51,57,77,80,70,53,56,68,11,13,54,39,74,73,62,61,23…	7,3,2,1,5,5,1,1,4,1,6,4,3,0,1,6,4,4,1,0,2,3,3,3,3,2,4,2,1,0,2,1,0,0,5,8,2,1,1,3,0,1,3,1,0,0,4,0,2,0,6,2,3,5,3,3,1,0,2,1,4,2,7,6,1,1,1,2,5,4,2,0,1,1,0,0,0,0,0,2,1,1,3,1,2,2,0,1,2,1,5,2,2,3,0,0,1,0,0,0,0,2,2,2,1,2,2,1,1,2,4,3,4,3,0,0,5,4,2,6,5,0,4,2,1,0,9,5,11,14,4,5,1,0,1,0,4,2,3,0,4,2,2,2,0,1,6,6,0,3,3,1,1,4,1,1,4,5,1,0,5,2,0,1,1,0,3,3,1,3,0,1,2,1,1,2,1,1,2,1,3,4,4,6,0,0,6,6,1,3,1,1,7,11,2,2,0,3,…	32,27,35,23,20,17,68,73,30,29,32,21,49,44,34,34,50,63,31,17,18,30,9,9,61,49,37,33,31,30,23,28,22,23,26,26,49,35,36,32,51,36,43,37,31,20,18,16,27,35,25,37	3,2,0,3,0,2,4,0,0,2,0,0,3,2,1,2,2,2,2,1,0,2,1,1,4,2,0,1,2,1,2,1,2,3,0,1,1,0,0,0,1,1,1,2,1,0,3,1,1,0,2,4	100	50	1.10456e-08	1.38421e-06	0.844,0.934,0.895,0.929,0.867,0.863,0.952,0.95,0.822,0.955,0.8,0.84,0.895,1.0,0.923,0.676,0.765,0.84,0.959,1.0,0.934,0.909,0.878,0.846,0.923,0.949,0.758,0.909,0.917,1.0,0.927,0.962,1.0,1.0,0.778,0.673,0.902,0.944,0.929,0.778,1.0,0.913,0.75,0.929,1.0,1.0,0.667,1.0,0.934,1.0,0.789,0.895,0.818,0.773,0.829,0.838,0.939,1.0,0.902,0.953,0.826,0.867,0.702,0.727,0.958,0.962,0.933,0.9,0.915,0.899,0.879,1.0…	0.842,0.871,1.0,0.793,1.0,0.81,0.895,1.0,1.0,0.879,1.0,1.0,0.891,0.917,0.944,0.895,0.926,0.94,0.886,0.895,1.0,0.882,0.818,0.818,0.884,0.925,1.0,0.943,0.886,0.938,0.852,0.933,0.846,0.793,1.0,0.929,0.961,1.0,1.0,1.0,0.962,0.947,0.956,0.902,0.939,1.0,0.75,0.889,0.931,1.0,0.862,0.822	-0.021
4641	ENSG00000102898	NUTF2	chr16	+	67847277	67847456	67846934	67846985	67865101	67865229	4641	2,3,3,6,7,3,4,2,2,4,10,10,8,7,2,2,5,5,11,10,15,5,2,2,6,6,5,2,6,7,5,11,3,2,6,3,5,7,3,2,7,15,2,0,4,4,3,4,11,6,7,4,8,8,4,5,8,4,7,1,6,8,10,8,12,6,2,4,13,13,4,3,1,0,1,5,1,0,4,6,4,4,3,4,3,6,12,6,4,5,6,7,2,5,1,5,7,4,1,1,5,10,1,4,0,0,0,6,4,2,10,10,0,1,2,5,6,5,6,5,6,5,6,6,0,1,7,14,3,6,12,6,6,1,5,2,2,11,2,5,11,5,8,4,5,3,3,2,3,0,3,3,1,3,4,4,1,3,3,1,7,3,3,3,1,1,7,1,4,11,3,6,3,5,3,1,0,4,10,3,5,5,4,3,1,0,4,3,4…	35,29,36,23,11,17,36,40,27,21,32,46,49,44,12,17,42,24,47,42,50,43,17,28,38,53,13,11,15,23,37,48,34,37,32,29,23,29,16,22,26,15,9,8,9,8,14,7,40,41,12,14,32,23,13,12,17,14,26,27,11,18,25,21,47,44,18,18,50,58,20,15,9,11,12,18,15,12,21,18,25,17,24,20,12,14,9,15,6,8,26,19,17,22,24,12,27,40,6,5,34,49,12,4,9,21,12,11,19,18,49,54,29,36,25,22,49,38,35,39,20,18,23,30,12,16,32,43,39,40,38,33,29,23,31,17,32,2…	2,5,5,5,2,1,12,14,3,3,0,3,6,3,6,2,3,6,1,0,4,5,0,0,6,4,2,2,5,8,2,6,4,1,2,5,2,8,3,4,0,0,6,4,0,0,8,2,0,3,3,5	19,24,22,22,13,29,63,69,26,24,19,21,52,47,64,39,55,67,24,22,29,25,8,17,55,59,21,38,35,38,41,31,34,29,12,12,22,21,31,27,29,36,45,44,11,6,8,10,20,23,24,32	100	50	6.6286e-09	8.62221e-07	0.028,0.049,0.04,0.115,0.241,0.081,0.053,0.024,0.036,0.087,0.135,0.098,0.075,0.074,0.077,0.056,0.056,0.094,0.105,0.106,0.13,0.055,0.056,0.034,0.073,0.054,0.161,0.083,0.167,0.132,0.063,0.103,0.042,0.026,0.086,0.049,0.098,0.108,0.086,0.043,0.119,0.333,0.1,0.0,0.182,0.2,0.097,0.222,0.121,0.068,0.226,0.125,0.111,0.148,0.133,0.172,0.19,0.125,0.119,0.018,0.214,0.182,0.167,0.16,0.113,0.064,0.053,0.1,0.1…	0.05,0.094,0.102,0.102,0.071,0.017,0.087,0.092,0.055,0.059,0.0,0.067,0.055,0.031,0.045,0.025,0.027,0.043,0.02,0.0,0.065,0.091,0.0,0.0,0.052,0.033,0.045,0.026,0.067,0.095,0.024,0.088,0.056,0.017,0.077,0.172,0.043,0.16,0.046,0.069,0.0,0.0,0.062,0.043,0.0,0.0,0.333,0.091,0.0,0.061,0.059,0.072	0.036
4761	ENSG00000182885	ADGRG3	chr16	+	57683931	57684212	57680504	57680617	57684389	57684483	4761	81,98,97,95,184,181,108,79,228,247,91,107,65,59,185,220,228,260,252,223,33,31,164,148,68,62,247,266,239,206,51,58,154,143,107,143,74,67,212,190,129,144,96,95,170,170,205,240,167,170,207,179,172,173,223,213,198,215,155,144,126,142,186,156,115,121,82,115,167,145,75,70,47,35,149,133,162,173,257,270,407,392,232,214,266,245,89,87,145,176,192,144,134,136,236,207,103,106,52,51,130,135,81,96,68,52,150,15…	10,13,7,3,31,38,4,4,17,13,11,14,8,10,5,12,11,13,16,9,4,3,14,8,3,10,29,32,8,11,11,4,10,13,8,13,10,14,24,16,12,23,0,2,10,11,6,16,15,15,21,14,4,7,35,21,17,11,10,10,14,11,39,52,15,17,12,9,21,27,12,8,6,8,13,12,9,10,14,21,19,22,14,14,10,13,11,5,9,6,7,7,6,8,14,17,1,4,1,2,16,13,8,19,11,11,23,24,24,17,7,7,6,5,6,7,4,6,5,9,17,15,27,22,11,16,31,22,9,5,31,25,11,10,12,8,17,10,11,11,4,6,6,6,11,10,28,21,8,7,22,2…	286,266,374,401,255,228,29,22,161,161,250,286,72,69,278,267,234,215,440,464,615,592,518,546,97,137,230,202,225,225,478,445,542,557,696,699,60,66,122,87,201,172,160,165,28,25,481,483,80,82,237,249	13,15,18,19,8,13,2,1,19,14,16,6,10,8,10,11,5,13,23,10,13,16,16,22,8,6,18,6,7,7,20,14,12,10,33,18,5,3,4,10,10,10,9,15,1,0,13,12,0,3,18,11	100	50	0	0	0.802,0.79,0.874,0.941,0.748,0.704,0.931,0.908,0.87,0.905,0.805,0.793,0.802,0.747,0.949,0.902,0.912,0.909,0.887,0.925,0.805,0.838,0.854,0.902,0.919,0.756,0.81,0.806,0.937,0.904,0.699,0.879,0.885,0.846,0.87,0.846,0.787,0.705,0.815,0.856,0.843,0.758,1.0,0.96,0.895,0.885,0.945,0.882,0.848,0.85,0.831,0.865,0.956,0.925,0.761,0.835,0.853,0.907,0.886,0.878,0.818,0.866,0.705,0.6,0.793,0.781,0.774,0.865,0…	0.917,0.899,0.912,0.913,0.941,0.898,0.879,0.917,0.809,0.852,0.887,0.96,0.783,0.812,0.933,0.924,0.959,0.892,0.905,0.959,0.959,0.949,0.942,0.925,0.858,0.919,0.865,0.944,0.941,0.941,0.923,0.941,0.958,0.965,0.913,0.951,0.857,0.917,0.938,0.813,0.91,0.896,0.899,0.846,0.933,1.0,0.949,0.953,1.0,0.932,0.868,0.919	-0.068
4821	ENSG00000102921	N4BP1	chr16	-	48551385	48551482	48548006	48548114	48553538	48553669	4821	212,230,76,85,258,250,139,120,178,219,158,151,128,117,189,193,102,102,178,124,93,110,175,144,163,165,209,211,180,202,132,131,178,167,140,154,167,164,266,255,247,268,163,165,212,208,203,207,104,86,167,166,185,172,206,200,117,103,102,145,200,203,31,24,139,139,171,169,329,384,112,127,92,81,131,108,98,112,215,173,226,221,220,255,139,137,198,180,173,183,129,99,174,184,102,62,34,32,15,16,183,185,164,16…	5,8,5,2,2,3,4,3,9,11,4,8,5,5,7,5,3,4,6,4,12,3,6,5,7,10,27,12,10,7,17,7,1,11,12,8,4,3,8,6,10,7,4,6,10,7,11,18,1,3,10,6,19,15,20,8,1,4,11,11,12,13,30,28,6,4,5,8,19,17,0,2,6,4,8,5,6,7,10,12,3,7,13,7,6,5,8,6,18,18,7,13,14,7,15,9,1,0,0,5,4,6,3,1,4,4,10,7,33,19,8,4,1,1,15,20,9,8,4,4,7,4,3,2,3,4,3,3,4,6,0,1,0,0,3,2,3,4,5,5,3,11,6,7,0,0,6,6,4,11,3,2,5,6,6,7,1,1,2,1,5,6,7,9,2,1,6,4,7,5,17,22,3,3,2,3,4,4,4…	97,107,276,263,62,76,58,46,161,168,164,170,149,128,183,153,229,202,256,255,265,224,291,306,103,132,81,113,197,219,131,137,147,119,221,198,55,59,22,26,89,97,125,142,8,8,45,57,41,35,154,167	4,2,19,7,1,3,2,0,14,10,2,2,12,10,3,7,1,5,3,2,2,4,10,7,3,3,0,1,4,3,4,2,5,7,6,5,2,0,3,3,3,1,17,12,0,4,1,2,1,1,4,1	100	50	4.39912e-05	0.00323666	0.955,0.935,0.884,0.955,0.985,0.977,0.946,0.952,0.908,0.909,0.952,0.904,0.928,0.921,0.931,0.951,0.944,0.927,0.937,0.939,0.795,0.948,0.936,0.935,0.921,0.892,0.795,0.898,0.9,0.935,0.795,0.903,0.989,0.884,0.854,0.906,0.954,0.965,0.943,0.955,0.925,0.95,0.953,0.932,0.914,0.937,0.902,0.852,0.981,0.935,0.893,0.933,0.83,0.851,0.837,0.926,0.983,0.928,0.823,0.868,0.893,0.886,0.341,0.3,0.921,0.946,0.945,0.9…	0.924,0.964,0.879,0.949,0.969,0.927,0.935,1.0,0.852,0.894,0.976,0.977,0.861,0.865,0.968,0.916,0.991,0.953,0.977,0.985,0.985,0.966,0.936,0.956,0.945,0.957,1.0,0.983,0.961,0.973,0.942,0.972,0.936,0.895,0.948,0.952,0.932,1.0,0.786,0.812,0.937,0.98,0.786,0.855,1.0,0.5,0.957,0.934,0.953,0.946,0.951,0.988	-0.012
4934	ENSG00000149923	PPP4C	chr16	+	30082745	30082847	30082483	30082534	30083393	30083567	4934	214,209,143,148,212,231,188,182,155,196,204,206,185,166,172,142,149,173,271,253,137,142,140,121,174,146,204,189,210,167,205,218,161,172,215,204,148,140,234,279,166,157,161,139,185,172,228,192,245,222,165,181,203,234,161,165,182,182,133,166,164,160,165,163,210,226,151,141,378,369,154,172,106,96,149,164,221,228,181,151,320,274,234,215,281,224,136,130,187,187,223,228,181,187,386,356,397,414,123,129,…	4,6,2,2,11,5,1,3,8,5,7,7,4,0,4,2,0,2,7,5,1,2,4,5,1,6,3,6,1,1,5,5,2,3,2,0,1,1,5,0,5,1,5,6,1,2,1,3,0,4,4,7,2,4,2,4,1,1,0,2,3,0,1,4,2,2,2,2,4,6,2,5,1,0,5,3,3,1,2,2,2,7,4,3,0,3,2,2,3,0,0,4,3,4,3,5,8,5,5,1,3,7,1,2,1,5,0,9,4,0,4,4,2,7,4,2,2,5,4,3,1,4,3,4,2,0,2,2,7,9,5,8,8,9,3,1,2,1,2,5,6,4,2,5,2,1,2,3,4,1,4,2,3,2,3,2,3,3,2,1,4,8,3,4,5,3,0,1,1,2,3,1,5,3,5,3,5,5,4,4,3,3,2,2,0,0,4,5,8,11,7,12,5,7,2,7,2,2,…	2.92329e+155	4,10,7,3,6,5,10,4,7,6,5,8,1,3,4,3,7,3,5,4,4,8,3,3,6,4,7,4,4,2,5,2,3,7,6,6,7,4,9,4,4,7,9,6,4,5,3,17,4,4,7,5	100	50	0.000114737	0.00782546	0.964,0.946,0.973,0.974,0.906,0.959,0.989,0.968,0.906,0.951,0.936,0.936,0.959,1.0,0.956,0.973,1.0,0.977,0.951,0.962,0.986,0.973,0.946,0.924,0.989,0.924,0.971,0.94,0.991,0.988,0.953,0.956,0.976,0.966,0.982,1.0,0.987,0.986,0.959,1.0,0.943,0.987,0.942,0.921,0.989,0.977,0.991,0.97,1.0,0.965,0.954,0.928,0.981,0.967,0.976,0.954,0.989,0.989,1.0,0.976,0.965,1.0,0.988,0.953,0.981,0.983,0.974,0.972,0.979,0…	0.973,0.943,0.95,0.979,0.962,0.966,0.948,0.979,0.938,0.951,0.963,0.943,0.989,0.966,0.963,0.973,0.957,0.982,0.961,0.967,0.978,0.957,0.978,0.976,0.951,0.971,0.953,0.973,0.962,0.976,0.971,0.988,0.982,0.957,0.953,0.96,0.948,0.97,0.943,0.974,0.981,0.963,0.934,0.956,0.967,0.954,0.98,0.901,0.97,0.969,0.945,0.968	0.006
4987	ENSG00000261832	AC138894.1	chr16	-	28479643	28479765	28477736	28477877	28482104	28482198	4987	14,13,4,6,20,13,5,5,4,6,12,7,12,7,6,4,20,9,13,8,6,4,9,5,19,2,11,9,12,7,5,9,8,9,6,8,3,6,9,8,8,8,1,3,6,6,7,7,14,6,13,14,7,4,8,4,6,6,5,3,6,7,13,10,14,15,2,3,16,10,5,7,4,1,6,8,8,6,5,0,16,5,2,15,4,9,5,3,1,6,8,4,6,5,11,10,22,28,3,5,23,13,5,5,3,1,5,3,9,11,10,14,31,28,7,4,10,5,7,6,16,12,14,9,8,10,11,14,23,27,30,15,18,27,3,8,9,8,3,8,17,28,12,21,11,10,5,11,5,0,17,12,2,8,6,6,31,21,8,7,18,11,7,8,11,18,21,17,…	63,53,24,25,36,41,37,41,20,11,40,30,25,38,24,21,32,28,42,57,28,25,34,21,26,24,19,16,25,26,32,38,29,28,46,34,9,18,28,27,24,22,5,10,16,22,26,30,76,54,32,29,22,39,25,20,33,24,15,21,10,12,29,24,49,53,21,18,42,42,30,16,9,11,20,17,25,28,28,32,47,55,20,21,23,33,13,11,18,16,28,30,9,8,51,51,114,88,23,23,54,44,19,7,12,8,13,13,31,25,54,44,133,120,23,24,54,37,22,21,44,57,23,18,26,22,55,59,80,91,64,52,94,88,2…	5,16,10,14,13,13,19,23,10,21,6,6,11,9,4,4,16,17,5,6,8,6,4,7,8,15,4,10,10,14,12,9,7,14,12,11,15,17,16,12,20,11,15,19,32,19,4,7,8,13,13,4	48,55,37,39,75,69,92,117,48,41,50,59,39,37,51,51,45,56,25,26,46,50,28,23,68,58,60,45,36,44,38,74,72,72,38,51,76,74,99,87,73,58,60,48,99,81,40,48,83,82,38,54	100	50	1.65074e-06	0.000154678	0.1,0.109,0.077,0.107,0.217,0.137,0.063,0.057,0.091,0.214,0.13,0.104,0.194,0.084,0.111,0.087,0.238,0.138,0.134,0.066,0.097,0.074,0.117,0.106,0.268,0.04,0.224,0.22,0.194,0.119,0.072,0.106,0.121,0.138,0.061,0.105,0.143,0.143,0.138,0.129,0.143,0.154,0.091,0.13,0.158,0.12,0.119,0.104,0.084,0.053,0.169,0.194,0.137,0.049,0.138,0.091,0.083,0.111,0.143,0.067,0.231,0.226,0.183,0.172,0.125,0.124,0.045,0.07…	0.05,0.127,0.119,0.152,0.08,0.086,0.094,0.089,0.094,0.204,0.057,0.048,0.124,0.108,0.038,0.038,0.151,0.132,0.091,0.103,0.08,0.057,0.067,0.132,0.056,0.115,0.032,0.1,0.122,0.137,0.136,0.057,0.046,0.089,0.136,0.097,0.09,0.103,0.075,0.065,0.12,0.087,0.111,0.165,0.139,0.105,0.048,0.068,0.046,0.073,0.146,0.036	0.03
5232	ENSG00000103274	NUBP1	chr16	+	10767948	10768032	10761756	10761859	10769046	10769313	5232	60,55,38,34,33,29,51,44,19,8,36,38,46,47,22,12,38,34,60,47,46,55,31,34,47,37,14,13,12,12,68,50,33,37,51,54,39,39,44,27,20,25,25,17,23,29,27,22,48,65,33,32,33,29,21,25,33,17,44,43,11,18,14,35,33,49,26,36,80,62,25,34,19,22,11,19,32,36,17,29,30,42,49,34,25,15,23,20,23,15,29,29,28,15,29,40,44,55,6,12,62,86,22,13,17,14,12,11,11,15,57,54,44,64,49,54,71,42,48,52,39,41,33,34,31,23,50,37,71,49,73,68,49,44…	5,2,0,1,2,1,1,4,1,0,0,1,2,0,2,0,5,2,3,2,3,4,0,2,2,1,1,1,0,0,1,0,2,0,1,3,0,1,1,0,2,0,0,3,0,1,1,0,3,1,1,0,5,2,1,1,2,2,1,0,1,0,5,0,2,4,0,4,6,1,0,2,1,0,2,3,0,0,1,0,2,1,0,3,0,1,1,1,1,1,3,2,0,0,0,1,1,0,2,2,8,7,1,0,0,0,1,2,0,1,2,5,2,2,1,4,5,1,0,3,2,3,1,0,1,0,3,3,9,2,2,1,0,4,2,1,4,4,1,0,3,1,4,0,2,0,1,3,3,0,3,0,0,1,1,0,0,0,1,1,1,3,0,4,0,4,4,2,2,3,0,1,4,2,2,4,0,0,0,4,2,0,0,0,2,1,0,0,5,1,2,2,4,2,8,4,0,0,0,3	39,52,42,33,32,39,150,163,42,51,32,43,55,50,59,55,81,59,21,21,53,51,19,16,79,79,69,42,45,35,67,59,61,39,31,24,63,51,45,46,56,37,43,62,41,44,15,12,61,66,54,51	1,3,1,1,0,3,10,7,6,4,1,0,1,4,1,1,1,2,1,1,3,4,1,1,2,2,1,1,1,2,2,4,3,3,0,1,9,3,5,3,5,6,1,6,6,10,2,1,6,5,3,4	100	50	0	0	0.857,0.932,1.0,0.944,0.892,0.935,0.962,0.846,0.905,1.0,1.0,0.95,0.92,1.0,0.846,1.0,0.792,0.895,0.909,0.922,0.885,0.873,1.0,0.895,0.922,0.949,0.875,0.867,1.0,1.0,0.971,1.0,0.892,1.0,0.962,0.9,1.0,0.951,0.957,1.0,0.833,1.0,1.0,0.739,1.0,0.935,0.931,1.0,0.889,0.97,0.943,1.0,0.767,0.879,0.913,0.926,0.892,0.81,0.957,1.0,0.846,1.0,0.583,1.0,0.892,0.86,1.0,0.818,0.87,0.969,1.0,0.895,0.905,1.0,0.733,0.7…	0.951,0.897,0.955,0.943,1.0,0.867,0.882,0.921,0.778,0.864,0.941,1.0,0.965,0.862,0.967,0.965,0.976,0.937,0.913,0.913,0.898,0.864,0.905,0.889,0.952,0.952,0.972,0.955,0.957,0.897,0.944,0.881,0.91,0.867,1.0,0.923,0.778,0.895,0.818,0.885,0.848,0.755,0.956,0.838,0.774,0.688,0.789,0.857,0.836,0.868,0.9,0.864	0.027
5252	ENSG00000125970	RALY	chr20	+	34073818	34073866	34073562	34073635	34075873	34076039	5252	203,215,127,138,248,250,156,165,100,89,175,207,133,144,136,127,149,167,312,336,105,119,128,134,150,154,121,120,123,116,156,182,192,160,165,172,104,98,164,168,82,93,78,67,109,93,151,150,275,234,100,120,144,148,145,127,155,162,116,117,128,98,151,156,237,232,96,106,256,269,115,104,55,78,83,95,144,147,127,131,284,249,138,132,145,172,67,75,106,114,114,113,83,75,191,256,317,276,72,69,181,225,85,64,65,6…	38,39,13,11,55,47,27,16,17,6,20,18,30,22,20,15,15,28,37,33,22,18,18,25,15,12,18,12,18,8,15,31,27,21,27,30,15,7,10,7,11,16,11,6,10,7,17,14,21,28,13,11,18,31,20,21,19,13,9,13,17,15,19,24,42,43,12,12,25,33,20,7,4,4,14,13,10,10,18,14,22,39,10,8,17,15,7,8,12,9,11,15,13,13,39,28,56,46,7,9,38,30,13,14,6,6,10,16,11,24,42,38,62,56,14,18,25,28,12,14,34,32,15,26,16,20,36,33,51,61,30,28,47,72,13,13,16,20,20,…	3.68345e+155	34,25,25,26,23,21,56,78,28,23,26,40,35,37,30,27,40,37,22,23,27,24,31,13,31,40,42,42,36,26,40,34,38,34,29,25,25,26,20,36,58,38,20,39,31,30,29,26,38,31,33,35	98	50	1.21656e-05	0.000984362	0.732,0.738,0.833,0.865,0.697,0.731,0.747,0.84,0.75,0.883,0.817,0.854,0.693,0.77,0.776,0.812,0.835,0.753,0.811,0.839,0.709,0.771,0.784,0.732,0.836,0.868,0.774,0.836,0.777,0.881,0.841,0.75,0.784,0.795,0.757,0.745,0.78,0.877,0.893,0.924,0.792,0.748,0.783,0.851,0.848,0.871,0.819,0.845,0.87,0.81,0.797,0.848,0.803,0.709,0.787,0.755,0.806,0.864,0.868,0.821,0.793,0.769,0.802,0.768,0.742,0.734,0.803,0.81…	0.847,0.876,0.834,0.818,0.827,0.86,0.825,0.76,0.842,0.856,0.839,0.779,0.775,0.749,0.786,0.827,0.834,0.843,0.851,0.847,0.882,0.879,0.809,0.906,0.851,0.827,0.813,0.81,0.776,0.819,0.825,0.839,0.827,0.845,0.819,0.836,0.76,0.756,0.878,0.795,0.783,0.848,0.882,0.769,0.748,0.72,0.811,0.822,0.736,0.765,0.817,0.804	-0.021
5379	ENSG00000167978	SRRM2	chr16	+	2768504	2768599	2767721	2768261	2768996	2769248	5379	8,11,8,7,7,5,13,17,8,10,7,7,13,14,7,3,15,20,11,20,13,18,9,9,8,5,12,8,10,12,19,8,8,9,12,15,2,7,6,7,3,6,6,2,4,2,7,7,13,15,7,7,17,26,9,6,3,2,11,14,5,5,5,10,8,11,8,4,15,8,3,5,4,3,5,4,0,3,8,10,14,21,7,4,7,5,1,5,4,4,9,5,13,5,6,5,6,10,1,0,5,14,4,0,7,2,5,2,9,7,15,10,1,1,7,13,12,8,6,10,16,12,8,2,12,5,15,13,8,20,16,10,12,5,12,16,15,17,14,17,13,24,17,19,14,25,18,12,2,4,9,7,12,10,5,8,10,7,8,8,5,7,2,6,6,9,2,9…	54,61,27,38,50,39,39,50,28,29,45,61,32,34,30,26,55,63,57,56,28,37,36,32,35,29,44,32,26,37,51,48,39,33,54,58,35,15,45,37,28,22,5,10,26,23,41,62,67,38,34,26,46,50,26,33,27,30,27,35,23,23,53,55,51,59,36,35,48,52,13,13,15,14,20,20,21,20,22,19,38,42,36,23,24,18,14,14,30,18,47,37,30,23,34,47,61,50,7,9,39,42,19,10,22,11,20,15,45,40,47,50,35,37,59,65,54,50,31,42,45,24,17,23,32,35,27,44,58,62,40,35,31,26,…	10,15,16,14,4,6,27,27,9,18,13,13,21,24,7,5,26,12,9,13,11,5,6,8,23,13,9,10,11,10,6,3,5,7,12,17,3,6,5,6,17,17,21,14,6,4,5,12,9,6,7,5	41,46,56,54,42,34,118,107,69,52,77,82,68,74,55,46,84,90,48,55,59,43,49,41,79,74,55,61,56,74,66,52,58,59,86,90,55,46,84,85,85,84,111,115,22,16,24,19,73,63,49,37	100	50	9.89748e-06	0.000816318	0.069,0.083,0.129,0.084,0.065,0.06,0.143,0.145,0.125,0.147,0.072,0.054,0.169,0.171,0.104,0.055,0.12,0.137,0.088,0.152,0.188,0.196,0.111,0.123,0.103,0.079,0.12,0.111,0.161,0.14,0.157,0.077,0.093,0.12,0.1,0.115,0.028,0.189,0.062,0.086,0.051,0.12,0.375,0.091,0.071,0.042,0.079,0.053,0.088,0.165,0.093,0.119,0.156,0.206,0.148,0.083,0.053,0.032,0.169,0.167,0.098,0.098,0.045,0.083,0.073,0.085,0.1,0.054,0…	0.109,0.14,0.125,0.115,0.045,0.081,0.103,0.112,0.061,0.148,0.078,0.073,0.134,0.14,0.06,0.052,0.134,0.062,0.086,0.106,0.085,0.055,0.058,0.089,0.127,0.081,0.076,0.076,0.089,0.063,0.043,0.028,0.041,0.056,0.065,0.086,0.027,0.061,0.029,0.034,0.091,0.092,0.086,0.057,0.12,0.111,0.094,0.24,0.058,0.045,0.067,0.063	0.025
5568	ENSG00000077238	IL4R	chr16	+	27330065	27330198	27313925	27314020	27340185	27340273	5568	47,45,44,46,52,38,40,37,77,78,36,49,72,53,94,69,76,70,55,70,42,41,52,70,24,25,121,111,146,118,47,32,50,47,58,56,14,17,60,34,100,117,24,29,80,69,66,78,65,67,35,36,74,92,70,70,49,50,55,57,65,88,45,46,42,31,31,32,107,87,24,19,40,39,47,48,35,30,112,110,98,87,92,97,45,53,52,42,55,61,21,36,31,40,20,27,3,7,6,0,37,34,19,16,37,42,68,85,78,77,61,57,1,2,77,86,30,21,36,26,27,35,78,73,39,66,96,101,11,5,20,17,…	6,6,9,6,2,6,10,8,9,5,6,3,9,7,16,17,5,8,18,8,2,1,8,5,6,3,10,10,10,15,6,11,4,11,11,11,4,5,7,8,20,10,2,1,6,4,15,9,11,13,3,2,4,4,9,11,4,4,5,6,7,11,9,5,6,8,3,1,9,7,6,5,2,1,12,7,3,4,6,3,8,13,4,8,3,1,2,7,6,6,2,8,4,2,0,1,0,0,0,1,8,4,0,0,2,2,8,5,3,6,8,8,0,0,11,8,2,2,6,6,1,2,5,1,3,8,5,8,0,2,5,4,1,3,4,3,2,1,7,6,2,4,4,5,20,13,7,9,7,14,3,6,4,2,6,5,6,6,19,7,4,3,11,10,2,3,3,8,4,11,11,15,8,6,1,3,10,2,7,4,11,6,14…	33,26,80,61,16,29,18,16,75,69,60,45,74,79,95,83,69,52,84,97,139,147,138,150,14,20,50,53,122,82,59,71,97,82,122,130,2,1,10,15,24,23,48,41,1,3,8,11,11,13,90,96	5,10,8,5,3,4,3,5,17,21,17,7,9,14,18,13,7,12,13,22,22,17,11,24,2,5,13,12,8,18,8,17,7,17,8,10,1,0,3,3,7,9,5,4,1,0,4,4,0,0,11,17	100	50	3.06889e-05	0.00229074	0.797,0.789,0.71,0.793,0.929,0.76,0.667,0.698,0.811,0.886,0.75,0.891,0.8,0.791,0.746,0.67,0.884,0.814,0.604,0.814,0.913,0.953,0.765,0.875,0.667,0.806,0.858,0.847,0.88,0.797,0.797,0.593,0.862,0.681,0.725,0.718,0.636,0.63,0.811,0.68,0.714,0.854,0.857,0.935,0.87,0.896,0.688,0.813,0.747,0.72,0.854,0.9,0.902,0.92,0.795,0.761,0.86,0.862,0.846,0.826,0.823,0.8,0.714,0.821,0.778,0.66,0.838,0.941,0.856,0.8…	0.767,0.565,0.833,0.859,0.727,0.784,0.75,0.615,0.688,0.622,0.638,0.763,0.804,0.738,0.725,0.761,0.831,0.684,0.764,0.688,0.76,0.812,0.863,0.758,0.778,0.667,0.658,0.688,0.884,0.695,0.787,0.676,0.874,0.707,0.884,0.867,0.5,1.0,0.625,0.714,0.632,0.561,0.828,0.837,0.333,1.0,0.5,0.579,1.0,1.0,0.804,0.738	0.067
5790	ENSG00000140379	BCL2A1	chr15	-	79967636	79967692	79960891	79961174	79970699	79971169	5790	51,57,16,10,184,181,13,13,434,429,62,56,26,28,13,31,21,33,135,120,20,17,56,43,40,32,80,107,64,75,40,45,9,7,22,33,18,13,40,51,204,195,186,158,38,48,33,36,40,31,18,32,44,48,101,96,50,47,73,60,150,141,37,25,137,144,31,38,92,92,28,24,20,19,43,56,35,40,44,44,55,45,92,84,84,86,108,83,83,75,45,53,51,60,31,26,24,26,97,94,53,41,41,19,71,71,39,35,134,128,35,40,32,39,20,22,20,33,23,21,61,75,91,96,94,81,59,7…	666,682,304,289,1994,1903,624,605,1813,1724,522,487,399,389,843,854,835,892,890,928,434,458,901,887,1249,1136,1596,1502,1108,1056,626,648,263,294,845,849,459,531,618,545,2614,2586,1942,1898,1784,1721,1195,1142,292,302,1151,1176,1548,1545,2583,2479,1775,1861,1682,1739,1566,1444,1526,1499,741,687,829,847,1555,1459,790,736,449,424,2505,2437,1263,1237,1306,1239,1612,1604,1698,1688,3289,3209,900,877,2…	151,168,190,153,290,309,34,31,78,67,84,82,40,44,91,112,100,102,130,130,101,87,91,93,76,75,65,79,34,50,137,160,147,145,157,130,84,103,92,101,47,47,48,58,16,28,111,111,30,18,212,209	2.26723e+190	100	50	2.37501e-07	2.56003e-05	0.037,0.04,0.026,0.017,0.044,0.045,0.01,0.011,0.107,0.111,0.056,0.054,0.032,0.035,0.008,0.018,0.012,0.018,0.07,0.061,0.023,0.018,0.03,0.024,0.016,0.014,0.024,0.034,0.028,0.034,0.031,0.034,0.017,0.012,0.013,0.019,0.019,0.012,0.031,0.045,0.038,0.036,0.046,0.04,0.011,0.014,0.014,0.016,0.064,0.049,0.008,0.013,0.014,0.015,0.019,0.019,0.014,0.012,0.021,0.017,0.046,0.047,0.012,0.008,0.085,0.095,0.018,0.…	0.032,0.035,0.043,0.035,0.074,0.079,0.037,0.034,0.048,0.041,0.02,0.021,0.035,0.035,0.039,0.047,0.054,0.058,0.029,0.028,0.024,0.021,0.02,0.019,0.108,0.096,0.03,0.038,0.02,0.029,0.02,0.024,0.03,0.03,0.022,0.019,0.032,0.039,0.02,0.021,0.022,0.021,0.015,0.018,0.008,0.014,0.015,0.015,0.021,0.012,0.035,0.033	-0.004
5833	ENSG00000140374	ETFA	chr15	-	76295590	76295737	76292618	76292700	76311349	76311396	5833	78,124,115,93,36,30,86,90,65,50,73,77,94,122,66,41,96,108,65,67,151,148,72,72,112,120,101,92,54,58,196,170,94,89,102,94,99,101,59,57,63,81,33,42,45,39,48,43,112,90,47,41,97,63,71,57,53,51,90,101,63,59,81,75,159,168,70,60,195,217,74,61,39,30,22,16,51,54,72,63,55,39,61,61,40,34,94,83,65,44,33,30,41,43,16,23,29,31,26,27,93,104,26,25,49,55,30,52,72,64,104,99,15,14,43,48,78,71,108,126,73,54,96,105,39,…	3,9,14,3,4,1,3,9,8,4,9,1,14,9,3,1,6,2,7,13,11,11,5,4,9,6,10,4,0,4,17,17,3,3,4,7,6,8,3,3,7,6,5,3,0,3,6,5,11,7,4,4,2,3,9,10,12,7,9,2,7,7,2,12,22,13,3,3,17,17,5,4,3,2,1,1,9,4,8,7,3,5,6,2,1,4,2,4,2,3,4,5,1,2,0,0,2,1,5,4,9,5,1,4,6,1,1,4,4,8,11,16,4,2,13,3,9,2,5,3,6,9,2,7,2,4,8,7,3,2,8,5,0,2,5,3,6,11,7,5,1,4,12,9,3,6,8,5,10,4,2,5,5,2,3,6,4,5,5,9,7,4,6,4,0,0,6,5,5,7,4,3,12,9,7,5,5,2,15,12,8,5,6,2,0,0,2,…	24,25,61,55,31,32,99,96,42,54,28,37,61,67,130,125,72,72,57,57,62,50,46,42,73,57,64,54,65,58,49,55,49,42,37,21,20,23,22,26,19,33,69,50,6,8,28,23,30,43,36,59	3,3,3,2,1,6,15,19,9,10,8,3,10,9,20,14,7,10,8,5,3,3,3,7,7,5,9,3,2,7,10,10,9,11,2,4,1,2,3,2,4,7,5,6,0,0,2,8,1,4,2,4	100	50	2.04069e-06	0.000185031	0.929,0.873,0.804,0.939,0.818,0.938,0.935,0.833,0.802,0.862,0.802,0.975,0.77,0.871,0.917,0.953,0.889,0.964,0.823,0.72,0.873,0.871,0.878,0.9,0.862,0.909,0.835,0.92,1.0,0.879,0.852,0.833,0.94,0.937,0.927,0.87,0.892,0.863,0.908,0.905,0.818,0.871,0.767,0.875,1.0,0.867,0.8,0.811,0.836,0.865,0.855,0.837,0.96,0.913,0.798,0.74,0.688,0.785,0.833,0.962,0.818,0.808,0.953,0.758,0.783,0.866,0.921,0.909,0.852,…	0.8,0.806,0.91,0.932,0.939,0.727,0.767,0.716,0.7,0.73,0.636,0.86,0.753,0.788,0.765,0.817,0.837,0.783,0.781,0.851,0.912,0.893,0.885,0.75,0.839,0.851,0.78,0.9,0.942,0.806,0.71,0.733,0.731,0.656,0.902,0.724,0.909,0.852,0.786,0.867,0.704,0.702,0.873,0.806,1.0,1.0,0.875,0.59,0.938,0.843,0.9,0.881	0.048
5859	ENSG00000140365	COMMD4	chr15	+	75339701	75339878	75339263	75339344	75339964	75340073	5859	37,40,14,18,18,29,12,21,8,7,10,16,25,20,5,7,19,23,33,46,21,18,10,13,5,11,4,7,5,3,11,17,29,27,22,22,4,3,5,4,10,3,4,1,12,6,7,7,23,21,4,8,6,7,8,1,13,8,13,3,6,11,7,6,24,27,6,5,21,16,11,13,2,5,15,12,22,16,6,7,12,13,6,5,2,4,6,5,4,4,14,16,2,3,26,12,72,54,12,15,20,15,2,3,1,3,7,9,12,14,47,45,99,96,5,3,24,21,12,8,32,25,8,11,14,9,11,8,50,29,73,51,74,69,14,10,11,14,3,11,52,53,10,23,19,15,5,3,4,6,9,12,5,8,8,7…	2,1,1,0,2,2,0,2,0,0,1,1,0,0,0,0,0,1,4,3,0,0,0,2,2,0,0,0,0,0,1,1,0,1,2,0,0,0,1,0,0,1,0,0,1,0,0,0,7,2,1,0,1,2,0,0,2,0,1,0,0,1,0,0,1,1,0,0,2,1,0,1,0,0,0,0,1,0,0,0,2,0,1,0,0,0,0,1,0,0,0,1,0,0,0,3,5,4,1,1,1,0,0,0,0,0,2,1,0,0,0,2,1,5,0,1,2,2,4,0,0,1,0,1,0,0,0,0,3,4,2,0,8,4,1,1,0,1,0,0,5,2,2,1,0,0,0,0,0,0,1,1,1,0,0,0,0,2,0,2,1,0,0,0,1,1,0,0,0,2,0,0,2,3,1,2,0,0,6,5,3,5,0,0,2,2,0,0,4,9,4,1,1,0,4,1,0,1,0,0	25,29,15,13,35,28,106,83,21,22,28,30,18,12,25,29,32,40,8,11,24,22,5,13,54,44,39,31,18,18,41,30,32,33,8,9,28,16,52,60,80,79,19,19,100,86,28,37,37,43,16,20	0,3,0,0,0,0,5,4,1,3,3,2,4,1,1,1,4,0,0,1,1,2,0,0,4,1,0,0,0,2,2,0,5,4,1,1,0,2,3,3,9,3,0,0,6,10,2,2,2,5,0,0	100	50	1.33449e-13	3.04738e-11	0.902,0.952,0.875,1.0,0.818,0.879,1.0,0.84,1.0,1.0,0.833,0.889,1.0,1.0,1.0,1.0,1.0,0.92,0.805,0.885,1.0,1.0,1.0,0.765,0.556,1.0,1.0,1.0,1.0,1.0,0.846,0.895,1.0,0.931,0.846,1.0,1.0,1.0,0.714,1.0,1.0,0.6,1.0,1.0,0.857,1.0,1.0,1.0,0.622,0.84,0.667,1.0,0.75,0.636,1.0,1.0,0.765,1.0,0.867,1.0,1.0,0.846,1.0,1.0,0.923,0.931,1.0,1.0,0.84,0.889,1.0,0.867,1.0,1.0,1.0,1.0,0.917,1.0,1.0,1.0,0.75,1.0,0.75,1.0,…	1.0,0.829,1.0,1.0,1.0,1.0,0.914,0.912,0.913,0.786,0.824,0.882,0.692,0.857,0.926,0.935,0.8,1.0,1.0,0.846,0.923,0.846,1.0,1.0,0.871,0.957,1.0,1.0,1.0,0.818,0.911,1.0,0.762,0.805,0.8,0.818,1.0,0.8,0.897,0.909,0.816,0.929,1.0,1.0,0.893,0.811,0.875,0.902,0.902,0.811,1.0,1.0	0.016
5902	ENSG00000179335	CLK3	chr15	+	74622119	74622216	74619966	74620225	74622493	74622560	5902	61,64,33,34,77,70,48,59,64,75,42,47,57,35,80,65,85,75,106,92,41,38,91,76,38,48,69,79,85,68,51,38,56,44,59,83,41,38,98,74,58,78,38,25,47,47,65,70,66,44,73,49,88,86,92,70,40,35,42,42,36,40,52,47,83,80,51,61,106,125,40,43,30,24,41,31,39,37,58,62,73,70,58,62,49,40,40,43,46,55,37,43,50,50,42,22,51,40,15,13,60,93,26,28,27,20,43,50,44,53,68,83,42,27,80,64,73,53,42,50,58,69,66,57,59,65,82,114,49,55,74,72…	1,3,2,1,2,2,1,3,3,5,3,1,0,3,2,0,1,2,0,3,3,0,1,3,4,2,3,3,3,1,6,5,3,2,3,1,3,3,1,1,0,3,1,0,1,0,4,1,3,3,0,0,4,3,1,0,0,2,0,2,3,2,9,7,2,1,2,1,5,4,0,2,1,0,0,4,0,0,0,0,0,0,0,0,2,2,2,2,1,1,2,2,1,2,1,3,0,0,0,0,4,3,0,0,3,2,0,3,4,2,3,2,1,0,4,0,3,1,0,0,0,0,1,1,1,1,0,2,2,4,2,0,1,0,3,1,5,2,2,4,1,3,4,5,0,0,1,1,1,2,1,3,0,2,0,4,0,1,0,0,3,0,3,0,0,0,1,1,0,1,3,1,2,2,1,2,3,2,3,1,5,3,2,3,0,0,1,0,0,0,0,2,2,1,4,4,0,0,6,6	49,58,71,62,26,31,74,80,40,38,67,68,92,59,44,47,82,82,70,66,85,95,83,70,59,67,45,73,70,65,73,92,100,83,70,80,30,26,28,17,43,42,79,64,8,10,35,30,24,31,83,82	0,2,2,5,0,1,9,2,2,0,0,0,7,3,1,2,3,4,2,0,3,0,3,1,2,0,4,2,5,4,0,0,2,3,3,2,1,0,0,4,0,2,5,0,0,1,0,0,4,2,3,1	100	50	5.55112e-16	1.64548e-13	0.968,0.914,0.892,0.944,0.951,0.946,0.96,0.908,0.914,0.882,0.875,0.959,1.0,0.854,0.952,1.0,0.977,0.949,1.0,0.939,0.872,1.0,0.978,0.927,0.826,0.923,0.92,0.929,0.934,0.971,0.81,0.792,0.903,0.917,0.908,0.976,0.872,0.864,0.98,0.974,1.0,0.929,0.95,1.0,0.959,1.0,0.89,0.972,0.917,0.88,1.0,1.0,0.917,0.935,0.979,1.0,1.0,0.897,1.0,0.913,0.857,0.909,0.743,0.77,0.954,0.976,0.927,0.968,0.914,0.94,1.0,0.915,0.…	1.0,0.935,0.947,0.861,1.0,0.939,0.804,0.952,0.909,1.0,1.0,1.0,0.868,0.908,0.957,0.922,0.932,0.911,0.946,1.0,0.934,1.0,0.933,0.972,0.937,1.0,0.849,0.948,0.875,0.89,1.0,1.0,0.962,0.933,0.921,0.952,0.938,1.0,1.0,0.68,1.0,0.913,0.888,1.0,1.0,0.833,1.0,1.0,0.75,0.886,0.933,0.976	0.006
6016	ENSG00000129007	CALML4	chr15	-	68199540	68199681	68197439	68197628	68205120	68205151	6016	38,53,17,11,17,16,21,20,11,13,14,16,17,14,9,25,10,10,4,7,15,15,9,4,10,9,7,8,10,11,29,26,23,15,14,26,21,25,18,17,17,18,9,10,9,13,4,7,14,14,5,10,11,13,3,4,9,5,12,10,5,18,0,2,16,13,13,12,26,22,22,23,4,7,5,2,5,9,7,6,14,11,8,7,11,8,22,12,3,3,21,20,13,11,4,8,41,32,3,8,20,18,3,15,7,3,5,8,16,15,20,21,4,8,11,6,17,10,8,10,9,12,16,20,14,12,12,13,21,19,21,23,24,19,11,15,24,37,11,13,22,23,37,49,14,20,16,12,10…	0,2,1,1,7,5,0,0,0,2,1,0,1,0,0,1,0,4,8,1,1,2,3,3,6,4,9,4,1,2,6,3,0,0,9,7,2,0,4,4,1,1,6,0,0,2,6,6,2,3,2,2,4,4,3,9,6,3,4,0,1,4,4,2,2,4,1,1,8,2,0,2,4,2,0,0,3,4,5,6,6,1,4,0,3,1,0,3,0,1,1,0,5,4,6,3,7,7,1,1,3,8,1,1,3,4,1,1,4,3,7,4,1,2,2,2,4,3,6,4,2,2,0,1,1,0,5,1,4,4,0,1,0,0,1,2,5,4,2,3,0,2,3,1,2,1,11,3,0,3,5,3,4,4,1,2,2,0,1,2,8,3,1,2,1,0,5,4,3,4,6,1,1,1,0,2,2,2,5,6,0,1,0,1,6,0,2,5,1,1,1,4,5,6,6,6,4,3,1,1	8,3,30,31,32,18,75,75,9,11,21,16,11,16,38,40,49,52,14,17,32,34,5,4,18,21,12,20,18,27,46,45,9,16,18,11,21,23,16,20,33,29,34,22,15,10,9,6,14,5,13,11	6,3,1,3,1,1,4,3,5,3,5,4,1,1,1,2,1,3,0,0,1,0,2,2,4,0,2,5,5,5,0,0,9,6,3,0,6,2,3,2,0,2,5,3,3,1,0,0,6,3,2,1	100	50	0.000632267	0.0361454	1.0,0.93,0.895,0.846,0.548,0.615,1.0,1.0,1.0,0.765,0.875,1.0,0.895,1.0,1.0,0.926,1.0,0.556,0.2,0.778,0.882,0.789,0.6,0.4,0.455,0.529,0.28,0.5,0.833,0.733,0.707,0.812,1.0,1.0,0.438,0.65,0.84,1.0,0.692,0.68,0.895,0.9,0.429,1.0,1.0,0.765,0.25,0.368,0.778,0.7,0.556,0.714,0.579,0.619,0.333,0.182,0.429,0.455,0.6,1.0,0.714,0.692,0.0,0.333,0.8,0.619,0.867,0.857,0.619,0.846,1.0,0.852,0.333,0.636,1.0,1.0,0…	0.4,0.333,0.938,0.838,0.941,0.9,0.904,0.926,0.474,0.647,0.677,0.667,0.846,0.889,0.95,0.909,0.961,0.897,1.0,1.0,0.941,1.0,0.556,0.5,0.692,1.0,0.75,0.667,0.643,0.73,1.0,1.0,0.333,0.571,0.75,1.0,0.636,0.852,0.727,0.833,1.0,0.879,0.773,0.786,0.714,0.833,1.0,1.0,0.538,0.455,0.765,0.846	-0.066
6124	ENSG00000140299	BNIP2	chr15	-	59668102	59668138	59663378	59664120	59668891	59668949	6124	62,67,23,31,20,15,53,47,36,24,28,25,35,36,20,29,24,22,34,34,26,41,38,25,63,45,46,43,16,13,83,64,40,31,46,60,84,61,22,26,61,57,21,21,44,37,47,42,23,39,25,28,22,27,30,53,25,36,30,34,42,50,14,10,39,32,28,37,40,43,22,27,18,32,17,18,18,7,42,54,28,37,29,15,5,5,42,57,26,22,25,29,26,27,11,9,7,7,2,5,38,44,16,13,46,34,39,30,23,18,71,61,5,3,34,33,30,29,56,62,28,28,37,39,23,16,63,46,13,16,11,5,8,5,39,49,55,4…	89,112,64,75,69,100,94,80,207,191,81,80,81,69,133,157,112,112,89,85,69,82,98,95,114,112,151,162,105,124,110,104,75,67,81,65,86,112,132,125,202,243,205,244,132,158,105,136,81,84,91,88,127,161,127,112,79,97,113,125,117,139,200,223,76,81,80,70,197,166,79,74,52,70,86,91,95,85,122,113,110,130,129,131,83,75,143,135,156,157,89,86,110,112,31,19,11,7,26,26,97,83,38,43,131,92,116,143,126,123,70,89,6,8,106,…	20,18,61,49,19,16,40,39,61,57,17,21,33,25,70,58,52,55,49,49,57,33,26,32,28,41,30,17,39,41,40,41,32,31,35,30,13,9,8,5,15,21,38,38,4,6,26,14,4,4,40,43	76,70,110,117,33,29,34,38,131,94,56,60,72,71,142,140,55,65,216,184,99,81,169,166,38,37,98,106,105,110,98,83,126,140,97,100,12,8,17,14,38,26,71,74,2,11,53,59,14,15,106,83	86	50	7.00489e-05	0.00496429	0.288,0.258,0.173,0.194,0.144,0.08,0.247,0.255,0.092,0.068,0.167,0.154,0.201,0.233,0.08,0.097,0.111,0.102,0.182,0.189,0.18,0.225,0.184,0.133,0.243,0.189,0.15,0.134,0.081,0.057,0.305,0.264,0.237,0.212,0.248,0.349,0.362,0.24,0.088,0.108,0.149,0.12,0.056,0.048,0.162,0.12,0.207,0.152,0.142,0.213,0.138,0.156,0.091,0.089,0.121,0.216,0.155,0.177,0.134,0.137,0.173,0.173,0.039,0.025,0.23,0.187,0.169,0.235…	0.133,0.13,0.244,0.196,0.251,0.243,0.406,0.374,0.213,0.261,0.15,0.169,0.21,0.17,0.223,0.194,0.355,0.33,0.117,0.134,0.251,0.192,0.082,0.101,0.3,0.392,0.151,0.085,0.178,0.178,0.192,0.223,0.129,0.114,0.173,0.149,0.386,0.395,0.215,0.172,0.187,0.32,0.237,0.23,0.538,0.241,0.222,0.121,0.142,0.134,0.18,0.231	-0.04
6362	ENSG00000137806	NDUFAF1	chr15	-	41394104	41394358	41388447	41388522	41394858	41395044	6362	12,5,10,1,7,13,5,3,4,6,0,7,8,5,3,2,2,7,3,10,5,3,4,11,12,11,4,1,8,4,10,8,3,8,7,8,7,8,7,8,4,4,3,3,8,1,12,8,6,4,13,5,2,13,5,6,4,8,6,2,3,1,3,1,13,5,2,4,14,10,5,6,1,5,5,3,5,2,5,5,3,3,6,2,5,9,11,11,6,8,3,1,13,9,5,5,5,2,1,2,6,7,6,11,8,5,10,8,5,6,3,7,7,4,2,0,5,3,10,5,16,16,13,14,10,10,8,6,5,7,7,8,7,12,7,8,6,5,10,6,3,10,7,7,9,4,7,8,5,9,7,9,7,5,2,5,17,6,3,1,5,10,6,5,4,10,8,6,1,4,3,1,2,3,2,4,3,9,4,5,6,5,5,8…	25,28,6,7,7,5,9,8,9,12,16,18,11,9,8,10,11,26,16,16,27,22,16,16,17,14,17,16,12,9,14,7,16,13,20,12,19,22,10,14,20,21,24,16,10,6,16,12,13,19,8,16,22,22,18,12,11,22,9,14,19,12,1,0,14,23,5,8,50,77,13,8,8,10,16,15,14,15,14,23,21,12,37,27,21,20,16,17,31,17,12,10,27,18,8,8,11,13,6,4,19,12,8,7,6,13,9,20,10,7,11,14,22,16,11,14,15,16,28,30,22,14,45,31,12,4,21,16,27,26,45,46,20,17,7,13,17,23,21,29,18,17,23,1…	8,5,1,2,9,4,8,9,3,2,2,2,3,5,8,6,4,10,7,3,11,6,4,5,2,4,7,3,7,7,7,3,6,7,7,1,5,12,5,3,8,5,5,6,9,5,3,1,6,4,9,14	18,33,23,25,14,32,40,30,16,11,28,23,15,15,18,18,15,22,25,23,31,20,12,10,15,11,22,33,19,20,26,22,31,35,16,16,18,16,16,17,21,15,12,24,15,10,21,18,28,26,15,13	100	50	0.000209146	0.0134324	0.194,0.082,0.455,0.067,0.333,0.565,0.217,0.158,0.182,0.2,0.0,0.163,0.267,0.217,0.158,0.091,0.083,0.119,0.086,0.238,0.085,0.064,0.111,0.256,0.261,0.282,0.105,0.03,0.25,0.182,0.263,0.364,0.086,0.235,0.149,0.25,0.156,0.154,0.259,0.222,0.091,0.087,0.059,0.086,0.286,0.077,0.273,0.25,0.188,0.095,0.448,0.135,0.043,0.228,0.122,0.2,0.154,0.154,0.25,0.067,0.073,0.04,0.6,1.0,0.317,0.098,0.167,0.2,0.123,0.0…	0.182,0.07,0.021,0.038,0.243,0.059,0.091,0.13,0.086,0.083,0.034,0.042,0.091,0.143,0.182,0.143,0.118,0.185,0.123,0.061,0.151,0.13,0.143,0.2,0.062,0.154,0.137,0.043,0.156,0.149,0.119,0.064,0.088,0.091,0.179,0.03,0.122,0.273,0.135,0.081,0.16,0.143,0.172,0.111,0.231,0.2,0.067,0.027,0.097,0.071,0.231,0.35	0.049
6429	ENSG00000140319	SRP14	chr15	-	40037308	40037355	40036985	40037018	40038281	40038394	6429	8,10,2,6,5,8,12,8,10,7,15,13,9,6,8,13,7,4,15,16,15,15,12,13,12,8,4,5,5,4,7,2,3,7,14,13,11,13,0,1,4,9,8,8,2,4,5,7,6,8,5,3,13,11,6,9,7,4,8,16,2,3,20,18,5,2,4,1,12,10,6,5,3,2,2,6,7,7,10,8,7,6,4,1,3,3,6,17,4,4,12,23,9,5,6,6,8,4,2,7,11,9,0,0,7,1,6,10,9,10,22,18,4,12,6,6,8,9,10,16,15,14,5,12,3,4,11,14,5,9,5,7,8,8,5,5,14,15,3,8,14,14,15,14,8,6,10,2,5,7,4,7,4,7,9,12,8,4,8,3,18,16,5,13,5,3,10,3,4,0,4,5,14…	272,290,166,162,204,187,296,328,240,250,288,298,256,276,273,240,255,275,304,361,307,342,190,193,357,349,217,259,209,187,337,326,240,235,317,296,240,254,268,265,268,296,307,308,222,238,233,227,375,346,180,209,264,257,278,263,206,225,225,240,215,160,278,257,259,285,236,215,415,420,223,223,138,149,188,175,279,243,195,209,247,230,255,241,236,223,247,231,222,250,271,289,193,192,234,229,221,230,167,162…	9,6,3,6,2,4,7,7,10,4,10,4,7,18,10,17,9,1,3,3,7,6,4,4,9,3,4,6,3,7,5,5,4,5,7,5,10,12,7,7,5,3,11,6,1,0,2,1,6,11,1,3	265,253,251,217,248,219,448,405,265,242,223,219,363,360,287,297,370,367,286,314,301,316,201,209,335,268,428,423,255,242,313,345,342,338,340,279,267,255,261,274,231,257,299,263,103,93,330,355,257,248,289,275	97	50	9.00281e-11	1.47627e-08	0.015,0.017,0.006,0.019,0.012,0.022,0.02,0.012,0.021,0.014,0.026,0.022,0.018,0.011,0.015,0.027,0.014,0.007,0.025,0.022,0.025,0.022,0.032,0.034,0.017,0.012,0.009,0.01,0.012,0.011,0.011,0.003,0.006,0.015,0.022,0.022,0.023,0.026,0.0,0.002,0.008,0.015,0.013,0.013,0.005,0.009,0.011,0.016,0.008,0.012,0.014,0.007,0.025,0.022,0.011,0.017,0.017,0.009,0.018,0.033,0.005,0.01,0.036,0.035,0.01,0.004,0.009,0.0…	0.017,0.012,0.006,0.014,0.004,0.009,0.008,0.009,0.019,0.008,0.023,0.009,0.01,0.025,0.018,0.029,0.012,0.001,0.005,0.005,0.012,0.01,0.01,0.01,0.014,0.006,0.005,0.007,0.006,0.015,0.008,0.007,0.006,0.008,0.011,0.009,0.019,0.024,0.014,0.013,0.011,0.006,0.019,0.012,0.005,0.0,0.003,0.001,0.012,0.022,0.002,0.006	0.005
6613	ENSG00000268400	AC008763.2	chr19	+	7630572	7630659	7629811	7629860	7630822	7630846	6613	445,461,349,346,409,432,616,547,379,345,689,703,624,637,471,443,506,519,932,1011,522,473,393,384,689,674,485,447,304,277,640,689,531,513,453,444,601,624,589,620,487,460,569,658,300,311,351,314,473,440,354,397,286,226,603,593,795,755,726,641,405,374,777,788,852,781,452,512,824,746,520,534,361,257,636,610,929,833,407,506,798,851,446,430,539,537,571,542,589,571,520,546,390,371,1135,1000,763,716,431,…	7,5,4,2,4,2,6,11,6,3,10,4,2,3,1,2,6,4,13,11,15,18,3,4,6,10,7,7,5,1,10,9,5,5,8,2,3,5,8,3,3,9,10,9,5,4,2,2,0,2,5,5,1,2,17,5,10,8,2,8,1,0,64,67,4,8,5,3,9,8,6,2,5,2,10,13,7,6,1,7,6,9,3,1,11,2,5,8,3,4,15,9,5,11,18,29,10,6,4,0,14,12,0,1,6,9,4,4,8,13,2,4,17,14,3,4,11,8,1,11,5,4,2,4,7,8,3,7,7,22,2,6,12,4,2,8,3,2,2,5,6,10,6,6,2,3,3,4,4,0,2,7,4,4,5,0,5,2,2,2,10,4,6,14,4,8,8,4,4,9,4,4,10,8,5,5,3,4,10,8,13,1…	1.02699e+169	3,1,4,3,7,6,3,2,11,5,3,8,2,4,10,5,3,0,6,11,2,0,4,2,5,5,5,11,5,6,2,11,20,21,2,1,3,7,12,11,12,7,6,12,16,9,9,6,4,11,5,4	100	50	2.1947e-09	3.10359e-07	0.969,0.979,0.978,0.989,0.981,0.991,0.981,0.961,0.969,0.983,0.972,0.989,0.994,0.991,0.996,0.991,0.977,0.985,0.973,0.979,0.946,0.929,0.985,0.98,0.983,0.971,0.972,0.97,0.968,0.993,0.97,0.975,0.982,0.981,0.966,0.991,0.99,0.984,0.974,0.99,0.988,0.962,0.966,0.973,0.968,0.975,0.989,0.987,1.0,0.991,0.973,0.975,0.993,0.983,0.947,0.983,0.975,0.979,0.995,0.976,0.995,1.0,0.859,0.855,0.991,0.98,0.978,0.988,0…	0.994,0.998,0.981,0.983,0.982,0.985,0.995,0.997,0.972,0.986,0.991,0.975,0.993,0.985,0.976,0.986,0.992,1.0,0.977,0.96,0.995,1.0,0.981,0.991,0.988,0.989,0.991,0.982,0.983,0.98,0.996,0.977,0.974,0.971,0.993,0.996,0.992,0.982,0.976,0.979,0.97,0.98,0.984,0.971,0.976,0.986,0.986,0.991,0.993,0.981,0.988,0.991	-0.006
6700	ENSG00000126214	KLC1	chr14	+	103684985	103685036	103679383	103679545	103687080	103687211	6700	10,7,1,2,16,3,17,9,18,8,11,8,7,10,12,9,9,11,11,9,14,8,18,12,11,12,4,5,16,11,8,6,3,6,9,14,2,5,13,12,9,8,8,8,10,6,8,12,16,5,12,11,14,9,11,7,5,9,9,8,9,8,1,2,13,6,7,5,15,12,12,4,3,5,5,15,9,9,7,9,6,4,7,5,18,18,11,14,3,6,9,10,10,11,13,13,15,11,7,4,12,15,11,8,12,3,5,10,10,6,9,7,15,11,5,6,10,2,6,7,12,13,9,10,9,4,9,6,15,10,15,11,15,14,15,11,15,10,8,7,15,17,3,8,7,9,9,3,12,4,12,6,7,5,6,14,18,11,4,9,12,11,13…	19,15,10,13,25,20,10,14,14,20,19,15,7,18,21,14,16,11,15,25,20,14,30,21,24,24,23,22,11,21,25,7,14,5,28,13,9,13,14,12,22,14,13,16,17,18,21,21,22,11,20,18,32,26,16,12,18,19,15,15,11,18,2,1,15,20,10,8,18,16,16,17,6,6,13,5,10,11,18,18,9,12,18,14,25,26,16,8,22,24,9,14,15,27,13,16,30,23,2,6,13,20,10,9,6,16,12,11,15,14,12,14,17,17,9,15,12,17,9,16,19,18,15,19,16,11,17,13,23,33,26,29,24,20,12,21,21,19,25,1…	16,16,11,20,19,19,30,23,9,5,14,19,16,7,20,13,22,11,10,10,14,11,20,12,13,21,12,16,17,9,16,15,17,20,13,20,22,12,16,15,10,8,13,13,9,15,14,25,22,22,18,21	22,19,25,28,27,17,28,28,10,10,19,19,20,10,17,11,23,30,20,17,9,9,29,21,22,15,22,17,26,21,44,41,35,34,30,31,21,12,32,19,22,24,22,13,18,17,17,22,26,25,26,26	100	50	0.000702373	0.0396571	0.208,0.189,0.048,0.071,0.242,0.07,0.459,0.243,0.391,0.167,0.224,0.211,0.333,0.217,0.222,0.243,0.22,0.333,0.268,0.153,0.259,0.222,0.231,0.222,0.186,0.2,0.08,0.102,0.421,0.208,0.138,0.3,0.097,0.375,0.138,0.35,0.1,0.161,0.317,0.333,0.17,0.222,0.235,0.2,0.227,0.143,0.16,0.222,0.267,0.185,0.231,0.234,0.179,0.148,0.256,0.226,0.122,0.191,0.231,0.211,0.29,0.182,0.2,0.5,0.302,0.13,0.259,0.238,0.294,0.273…	0.267,0.296,0.18,0.263,0.26,0.358,0.349,0.291,0.31,0.2,0.269,0.333,0.286,0.259,0.37,0.371,0.324,0.155,0.2,0.227,0.438,0.379,0.256,0.222,0.228,0.412,0.214,0.32,0.246,0.176,0.154,0.155,0.195,0.227,0.178,0.244,0.344,0.333,0.2,0.283,0.185,0.143,0.228,0.333,0.2,0.306,0.292,0.362,0.297,0.306,0.257,0.288	-0.03
6903	ENSG00000183648	NDUFB1	chr14	-	92118848	92118966	92117497	92117642	92121641	92121724	6903	1,2,11,10,22,26,11,6,25,27,0,0,19,15,7,14,0,0,2,3,15,10,2,1,18,15,32,13,5,1,6,9,8,10,0,0,21,16,12,15,5,6,11,2,10,10,9,10,14,20,10,11,11,9,8,0,3,14,3,6,5,6,5,4,2,2,1,3,22,18,10,14,3,2,7,9,7,7,4,5,1,0,13,10,34,22,5,3,5,0,8,10,9,5,2,3,22,15,0,5,24,25,7,1,0,1,1,4,11,10,7,8,31,28,0,1,5,1,15,24,6,13,33,38,2,9,32,38,7,8,53,35,30,38,10,16,5,1,1,0,15,8,3,2,27,21,6,1,11,15,12,12,10,13,24,14,45,31,12,22,26,…	223,216,235,218,267,278,249,222,265,288,267,270,247,222,215,207,201,204,374,369,276,255,217,245,370,405,262,289,142,181,299,338,235,221,240,263,322,308,284,234,346,355,383,370,271,273,263,235,284,290,205,231,228,279,326,334,385,385,328,278,259,291,238,228,314,308,236,254,670,595,337,340,171,164,274,289,471,424,276,270,332,340,307,302,402,414,245,266,348,315,380,423,328,318,344,317,425,384,323,299…	5,17,33,28,24,12,22,18,12,14,21,15,18,11,16,18,20,12,12,31,28,23,27,15,152,112,30,46,34,22,9,12,12,13,16,11,11,26,10,5,3,7,24,21,37,57,4,18,8,9,66,71	5.51554e+155	100	50	3.57381e-13	7.70443e-11	0.002,0.005,0.023,0.022,0.04,0.045,0.022,0.013,0.045,0.045,0.0,0.0,0.037,0.033,0.016,0.033,0.0,0.0,0.003,0.004,0.026,0.019,0.005,0.002,0.024,0.018,0.058,0.022,0.017,0.003,0.01,0.013,0.017,0.022,0.0,0.0,0.032,0.025,0.021,0.031,0.007,0.008,0.014,0.003,0.018,0.018,0.017,0.021,0.024,0.033,0.024,0.023,0.024,0.016,0.012,0.0,0.004,0.018,0.005,0.011,0.01,0.01,0.01,0.009,0.003,0.003,0.002,0.006,0.016,0.01…	0.005,0.015,0.046,0.041,0.019,0.01,0.019,0.018,0.014,0.018,0.028,0.023,0.036,0.021,0.018,0.023,0.021,0.015,0.012,0.036,0.031,0.026,0.043,0.025,0.217,0.202,0.024,0.04,0.051,0.033,0.008,0.012,0.01,0.013,0.023,0.015,0.012,0.028,0.011,0.005,0.004,0.008,0.036,0.032,0.031,0.051,0.005,0.025,0.009,0.01,0.069,0.074	-0.011
6932	ENSG00000133943	DGLUCY	chr14	+	91223678	91223795	91215404	91215556	91224683	91224822	6932	26,22,9,16,70,67,13,13,26,27,18,16,23,17,28,22,26,15,23,9,12,17,44,43,22,24,39,37,34,38,18,19,41,18,28,34,23,21,29,17,19,9,8,3,17,12,30,37,22,18,26,32,42,44,17,22,3,8,14,15,11,12,18,9,33,35,26,19,56,41,5,13,12,8,11,12,11,12,22,25,27,20,23,13,32,26,12,21,23,30,17,7,43,51,10,21,30,21,0,2,9,18,21,20,7,6,16,13,25,32,48,27,13,24,17,32,23,15,41,36,38,42,26,34,41,43,39,18,32,30,39,33,22,27,18,17,25,34,2…	56,34,26,14,30,35,21,20,24,18,29,22,14,16,22,16,9,12,30,25,33,27,9,12,32,16,12,18,9,7,27,31,28,20,32,19,28,22,37,28,19,10,1,5,15,9,27,25,32,25,20,22,16,23,22,26,12,13,10,14,17,13,13,11,39,29,37,20,42,47,11,16,15,11,14,17,14,11,19,9,27,21,20,10,7,16,15,11,23,19,13,19,12,11,26,18,23,20,9,10,36,34,4,8,9,17,13,14,29,13,43,42,38,53,17,27,45,27,26,28,30,31,7,16,19,17,25,32,31,48,20,34,23,13,12,19,35,33…	19,7,28,33,27,30,12,20,23,22,27,26,24,21,18,14,35,22,8,8,25,24,29,16,42,29,14,12,41,45,22,22,3,10,34,38,14,19,29,35,38,45,36,43,9,6,5,1,9,13,35,41	42,38,22,17,13,13,48,21,46,46,19,29,35,35,35,29,51,51,13,14,33,35,13,16,61,61,28,35,61,62,22,32,18,7,31,20,24,31,21,27,45,36,60,40,11,4,1,6,21,19,34,38	100	50	2.27848e-05	0.00173008	0.188,0.244,0.148,0.364,0.538,0.489,0.236,0.245,0.351,0.429,0.237,0.267,0.451,0.347,0.389,0.407,0.591,0.385,0.277,0.153,0.154,0.239,0.71,0.642,0.256,0.429,0.619,0.507,0.654,0.731,0.25,0.235,0.423,0.31,0.304,0.472,0.291,0.323,0.282,0.233,0.333,0.31,0.8,0.231,0.362,0.4,0.357,0.425,0.256,0.265,0.394,0.421,0.568,0.489,0.279,0.297,0.111,0.235,0.412,0.349,0.244,0.316,0.409,0.29,0.297,0.376,0.26,0.322,0…	0.184,0.084,0.389,0.493,0.509,0.536,0.111,0.323,0.2,0.193,0.415,0.31,0.255,0.231,0.205,0.194,0.255,0.177,0.235,0.222,0.275,0.255,0.527,0.333,0.256,0.192,0.2,0.146,0.252,0.266,0.333,0.256,0.077,0.417,0.354,0.487,0.226,0.235,0.408,0.393,0.297,0.385,0.231,0.35,0.29,0.429,0.714,0.077,0.176,0.255,0.34,0.35	0.061
7096	ENSG00000170345	FOS	chr14	+	75280559	75280667	75279642	75280128	75280782	75281684	7096	1558,1768,2008,1989,1008,962,4634,4561,2544,2461,7309,7131,1042,1002,5210,4982,466,461,795,781,1295,1289,1386,1300,3376,3292,2205,2302,5253,4901,1820,1706,3133,3080,1845,1857,2598,2688,6466,6238,3006,2910,1244,1175,3981,3915,3145,3169,606,598,4282,4248,972,925,2741,2666,1063,1039,1155,1263,983,962,1282,1275,558,588,7135,7215,6304,5825,498,530,1138,1124,2592,2522,1094,1053,1451,1432,1001,1010,459,…	10,16,33,10,6,14,36,21,11,5,35,51,4,16,26,35,3,4,10,8,5,4,8,7,21,12,5,9,24,32,9,19,53,76,2,6,49,24,119,76,73,63,2,2,30,43,6,18,7,6,42,35,11,11,24,32,20,18,13,29,2,3,10,5,4,2,23,32,32,63,17,11,7,4,73,75,49,58,88,51,58,58,39,21,47,43,156,120,58,53,33,29,10,4,21,12,15,9,0,2,27,49,2,7,7,2,8,5,7,5,2,3,0,0,14,16,0,2,16,18,2,5,3,5,14,9,24,23,8,11,19,15,2,5,7,6,11,6,8,14,1,7,20,15,17,30,6,11,15,11,29,40,…	7.71693e+182	11,8,48,43,6,9,2,0,103,74,12,6,5,0,10,8,16,9,2,1,8,3,41,58,5,7,16,18,38,42,10,11,18,8,18,18,7,8,0,1,15,15,16,15,2,7,3,6,5,2,26,19	100	50	0	0	0.987,0.982,0.968,0.99,0.988,0.972,0.985,0.991,0.991,0.996,0.991,0.986,0.992,0.969,0.99,0.986,0.987,0.983,0.975,0.98,0.992,0.994,0.989,0.989,0.988,0.993,0.995,0.992,0.991,0.987,0.99,0.978,0.967,0.953,0.998,0.994,0.964,0.982,0.964,0.976,0.954,0.958,0.997,0.997,0.985,0.979,0.996,0.989,0.977,0.98,0.981,0.984,0.978,0.977,0.983,0.977,0.964,0.967,0.978,0.956,0.996,0.994,0.985,0.992,0.986,0.993,0.994,0.…	0.972,0.977,0.984,0.985,0.964,0.945,0.991,1.0,0.974,0.981,0.98,0.99,0.992,1.0,0.99,0.992,0.972,0.984,0.988,0.993,0.96,0.983,0.987,0.982,0.962,0.939,0.97,0.963,0.981,0.98,0.991,0.991,0.991,0.996,0.982,0.981,0.98,0.975,1.0,0.987,0.967,0.969,0.982,0.983,0.982,0.94,0.984,0.966,0.988,0.995,0.976,0.982	-0.013
7106	ENSG00000187116	LILRA5	chr19	-	54312334	54312370	54311863	54312148	54312536	54312621	7106	589,607,260,233,403,454,230,252,665,671,177,191,159,185,395,424,408,441,444,443,145,135,242,232,278,243,286,267,436,456,243,246,184,203,382,394,146,139,187,165,172,149,192,220,193,211,348,302,285,296,198,186,434,401,230,195,372,355,174,159,438,432,84,60,357,268,89,121,451,444,196,213,85,92,498,514,937,934,220,183,962,972,337,383,452,411,230,220,146,155,359,345,77,84,277,307,338,356,473,453,399,39…	30,36,14,13,36,29,3,9,5,7,6,20,16,13,10,11,11,13,8,7,12,11,6,4,32,24,28,36,5,15,26,23,9,6,14,11,4,14,23,20,14,15,9,8,10,12,25,29,4,10,14,21,27,29,12,10,33,27,11,8,33,36,86,74,9,6,5,3,54,39,9,15,5,6,29,23,102,94,18,17,63,57,17,14,16,19,4,8,11,14,46,48,3,7,63,58,19,20,35,44,23,17,10,3,6,9,29,33,44,31,30,20,33,26,8,9,14,29,8,10,23,16,22,14,12,10,45,30,29,18,20,9,3,5,3,1,9,7,14,16,10,7,15,13,5,10,21,…	9.40901e+171	40,31,5,4,34,36,21,22,69,67,18,15,7,9,29,22,19,11,13,12,23,28,29,18,9,8,24,31,55,38,54,47,79,57,6,8,11,18,28,34,39,39,14,25,5,2,58,53,21,11,22,17	86	50	0	0	0.919,0.907,0.915,0.912,0.867,0.901,0.978,0.942,0.987,0.982,0.945,0.847,0.852,0.892,0.958,0.957,0.956,0.952,0.97,0.974,0.875,0.877,0.959,0.971,0.835,0.855,0.856,0.812,0.981,0.946,0.845,0.861,0.922,0.952,0.941,0.954,0.955,0.852,0.825,0.827,0.877,0.852,0.925,0.941,0.918,0.911,0.89,0.858,0.976,0.945,0.892,0.837,0.903,0.889,0.918,0.919,0.868,0.884,0.902,0.92,0.885,0.875,0.362,0.32,0.958,0.963,0.912,0…	0.932,0.944,0.984,0.988,0.928,0.927,0.954,0.949,0.85,0.848,0.931,0.943,0.939,0.919,0.964,0.974,0.951,0.971,0.988,0.988,0.965,0.961,0.93,0.957,0.938,0.945,0.953,0.935,0.884,0.916,0.937,0.94,0.936,0.951,0.991,0.988,0.924,0.877,0.913,0.884,0.958,0.958,0.918,0.854,0.951,0.978,0.951,0.954,0.842,0.905,0.938,0.954	-0.035
7139	ENSG00000285006	AC005280.3	chr14	-	73459033	73459305	73409975	73410068	73462528	73462689	7139	28,21,23,21,93,84,30,31,70,76,33,41,27,23,97,84,41,49,57,53,26,14,99,97,63,49,63,79,105,87,32,29,37,23,57,56,36,24,100,107,84,81,48,42,53,68,88,75,37,36,106,86,95,79,83,79,67,56,73,70,21,20,18,10,81,44,56,48,101,97,52,44,15,21,58,57,21,18,54,43,67,62,67,82,75,80,75,68,111,123,42,39,138,118,29,41,18,23,9,13,44,44,44,39,20,32,39,35,28,33,23,12,25,27,26,23,25,18,42,41,34,29,66,46,85,84,74,65,33,27,1…	19,22,13,14,17,16,13,17,34,24,10,3,18,10,20,28,18,25,15,20,22,13,42,37,29,22,45,34,42,41,21,25,19,11,31,35,25,37,48,46,46,44,19,14,20,18,42,46,20,19,39,35,30,31,43,45,4,4,22,23,12,7,11,17,18,19,24,26,41,37,6,14,11,12,18,16,3,1,54,45,17,9,43,51,2,2,26,23,45,37,11,10,32,26,2,3,1,2,0,0,22,12,15,10,32,25,13,17,32,30,17,27,1,1,28,21,7,11,20,14,8,3,25,33,35,21,29,25,3,1,5,0,1,1,15,19,15,18,11,10,2,1,13…	111,105,114,98,44,33,32,18,17,22,128,108,26,23,114,102,65,67,31,39,170,176,147,134,29,42,68,64,72,89,146,161,171,160,109,117,73,70,71,65,19,21,49,53,40,52,31,38,40,45,133,131	6,0,35,34,4,4,5,0,13,12,20,6,9,8,25,16,14,13,11,12,16,18,47,41,8,2,15,10,28,30,9,12,11,15,21,24,0,0,4,3,1,1,6,6,0,0,0,0,0,1,18,11	100	50	0	0	0.424,0.323,0.469,0.429,0.732,0.724,0.536,0.477,0.507,0.613,0.623,0.872,0.429,0.535,0.708,0.6,0.532,0.495,0.655,0.57,0.371,0.35,0.541,0.567,0.521,0.527,0.412,0.537,0.556,0.515,0.432,0.367,0.493,0.511,0.479,0.444,0.419,0.245,0.51,0.538,0.477,0.479,0.558,0.6,0.57,0.654,0.512,0.449,0.481,0.486,0.576,0.551,0.613,0.56,0.491,0.467,0.893,0.875,0.624,0.603,0.467,0.588,0.45,0.227,0.692,0.537,0.538,0.48,0.…	0.902,1.0,0.62,0.59,0.846,0.805,0.762,1.0,0.395,0.478,0.762,0.9,0.591,0.59,0.695,0.761,0.699,0.72,0.585,0.619,0.842,0.83,0.61,0.62,0.644,0.913,0.694,0.762,0.562,0.597,0.89,0.87,0.886,0.842,0.722,0.709,1.0,1.0,0.899,0.915,0.905,0.913,0.803,0.815,1.0,1.0,1.0,1.0,1.0,0.957,0.787,0.856	-0.166
7227	ENSG00000125952	MAX	chr14	-	65077327	65077428	65075123	65076663	65077912	65078036	7227	56,63,51,57,57,48,60,85,33,23,36,31,65,69,58,61,58,61,61,67,47,53,24,23,71,53,48,40,126,89,64,67,31,22,49,53,47,41,88,84,79,81,31,60,25,26,81,50,66,67,76,74,99,93,81,88,29,29,20,20,87,77,60,37,94,73,50,45,111,75,40,20,10,16,32,42,31,35,112,92,33,33,40,42,29,34,73,73,43,60,21,16,50,63,15,14,18,11,14,9,52,58,24,34,47,52,81,68,71,74,91,76,7,6,48,37,28,24,61,57,64,49,86,92,41,54,67,67,27,22,71,53,6,7…	123,150,71,78,51,46,91,105,89,78,82,84,89,90,57,78,60,77,117,100,82,76,30,38,74,53,54,71,90,76,118,114,89,88,73,104,72,58,75,91,65,61,50,52,52,60,63,61,135,131,74,73,56,50,54,60,28,41,57,71,60,84,49,58,90,81,66,79,112,112,32,50,44,36,54,56,64,57,58,47,66,64,38,46,42,30,63,55,76,74,39,33,26,30,25,21,16,25,23,15,98,108,10,15,44,36,50,57,48,66,99,96,8,7,125,94,91,81,66,62,66,77,62,58,40,48,63,81,29,…	27,28,59,66,23,17,44,37,51,57,44,35,55,42,44,55,44,44,52,40,30,32,33,45,41,19,12,32,79,63,26,24,7,12,50,49,22,24,21,22,21,15,40,23,2,8,19,13,14,16,47,48	28,39,101,91,28,30,77,73,87,73,43,53,121,93,163,142,105,112,108,103,55,48,91,102,75,69,57,58,97,92,84,73,51,72,61,72,17,21,21,26,39,44,84,73,6,5,31,24,20,15,77,76	100	50	6.20344e-10	9.42067e-08	0.185,0.174,0.264,0.268,0.358,0.343,0.248,0.288,0.156,0.128,0.18,0.156,0.267,0.277,0.337,0.281,0.326,0.284,0.207,0.251,0.223,0.259,0.286,0.232,0.324,0.333,0.308,0.22,0.412,0.369,0.213,0.227,0.148,0.111,0.251,0.203,0.246,0.261,0.37,0.316,0.378,0.399,0.237,0.366,0.194,0.178,0.391,0.291,0.196,0.204,0.339,0.336,0.469,0.482,0.429,0.423,0.341,0.261,0.149,0.123,0.42,0.314,0.38,0.242,0.343,0.311,0.275,0.…	0.325,0.264,0.226,0.266,0.291,0.221,0.222,0.202,0.227,0.281,0.338,0.248,0.185,0.184,0.119,0.162,0.173,0.164,0.194,0.163,0.214,0.25,0.153,0.181,0.215,0.121,0.095,0.216,0.289,0.255,0.134,0.141,0.064,0.077,0.291,0.254,0.393,0.364,0.333,0.297,0.212,0.146,0.192,0.136,0.143,0.444,0.235,0.213,0.259,0.348,0.234,0.24	0.06
7296	ENSG00000197249	SERPINA1	chr14	-	94388559	94388660	94382591	94383241	94390456	94390662	7296	441,485,75,68,259,300,111,128,392,369,92,94,113,132,221,229,269,318,269,280,77,85,188,201,196,167,392,396,385,379,139,129,162,148,275,231,160,152,374,404,223,225,60,54,126,133,360,338,214,206,153,184,345,342,287,324,110,106,123,104,108,143,88,72,299,318,151,163,131,149,197,205,131,119,159,170,109,120,195,193,238,229,224,216,266,196,161,180,198,208,177,160,202,188,64,61,136,125,20,18,172,159,157,1…	421,473,143,131,96,97,140,142,137,129,107,108,150,135,142,145,105,152,148,179,86,87,39,49,121,110,133,125,81,90,84,73,183,148,177,150,106,88,320,357,129,171,70,60,92,116,219,195,115,132,110,109,100,78,240,221,112,116,111,109,78,83,127,114,287,244,113,109,250,253,117,97,117,125,175,203,113,130,183,161,292,269,79,81,40,47,73,58,124,111,217,195,85,84,99,116,70,60,18,23,205,206,96,95,58,61,220,211,25…	107,114,506,507,139,158,268,227,173,165,80,86,197,181,410,428,348,329,622,620,398,410,319,350,71,59,316,272,213,236,214,221,436,413,792,719,31,26,124,101,327,316,65,56,1,7,149,153,65,87,309,322	226,244,292,297,63,75,466,471,285,252,340,360,267,255,282,307,472,483,420,402,608,586,527,478,260,242,418,416,356,338,566,512,463,447,304,324,94,79,66,88,270,256,294,236,17,21,184,188,90,84,256,263	100	50	1.51457e-12	3.07178e-10	0.344,0.339,0.208,0.206,0.574,0.607,0.284,0.311,0.589,0.589,0.301,0.303,0.274,0.328,0.438,0.441,0.562,0.511,0.476,0.439,0.309,0.328,0.707,0.672,0.447,0.432,0.596,0.613,0.704,0.678,0.453,0.469,0.307,0.333,0.437,0.435,0.43,0.463,0.369,0.361,0.464,0.397,0.3,0.31,0.406,0.364,0.451,0.464,0.482,0.438,0.41,0.458,0.633,0.687,0.374,0.423,0.329,0.314,0.357,0.323,0.409,0.463,0.257,0.24,0.342,0.395,0.401,0.4…	0.191,0.189,0.464,0.46,0.525,0.513,0.223,0.194,0.233,0.247,0.105,0.107,0.269,0.262,0.421,0.411,0.269,0.254,0.425,0.435,0.247,0.259,0.232,0.268,0.12,0.109,0.274,0.246,0.23,0.259,0.159,0.178,0.32,0.316,0.566,0.526,0.142,0.141,0.484,0.365,0.377,0.382,0.1,0.106,0.029,0.143,0.288,0.289,0.265,0.341,0.376,0.38	0.099
7329	ENSG00000100578	KIAA0586	chr14	+	58543882	58543967	58540070	58540136	58547780	58548023	7329	0,0,0,2,2,1,2,1,3,2,0,0,4,1,1,1,3,2,1,1,3,1,1,2,9,8,0,3,1,1,1,1,3,1,1,1,2,2,1,0,2,4,0,0,0,0,1,1,2,3,1,0,2,2,1,0,3,2,4,2,3,3,0,1,1,1,3,1,0,5,2,1,2,0,0,1,0,1,5,2,2,2,4,0,0,0,0,0,0,0,3,0,0,0,2,1,1,0,1,1,0,3,0,3,2,0,3,1,1,2,5,1,2,2,3,1,4,6,1,1,3,3,3,5,3,4,1,1,5,3,1,0,1,0,0,0,1,2,0,0,7,6,1,1,2,1,1,9,0,1,3,0,8,2,4,5,1,1,0,1,1,0,2,3,1,3,4,2,2,1,1,0,0,4,8,3,0,0,0,0,4,1,1,1,0,0,3,0,2,2,2,1,0,1,4,6,1,5,3,1	4,7,2,0,2,4,1,2,5,1,5,1,9,6,3,6,2,3,4,5,5,2,2,6,5,3,4,5,4,1,5,11,3,5,6,5,6,13,1,1,8,6,1,4,2,3,4,3,6,7,0,3,1,3,1,7,3,6,8,1,6,4,1,1,6,1,0,3,2,3,0,0,5,2,2,1,3,5,1,10,4,3,3,6,6,1,1,3,3,4,4,2,3,6,2,6,8,2,1,4,4,8,3,0,6,8,3,1,7,5,5,5,8,6,4,2,7,4,3,5,2,2,7,3,3,0,4,1,6,4,3,6,7,3,4,3,1,4,7,4,3,5,3,3,2,2,3,5,7,8,3,4,1,1,5,3,5,4,3,2,2,2,5,4,0,2,1,4,6,4,0,1,5,10,9,5,2,2,6,6,3,14,3,3,3,2,3,4,2,3,5,4,9,6,4,7,7,…	1,6,4,0,0,2,3,2,4,5,3,3,2,4,1,0,4,5,5,2,7,2,3,5,7,1,2,2,4,0,7,4,0,0,5,6,2,1,2,4,3,6,2,1,0,0,1,0,7,5,6,2	4,10,7,2,1,3,6,4,5,9,8,2,7,6,3,4,8,1,6,6,5,8,0,2,2,2,5,4,5,3,1,1,4,6,4,7,6,2,4,3,3,3,1,4,5,5,10,8,5,3,0,5	100	50	1.62073e-05	0.00126171	0.0,0.0,0.0,1.0,0.333,0.111,0.5,0.2,0.231,0.5,0.0,0.0,0.182,0.077,0.143,0.077,0.429,0.25,0.111,0.091,0.231,0.2,0.2,0.143,0.474,0.571,0.0,0.231,0.111,0.333,0.091,0.043,0.333,0.091,0.077,0.091,0.143,0.071,0.333,0.0,0.111,0.25,0.0,0.0,0.0,0.0,0.111,0.143,0.143,0.176,1.0,0.0,0.5,0.25,0.333,0.0,0.333,0.143,0.2,0.5,0.2,0.273,0.0,0.333,0.077,0.333,1.0,0.143,0.0,0.455,1.0,1.0,0.167,0.0,0.0,0.333,0.0,0.09…	0.111,0.231,0.222,0.0,0.0,0.25,0.2,0.2,0.286,0.217,0.158,0.429,0.125,0.25,0.143,0.0,0.2,0.714,0.294,0.143,0.412,0.111,1.0,0.556,0.636,0.2,0.167,0.2,0.286,0.0,0.778,0.667,0.0,0.0,0.385,0.3,0.143,0.2,0.2,0.4,0.333,0.5,0.5,0.111,0.0,0.0,0.048,0.0,0.412,0.455,1.0,0.167	-0.062
7425	ENSG00000165501	LRR1	chr14	+	49607399	49608121	49602369	49602468	49614255	49614671	7425	10,13,6,7,8,7,13,18,7,4,10,9,11,7,6,9,8,14,15,14,11,13,10,8,25,25,6,3,5,2,17,23,10,3,11,9,10,13,7,4,6,9,13,13,5,4,8,2,12,17,8,12,9,9,3,8,8,8,17,14,6,2,5,3,5,7,6,7,17,19,4,8,5,5,7,10,6,12,14,7,5,1,15,9,10,3,6,4,3,3,3,5,10,4,6,4,7,2,5,3,27,18,6,8,10,13,4,8,4,7,18,13,6,9,10,10,13,15,9,16,11,19,20,13,6,6,6,8,9,18,23,14,7,4,8,10,16,11,9,15,19,18,10,11,9,7,11,8,6,11,10,5,3,7,13,8,5,3,5,6,6,11,14,11,8,1…	2,5,2,5,0,0,3,0,2,4,1,4,6,4,1,1,8,1,7,7,3,6,0,0,4,6,3,0,0,1,4,4,5,3,1,4,2,4,1,3,1,1,0,5,2,1,3,4,3,7,3,2,4,2,1,0,0,0,5,5,2,3,3,3,4,1,0,1,16,12,0,3,2,0,3,3,7,9,4,5,4,1,4,2,1,0,2,2,0,0,4,2,0,0,4,6,0,3,5,6,4,7,0,1,2,0,3,2,1,1,2,1,2,0,1,2,7,4,3,8,1,5,3,3,0,0,2,3,1,4,10,8,5,2,4,4,0,0,1,2,12,3,1,1,4,0,0,0,7,5,3,2,1,3,2,2,2,2,2,1,3,4,8,2,2,5,6,2,2,5,2,1,9,11,4,1,2,2,13,14,7,7,1,1,3,3,2,4,2,3,2,1,4,3,7,2,…	7,4,9,12,7,5,27,12,7,13,10,10,10,14,8,9,23,16,10,4,11,13,9,6,17,16,6,14,18,8,7,8,6,6,13,8,7,8,7,5,10,6,11,13,7,22,6,4,12,15,6,7	1,1,1,0,0,1,5,3,1,4,2,0,3,1,3,2,1,2,2,0,1,2,0,1,2,1,3,3,3,2,1,1,7,2,0,2,1,1,0,2,2,3,3,1,2,1,1,4,1,5,1,1	100	50	3.95787e-05	0.00292597	0.714,0.565,0.6,0.412,1.0,1.0,0.684,1.0,0.636,0.333,0.833,0.529,0.478,0.467,0.75,0.818,0.333,0.875,0.517,0.5,0.647,0.52,1.0,1.0,0.758,0.676,0.5,1.0,1.0,0.5,0.68,0.742,0.5,0.333,0.846,0.529,0.714,0.619,0.778,0.4,0.75,0.818,1.0,0.565,0.556,0.667,0.571,0.2,0.667,0.548,0.571,0.75,0.529,0.692,0.6,1.0,1.0,1.0,0.63,0.583,0.6,0.25,0.455,0.333,0.385,0.778,1.0,0.778,0.347,0.442,1.0,0.571,0.556,1.0,0.538,0.…	0.778,0.667,0.818,1.0,1.0,0.714,0.73,0.667,0.778,0.619,0.714,1.0,0.625,0.875,0.571,0.692,0.92,0.8,0.714,1.0,0.846,0.765,1.0,0.75,0.81,0.889,0.5,0.7,0.75,0.667,0.778,0.8,0.3,0.6,1.0,0.667,0.778,0.8,1.0,0.556,0.714,0.5,0.647,0.867,0.636,0.917,0.75,0.333,0.857,0.6,0.75,0.778	-0.093
7613	ENSG00000100938	GMPR2	chr14	+	24238245	24238405	24237519	24237562	24238588	24238748	7613	184,204,109,93,322,263,145,135,290,241,152,145,135,123,171,174,165,186,133,158,156,130,154,148,200,203,276,267,163,168,175,173,167,144,169,179,123,165,161,158,262,227,178,139,232,224,194,187,206,247,129,139,229,172,234,238,197,192,156,149,185,168,45,51,158,167,103,140,307,342,153,130,94,109,184,214,171,137,185,207,297,236,207,189,164,172,154,149,209,187,161,163,171,131,145,146,149,130,39,40,177,1…	9,8,7,8,0,5,3,8,6,9,4,12,1,3,3,3,4,5,5,9,4,5,0,2,6,17,19,20,3,4,7,8,3,1,2,9,7,2,2,2,7,11,6,1,4,5,6,4,2,1,8,3,8,6,9,13,6,5,11,8,6,7,10,6,7,4,12,2,12,22,5,4,5,6,12,8,12,16,2,6,7,12,9,4,2,3,1,2,15,16,10,7,13,5,12,8,5,3,1,1,10,9,2,2,6,11,9,7,12,11,1,4,4,5,6,8,13,9,7,6,2,3,0,5,0,10,7,1,5,0,0,0,0,0,3,4,1,1,1,6,5,5,4,0,2,0,6,3,1,6,4,2,3,5,2,4,1,0,2,2,2,2,13,13,1,1,6,4,8,8,7,10,9,9,2,4,0,1,3,9,10,6,3,6,0…	265,245,277,240,169,145,196,200,216,191,132,145,194,182,228,219,310,284,318,355,295,279,351,324,209,213,213,185,222,232,343,378,261,258,296,325,127,129,108,111,205,169,190,175,64,66,134,105,117,129,291,252	4,3,10,16,5,4,5,16,15,10,4,0,4,12,0,0,3,4,1,0,3,0,6,2,2,3,4,5,5,7,10,9,7,10,7,8,0,1,6,10,8,10,7,4,0,0,1,4,3,2,11,2	100	50	0.000448645	0.0263444	0.911,0.927,0.886,0.853,1.0,0.963,0.96,0.894,0.96,0.931,0.95,0.858,0.985,0.953,0.966,0.967,0.954,0.949,0.93,0.898,0.951,0.929,1.0,0.974,0.943,0.857,0.879,0.87,0.964,0.955,0.926,0.915,0.965,0.986,0.977,0.909,0.898,0.976,0.976,0.975,0.949,0.912,0.937,0.986,0.967,0.957,0.942,0.959,0.981,0.992,0.89,0.959,0.935,0.935,0.929,0.902,0.943,0.95,0.876,0.903,0.939,0.923,0.692,0.81,0.919,0.954,0.811,0.972,0.9…	0.971,0.976,0.933,0.882,0.944,0.948,0.951,0.862,0.878,0.905,0.943,1.0,0.96,0.883,1.0,1.0,0.981,0.973,0.994,1.0,0.98,1.0,0.967,0.988,0.981,0.973,0.964,0.949,0.957,0.943,0.945,0.955,0.949,0.928,0.955,0.953,1.0,0.985,0.9,0.847,0.928,0.894,0.931,0.956,1.0,1.0,0.985,0.929,0.951,0.97,0.93,0.984	-0.013
7616	ENSG00000255526	NEDD8-MDP1	chr14	-	24231651	24231867	24218383	24218431	24232249	24232285	7616	7,4,8,7,8,11,10,7,13,14,6,3,6,11,2,2,8,6,4,6,13,8,11,13,7,7,11,13,7,8,6,7,6,7,3,8,4,7,6,6,6,5,4,3,4,4,4,3,8,10,9,9,11,15,9,4,6,8,4,3,6,8,4,7,7,6,7,5,8,6,14,11,5,3,10,5,4,10,0,6,7,1,3,5,13,11,6,12,10,5,4,8,6,10,7,6,3,1,3,0,7,7,4,4,13,4,5,4,7,7,7,11,8,13,15,8,12,17,13,14,9,5,10,9,8,1,7,6,8,6,11,7,14,5,9,1,13,9,7,5,9,14,7,6,13,9,5,6,3,4,6,9,8,9,6,9,7,13,3,6,9,6,8,12,5,6,10,14,9,7,3,2,17,7,13,13,2,2,…	159,144,102,115,159,170,157,143,172,161,154,120,166,146,127,135,124,143,203,187,165,188,126,114,225,213,140,147,83,107,191,211,138,131,169,150,194,204,151,158,177,187,223,200,170,180,146,135,187,175,113,113,158,152,168,185,214,213,172,176,158,129,106,111,182,161,147,120,311,312,133,151,113,97,154,128,235,220,109,112,191,198,186,209,160,146,143,127,164,160,159,178,143,157,184,164,159,187,124,111,2…	7,4,13,8,13,10,8,18,8,10,14,7,11,6,4,15,16,10,13,16,12,10,14,4,9,11,6,11,9,10,8,15,12,9,11,6,7,7,7,7,7,4,9,11,8,6,5,5,13,12,13,11	3.41307e+155	100	50	0.000254122	0.0159879	0.022,0.014,0.038,0.03,0.025,0.031,0.031,0.024,0.036,0.042,0.019,0.012,0.018,0.036,0.008,0.007,0.031,0.021,0.01,0.016,0.038,0.021,0.042,0.054,0.015,0.016,0.038,0.042,0.04,0.036,0.015,0.016,0.021,0.026,0.009,0.026,0.01,0.017,0.019,0.019,0.017,0.013,0.009,0.007,0.012,0.011,0.014,0.011,0.021,0.028,0.038,0.038,0.034,0.047,0.026,0.011,0.014,0.018,0.011,0.008,0.019,0.03,0.019,0.031,0.019,0.018,0.023,0.…	0.01,0.006,0.035,0.024,0.018,0.013,0.01,0.021,0.015,0.022,0.031,0.015,0.025,0.016,0.008,0.029,0.031,0.019,0.017,0.022,0.022,0.015,0.029,0.007,0.014,0.021,0.008,0.015,0.021,0.026,0.011,0.02,0.013,0.01,0.026,0.014,0.013,0.012,0.015,0.016,0.015,0.008,0.02,0.023,0.014,0.012,0.007,0.006,0.024,0.022,0.026,0.019	0.004
7630	ENSG00000092098	RNF31	chr14	+	24159863	24159960	24158141	24158199	24160238	24160407	7630	117,113,68,59,180,203,85,53,53,74,122,86,87,77,48,67,70,77,150,148,46,71,50,44,72,85,93,74,50,53,81,66,67,92,89,94,46,25,67,54,57,62,24,44,45,40,65,50,123,121,72,76,109,91,74,56,82,96,41,40,86,76,43,36,125,129,71,74,145,165,80,65,47,45,77,84,123,94,67,54,115,117,55,49,61,53,37,34,60,35,68,55,44,33,141,117,340,360,39,48,117,111,78,72,42,40,93,86,86,68,90,92,398,355,89,107,136,141,78,78,164,153,85,…	4,2,1,2,3,2,3,2,4,3,6,9,1,0,3,4,1,1,3,10,0,3,4,1,5,8,4,2,1,3,3,5,1,1,6,6,1,1,3,8,3,4,2,0,7,4,5,6,1,0,8,2,2,2,3,2,4,4,0,1,2,2,2,2,8,11,1,3,18,11,0,4,2,5,7,10,3,3,1,3,11,7,4,3,5,3,1,3,5,2,3,4,2,4,25,17,8,10,0,0,7,1,2,3,0,2,2,1,2,3,1,2,20,13,6,5,10,6,2,2,7,8,0,4,6,2,10,3,13,13,7,2,14,8,5,4,0,1,1,0,7,7,5,3,5,5,6,0,0,0,1,13,5,2,2,2,4,3,1,4,5,3,2,2,8,6,3,4,2,4,4,4,4,1,1,6,7,8,4,7,13,6,4,3,16,17,10,6,7,…	194,181,137,101,399,339,251,271,137,140,163,165,170,166,93,76,204,258,118,156,117,96,79,70,211,213,143,140,107,103,190,171,101,136,124,107,186,206,236,280,383,375,167,143,394,438,128,155,290,243,148,125	6,3,2,3,9,11,3,3,2,2,6,2,6,3,6,1,3,5,2,3,2,1,3,4,3,2,10,6,3,3,4,3,2,2,5,8,3,13,12,4,8,9,10,2,15,12,1,1,8,8,4,6	100	50	4.98656e-08	5.73604e-06	0.936,0.966,0.971,0.937,0.968,0.981,0.934,0.93,0.869,0.925,0.91,0.827,0.978,1.0,0.889,0.893,0.972,0.975,0.962,0.881,1.0,0.922,0.862,0.957,0.878,0.842,0.921,0.949,0.962,0.898,0.931,0.868,0.971,0.979,0.881,0.887,0.958,0.926,0.918,0.771,0.905,0.886,0.857,1.0,0.763,0.833,0.867,0.806,0.984,1.0,0.818,0.95,0.965,0.958,0.925,0.933,0.911,0.923,1.0,0.952,0.956,0.95,0.915,0.9,0.887,0.854,0.973,0.925,0.801,0…	0.942,0.968,0.972,0.944,0.957,0.939,0.977,0.978,0.972,0.972,0.931,0.976,0.934,0.965,0.886,0.974,0.971,0.963,0.967,0.963,0.967,0.98,0.929,0.897,0.972,0.982,0.877,0.921,0.947,0.945,0.96,0.966,0.962,0.971,0.925,0.87,0.969,0.888,0.908,0.972,0.96,0.954,0.893,0.973,0.929,0.948,0.985,0.987,0.948,0.938,0.949,0.912	-0.027
7698	ENSG00000100461	RBM23	chr14	-	22905605	22905659	22905335	22905453	22906194	22906368	7698	125,123,118,90,109,95,128,133,108,104,67,70,60,65,159,159,92,98,77,97,96,82,89,81,127,134,119,120,147,144,83,115,138,130,66,82,127,108,95,106,106,105,86,85,95,97,127,111,123,121,80,84,85,98,139,107,48,52,91,108,60,59,71,55,100,98,73,90,155,159,35,48,52,44,105,99,85,82,143,155,103,89,49,65,95,78,116,71,112,112,47,60,73,99,54,48,30,22,14,22,71,64,46,54,56,64,111,95,56,51,117,101,18,15,87,95,120,100…	14,13,0,0,7,10,0,0,25,16,6,12,12,15,1,0,9,10,12,17,7,8,11,7,0,0,12,17,0,0,6,6,12,7,16,14,1,0,17,18,12,8,4,3,24,15,11,19,6,6,21,21,7,11,8,9,6,5,4,1,7,9,9,13,0,2,8,16,22,17,9,13,3,3,0,0,0,0,4,12,11,6,15,9,2,7,5,6,7,9,4,3,4,2,6,3,0,0,0,1,22,24,0,0,11,16,0,0,20,23,10,12,1,1,20,13,0,1,0,0,4,3,15,20,21,16,26,13,6,3,0,0,0,0,0,3,16,14,7,2,5,10,15,16,0,0,20,13,0,2,5,4,0,0,3,3,12,17,6,4,13,10,4,9,0,0,0,1,7…	73,80,145,115,28,22,56,54,95,101,99,68,104,114,116,110,109,114,106,82,132,118,181,189,70,65,55,40,111,88,99,100,149,116,120,131,17,22,33,23,58,43,126,80,1,3,29,16,22,13,122,110	0,0,11,23,3,4,0,0,11,11,1,4,0,0,4,9,2,8,13,7,6,6,1,0,8,6,4,14,7,11,7,6,0,1,5,5,5,3,0,0,2,3,4,3,0,0,6,1,2,5,1,0	100	50	2.16928e-08	2.62253e-06	0.817,0.826,1.0,1.0,0.886,0.826,1.0,1.0,0.684,0.765,0.848,0.745,0.714,0.684,0.988,1.0,0.836,0.831,0.762,0.74,0.873,0.837,0.802,0.853,1.0,1.0,0.832,0.779,1.0,1.0,0.874,0.906,0.852,0.903,0.673,0.745,0.984,1.0,0.736,0.746,0.815,0.868,0.915,0.934,0.664,0.764,0.852,0.745,0.911,0.91,0.656,0.667,0.859,0.817,0.897,0.856,0.8,0.839,0.919,0.982,0.811,0.766,0.798,0.679,1.0,0.961,0.82,0.738,0.779,0.824,0.66,0…	1.0,1.0,0.868,0.714,0.824,0.733,1.0,1.0,0.812,0.821,0.98,0.895,1.0,1.0,0.935,0.859,0.965,0.877,0.803,0.854,0.917,0.908,0.989,1.0,0.814,0.844,0.873,0.588,0.888,0.8,0.876,0.893,1.0,0.983,0.923,0.929,0.63,0.786,1.0,1.0,0.935,0.878,0.94,0.93,1.0,1.0,0.707,0.889,0.846,0.565,0.984,1.0	-0.041
7841	ENSG00000167613	LAIR1	chr19	-	54360021	54360072	54356711	54356966	54360915	54360949	7841	64,77,21,20,20,14,63,54,26,35,33,32,36,24,48,52,33,36,111,151,57,47,36,30,34,41,17,22,12,18,77,62,61,50,48,43,24,37,18,16,25,13,30,35,6,4,19,25,45,60,48,34,34,28,23,16,32,34,37,27,54,74,14,13,30,30,13,29,28,25,42,17,4,11,14,18,60,32,9,9,45,26,42,47,11,11,29,38,17,12,29,47,19,15,30,31,52,42,22,18,64,71,8,17,28,23,22,26,7,18,12,13,17,17,37,49,35,33,29,17,40,43,31,39,32,31,80,61,63,46,18,25,146,138,…	26,28,15,8,5,7,0,0,3,7,0,0,13,13,0,0,10,5,3,1,3,0,0,0,18,24,0,0,3,3,2,1,0,0,0,0,0,4,1,8,2,6,0,0,19,13,1,0,13,21,2,0,7,9,13,5,0,0,0,0,0,1,0,0,7,4,8,10,9,12,0,0,2,3,1,2,0,0,6,7,0,0,1,1,0,0,0,0,0,1,0,0,0,0,12,11,0,0,0,0,0,1,9,12,0,0,0,0,32,26,12,12,0,0,0,0,1,0,6,4,0,0,0,0,0,0,1,1,0,1,0,0,7,12,6,10,0,1,0,0,0,0,12,13,0,0,7,6,1,0,0,0,1,0,0,0,1,3,13,18,6,8,0,0,0,1,0,0,4,7,9,3,11,6,0,0,0,0,26,18,17,18,8,…	26,18,27,21,24,23,36,26,49,51,23,23,45,36,67,88,96,65,150,156,54,65,65,64,32,47,50,52,39,29,78,73,149,142,59,56,15,15,21,28,57,29,52,24,16,10,118,118,18,25,6,7	0,0,4,10,0,0,53,53,1,1,0,0,0,0,1,0,0,1,0,0,1,0,0,0,9,11,0,0,8,13,1,0,3,7,0,0,7,3,0,2,0,0,2,1,0,0,0,1,0,0,7,10	100	50	1.04141e-05	0.000853845	0.552,0.579,0.412,0.556,0.667,0.5,1.0,1.0,0.812,0.714,1.0,1.0,0.581,0.48,1.0,1.0,0.623,0.783,0.949,0.987,0.905,1.0,1.0,1.0,0.486,0.461,1.0,1.0,0.667,0.75,0.951,0.969,1.0,1.0,1.0,1.0,1.0,0.822,0.9,0.5,0.862,0.52,1.0,1.0,0.136,0.133,0.905,1.0,0.634,0.588,0.923,1.0,0.708,0.609,0.469,0.615,1.0,1.0,1.0,1.0,1.0,0.974,1.0,1.0,0.682,0.789,0.448,0.592,0.609,0.51,1.0,1.0,0.5,0.647,0.875,0.818,1.0,1.0,0.429…	1.0,1.0,0.771,0.512,1.0,1.0,0.254,0.197,0.961,0.962,1.0,1.0,1.0,1.0,0.971,1.0,1.0,0.97,1.0,1.0,0.964,1.0,1.0,1.0,0.64,0.681,1.0,1.0,0.709,0.527,0.975,1.0,0.961,0.91,1.0,1.0,0.517,0.714,1.0,0.875,1.0,1.0,0.929,0.923,1.0,1.0,1.0,0.983,1.0,1.0,0.3,0.259	-0.047
7888	ENSG00000088448	ANKRD10	chr13	-	110894108	110894202	110892691	110893263	110906032	110906124	7888	2,5,2,4,8,7,2,2,8,10,1,5,6,1,3,3,4,2,4,2,9,5,5,4,10,8,11,8,2,4,7,11,0,2,7,4,7,2,0,1,3,8,1,3,1,3,7,2,5,6,2,1,6,5,8,4,2,5,6,3,4,0,11,9,5,9,3,2,18,9,3,1,0,2,2,4,2,3,1,3,2,0,4,2,3,4,4,6,4,9,1,1,3,13,1,3,0,1,6,1,9,5,1,5,6,10,4,7,10,7,5,3,0,1,3,1,5,4,2,7,4,4,4,5,3,3,4,8,4,5,3,0,0,1,6,4,1,2,7,8,12,6,3,4,7,4,2,5,5,3,2,1,10,4,2,6,2,2,5,4,6,4,0,2,1,1,4,3,6,1,7,5,2,5,3,4,2,4,5,2,6,10,5,6,5,2,9,8,5,3,0,2,5,7…	17,20,11,10,13,7,34,19,11,12,23,12,20,28,19,20,16,18,6,22,39,32,16,13,14,22,16,13,13,13,30,27,16,8,18,10,19,8,8,10,23,9,6,10,13,14,14,10,16,16,16,7,18,20,13,14,17,15,21,24,10,16,21,27,18,18,11,10,31,30,7,10,14,14,4,5,5,20,26,23,9,10,18,6,7,1,12,12,7,10,19,14,7,7,7,4,9,7,4,5,9,13,6,1,8,10,12,14,16,18,23,35,3,6,25,29,21,24,20,34,11,14,15,12,13,16,15,20,4,3,6,8,3,2,18,12,14,12,8,3,19,17,18,16,8,14,1…	1,2,1,2,1,6,5,3,4,0,1,1,7,3,2,6,8,0,2,4,0,1,5,4,3,7,4,5,0,3,4,1,0,0,7,6,3,1,2,2,2,2,4,2,3,1,1,2,1,2,2,7	16,14,13,17,4,0,12,14,14,23,15,11,18,26,6,17,13,19,14,7,16,16,14,20,13,27,10,14,14,9,16,7,12,12,9,13,6,9,6,15,11,5,17,24,2,1,7,7,10,7,20,16	100	50	0.000158133	0.0105303	0.056,0.111,0.083,0.167,0.235,0.333,0.029,0.05,0.267,0.294,0.021,0.172,0.13,0.018,0.073,0.07,0.111,0.053,0.25,0.043,0.103,0.072,0.135,0.133,0.263,0.154,0.256,0.235,0.071,0.133,0.104,0.169,0.0,0.111,0.163,0.167,0.156,0.111,0.0,0.048,0.061,0.308,0.077,0.13,0.037,0.097,0.2,0.091,0.135,0.158,0.059,0.067,0.143,0.111,0.235,0.125,0.056,0.143,0.125,0.059,0.167,0.0,0.208,0.143,0.122,0.2,0.12,0.091,0.225,0…	0.03,0.067,0.037,0.056,0.111,1.0,0.172,0.097,0.125,0.0,0.032,0.043,0.163,0.055,0.143,0.15,0.235,0.0,0.067,0.222,0.0,0.03,0.152,0.091,0.103,0.115,0.167,0.152,0.0,0.143,0.111,0.067,0.0,0.0,0.28,0.188,0.2,0.053,0.143,0.062,0.083,0.167,0.105,0.04,0.429,0.333,0.067,0.125,0.048,0.125,0.048,0.179	0.022
8406	ENSG00000133106	EPSTI1	chr13	-	42919299	42919332	42917540	42917624	42926335	42926429	8406	133,131,28,20,311,266,24,32,138,151,16,16,30,30,29,23,29,31,39,45,21,26,43,47,106,128,108,97,1,4,31,19,17,24,62,41,34,57,76,86,106,117,17,10,18,11,11,14,17,22,69,61,74,94,88,64,23,23,26,19,75,67,10,7,73,75,41,57,69,64,58,51,25,35,66,73,29,24,85,83,17,16,33,39,10,5,31,21,45,45,1,3,20,26,15,14,16,5,0,2,34,35,123,137,117,131,167,161,149,162,17,20,8,11,23,24,18,19,93,72,102,103,194,183,10,13,146,150,…	299,314,62,63,319,299,69,71,233,213,44,55,57,73,54,47,76,80,135,146,81,75,79,68,153,160,237,247,11,13,71,77,54,58,98,89,81,85,167,139,165,157,28,27,42,47,31,36,47,54,94,86,147,121,124,143,47,42,38,43,222,207,22,20,163,164,102,93,185,187,111,115,75,59,115,107,74,50,189,187,43,38,90,100,10,18,64,63,72,55,4,2,31,32,57,51,32,35,15,8,104,86,214,200,236,200,263,231,198,197,75,70,25,28,62,60,62,60,195,1…	6,7,1,0,19,18,24,29,1,1,3,0,48,55,0,0,44,35,31,33,1,2,0,2,6,6,0,0,43,46,1,2,0,0,21,9,2,2,1,0,39,42,1,6,2,3,0,0,4,5,2,1	11,4,9,9,46,48,116,87,10,11,2,1,100,109,6,8,89,100,97,100,14,9,5,2,30,17,7,8,104,85,4,8,6,3,38,29,5,6,10,11,62,80,14,16,7,11,1,2,15,12,11,13	83	50	2.23803e-09	3.15041e-07	0.211,0.201,0.214,0.161,0.37,0.349,0.173,0.214,0.263,0.299,0.18,0.149,0.241,0.198,0.244,0.228,0.187,0.189,0.148,0.157,0.135,0.173,0.247,0.294,0.294,0.325,0.215,0.191,0.052,0.156,0.208,0.129,0.159,0.2,0.276,0.217,0.202,0.288,0.215,0.272,0.279,0.31,0.268,0.182,0.205,0.124,0.176,0.19,0.179,0.197,0.307,0.299,0.233,0.319,0.299,0.212,0.228,0.248,0.292,0.21,0.169,0.163,0.215,0.174,0.212,0.216,0.195,0.27…	0.247,0.513,0.063,0.0,0.199,0.184,0.111,0.167,0.057,0.052,0.475,0.0,0.224,0.233,0.0,0.0,0.229,0.174,0.161,0.166,0.041,0.118,0.0,0.376,0.108,0.175,0.0,0.0,0.199,0.246,0.131,0.131,0.0,0.0,0.25,0.158,0.194,0.167,0.057,0.0,0.275,0.24,0.041,0.184,0.147,0.141,0.0,0.0,0.138,0.201,0.099,0.044	0.078
8867	ENSG00000110931	CAMKK2	chr12	-	121248605	121248734	121245139	121245240	121249786	121249874	8867	27,39,27,20,10,17,20,34,29,30,20,8,20,16,31,42,64,61,35,44,18,13,54,55,11,12,59,57,45,46,26,17,40,31,26,39,16,21,70,36,30,27,19,11,25,27,52,41,45,22,33,31,48,38,21,21,26,23,21,20,32,21,8,10,28,26,32,19,43,41,8,8,13,9,15,17,9,17,50,51,56,54,15,15,22,27,31,16,18,19,11,11,17,15,10,9,5,3,10,4,20,19,12,5,11,13,25,18,26,15,30,17,4,1,22,20,6,10,16,14,13,13,22,20,35,31,40,38,9,9,13,13,13,13,32,13,16,13,2…	17,15,13,14,6,8,1,6,10,8,7,14,9,8,7,17,11,24,16,21,9,9,9,16,6,9,28,43,15,17,12,4,16,7,17,16,12,13,48,46,41,47,13,22,16,21,25,24,6,14,12,14,16,16,21,22,13,13,8,8,17,6,18,15,12,11,8,5,34,36,9,11,9,14,12,10,18,18,15,36,36,35,15,13,11,13,16,18,30,13,4,5,6,12,6,2,1,5,1,2,9,13,2,2,7,3,27,22,9,9,10,10,1,3,13,6,3,8,8,6,10,2,16,13,34,32,6,12,7,3,8,7,5,7,10,7,8,3,12,11,9,2,14,9,9,11,10,17,17,11,13,18,8,7,5…	19,13,36,31,12,9,16,10,23,20,27,41,12,13,46,40,34,40,39,45,25,38,52,25,8,14,22,28,44,52,25,42,31,31,35,31,5,7,7,12,31,24,11,19,2,4,8,2,7,1,36,27	9,15,16,14,1,3,2,0,21,22,9,15,3,7,6,9,6,11,8,11,14,13,15,19,5,3,5,11,10,9,10,12,10,13,10,9,1,2,3,4,10,5,7,5,0,0,5,1,3,4,8,14	100	50	7.32883e-05	0.00516104	0.443,0.565,0.509,0.417,0.455,0.515,0.909,0.739,0.592,0.652,0.588,0.222,0.526,0.5,0.689,0.553,0.744,0.56,0.522,0.512,0.5,0.419,0.75,0.632,0.478,0.4,0.513,0.399,0.6,0.575,0.52,0.68,0.556,0.689,0.433,0.549,0.4,0.447,0.422,0.281,0.268,0.223,0.422,0.2,0.439,0.391,0.51,0.461,0.789,0.44,0.579,0.525,0.6,0.543,0.333,0.323,0.5,0.469,0.568,0.556,0.485,0.636,0.182,0.25,0.538,0.542,0.667,0.655,0.387,0.363,0.…	0.514,0.302,0.529,0.525,0.857,0.6,0.8,1.0,0.354,0.312,0.6,0.577,0.667,0.481,0.793,0.69,0.739,0.645,0.709,0.672,0.472,0.594,0.634,0.397,0.444,0.7,0.688,0.56,0.688,0.743,0.556,0.636,0.608,0.544,0.636,0.633,0.714,0.636,0.538,0.6,0.608,0.706,0.44,0.655,1.0,1.0,0.444,0.5,0.538,0.111,0.692,0.491	-0.1
8890	ENSG00000022840	RNF10	chr12	+	120571190	120571291	120566824	120566980	120575630	120575688	8890	281,283,194,177,371,350,186,178,542,565,277,276,187,220,379,365,374,416,351,338,149,141,328,308,253,221,560,599,448,510,257,265,188,173,262,318,239,260,425,347,888,918,564,513,646,581,388,396,238,296,346,317,428,472,598,610,626,589,532,537,533,510,749,653,299,266,314,315,472,438,284,306,202,193,312,288,703,680,617,624,1198,1119,493,500,710,666,423,415,569,538,373,367,529,506,624,608,253,274,214,1…	13,11,7,6,18,13,7,6,11,21,6,8,9,9,7,9,6,14,11,21,8,11,14,11,14,8,30,27,12,6,11,6,7,7,7,14,9,6,18,13,48,43,15,17,29,33,14,12,5,8,13,8,23,18,42,43,26,13,20,12,10,31,64,65,9,13,5,10,18,31,11,13,10,6,11,13,26,16,30,29,32,37,27,26,28,16,16,19,10,14,20,15,13,18,34,30,25,22,1,5,11,12,23,11,26,24,47,30,29,43,8,16,15,9,4,9,15,18,14,14,23,23,40,29,16,18,33,24,15,8,11,14,20,17,12,9,22,13,16,14,17,14,11,2,5,…	7.03678e+159	28,23,13,16,15,11,14,3,20,27,17,9,5,8,7,10,11,13,24,22,27,17,16,18,11,5,19,19,12,7,9,12,13,29,23,19,7,8,5,2,8,12,8,8,1,5,19,22,13,6,18,17	100	50	0	0	0.915,0.928,0.933,0.937,0.912,0.931,0.93,0.937,0.961,0.931,0.958,0.945,0.912,0.924,0.964,0.953,0.969,0.937,0.941,0.889,0.903,0.865,0.921,0.933,0.9,0.932,0.903,0.917,0.949,0.977,0.921,0.957,0.931,0.925,0.949,0.919,0.93,0.956,0.922,0.93,0.902,0.914,0.949,0.938,0.918,0.898,0.933,0.943,0.96,0.949,0.93,0.952,0.903,0.929,0.877,0.876,0.923,0.958,0.93,0.957,0.964,0.892,0.854,0.834,0.943,0.911,0.969,0.94,…	0.926,0.936,0.946,0.93,0.954,0.967,0.92,0.983,0.929,0.911,0.93,0.957,0.961,0.94,0.973,0.96,0.944,0.926,0.956,0.96,0.943,0.962,0.969,0.966,0.912,0.96,0.927,0.923,0.938,0.963,0.974,0.967,0.971,0.935,0.949,0.957,0.955,0.946,0.967,0.986,0.962,0.945,0.938,0.935,0.987,0.922,0.963,0.959,0.92,0.956,0.943,0.941	-0.024
8900	ENSG00000089157	RPLP0	chr12	-	120198553	120198631	120197321	120197462	120198853	120199000	8900	272,322,468,449,220,198,801,841,213,204,928,891,1025,953,297,280,515,556,656,622,999,902,378,362,1016,992,282,230,274,270,806,832,603,683,544,598,458,441,277,278,214,181,259,226,240,215,304,271,937,998,409,387,365,383,295,230,388,415,687,728,322,285,546,510,622,646,389,370,831,814,304,312,162,171,327,325,620,615,271,331,311,351,507,529,220,205,308,282,239,249,907,881,303,283,605,568,1298,1288,557…	7,12,10,8,14,7,18,10,9,5,37,35,34,32,11,23,12,20,52,57,13,18,6,7,10,13,5,14,3,2,25,22,10,12,36,33,20,18,19,15,5,11,27,15,17,24,25,28,83,55,14,20,6,10,0,1,13,10,34,43,11,6,49,46,16,11,27,21,40,16,24,15,2,4,20,19,6,5,7,14,9,4,16,15,6,5,10,7,1,2,27,25,1,0,43,50,2,1,73,74,34,26,2,0,9,9,0,0,0,1,28,38,27,26,11,14,57,60,9,7,25,19,7,14,1,0,6,6,13,8,22,32,32,51,11,15,4,8,32,33,13,16,7,7,12,12,4,5,49,39,5,…	5.16482e+174	44,47,26,25,11,12,117,93,57,72,43,60,45,56,41,50,19,19,22,9,57,56,15,19,29,61,98,109,17,12,40,49,125,129,0,1,51,61,7,5,49,51,38,15,52,37,62,56,24,28,45,50	100	50	0	0	0.951,0.931,0.959,0.966,0.887,0.934,0.957,0.977,0.922,0.953,0.926,0.927,0.938,0.937,0.931,0.859,0.955,0.933,0.863,0.845,0.975,0.962,0.969,0.963,0.981,0.974,0.966,0.891,0.979,0.985,0.942,0.95,0.968,0.966,0.883,0.901,0.92,0.925,0.879,0.903,0.955,0.892,0.827,0.883,0.876,0.817,0.859,0.829,0.85,0.901,0.936,0.906,0.968,0.95,1.0,0.991,0.937,0.954,0.91,0.894,0.936,0.96,0.848,0.847,0.951,0.967,0.878,0.898…	0.854,0.837,0.881,0.886,0.972,0.97,0.884,0.9,0.886,0.856,0.9,0.866,0.93,0.915,0.903,0.883,0.961,0.961,0.855,0.932,0.869,0.859,0.88,0.856,0.949,0.891,0.838,0.826,0.93,0.947,0.879,0.859,0.721,0.713,1.0,0.993,0.912,0.898,0.994,0.996,0.923,0.915,0.937,0.971,0.962,0.972,0.867,0.878,0.967,0.963,0.902,0.894	0.032
8972	ENSG00000105700	KXD1	chr19	+	18560099	18560550	18557897	18557914	18562035	18562157	8972	7,25,8,7,12,14,5,5,11,12,12,10,12,9,9,10,10,6,11,12,9,10,9,9,9,13,19,10,12,10,9,14,8,8,4,16,5,9,19,9,2,8,5,1,7,1,8,8,8,13,8,6,9,12,9,14,6,3,7,9,2,2,5,7,9,17,12,7,29,12,3,4,5,5,8,5,9,2,10,11,3,6,5,5,12,8,4,3,8,19,6,7,7,6,1,10,10,7,3,4,21,16,7,7,4,10,13,11,7,13,28,21,4,3,9,8,7,6,11,17,13,11,8,13,5,16,16,18,19,11,9,16,4,9,9,7,11,16,11,5,8,7,9,9,10,10,5,9,7,4,10,9,6,9,7,6,14,15,2,0,6,8,8,12,5,4,8,7,6…	53,64,28,37,33,31,36,42,25,18,31,33,23,31,15,23,20,30,51,47,29,35,24,15,39,25,33,14,12,26,43,38,37,34,51,50,12,16,28,26,10,11,8,6,25,11,16,15,36,60,9,20,20,22,13,25,17,17,16,11,18,30,17,32,40,48,29,25,42,47,19,13,12,11,22,15,31,29,17,24,31,29,10,14,6,9,14,14,18,16,21,34,12,16,25,35,36,41,23,18,38,26,10,8,7,2,17,17,28,15,64,64,13,8,18,25,39,48,17,26,30,22,16,13,20,30,30,39,21,25,33,39,19,33,22,21,…	11,9,1,5,7,6,11,16,6,10,14,10,13,7,8,8,12,9,11,9,14,6,10,8,14,14,10,9,10,13,3,8,12,3,13,15,8,8,2,8,12,10,11,20,0,1,3,1,11,7,15,10	35,30,32,37,15,18,61,70,54,47,16,21,45,39,50,51,72,57,31,38,51,55,29,28,47,36,34,42,33,33,49,58,38,43,32,38,15,19,28,22,51,44,45,40,11,13,17,21,16,25,38,26	100	50	1.71909e-06	0.000159627	0.062,0.163,0.125,0.086,0.154,0.184,0.065,0.056,0.18,0.25,0.162,0.132,0.207,0.127,0.231,0.179,0.2,0.091,0.097,0.113,0.134,0.125,0.158,0.231,0.103,0.206,0.224,0.263,0.333,0.161,0.095,0.156,0.098,0.105,0.038,0.138,0.172,0.22,0.253,0.148,0.091,0.267,0.238,0.077,0.123,0.043,0.2,0.211,0.1,0.098,0.308,0.13,0.184,0.214,0.257,0.219,0.15,0.081,0.179,0.29,0.053,0.032,0.128,0.099,0.101,0.15,0.171,0.123,0.25…	0.136,0.13,0.015,0.063,0.189,0.143,0.083,0.103,0.053,0.096,0.304,0.192,0.126,0.082,0.074,0.073,0.077,0.073,0.151,0.106,0.121,0.052,0.147,0.125,0.13,0.163,0.128,0.097,0.132,0.165,0.03,0.065,0.136,0.034,0.169,0.165,0.211,0.174,0.034,0.154,0.105,0.102,0.109,0.2,0.0,0.037,0.081,0.023,0.256,0.123,0.165,0.161	0.046
9295	ENSG00000111052	LIN7A	chr12	-	80848098	80848175	80845729	80845939	80848250	80848322	9295	6,9,6,5,10,8,14,5,19,11,7,4,6,8,11,6,10,18,17,19,2,3,8,14,6,6,26,35,14,14,12,14,5,5,8,7,20,8,17,16,32,36,5,13,9,4,20,19,10,7,10,14,5,10,32,36,8,17,9,5,14,13,23,19,5,14,5,10,23,16,10,14,2,9,14,14,10,13,21,21,15,15,8,10,8,10,6,12,14,12,4,1,10,7,4,6,1,4,2,1,14,11,6,12,10,16,12,15,11,8,11,4,1,6,11,13,4,5,11,8,9,4,20,20,14,20,16,9,6,3,4,6,4,2,10,12,15,22,14,17,0,0,5,9,2,6,35,33,7,8,27,23,20,12,14,13,2…	27,28,25,32,52,43,35,17,72,74,22,19,23,28,121,91,39,34,64,86,9,8,38,34,20,25,61,48,63,55,22,33,29,29,25,25,49,52,64,61,67,78,109,99,75,94,69,52,34,46,40,51,44,43,73,85,52,45,20,34,35,41,70,67,34,25,60,40,65,66,42,65,33,27,33,45,62,43,55,46,45,66,44,42,41,49,43,42,80,83,38,39,45,67,47,38,19,17,41,40,44,46,21,23,45,45,87,75,36,44,8,8,6,12,44,36,19,32,27,31,38,55,55,67,63,59,59,60,20,12,30,14,43,27,…	9,9,11,10,1,0,0,2,8,7,5,8,6,4,11,16,3,12,12,7,6,5,6,19,2,8,11,9,19,15,8,18,7,11,20,24,4,5,5,2,5,5,9,5,0,4,4,10,4,0,14,14	62,82,85,75,23,19,19,16,59,36,62,53,25,24,57,59,38,37,105,103,86,98,135,106,25,22,54,47,55,51,71,64,105,149,102,120,30,32,25,22,20,25,38,38,20,13,78,64,17,18,88,91	100	50	0	0	0.1,0.138,0.107,0.072,0.088,0.085,0.167,0.128,0.117,0.069,0.137,0.095,0.115,0.125,0.043,0.032,0.114,0.209,0.117,0.099,0.1,0.158,0.095,0.171,0.13,0.107,0.176,0.267,0.1,0.113,0.214,0.175,0.079,0.079,0.138,0.123,0.169,0.071,0.117,0.116,0.193,0.188,0.022,0.062,0.057,0.021,0.127,0.154,0.128,0.071,0.111,0.121,0.054,0.104,0.18,0.175,0.071,0.159,0.184,0.068,0.167,0.137,0.141,0.124,0.068,0.219,0.04,0.111,…	0.068,0.052,0.061,0.062,0.021,0.0,0.0,0.059,0.063,0.089,0.039,0.07,0.107,0.077,0.088,0.119,0.038,0.14,0.054,0.033,0.034,0.025,0.022,0.082,0.038,0.154,0.092,0.087,0.147,0.128,0.053,0.123,0.032,0.036,0.089,0.091,0.062,0.072,0.091,0.043,0.111,0.091,0.106,0.062,0.0,0.133,0.025,0.072,0.105,0.0,0.074,0.071	0.048
9339	ENSG00000139278	GLIPR1	chr12	+	75487738	75487809	75481833	75482079	75490405	75490518	9339	19,10,5,9,5,3,24,23,4,5,11,14,5,6,22,14,16,9,4,13,10,10,14,16,12,16,6,3,18,12,30,19,14,16,15,21,18,22,26,24,4,5,9,10,14,10,22,6,18,18,12,10,19,15,4,4,1,2,23,16,2,5,3,6,5,7,18,7,28,11,9,5,5,6,6,6,10,6,9,4,4,5,13,18,9,3,20,15,7,13,9,17,14,17,7,2,4,2,1,0,19,10,7,2,3,6,6,4,3,5,16,19,7,8,11,16,12,8,15,13,2,6,4,1,11,11,17,9,8,6,5,17,3,7,13,16,10,18,2,5,7,4,13,10,10,9,7,6,6,14,10,12,10,11,19,19,9,6,13,1…	240,275,179,167,125,138,329,310,161,144,241,227,149,146,291,300,173,202,196,186,205,206,212,226,234,218,152,143,200,174,394,362,231,248,379,353,364,291,373,373,212,211,308,356,236,296,252,236,277,207,266,241,210,229,210,197,111,127,244,229,82,80,81,71,135,109,224,275,408,384,144,127,103,111,116,108,163,160,149,169,136,128,164,173,127,111,282,261,197,178,211,179,263,262,159,146,100,112,32,39,244,2…	10,9,9,22,9,6,11,17,11,7,16,14,4,8,37,35,18,18,4,8,8,12,19,15,10,9,5,11,13,15,16,19,13,13,12,15,10,15,12,3,5,11,14,24,6,2,0,1,7,4,16,14	164,144,252,233,63,80,170,201,137,125,247,220,120,109,518,484,245,249,128,148,247,202,265,245,152,151,204,202,322,309,208,217,195,216,179,183,174,140,117,124,85,73,222,236,49,38,28,23,88,91,299,288	100	50	0.000425903	0.0252495	0.038,0.018,0.014,0.026,0.02,0.011,0.035,0.036,0.012,0.017,0.022,0.03,0.017,0.02,0.036,0.023,0.044,0.022,0.01,0.034,0.024,0.024,0.032,0.034,0.025,0.035,0.019,0.01,0.043,0.033,0.037,0.026,0.029,0.031,0.019,0.029,0.024,0.036,0.034,0.031,0.009,0.012,0.014,0.014,0.029,0.017,0.042,0.013,0.031,0.042,0.022,0.02,0.043,0.032,0.009,0.01,0.004,0.008,0.045,0.034,0.012,0.03,0.018,0.041,0.018,0.031,0.039,0.013…	0.03,0.03,0.018,0.045,0.067,0.036,0.031,0.041,0.039,0.027,0.031,0.031,0.016,0.035,0.034,0.035,0.035,0.035,0.015,0.026,0.016,0.029,0.035,0.03,0.032,0.029,0.012,0.027,0.02,0.024,0.037,0.042,0.032,0.029,0.032,0.039,0.028,0.051,0.049,0.012,0.029,0.07,0.031,0.048,0.058,0.026,0.0,0.021,0.038,0.022,0.026,0.024	-0.006
9477	ENSG00000155957	TMBIM4	chr12	-	66169289	66169353	66153339	66153448	66169854	66169969	9477	4,3,0,0,11,13,2,6,4,7,4,2,10,8,14,9,4,6,8,15,2,6,8,7,6,12,13,8,5,9,2,5,4,4,2,3,8,5,8,6,16,24,10,9,3,6,3,6,8,12,6,6,7,8,10,5,7,7,6,5,7,5,11,8,5,1,4,2,15,9,7,10,2,3,8,1,11,13,12,3,14,6,4,1,7,4,6,5,2,10,3,4,10,8,1,1,3,3,2,1,0,4,4,3,5,4,11,2,5,6,4,3,0,0,6,6,2,2,8,5,7,2,6,4,13,12,10,13,3,2,8,1,3,0,3,4,6,7,7,4,1,11,4,4,4,6,6,10,6,0,5,14,5,6,7,7,4,7,5,2,3,6,3,6,5,3,5,6,0,0,4,2,8,4,4,5,6,3,9,5,3,1,4,2,0,…	170,191,115,96,141,131,176,145,196,167,132,108,104,106,132,132,127,148,173,170,105,84,150,171,162,153,173,169,117,132,152,154,138,136,140,152,159,153,171,167,239,219,204,211,164,137,166,179,139,148,73,85,128,138,203,196,139,143,142,129,119,126,72,57,131,120,155,153,256,222,107,100,64,82,112,92,121,138,142,126,171,155,119,118,108,121,113,134,201,204,103,109,126,119,48,57,36,32,49,67,135,136,51,58,…	4,7,8,4,2,2,6,3,6,5,6,7,9,2,1,1,7,3,6,7,1,4,7,8,6,5,4,6,3,4,8,1,4,9,3,5,5,1,1,1,1,1,5,5,0,0,0,0,2,4,5,14	136,130,161,144,84,88,73,73,131,134,145,128,101,128,141,151,174,163,253,206,221,215,191,183,140,136,166,161,165,163,155,164,156,166,138,166,45,52,50,69,81,71,131,103,21,27,41,50,50,56,167,170	100	50	5.52476e-09	7.30976e-07	0.012,0.008,0.0,0.0,0.038,0.047,0.006,0.02,0.01,0.021,0.015,0.009,0.046,0.036,0.05,0.033,0.016,0.02,0.023,0.042,0.009,0.034,0.026,0.02,0.018,0.038,0.036,0.023,0.021,0.033,0.007,0.016,0.014,0.014,0.007,0.01,0.025,0.016,0.023,0.018,0.032,0.052,0.024,0.021,0.009,0.021,0.009,0.016,0.028,0.039,0.039,0.034,0.027,0.028,0.024,0.013,0.025,0.024,0.021,0.019,0.029,0.019,0.071,0.066,0.019,0.004,0.013,0.006,0…	0.014,0.026,0.024,0.014,0.012,0.011,0.039,0.02,0.022,0.018,0.02,0.027,0.043,0.008,0.004,0.003,0.02,0.009,0.012,0.017,0.002,0.009,0.018,0.021,0.021,0.018,0.012,0.018,0.009,0.012,0.025,0.003,0.013,0.026,0.011,0.015,0.053,0.01,0.01,0.007,0.006,0.007,0.019,0.024,0.0,0.0,0.0,0.0,0.02,0.034,0.015,0.04	0.006
9517	ENSG00000135655	USP15	chr12	+	62396294	62396398	62393052	62393202	62401186	62401275	9517	446,553,304,301,733,808,592,595,968,902,456,450,371,364,738,758,501,599,1243,1118,316,296,633,685,691,650,888,871,1199,1205,591,554,442,475,451,445,792,741,1226,1178,1545,1527,1349,1325,769,753,1194,1200,421,419,1180,1060,684,674,1202,1192,1062,1024,839,836,774,813,352,379,414,365,544,560,1379,1298,672,622,328,298,935,856,852,883,914,914,910,883,585,602,730,688,681,658,912,766,411,405,786,734,493…	5,2,3,6,1,1,8,9,16,21,3,5,1,1,2,0,3,6,3,6,7,10,4,3,15,9,9,7,6,9,10,10,0,1,7,8,2,1,2,1,1,2,4,4,1,2,4,3,0,2,7,5,29,13,30,25,8,8,25,17,5,4,44,40,6,3,11,5,8,6,3,3,1,5,13,16,5,4,5,2,4,3,1,2,6,13,1,2,25,29,8,9,20,16,19,10,2,3,2,2,2,3,0,0,1,1,3,2,56,43,0,2,0,1,4,2,11,8,2,1,2,1,0,1,0,0,0,0,3,1,0,0,0,0,0,0,0,0,0,1,0,0,0,1,0,0,0,1,5,0,1,1,2,1,2,1,0,0,0,1,6,3,0,0,0,0,3,0,8,2,14,11,6,4,1,0,0,1,2,1,3,2,3,1,0,…	1.19311e+164	0,0,5,6,2,4,0,0,1,3,0,1,3,5,0,3,0,0,0,0,0,0,1,1,0,1,1,1,2,3,4,1,3,3,3,2,0,0,4,6,2,2,12,8,0,0,0,0,1,4,1,0	100	50	2.86203e-09	3.93887e-07	0.978,0.993,0.981,0.962,0.997,0.998,0.974,0.971,0.968,0.956,0.987,0.978,0.995,0.995,0.995,1.0,0.988,0.98,0.995,0.989,0.958,0.937,0.988,0.991,0.958,0.973,0.98,0.984,0.99,0.985,0.967,0.965,1.0,0.996,0.97,0.965,0.995,0.997,0.997,0.998,0.999,0.997,0.994,0.994,0.997,0.995,0.993,0.995,1.0,0.991,0.988,0.991,0.922,0.963,0.952,0.96,0.985,0.985,0.944,0.961,0.987,0.99,0.8,0.826,0.972,0.984,0.961,0.982,0.989…	1.0,1.0,0.99,0.987,0.989,0.979,1.0,1.0,0.997,0.992,1.0,0.998,0.986,0.977,1.0,0.988,1.0,1.0,1.0,1.0,1.0,1.0,0.998,0.998,1.0,0.996,0.997,0.997,0.993,0.989,0.99,0.998,0.994,0.994,0.995,0.997,1.0,1.0,0.963,0.947,0.992,0.992,0.969,0.978,1.0,1.0,1.0,1.0,0.994,0.977,0.998,1.0	-0.01
9614	ENSG00000170956	CEACAM3	chr19	+	41807110	41807244	41797588	41797948	41808812	41809621	9614	28,36,26,32,79,82,35,26,77,66,50,54,57,36,26,21,8,10,37,47,26,31,26,25,97,113,52,51,26,24,42,26,47,48,55,53,36,45,30,36,23,33,46,39,59,62,21,41,44,54,18,33,46,31,39,48,17,15,18,18,17,32,7,13,68,48,45,41,139,114,80,83,29,27,20,16,18,21,20,38,28,27,83,66,37,36,31,31,57,48,43,44,39,34,66,58,29,23,21,31,19,13,74,63,126,118,43,53,99,121,30,41,25,25,57,84,27,33,62,58,31,36,97,90,68,38,118,115,58,51,30,…	24,28,24,24,77,76,15,16,70,69,28,33,13,20,26,27,4,7,48,57,12,5,15,29,22,34,27,28,9,7,20,19,28,26,34,31,21,25,10,31,18,25,34,26,49,50,22,16,27,33,10,16,23,32,18,28,17,17,6,6,25,21,7,5,62,48,26,15,79,57,48,31,16,20,22,20,17,18,12,17,25,37,35,53,54,51,29,32,55,56,39,48,28,34,36,43,43,64,33,31,15,13,55,53,56,55,23,29,77,78,20,22,56,79,28,41,17,13,35,32,31,29,46,22,43,44,97,88,48,39,48,35,52,42,27,31,…	18,14,65,59,53,49,14,18,59,68,42,27,61,39,41,42,66,67,74,63,62,53,44,35,32,35,46,53,92,84,49,37,42,30,41,44,38,33,21,15,70,67,56,54,13,19,24,23,36,44,46,37	33,28,81,59,73,77,24,14,60,25,56,49,33,21,70,70,109,75,100,96,106,100,28,27,51,58,97,106,92,84,62,60,39,30,25,29,53,48,27,19,168,188,58,52,57,65,22,37,48,49,18,39	100	50	0	0	0.368,0.391,0.351,0.4,0.339,0.35,0.538,0.448,0.355,0.324,0.472,0.45,0.687,0.474,0.333,0.28,0.5,0.417,0.278,0.292,0.52,0.756,0.464,0.301,0.688,0.624,0.491,0.477,0.591,0.632,0.512,0.406,0.456,0.48,0.447,0.461,0.462,0.474,0.6,0.367,0.39,0.398,0.404,0.429,0.376,0.383,0.323,0.562,0.449,0.45,0.474,0.508,0.5,0.326,0.52,0.462,0.333,0.306,0.6,0.6,0.254,0.432,0.333,0.565,0.354,0.333,0.464,0.577,0.468,0.5,0…	0.214,0.2,0.286,0.333,0.266,0.241,0.226,0.391,0.33,0.576,0.273,0.216,0.48,0.481,0.227,0.231,0.232,0.309,0.27,0.247,0.226,0.209,0.44,0.393,0.239,0.232,0.192,0.2,0.333,0.333,0.283,0.236,0.35,0.333,0.451,0.431,0.264,0.256,0.28,0.283,0.172,0.151,0.326,0.342,0.102,0.128,0.353,0.237,0.273,0.31,0.561,0.322	0.112
9629	ENSG00000092841	MYL6	chr12	+	56159497	56159622	56158683	56158711	56159974	56160148	9629	18,20,19,20,22,27,26,19,26,30,30,29,28,23,40,39,20,24,55,36,26,15,26,21,35,34,26,24,47,38,28,30,31,22,29,25,28,23,21,16,31,17,30,46,31,30,25,17,36,23,21,20,24,30,23,21,34,26,27,26,29,30,31,31,21,27,14,29,62,41,46,42,11,15,23,16,41,38,24,17,45,33,36,29,59,64,28,26,30,30,19,38,28,34,36,42,44,45,53,31,31,23,11,14,19,15,23,19,11,12,20,34,61,58,16,11,36,30,26,21,24,25,25,24,22,30,23,32,39,42,49,40,68,…	55,54,68,72,59,61,52,61,70,52,86,69,39,29,79,101,71,84,139,141,44,53,50,34,64,62,89,96,117,87,110,79,52,40,76,111,65,78,137,121,65,66,118,117,123,131,93,87,62,54,62,61,76,80,73,59,106,98,77,80,81,76,222,184,66,82,58,56,218,210,118,107,63,32,99,71,141,137,55,67,118,101,93,124,154,121,58,90,151,139,93,109,85,87,173,148,151,140,170,166,115,118,35,35,34,50,66,72,57,65,52,55,226,230,32,40,97,97,78,96,…	31,49,49,43,103,81,61,46,35,23,34,46,23,27,69,78,48,46,55,48,43,30,25,25,22,26,43,50,33,32,42,58,50,63,25,25,61,40,57,45,48,58,29,21,66,41,98,96,40,40,51,45	110,107,114,118,168,161,98,76,108,66,153,124,46,34,136,157,99,85,117,113,86,75,71,66,61,58,153,131,47,53,153,160,441,419,64,61,156,119,126,135,139,161,62,78,64,73,267,260,99,96,127,143	100	50	0.000176352	0.0115426	0.141,0.156,0.123,0.122,0.157,0.181,0.2,0.135,0.157,0.224,0.149,0.174,0.264,0.284,0.202,0.162,0.123,0.125,0.165,0.113,0.228,0.124,0.206,0.236,0.215,0.215,0.127,0.111,0.167,0.179,0.113,0.16,0.23,0.216,0.16,0.101,0.177,0.128,0.071,0.062,0.193,0.114,0.113,0.164,0.112,0.103,0.118,0.089,0.225,0.176,0.145,0.141,0.136,0.158,0.136,0.151,0.138,0.117,0.149,0.14,0.152,0.165,0.065,0.078,0.137,0.141,0.108,0.2…	0.124,0.186,0.177,0.154,0.235,0.201,0.237,0.232,0.139,0.148,0.1,0.156,0.2,0.284,0.202,0.199,0.195,0.213,0.19,0.175,0.2,0.167,0.15,0.159,0.153,0.183,0.123,0.16,0.26,0.232,0.121,0.153,0.054,0.07,0.163,0.17,0.164,0.144,0.184,0.143,0.147,0.153,0.19,0.119,0.34,0.219,0.155,0.156,0.168,0.172,0.167,0.136	-0.017
9726	ENSG00000197111	PCBP2	chr12	+	53464759	53464852	53462480	53462567	53465931	53465973	9726	429,429,349,326,482,431,549,528,350,343,452,434,415,395,486,452,462,485,598,580,404,329,521,470,360,361,418,363,502,475,500,437,399,428,468,426,341,314,582,541,414,406,350,282,350,352,536,496,604,570,403,434,464,463,394,377,412,400,411,456,230,221,582,569,527,491,384,395,627,583,243,225,185,174,291,296,363,342,328,334,577,533,325,310,418,392,291,283,411,394,424,374,398,414,419,383,360,360,90,109,…	120,120,99,109,84,111,161,193,126,121,141,150,126,113,204,186,166,145,154,156,133,115,157,175,137,126,134,113,145,160,205,189,124,124,151,144,129,128,125,135,147,150,112,126,135,115,168,124,205,172,147,129,160,193,131,112,134,121,167,170,75,80,166,173,104,97,116,124,223,198,72,61,79,74,81,61,116,102,121,93,158,169,122,132,142,120,120,130,161,138,141,126,169,171,128,122,146,121,37,40,200,160,62,60…	6.02636e+155	151,171,240,189,92,86,173,187,147,150,189,168,167,155,129,128,175,190,129,128,205,198,185,167,168,168,200,187,136,138,236,182,161,139,194,199,100,83,95,113,99,115,215,189,42,36,60,50,106,130,227,222	100	50	5.21357e-09	6.95178e-07	0.641,0.641,0.638,0.599,0.742,0.66,0.63,0.578,0.581,0.586,0.616,0.591,0.622,0.636,0.544,0.549,0.582,0.626,0.66,0.65,0.603,0.589,0.624,0.573,0.568,0.589,0.609,0.616,0.634,0.597,0.549,0.536,0.617,0.633,0.608,0.597,0.569,0.551,0.7,0.667,0.585,0.575,0.61,0.528,0.565,0.605,0.615,0.667,0.596,0.624,0.578,0.627,0.592,0.545,0.601,0.627,0.606,0.623,0.552,0.573,0.605,0.58,0.637,0.622,0.717,0.717,0.623,0.614…	0.666,0.65,0.574,0.649,0.599,0.591,0.675,0.64,0.671,0.661,0.643,0.661,0.652,0.657,0.671,0.654,0.671,0.64,0.633,0.634,0.661,0.64,0.646,0.656,0.679,0.66,0.604,0.633,0.673,0.661,0.58,0.634,0.61,0.631,0.679,0.64,0.648,0.688,0.707,0.645,0.717,0.678,0.627,0.678,0.58,0.613,0.705,0.717,0.615,0.553,0.618,0.626	-0.032
9738	ENSG00000123349	PFDN5	chr12	+	53295838	53295941	53295290	53295639	53296429	53296467	9738	472,571,420,406,378,372,786,839,383,396,614,618,589,611,424,450,259,289,516,516,693,643,386,408,904,992,286,306,278,271,967,899,434,450,621,638,719,705,315,301,313,323,390,378,355,400,307,278,641,610,342,377,349,302,304,326,517,533,718,659,312,287,459,444,606,567,499,480,613,551,526,512,261,239,365,338,655,599,344,342,316,301,430,476,276,335,490,443,402,316,920,952,393,337,498,551,1010,949,816,83…	1,4,2,3,5,13,3,4,6,2,5,5,8,3,2,2,2,1,4,2,3,3,1,5,5,6,4,3,2,5,1,10,5,0,5,4,8,7,2,4,4,1,4,4,2,1,5,3,1,4,10,3,2,4,3,3,6,12,9,10,3,1,6,6,9,4,3,6,1,4,7,0,2,2,3,2,13,12,5,2,4,0,5,3,3,1,1,4,3,7,13,7,8,4,10,10,11,9,6,5,3,5,2,2,5,1,5,7,4,5,5,12,17,15,8,6,10,23,7,4,9,4,4,7,3,2,5,3,9,7,3,5,4,4,3,4,3,6,2,3,13,12,4,4,1,2,2,1,2,1,8,7,3,6,4,9,3,4,2,4,4,9,3,6,4,4,4,3,7,7,5,2,3,6,9,4,5,2,9,5,3,7,2,3,10,11,4,9,5,1…	9.46101e+185	8,7,4,3,6,10,10,15,8,11,3,12,7,17,2,0,9,8,3,3,5,5,2,0,7,7,6,7,3,1,7,4,10,14,1,2,15,6,6,10,10,8,5,6,9,8,2,2,12,14,8,7	100	50	0.000187041	0.0121392	0.996,0.986,0.991,0.985,0.974,0.935,0.992,0.991,0.97,0.99,0.984,0.984,0.974,0.99,0.991,0.991,0.985,0.993,0.985,0.992,0.991,0.991,0.995,0.976,0.989,0.988,0.973,0.981,0.986,0.964,0.998,0.978,0.977,1.0,0.984,0.988,0.978,0.981,0.987,0.974,0.975,0.994,0.98,0.979,0.989,0.995,0.968,0.979,0.997,0.987,0.945,0.984,0.989,0.974,0.981,0.982,0.977,0.957,0.976,0.971,0.981,0.993,0.975,0.974,0.971,0.986,0.988,0.9…	0.983,0.986,0.987,0.991,0.989,0.982,0.991,0.986,0.985,0.978,0.993,0.974,0.987,0.966,0.996,1.0,0.983,0.985,0.99,0.989,0.988,0.987,0.99,1.0,0.987,0.986,0.99,0.987,0.992,0.997,0.987,0.993,0.98,0.972,0.996,0.993,0.982,0.992,0.994,0.989,0.984,0.987,0.992,0.99,0.991,0.992,0.996,0.995,0.984,0.981,0.987,0.989	-0.005
9836	ENSG00000139624	CERS5	chr12	-	50132961	50134068	50129797	50130694	50134545	50134702	9836	1,5,0,2,1,2,3,4,2,2,5,0,4,11,1,0,3,1,5,1,2,6,4,8,4,4,7,7,1,3,5,1,4,4,5,4,6,4,1,6,3,4,1,2,0,7,9,2,3,5,4,3,2,4,6,1,3,3,4,7,1,1,2,1,2,6,2,3,3,3,5,3,2,1,2,2,0,0,6,5,2,5,0,1,0,0,3,5,2,2,1,1,9,5,3,2,12,14,0,3,4,4,1,0,4,6,4,0,1,3,0,0,5,2,1,3,2,5,2,1,1,3,11,5,5,5,3,4,2,4,1,0,0,6,3,6,5,0,0,3,2,2,7,4,7,2,9,4,4,2,3,10,4,9,9,3,4,1,1,3,0,3,1,2,3,4,2,5,3,3,5,3,4,1,2,4,1,3,6,3,2,5,4,2,1,3,1,5,0,5,8,6,8,5,2,1,5,…	16,26,28,30,36,32,37,34,33,21,37,48,26,20,36,37,18,14,40,40,44,38,20,33,43,44,38,28,34,26,42,54,24,25,40,28,27,36,52,48,41,26,41,25,32,30,32,27,36,48,32,19,35,38,30,25,34,29,30,36,26,23,34,34,37,33,27,26,59,48,15,22,22,28,17,24,48,39,25,21,39,38,37,47,22,29,41,23,30,35,21,40,28,18,44,33,33,18,17,13,50,73,17,26,35,29,48,42,24,17,39,49,31,16,27,46,53,57,33,44,35,25,32,39,32,24,39,62,31,30,29,32,30,…	2,3,0,0,0,1,4,4,2,1,1,0,5,6,6,4,2,4,3,3,5,3,3,6,6,1,2,1,8,3,3,1,2,3,0,7,2,3,8,4,5,1,1,1,0,1,2,1,5,6,5,4	69,52,49,55,52,71,60,46,49,45,56,43,45,65,58,40,55,83,69,84,52,65,45,47,74,55,73,67,32,40,78,52,53,62,52,47,40,47,28,23,55,59,53,48,34,29,41,30,58,55,60,85	100	50	3.2452e-08	3.81843e-06	0.03,0.088,0.0,0.032,0.014,0.03,0.039,0.056,0.029,0.045,0.063,0.0,0.071,0.216,0.014,0.0,0.077,0.034,0.059,0.012,0.022,0.073,0.091,0.108,0.044,0.043,0.084,0.111,0.014,0.055,0.056,0.009,0.077,0.074,0.059,0.067,0.1,0.053,0.01,0.059,0.035,0.071,0.012,0.038,0.0,0.104,0.123,0.036,0.04,0.05,0.059,0.073,0.028,0.05,0.091,0.02,0.042,0.049,0.062,0.089,0.019,0.021,0.029,0.014,0.026,0.083,0.036,0.055,0.025,0.…	0.014,0.028,0.0,0.0,0.0,0.007,0.032,0.042,0.02,0.011,0.009,0.0,0.053,0.044,0.049,0.048,0.018,0.024,0.021,0.018,0.046,0.023,0.032,0.06,0.039,0.009,0.014,0.007,0.111,0.036,0.019,0.01,0.019,0.024,0.0,0.069,0.024,0.031,0.125,0.08,0.043,0.008,0.009,0.01,0.0,0.017,0.024,0.016,0.041,0.052,0.04,0.023	0.02
9851	ENSG00000178449	COX14	chr12	+	50118492	50118552	50112203	50112301	50120035	50120457	9851	4,12,10,6,3,11,0,0,7,5,0,0,12,13,4,6,7,6,7,5,5,9,0,0,13,8,4,14,5,1,0,0,6,5,0,0,8,5,2,6,1,6,1,4,2,7,3,1,9,13,1,8,12,6,1,1,5,4,3,2,3,5,0,0,1,0,0,0,7,13,2,2,0,0,9,4,26,21,3,2,0,0,5,4,1,2,0,0,0,2,8,7,5,3,11,2,23,12,7,6,14,17,0,0,0,1,27,15,2,4,13,11,22,12,6,6,16,18,10,8,11,25,6,8,0,0,13,9,7,6,20,17,0,0,8,12,6,7,16,7,18,17,7,11,5,5,0,0,0,0,0,0,1,6,3,2,6,8,13,11,6,6,3,1,5,6,17,13,8,4,4,3,11,9,4,3,5,4,0,…	62,88,40,37,66,56,76,57,35,35,81,53,91,64,30,38,55,53,52,63,83,87,38,26,81,91,45,45,15,20,81,77,44,61,67,67,45,52,29,28,33,48,35,26,35,29,23,33,76,70,35,39,33,46,18,30,57,44,60,49,33,34,93,113,93,86,43,42,78,97,28,47,23,35,36,36,51,38,43,43,39,42,42,35,38,24,45,49,31,32,57,63,41,25,57,64,69,88,57,42,95,86,43,40,38,40,48,41,54,62,106,125,129,119,53,50,103,119,85,75,76,68,63,53,22,35,66,57,92,93,72…	20,17,6,5,5,13,12,13,17,6,14,17,17,10,4,4,22,22,12,9,11,10,4,6,25,25,20,7,6,3,1,5,11,12,8,7,22,21,15,23,23,22,11,16,0,0,2,2,11,4,5,1	69,62,55,52,97,89,175,182,74,74,65,63,78,63,66,72,107,84,48,59,78,63,46,32,94,92,51,61,61,46,85,88,63,67,49,43,71,82,112,110,108,88,73,95,137,130,49,54,91,85,66,82	100	50	1.34538e-10	2.1379e-08	0.031,0.064,0.111,0.075,0.022,0.089,0.0,0.0,0.091,0.067,0.0,0.0,0.062,0.092,0.062,0.073,0.06,0.054,0.063,0.038,0.029,0.049,0.0,0.0,0.074,0.042,0.043,0.135,0.143,0.024,0.0,0.0,0.064,0.039,0.0,0.0,0.082,0.046,0.033,0.097,0.015,0.059,0.014,0.071,0.028,0.108,0.061,0.015,0.056,0.085,0.014,0.093,0.154,0.061,0.027,0.016,0.042,0.043,0.024,0.02,0.043,0.068,0.0,0.0,0.005,0.0,0.0,0.0,0.043,0.063,0.034,0.021…	0.127,0.121,0.052,0.046,0.025,0.068,0.033,0.034,0.103,0.039,0.097,0.119,0.098,0.074,0.029,0.027,0.093,0.116,0.111,0.071,0.066,0.074,0.042,0.086,0.117,0.12,0.164,0.054,0.047,0.032,0.006,0.028,0.08,0.082,0.075,0.075,0.134,0.114,0.063,0.095,0.096,0.111,0.07,0.078,0.0,0.0,0.02,0.018,0.057,0.023,0.036,0.006	-0.018
9983	ENSG00000134283	PPHLN1	chr12	+	42351884	42352049	42335882	42335974	42355160	42355222	9983	27,32,17,24,12,13,36,30,22,18,33,25,36,38,24,14,44,35,23,31,50,56,28,28,46,43,31,24,15,10,31,48,24,22,27,30,43,48,27,16,21,22,22,15,3,13,16,15,26,37,24,21,27,29,21,25,10,12,44,27,21,18,33,26,16,23,30,13,57,48,19,12,11,11,8,7,9,13,25,17,24,10,16,17,15,6,27,26,17,12,12,29,19,27,9,8,2,11,5,7,27,20,8,6,29,21,9,14,24,14,53,45,5,1,34,36,35,33,32,28,24,22,23,28,8,12,21,18,11,9,25,26,8,8,33,29,22,44,21,3…	9,16,5,12,8,5,24,15,8,4,17,14,31,26,3,6,11,11,9,8,40,22,20,8,23,22,9,2,3,2,24,24,17,16,15,9,17,16,15,13,14,8,4,8,7,3,7,8,12,14,12,4,13,8,0,0,7,0,14,14,10,10,3,4,14,7,15,18,21,20,8,5,3,2,2,3,11,2,12,8,3,8,10,13,3,9,5,9,5,5,6,11,5,2,8,13,1,3,0,5,10,24,2,4,23,10,9,5,3,5,12,23,2,4,27,25,20,24,11,17,16,7,14,9,4,6,10,17,15,9,8,7,1,3,20,13,10,7,9,8,9,11,11,15,4,7,12,11,22,20,5,5,5,6,17,15,2,2,13,10,12,9…	5,8,27,21,4,9,22,15,26,14,16,18,36,29,17,25,27,22,21,18,12,14,18,18,15,13,13,14,30,25,14,25,18,21,15,16,3,10,6,9,10,13,33,23,2,1,3,3,7,3,20,18	7,5,15,12,5,3,16,19,17,14,5,4,37,27,18,22,15,11,16,6,5,8,10,9,23,17,10,11,14,16,7,8,7,7,9,7,5,0,7,7,8,4,25,24,4,4,5,4,5,10,17,13	100	50	2.21909e-05	0.00169332	0.6,0.5,0.63,0.5,0.429,0.565,0.429,0.5,0.579,0.692,0.493,0.472,0.367,0.422,0.8,0.538,0.667,0.614,0.561,0.66,0.385,0.56,0.412,0.636,0.5,0.494,0.633,0.857,0.714,0.714,0.392,0.5,0.414,0.407,0.474,0.625,0.558,0.6,0.474,0.381,0.429,0.579,0.733,0.484,0.176,0.684,0.533,0.484,0.52,0.569,0.5,0.724,0.509,0.644,1.0,1.0,0.417,1.0,0.611,0.491,0.512,0.474,0.846,0.765,0.364,0.622,0.5,0.265,0.576,0.545,0.543,0.5…	0.263,0.444,0.474,0.467,0.286,0.6,0.407,0.283,0.433,0.333,0.615,0.692,0.327,0.349,0.321,0.362,0.474,0.5,0.396,0.6,0.545,0.467,0.474,0.5,0.246,0.277,0.394,0.389,0.517,0.439,0.5,0.61,0.562,0.6,0.455,0.533,0.231,1.0,0.3,0.391,0.385,0.619,0.398,0.324,0.2,0.111,0.231,0.273,0.412,0.13,0.37,0.409	0.111
10032	ENSG00000103363	ELOB	chr16	-	2775450	2775556	2771413	2772102	2776992	2777127	10032	361,363,199,228,260,249,221,250,89,98,272,273,249,260,153,132,263,294,471,486,178,134,142,146,116,120,141,140,128,105,197,180,306,319,348,322,88,100,199,176,113,115,66,66,90,116,186,176,354,340,86,83,150,146,111,106,362,272,102,113,147,111,202,221,432,424,176,177,406,376,134,139,82,86,165,168,369,347,126,111,464,410,97,99,284,238,66,64,72,62,267,261,55,54,454,391,990,922,330,306,357,345,59,54,32,…	7,9,3,1,4,7,7,7,1,6,2,1,4,4,2,1,3,4,9,4,4,2,6,6,3,6,2,2,5,2,4,0,3,3,6,4,3,1,3,3,5,5,2,2,3,3,1,1,5,5,0,2,5,3,3,3,6,1,5,2,1,2,6,16,5,9,4,4,6,10,2,3,0,1,6,4,4,6,4,5,7,9,4,1,6,3,2,2,3,1,5,3,2,2,7,8,8,7,3,4,7,7,1,1,0,0,1,3,1,1,8,7,35,33,0,3,10,4,6,2,3,2,1,2,10,8,4,1,11,15,12,10,27,26,3,3,0,3,3,1,12,8,0,3,7,6,2,1,7,3,1,4,3,1,2,5,8,7,6,2,12,12,10,10,9,9,6,5,4,7,2,4,4,16,4,10,5,11,14,12,20,17,10,12,24,20…	8.10805e+163	8,14,8,10,10,11,19,14,13,15,14,25,4,3,6,5,6,9,7,2,6,8,4,5,9,11,24,26,9,7,18,26,21,16,5,3,1,10,38,42,29,20,10,7,40,45,21,19,19,15,5,6	100	50	0.000263073	0.0164503	0.963,0.953,0.971,0.991,0.97,0.947,0.94,0.947,0.978,0.891,0.986,0.993,0.969,0.97,0.975,0.985,0.978,0.974,0.963,0.984,0.957,0.971,0.922,0.924,0.951,0.909,0.972,0.972,0.928,0.963,0.961,1.0,0.981,0.982,0.967,0.976,0.936,0.98,0.971,0.967,0.919,0.92,0.943,0.943,0.938,0.951,0.989,0.989,0.973,0.971,1.0,0.954,0.938,0.961,0.949,0.946,0.968,0.993,0.911,0.966,0.987,0.965,0.944,0.874,0.977,0.959,0.957,0.957,…	0.981,0.966,0.952,0.94,0.977,0.976,0.969,0.974,0.95,0.936,0.966,0.943,0.974,0.98,0.979,0.982,0.981,0.972,0.952,0.986,0.977,0.97,0.973,0.963,0.973,0.966,0.946,0.941,0.949,0.964,0.954,0.94,0.959,0.967,0.97,0.981,0.995,0.959,0.948,0.939,0.952,0.966,0.96,0.971,0.963,0.96,0.957,0.959,0.958,0.967,0.979,0.975	-0.002
10575	ENSG00000151651	ADAM8	chr10	-	133263687	133263765	133262419	133263233	133267351	133267417	10575	214,233,109,144,264,278,110,84,111,103,158,160,122,115,122,111,118,104,257,268,50,53,122,137,52,56,109,139,88,80,93,103,150,183,141,165,63,77,163,167,131,116,35,28,87,89,171,173,161,148,93,98,188,178,162,160,233,226,86,95,120,98,107,137,244,241,92,91,287,246,132,133,58,71,87,94,124,128,108,96,314,294,117,125,205,215,44,52,73,73,119,122,53,66,175,151,339,285,85,77,114,132,60,49,43,30,111,99,163,13…	17,14,11,17,34,32,5,9,5,3,9,8,8,12,4,5,11,12,21,15,27,13,10,4,16,17,6,2,12,14,11,5,13,18,23,15,3,1,12,11,11,8,0,2,12,12,16,13,51,56,10,5,11,16,18,21,11,8,3,0,6,4,12,16,30,35,10,4,52,51,3,7,0,6,44,54,21,21,6,9,13,15,16,20,8,8,5,7,10,8,20,16,14,11,26,23,57,53,0,1,42,56,5,9,7,6,16,17,19,20,6,7,46,33,13,17,31,30,16,25,9,6,12,4,33,19,26,27,73,73,8,20,25,29,8,13,5,8,7,6,2,3,7,8,22,17,6,10,2,3,12,20,5,1…	6.58617e+155	23,23,14,27,13,9,11,5,16,23,27,30,19,15,6,6,19,10,20,12,12,11,21,25,17,14,42,34,12,13,20,26,22,19,6,12,10,7,44,51,43,43,17,12,5,3,21,14,22,20,7,8	100	50	0	0	0.863,0.893,0.832,0.809,0.795,0.813,0.917,0.824,0.917,0.945,0.898,0.909,0.884,0.827,0.938,0.917,0.843,0.812,0.86,0.899,0.481,0.671,0.859,0.945,0.619,0.622,0.901,0.972,0.786,0.741,0.809,0.912,0.852,0.836,0.754,0.846,0.913,0.975,0.872,0.884,0.856,0.879,1.0,0.875,0.784,0.788,0.842,0.869,0.612,0.569,0.823,0.907,0.895,0.848,0.818,0.792,0.914,0.934,0.935,1.0,0.909,0.925,0.817,0.811,0.803,0.775,0.821,0.…	0.935,0.931,0.918,0.864,0.917,0.932,0.919,0.961,0.94,0.916,0.91,0.909,0.872,0.884,0.957,0.956,0.928,0.96,0.863,0.899,0.956,0.958,0.908,0.894,0.929,0.941,0.893,0.912,0.945,0.944,0.912,0.891,0.938,0.942,0.97,0.938,0.925,0.944,0.771,0.758,0.905,0.904,0.897,0.921,0.972,0.983,0.881,0.921,0.899,0.905,0.97,0.959	-0.086
10795	ENSG00000214413	BBIP1	chr10	-	110907679	110907836	110901537	110901612	110919120	110919176	10795	3,3,9,4,6,7,9,11,8,13,3,2,2,7,9,15,2,2,8,8,6,11,8,13,10,7,5,9,7,4,2,4,2,5,8,11,6,5,10,5,5,6,15,13,9,7,10,10,8,6,8,10,10,19,10,7,1,2,12,5,3,6,8,11,4,9,5,8,9,8,3,7,5,2,3,1,7,4,4,2,5,5,12,9,11,8,7,5,16,5,2,7,11,12,9,7,2,1,6,2,8,2,7,5,6,9,9,5,17,8,11,8,6,4,9,7,3,2,6,7,5,7,7,6,5,5,3,11,12,7,3,5,4,3,5,4,7,8,4,7,6,3,4,6,3,3,9,9,8,12,5,5,5,3,9,3,4,5,4,4,4,5,7,9,6,2,4,1,8,3,9,8,4,6,6,2,3,5,16,12,5,6,8,7,8…	10,11,9,6,9,11,20,21,34,32,14,19,6,9,37,29,12,17,17,18,13,8,38,24,24,14,33,24,20,22,22,16,25,14,16,23,13,14,27,10,18,19,31,30,33,35,22,30,19,17,29,17,30,36,19,19,16,11,14,24,13,7,4,4,18,20,14,18,30,47,14,15,11,8,16,13,17,17,17,16,14,13,34,40,54,29,20,25,64,42,16,19,36,30,40,14,9,9,29,15,7,15,11,9,7,23,16,10,6,16,13,14,10,12,17,17,8,12,21,13,4,11,22,21,32,19,15,16,12,19,18,14,6,5,10,10,20,19,22,22…	8,7,12,18,2,4,5,5,1,6,3,5,2,3,5,8,11,13,9,3,3,8,13,14,5,9,3,4,9,9,10,12,5,11,13,13,1,3,11,8,2,2,5,4,6,2,5,4,0,7,9,9	40,54,47,32,23,19,12,13,17,24,36,40,10,17,44,47,48,43,54,41,37,34,45,40,22,23,33,31,14,16,58,38,32,49,29,32,14,12,27,20,16,18,30,26,7,10,24,18,6,7,46,44	100	50	2.49748e-06	0.000224468	0.13,0.12,0.333,0.25,0.25,0.241,0.184,0.208,0.105,0.169,0.097,0.05,0.143,0.28,0.108,0.205,0.077,0.056,0.19,0.182,0.188,0.407,0.095,0.213,0.172,0.2,0.07,0.158,0.149,0.083,0.043,0.111,0.038,0.152,0.2,0.193,0.188,0.152,0.156,0.2,0.122,0.136,0.195,0.178,0.12,0.091,0.185,0.143,0.174,0.15,0.121,0.227,0.143,0.209,0.208,0.156,0.03,0.083,0.3,0.094,0.103,0.3,0.5,0.579,0.1,0.184,0.152,0.182,0.13,0.078,0.097…	0.091,0.061,0.113,0.22,0.042,0.095,0.172,0.161,0.029,0.111,0.04,0.059,0.091,0.081,0.054,0.078,0.103,0.131,0.077,0.035,0.039,0.105,0.126,0.149,0.102,0.164,0.043,0.061,0.243,0.22,0.079,0.136,0.072,0.101,0.183,0.169,0.034,0.111,0.169,0.167,0.059,0.053,0.077,0.071,0.3,0.091,0.094,0.1,0.0,0.333,0.089,0.093	0.048
10841	ENSG00000173915	ATP5MD	chr10	-	103394198	103394394	103392370	103392466	103396408	103396466	10841	10,14,3,1,14,18,1,6,11,14,10,18,23,13,9,20,15,22,36,41,2,9,12,14,6,1,12,7,5,4,12,16,13,13,4,2,19,15,5,5,7,5,2,1,16,21,14,21,3,3,10,6,19,22,4,4,2,3,3,2,1,0,19,14,9,6,11,6,21,21,4,2,9,3,5,6,1,1,9,7,14,8,4,2,11,8,8,16,4,4,2,3,5,4,5,1,4,9,13,14,5,3,11,5,1,0,1,0,1,4,21,28,22,7,11,11,14,21,3,4,28,25,2,2,0,4,16,17,21,23,20,15,4,4,8,10,26,11,23,11,12,15,16,9,0,5,31,22,8,15,14,9,11,8,8,13,3,1,9,9,1,8,25,2…	189,241,159,158,204,207,259,213,142,184,234,190,248,248,188,174,159,198,195,183,262,237,174,178,370,370,175,169,105,91,275,240,155,154,228,197,210,227,186,184,206,200,299,294,141,131,134,155,239,233,103,125,218,135,207,199,170,206,220,232,191,185,168,156,253,275,148,125,394,381,238,228,93,86,176,167,252,244,190,163,143,150,264,206,174,167,197,194,159,168,250,257,206,200,179,243,254,235,240,266,33…	17,29,3,7,10,4,5,2,20,23,12,7,33,33,2,8,3,3,6,5,18,16,4,16,5,2,40,57,8,15,2,10,4,7,4,4,13,6,22,18,6,0,0,3,21,20,3,4,2,5,31,35	172,209,144,129,231,196,341,333,156,139,154,137,150,138,211,241,225,231,175,176,204,191,90,101,210,189,225,214,183,190,219,265,224,174,144,160,194,214,206,241,222,242,206,200,262,242,227,231,222,215,187,163	100	50	4.72684e-06	0.000411636	0.026,0.028,0.009,0.003,0.033,0.042,0.002,0.014,0.037,0.037,0.021,0.045,0.044,0.026,0.023,0.054,0.045,0.053,0.085,0.101,0.004,0.019,0.033,0.038,0.008,0.001,0.033,0.02,0.023,0.022,0.021,0.032,0.04,0.04,0.009,0.005,0.043,0.032,0.013,0.013,0.017,0.012,0.003,0.002,0.054,0.074,0.05,0.063,0.006,0.006,0.046,0.023,0.042,0.075,0.01,0.01,0.006,0.007,0.007,0.004,0.003,0.0,0.054,0.043,0.017,0.011,0.036,0.023…	0.047,0.065,0.01,0.026,0.021,0.01,0.007,0.003,0.06,0.076,0.037,0.025,0.099,0.107,0.005,0.016,0.007,0.006,0.017,0.014,0.042,0.04,0.022,0.073,0.012,0.005,0.082,0.118,0.021,0.038,0.005,0.019,0.009,0.02,0.014,0.012,0.032,0.014,0.051,0.036,0.013,0.0,0.0,0.007,0.039,0.04,0.007,0.009,0.004,0.011,0.077,0.097	-0.006
10846	ENSG00000174718	RESF1	chr12	+	31980877	31985957	31970188	31970356	31987238	31987322	10846	209,212,213,200,356,335,263,256,389,353,248,247,206,218,412,389,327,378,248,314,214,246,652,686,420,409,642,671,560,549,267,243,295,291,300,312,479,513,662,640,756,725,475,447,528,524,591,562,334,299,575,657,580,484,605,612,227,211,374,375,158,140,129,137,320,281,328,346,731,760,275,262,125,145,335,271,155,179,553,489,260,285,371,332,306,304,436,458,622,566,106,128,567,541,132,145,104,77,13,13,33…	7,8,12,11,7,12,14,33,21,25,6,10,14,8,17,16,17,8,10,15,4,4,50,44,26,19,41,49,20,28,2,7,20,12,13,19,21,26,40,44,52,45,23,14,11,12,32,24,13,4,11,24,28,30,17,27,16,13,22,17,8,9,6,8,3,3,17,20,36,24,13,14,2,3,19,21,9,8,41,41,12,9,10,17,15,20,13,6,25,28,13,17,30,29,6,3,6,11,0,0,9,8,8,3,7,5,27,35,12,7,4,7,3,1,14,10,4,7,6,7,8,2,15,18,13,10,17,20,5,11,10,16,3,3,4,12,8,14,23,15,3,6,4,7,3,7,7,8,11,12,33,22,1…	346,307,509,509,98,89,78,72,258,248,301,300,242,240,255,293,272,245,155,144,312,280,581,549,203,192,158,192,407,445,247,285,237,238,445,384,114,131,54,43,109,71,261,270,32,18,23,20,81,61,405,425	19,19,30,31,6,7,1,2,18,8,36,15,16,8,4,4,22,11,12,3,5,10,17,22,19,27,7,11,33,28,24,25,15,6,31,28,12,8,1,3,16,13,11,8,4,4,5,8,10,7,48,37	100	50	5.98691e-06	0.000511258	0.937,0.93,0.899,0.901,0.962,0.933,0.904,0.795,0.903,0.876,0.954,0.925,0.88,0.932,0.924,0.924,0.906,0.959,0.925,0.913,0.964,0.969,0.867,0.886,0.89,0.915,0.887,0.873,0.933,0.907,0.985,0.946,0.881,0.924,0.92,0.891,0.919,0.908,0.892,0.879,0.879,0.89,0.912,0.941,0.96,0.956,0.902,0.921,0.928,0.974,0.963,0.932,0.912,0.89,0.947,0.919,0.876,0.89,0.895,0.917,0.908,0.886,0.915,0.895,0.982,0.979,0.906,0.896…	0.901,0.89,0.895,0.891,0.891,0.864,0.975,0.947,0.878,0.939,0.807,0.909,0.883,0.938,0.97,0.973,0.861,0.918,0.866,0.96,0.969,0.933,0.945,0.926,0.842,0.78,0.919,0.897,0.86,0.888,0.837,0.851,0.888,0.952,0.878,0.873,0.826,0.891,0.964,0.878,0.773,0.732,0.922,0.944,0.8,0.692,0.697,0.556,0.802,0.813,0.808,0.852	0.041
10909	ENSG00000119929	CUTC	chr10	+	99750368	99750396	99747256	99747390	99754528	99754550	10909	41,41,27,34,51,40,45,48,44,55,44,32,63,53,39,45,63,55,62,38,48,56,44,32,62,67,95,97,45,32,68,61,30,32,35,39,49,47,52,44,96,100,80,90,30,43,42,45,60,55,42,32,56,55,75,59,91,96,60,76,62,72,37,47,51,46,42,39,59,78,38,37,40,34,28,41,107,113,105,84,124,110,54,38,78,73,51,45,49,33,62,63,72,71,62,63,27,29,40,32,38,53,33,42,42,37,83,92,39,23,62,60,32,29,55,50,48,69,86,59,61,61,83,76,41,39,65,70,43,31,52,…	3,7,2,1,6,12,5,9,5,3,1,2,7,8,4,5,9,6,2,8,3,10,7,6,4,7,7,7,3,7,9,2,4,1,2,1,8,5,6,4,15,9,9,11,3,10,5,4,2,6,9,3,3,9,22,14,7,3,2,2,8,9,1,0,10,7,3,1,10,11,10,5,4,2,6,6,8,8,11,24,12,5,12,2,2,8,6,7,3,14,3,5,5,3,3,3,1,0,1,1,11,11,3,9,7,9,10,13,1,3,5,5,4,7,9,4,3,0,5,3,6,5,13,18,5,7,12,9,2,4,13,6,9,3,3,6,5,5,10,7,2,8,2,3,5,8,5,6,6,13,15,13,3,6,6,5,7,14,5,6,2,4,6,5,6,10,8,7,8,5,2,2,6,4,6,6,12,7,14,6,4,10,8,…	73,85,56,61,74,68,79,80,57,73,66,55,60,51,72,64,74,63,136,151,73,61,88,95,49,67,52,41,56,45,68,59,74,60,71,85,46,45,52,43,86,54,58,70,25,28,80,53,50,32,75,67	11,5,2,3,1,1,11,9,5,4,4,5,5,5,8,6,3,2,8,2,7,7,6,6,7,9,7,9,4,7,5,11,13,7,10,6,7,9,5,2,0,1,2,4,7,7,9,7,2,11,5,2	78	50	6.4609e-05	0.00462127	0.898,0.79,0.896,0.956,0.845,0.681,0.852,0.774,0.849,0.922,0.966,0.911,0.852,0.809,0.862,0.852,0.818,0.855,0.952,0.753,0.911,0.782,0.801,0.774,0.909,0.86,0.897,0.899,0.906,0.746,0.829,0.951,0.828,0.954,0.918,0.962,0.797,0.858,0.847,0.876,0.804,0.877,0.851,0.84,0.865,0.734,0.843,0.878,0.951,0.855,0.749,0.872,0.923,0.797,0.686,0.73,0.893,0.954,0.951,0.961,0.832,0.837,0.96,1.0,0.766,0.808,0.9,0.962,…	0.81,0.916,0.947,0.929,0.979,0.978,0.822,0.851,0.88,0.921,0.914,0.876,0.885,0.867,0.852,0.872,0.941,0.953,0.916,0.98,0.87,0.848,0.904,0.91,0.818,0.827,0.826,0.745,0.9,0.805,0.897,0.775,0.785,0.846,0.82,0.901,0.808,0.762,0.87,0.932,1.0,0.972,0.949,0.918,0.696,0.719,0.851,0.829,0.941,0.651,0.906,0.956	-0.028
11031	ENSG00000026103	FAS	chr10	+	89010752	89010815	89010538	89010600	89011998	89012081	11031	111,130,69,73,187,180,114,87,523,514,70,85,104,98,147,143,72,60,108,116,97,119,120,118,173,160,217,188,71,58,86,80,56,70,143,108,159,143,203,182,178,180,142,144,95,96,163,149,125,110,123,157,166,163,180,152,69,58,66,79,220,230,13,10,80,96,140,111,252,259,99,77,55,76,107,81,68,60,167,153,93,107,165,119,81,58,130,118,171,171,47,82,121,131,24,23,6,12,13,11,92,87,69,70,134,111,142,150,93,86,64,76,6,6…	8,12,4,10,10,24,5,7,54,43,8,4,12,11,9,14,9,11,21,13,15,18,4,6,18,14,30,33,5,8,17,12,7,6,13,16,8,11,15,14,30,19,5,7,8,12,13,15,11,9,24,32,22,32,42,51,8,6,11,10,22,23,23,16,9,5,13,15,47,51,8,6,14,10,15,8,7,8,16,32,13,1,26,18,13,9,12,15,22,25,14,15,20,17,6,4,0,4,2,0,7,8,4,1,13,14,21,16,37,32,16,12,0,0,19,17,10,8,21,16,11,4,7,14,23,25,16,13,3,5,1,1,2,2,4,7,12,6,1,6,4,4,5,4,9,4,3,4,8,4,11,13,6,6,16,13…	150,154,162,175,37,28,14,23,101,105,84,91,140,135,144,163,179,190,206,182,134,150,159,180,73,71,111,131,155,118,82,90,95,82,69,64,9,10,10,12,51,60,73,76,1,1,16,6,13,12,91,108	11,13,8,10,3,3,0,1,16,10,4,11,13,12,7,7,18,10,12,7,6,6,14,16,7,3,3,2,11,6,8,13,17,16,3,5,0,1,7,2,5,3,5,4,0,0,0,0,0,1,9,7	100	50	8.40775e-08	9.5292e-06	0.874,0.844,0.896,0.785,0.903,0.789,0.919,0.861,0.829,0.857,0.814,0.914,0.812,0.817,0.891,0.836,0.8,0.732,0.72,0.817,0.764,0.768,0.938,0.908,0.828,0.851,0.783,0.74,0.877,0.784,0.717,0.769,0.8,0.854,0.846,0.771,0.909,0.867,0.871,0.867,0.748,0.826,0.934,0.911,0.856,0.8,0.862,0.832,0.85,0.859,0.719,0.71,0.79,0.718,0.682,0.598,0.812,0.829,0.75,0.798,0.833,0.833,0.22,0.238,0.816,0.906,0.843,0.787,0.72…	0.872,0.856,0.91,0.897,0.86,0.824,1.0,0.92,0.759,0.84,0.913,0.805,0.843,0.849,0.911,0.921,0.833,0.905,0.896,0.929,0.918,0.926,0.85,0.849,0.839,0.922,0.949,0.97,0.876,0.908,0.837,0.776,0.736,0.719,0.92,0.865,1.0,0.833,0.417,0.75,0.836,0.909,0.88,0.905,1.0,1.0,1.0,1.0,1.0,0.857,0.835,0.885	-0.055
11103	ENSG00000122359	ANXA11	chr10	-	80176106	80176155	80172806	80172869	80205342	80205537	11103	100,105,48,64,81,66,60,49,52,55,55,58,51,58,96,76,68,87,184,175,37,39,62,78,24,40,79,77,117,75,56,49,64,62,90,74,43,33,85,112,60,43,45,67,64,51,93,100,90,68,51,49,55,63,85,79,44,47,42,55,41,49,45,45,66,73,42,43,93,102,24,26,14,24,42,40,45,49,52,47,169,156,56,35,48,56,48,40,48,60,72,45,61,54,90,98,74,62,21,20,75,64,23,20,26,21,71,74,37,50,79,73,36,32,56,34,48,54,34,48,53,57,25,42,70,79,56,49,48,63…	19,14,7,3,11,13,4,6,2,3,9,4,5,4,9,4,10,19,19,16,5,10,6,3,1,2,5,6,15,8,9,9,11,7,17,7,4,2,9,7,1,4,0,3,7,5,12,9,12,11,8,6,6,7,6,4,6,10,3,6,8,9,3,8,23,15,4,3,10,14,3,1,3,2,0,3,3,8,4,6,18,14,4,6,8,9,5,2,3,3,5,5,2,4,12,14,10,6,0,4,12,6,2,1,2,1,4,6,10,5,7,12,8,4,13,11,8,1,1,2,6,3,4,4,14,11,7,7,11,5,7,7,4,9,2,3,4,5,7,5,5,8,5,3,6,8,5,3,2,7,5,1,2,5,4,5,10,6,8,5,8,13,8,3,4,5,3,6,6,5,5,9,17,12,10,8,19,19,13,…	88,65,123,97,30,39,101,122,97,107,129,125,90,78,129,107,125,138,88,88,162,141,167,188,111,120,140,120,123,108,164,148,185,134,119,134,28,30,51,61,124,107,103,102,9,10,48,61,38,35,103,118	18,17,14,15,4,4,17,16,18,11,21,18,6,5,13,18,24,14,10,14,28,19,17,16,24,13,12,11,28,27,18,23,37,23,32,12,6,5,9,7,12,17,10,14,1,1,19,11,3,9,26,5	99	50	3.09795e-05	0.00230685	0.727,0.791,0.776,0.915,0.788,0.719,0.883,0.805,0.929,0.903,0.755,0.88,0.837,0.88,0.843,0.906,0.774,0.698,0.83,0.847,0.789,0.663,0.839,0.929,0.924,0.91,0.889,0.866,0.798,0.826,0.759,0.733,0.746,0.817,0.728,0.842,0.844,0.893,0.827,0.89,0.968,0.844,1.0,0.919,0.822,0.837,0.797,0.849,0.791,0.757,0.763,0.805,0.822,0.82,0.877,0.909,0.787,0.704,0.876,0.822,0.721,0.733,0.883,0.74,0.592,0.711,0.841,0.879,…	0.712,0.659,0.816,0.766,0.791,0.831,0.75,0.794,0.731,0.831,0.756,0.778,0.883,0.887,0.834,0.75,0.725,0.833,0.816,0.76,0.745,0.789,0.832,0.856,0.7,0.823,0.855,0.846,0.689,0.669,0.821,0.765,0.716,0.746,0.653,0.849,0.702,0.752,0.741,0.815,0.839,0.761,0.839,0.786,0.82,0.835,0.561,0.737,0.865,0.663,0.667,0.923	0.038
11214	ENSG00000166295	ANAPC16	chr10	+	72223887	72224056	72215999	72216072	72230365	72230440	11214	143,146,99,107,140,105,142,169,110,131,155,157,143,187,160,123,189,187,277,276,230,213,204,178,187,199,192,175,127,119,226,192,133,117,121,119,158,180,227,200,163,159,202,192,116,112,181,153,128,132,109,99,143,164,140,144,139,113,233,229,107,128,265,275,118,118,128,130,220,200,83,67,64,65,87,96,179,193,153,160,191,164,141,125,109,82,143,110,91,101,119,142,117,122,106,132,83,77,79,79,176,163,56,56…	19,15,15,10,15,14,25,21,15,16,30,22,30,34,26,41,22,24,35,47,29,27,24,17,34,30,27,22,16,14,27,29,23,17,19,22,15,14,21,35,10,19,37,30,24,12,24,36,37,37,16,12,20,21,38,29,13,14,43,45,20,15,31,27,23,21,19,23,32,34,5,8,10,9,10,21,21,28,15,15,23,25,20,10,12,8,15,13,18,18,22,24,11,22,12,14,10,8,13,7,30,38,4,8,18,9,28,32,8,15,37,35,16,22,40,37,29,40,14,20,17,19,26,23,14,15,18,20,8,11,10,22,15,15,12,12,16…	141,153,136,130,130,116,210,217,154,124,146,142,182,187,130,137,147,141,170,140,119,119,79,83,163,155,162,194,152,112,145,121,165,154,151,143,121,113,115,130,113,101,181,143,101,90,131,123,123,114,199,223	37,30,21,23,6,13,36,41,43,35,26,25,42,29,17,15,29,25,8,27,24,14,12,15,30,39,32,39,26,37,29,34,17,18,15,19,16,24,20,18,15,16,40,40,17,8,22,11,17,19,30,29	100	50	0.000514076	0.0297335	0.79,0.83,0.767,0.843,0.824,0.789,0.74,0.801,0.786,0.804,0.721,0.781,0.704,0.733,0.755,0.6,0.811,0.796,0.798,0.746,0.799,0.798,0.81,0.84,0.733,0.768,0.78,0.799,0.799,0.81,0.807,0.768,0.743,0.775,0.761,0.73,0.84,0.865,0.844,0.741,0.891,0.807,0.732,0.762,0.707,0.824,0.79,0.68,0.634,0.641,0.773,0.805,0.781,0.796,0.648,0.713,0.842,0.801,0.73,0.718,0.728,0.81,0.81,0.836,0.72,0.738,0.771,0.739,0.775,0.…	0.656,0.718,0.764,0.739,0.915,0.817,0.745,0.726,0.642,0.639,0.737,0.74,0.684,0.763,0.793,0.82,0.717,0.738,0.914,0.722,0.713,0.81,0.767,0.735,0.731,0.665,0.717,0.713,0.745,0.602,0.714,0.64,0.829,0.811,0.834,0.79,0.791,0.702,0.742,0.783,0.79,0.759,0.693,0.641,0.748,0.849,0.749,0.848,0.783,0.75,0.768,0.794	0.028
11286	ENSG00000096746	HNRNPH3	chr10	+	68337857	68337996	68337198	68337333	68338502	68338642	11286	158,160,114,98,204,192,117,158,149,148,121,110,188,182,140,156,143,169,113,128,233,219,316,278,192,185,106,92,196,188,208,201,142,153,196,192,246,239,126,126,166,129,66,83,126,104,101,111,245,259,148,127,235,203,81,97,53,32,155,154,75,81,51,55,192,168,168,163,231,210,104,84,68,56,66,49,38,33,92,107,44,48,123,119,75,68,161,192,178,157,83,74,272,311,19,15,9,17,8,15,153,122,39,48,152,142,49,46,179,1…	17,28,17,18,19,29,23,24,22,19,13,30,27,16,26,17,27,29,21,20,27,29,29,38,34,27,43,37,36,21,30,28,35,30,38,39,30,47,20,29,45,38,17,22,27,23,39,24,39,28,34,33,26,24,53,31,17,14,18,22,23,10,22,17,27,37,34,32,54,62,16,13,15,18,9,12,9,10,40,30,11,17,29,24,13,17,24,18,35,29,18,13,35,51,9,3,9,6,1,1,10,20,9,8,31,35,22,23,25,24,41,32,0,1,33,35,18,13,31,38,21,17,25,30,30,32,44,46,8,6,10,2,4,2,30,27,35,27,8,…	32,35,224,247,29,34,99,84,91,66,105,108,145,172,119,156,153,177,77,85,95,104,134,143,122,119,72,44,227,243,99,95,86,114,146,169,44,40,31,29,30,29,121,132,4,9,15,11,28,29,156,107	7,10,28,27,4,4,8,8,23,19,19,7,22,20,30,14,16,12,10,12,19,15,24,27,10,16,12,13,33,25,12,12,18,15,21,15,6,3,3,3,4,3,29,21,2,0,2,3,9,7,25,26	100	50	0.000318666	0.0194917	0.823,0.741,0.77,0.731,0.843,0.768,0.718,0.767,0.772,0.796,0.823,0.647,0.777,0.85,0.729,0.821,0.726,0.744,0.729,0.762,0.812,0.791,0.845,0.785,0.738,0.774,0.552,0.554,0.731,0.817,0.776,0.782,0.67,0.718,0.721,0.711,0.804,0.718,0.759,0.685,0.648,0.629,0.66,0.654,0.7,0.693,0.564,0.698,0.759,0.822,0.685,0.658,0.819,0.809,0.433,0.61,0.609,0.533,0.812,0.778,0.62,0.802,0.537,0.618,0.78,0.694,0.712,0.718,…	0.696,0.636,0.8,0.821,0.784,0.81,0.861,0.84,0.664,0.635,0.734,0.885,0.767,0.811,0.665,0.848,0.827,0.881,0.794,0.78,0.714,0.776,0.736,0.726,0.859,0.788,0.75,0.629,0.775,0.829,0.805,0.798,0.705,0.792,0.777,0.849,0.786,0.87,0.838,0.829,0.789,0.829,0.676,0.759,0.5,1.0,0.789,0.647,0.609,0.674,0.757,0.673	-0.038
11393	ENSG00000204161	TMEM273	chr10	-	49165204	49165361	49160347	49161622	49165765	49165796	11393	1,2,0,3,0,1,5,6,1,1,0,1,2,8,0,0,7,4,0,1,5,3,9,12,0,3,1,1,0,0,0,0,4,1,4,3,0,1,9,11,3,0,0,0,4,2,2,2,0,1,6,0,3,4,2,2,0,0,3,2,2,1,0,2,0,4,6,1,5,3,1,2,0,0,0,2,0,0,1,0,0,0,0,5,0,3,1,2,11,8,0,2,6,2,0,0,0,0,0,0,1,3,1,2,0,0,0,0,1,2,0,1,0,1,1,1,0,0,0,3,1,1,0,1,1,3,2,2,4,1,0,0,1,2,1,3,1,1,6,3,1,1,0,0,1,4,0,1,2,0,4,3,3,1,2,3,5,3,0,0,1,0,1,3,0,2,1,0,1,0,2,3,4,0,0,0,8,7,1,0,0,0,3,3,0,0,1,0,5,2,2,0,0,0,5,4,0,1,…	13,8,15,11,9,13,37,34,15,12,14,20,34,34,11,7,19,16,18,20,55,38,44,45,16,21,21,12,13,8,5,11,14,20,27,35,23,28,41,41,9,7,14,19,36,32,14,12,27,16,25,21,27,26,6,13,9,4,16,14,23,22,8,7,19,13,31,17,32,21,20,22,3,1,10,19,8,4,5,11,5,8,24,18,22,19,10,16,43,42,9,9,22,32,16,11,8,9,2,4,17,16,4,6,4,3,4,3,7,9,22,12,8,10,14,24,13,12,16,10,13,7,10,14,12,11,9,16,2,7,8,8,4,8,30,23,27,21,16,12,28,27,6,6,12,10,2,4,5…	1,0,0,1,0,0,0,2,0,0,0,0,2,2,0,0,1,2,2,1,0,0,0,2,1,0,0,0,3,5,0,1,0,0,0,2,1,0,0,0,0,0,1,0,0,0,0,0,0,0,0,1	19,17,9,14,3,6,14,14,17,13,38,32,14,14,18,16,19,15,21,12,11,13,19,15,18,10,9,10,11,20,28,15,4,2,27,10,21,19,4,3,10,10,10,8,6,3,7,5,4,8,43,43	100	50	1.31006e-14	3.31038e-12	0.037,0.111,0.0,0.12,0.0,0.037,0.063,0.081,0.032,0.04,0.0,0.024,0.029,0.105,0.0,0.0,0.156,0.111,0.0,0.024,0.043,0.038,0.093,0.118,0.0,0.067,0.023,0.04,0.0,0.0,0.0,0.0,0.125,0.024,0.069,0.041,0.0,0.018,0.099,0.118,0.143,0.0,0.0,0.0,0.053,0.03,0.067,0.077,0.0,0.03,0.107,0.0,0.053,0.071,0.143,0.071,0.0,0.0,0.086,0.067,0.042,0.022,0.0,0.125,0.0,0.133,0.088,0.029,0.072,0.067,0.024,0.043,0.0,0.0,0.0,0.…	0.026,0.0,0.0,0.034,0.0,0.0,0.0,0.067,0.0,0.0,0.0,0.0,0.067,0.067,0.0,0.0,0.026,0.062,0.045,0.04,0.0,0.0,0.0,0.062,0.027,0.0,0.0,0.0,0.12,0.111,0.0,0.032,0.0,0.0,0.0,0.091,0.023,0.0,0.0,0.0,0.0,0.0,0.048,0.0,0.0,0.0,0.0,0.0,0.0,0.0,0.0,0.011	0.03
11428	ENSG00000100300	TSPO	chr22	+	43159209	43159420	43151558	43151604	43161051	43161190	11428	210,223,176,175,104,85,161,140,159,128,177,156,111,104,230,211,273,291,438,439,95,64,187,186,103,79,120,138,151,132,157,136,194,198,281,234,86,82,108,126,118,125,130,103,261,264,241,228,308,291,120,93,189,186,165,122,297,290,168,151,165,156,151,130,160,176,96,88,299,290,122,117,64,65,128,161,325,320,159,150,704,732,192,164,382,356,113,115,97,92,273,281,90,90,505,482,539,518,356,356,219,214,43,31,…	41,45,7,18,16,11,7,4,33,25,10,12,15,9,33,29,27,37,26,25,4,11,50,44,5,6,20,23,55,28,9,7,7,11,24,22,9,5,14,8,10,10,5,3,26,23,5,14,19,24,8,7,43,47,30,29,13,19,4,9,16,15,11,14,42,27,10,21,34,39,14,13,8,2,18,12,4,4,16,10,14,22,31,29,51,55,16,13,25,22,15,24,22,14,24,31,22,28,5,2,14,11,8,8,2,4,2,5,16,20,7,8,101,58,5,9,14,14,5,8,9,12,13,7,50,48,38,39,21,17,29,31,71,79,7,8,6,7,9,8,24,25,8,8,38,44,9,4,4,9,…	6.19679e+159	37,40,29,26,36,37,41,28,6,7,57,47,5,2,20,26,17,18,30,24,47,38,15,20,16,15,13,17,35,48,90,70,14,22,29,24,10,5,53,35,46,52,22,20,36,48,20,27,7,14,18,31	100	50	0	0	0.719,0.712,0.926,0.829,0.765,0.794,0.92,0.946,0.707,0.719,0.898,0.867,0.787,0.852,0.777,0.784,0.835,0.797,0.894,0.898,0.922,0.744,0.652,0.679,0.912,0.868,0.75,0.75,0.579,0.702,0.897,0.907,0.933,0.9,0.854,0.842,0.827,0.891,0.794,0.887,0.855,0.862,0.929,0.945,0.834,0.852,0.96,0.891,0.89,0.858,0.882,0.869,0.687,0.664,0.733,0.678,0.92,0.884,0.955,0.893,0.838,0.839,0.873,0.823,0.656,0.765,0.828,0.677…	0.893,0.895,0.819,0.832,0.901,0.892,0.868,0.893,0.96,0.955,0.853,0.869,0.925,0.967,0.92,0.906,0.903,0.897,0.912,0.925,0.844,0.874,0.932,0.911,0.884,0.874,0.959,0.942,0.778,0.687,0.785,0.82,0.978,0.965,0.834,0.861,0.892,0.943,0.855,0.89,0.895,0.883,0.783,0.801,0.854,0.806,0.967,0.955,0.958,0.928,0.918,0.87	-0.052
11583	ENSG00000105698	USF2	chr19	+	35269802	35270003	35269445	35269699	35270446	35270517	11583	54,35,29,27,35,23,38,33,19,16,28,19,30,17,16,15,37,53,45,39,25,25,14,20,16,23,33,23,24,23,26,34,37,24,22,29,16,17,33,32,29,26,9,14,19,17,34,39,40,38,31,20,35,31,26,28,13,11,14,12,24,27,27,27,45,37,18,15,35,30,12,6,11,15,18,21,25,25,26,23,52,52,23,21,20,22,8,10,9,26,14,16,5,14,19,17,31,21,5,4,38,30,7,6,4,8,11,8,17,20,46,35,21,22,41,35,35,33,18,12,25,21,30,18,20,20,37,22,16,27,44,40,26,27,16,13,17,…	14,15,9,10,5,5,3,9,7,6,7,9,8,5,8,8,6,9,14,8,10,3,15,13,5,6,7,7,4,3,12,5,5,9,8,13,5,7,9,5,3,3,4,3,13,8,6,6,10,13,6,9,14,9,6,9,8,6,1,5,4,5,6,9,13,9,10,4,20,9,3,3,5,8,3,7,6,3,9,7,12,15,3,4,9,5,9,7,5,7,18,4,4,13,5,4,8,10,4,3,15,18,3,5,3,5,13,2,5,5,7,14,10,2,5,10,13,11,8,12,7,8,8,5,11,5,10,17,9,9,9,10,11,12,20,14,7,5,5,3,8,9,8,11,16,11,3,6,5,4,6,5,12,6,5,8,12,7,6,4,9,7,12,5,5,1,13,19,12,9,4,11,12,14,8…	37,23,38,41,9,7,94,86,36,48,30,34,46,46,52,56,56,74,29,30,49,38,41,23,55,66,51,40,48,46,53,50,77,70,26,24,18,26,19,29,36,47,60,42,14,13,23,14,19,21,35,31	10,6,8,10,5,8,16,22,13,10,11,11,10,12,8,11,16,14,5,5,19,12,7,3,12,11,6,9,10,7,13,20,18,11,9,6,3,3,5,5,6,6,9,11,4,1,5,5,8,8,8,14	100	50	1.43112e-05	0.00113124	0.659,0.538,0.617,0.574,0.778,0.697,0.864,0.647,0.576,0.571,0.667,0.514,0.652,0.63,0.5,0.484,0.755,0.746,0.616,0.709,0.556,0.806,0.318,0.435,0.615,0.657,0.702,0.622,0.75,0.793,0.52,0.773,0.787,0.571,0.579,0.527,0.615,0.548,0.647,0.762,0.829,0.812,0.529,0.7,0.422,0.515,0.739,0.765,0.667,0.594,0.721,0.526,0.556,0.633,0.684,0.609,0.448,0.478,0.875,0.545,0.75,0.73,0.692,0.6,0.634,0.673,0.474,0.652,0.…	0.649,0.657,0.704,0.672,0.474,0.304,0.746,0.662,0.581,0.706,0.577,0.607,0.697,0.657,0.765,0.718,0.636,0.725,0.744,0.75,0.563,0.613,0.745,0.793,0.696,0.75,0.81,0.69,0.706,0.767,0.671,0.556,0.681,0.761,0.591,0.667,0.75,0.812,0.655,0.744,0.75,0.797,0.769,0.656,0.636,0.867,0.697,0.583,0.543,0.568,0.686,0.525	-0.075
11732	ENSG00000148484	RSU1	chr10	-	16816972	16817084	16782033	16782084	16817314	16817424	11732	131,158,95,82,15,16,147,106,86,76,72,84,109,104,110,113,82,101,64,65,164,145,103,112,112,119,51,65,217,198,80,68,73,66,113,106,115,96,36,36,97,90,52,50,44,36,50,51,106,111,80,50,96,91,80,70,53,50,115,103,119,104,149,155,166,178,59,62,116,90,50,63,37,37,31,22,47,39,111,101,27,30,60,62,57,60,62,52,101,114,28,25,34,48,22,27,18,13,17,7,100,93,28,17,81,99,73,58,41,30,195,184,1,1,84,116,84,55,110,85,36…	6,4,5,6,2,4,9,6,4,3,1,8,6,10,8,2,5,6,7,6,8,6,15,10,10,2,6,3,6,6,18,14,9,6,14,6,3,9,9,5,4,5,6,4,13,12,7,9,5,13,5,5,9,5,8,6,3,3,4,5,5,7,11,9,14,13,6,2,18,15,8,1,2,4,3,5,6,0,4,3,4,4,4,8,4,1,19,5,14,9,1,5,4,2,2,2,0,0,0,0,9,5,2,3,5,7,4,4,7,8,11,6,0,0,9,10,11,1,5,5,6,8,4,9,3,3,4,7,1,1,1,0,0,0,8,7,11,4,8,3,2,1,2,1,4,7,18,11,8,18,3,1,6,5,4,8,1,0,2,7,2,2,4,5,0,1,14,9,7,4,7,7,4,5,3,3,4,5,7,2,6,2,5,11,0,0,0…	25,20,46,56,14,16,82,89,31,37,19,17,62,78,70,65,71,79,43,27,23,35,30,43,32,46,38,36,41,50,37,51,34,38,18,22,16,12,11,5,16,19,42,38,5,5,7,5,6,10,21,45	2,1,5,3,1,2,7,1,5,6,3,1,5,4,17,13,8,7,13,4,8,3,11,4,7,2,3,3,9,6,6,7,9,8,3,5,4,1,1,2,0,0,2,2,0,0,4,6,9,1,19,6	100	50	4.51155e-06	0.000396245	0.916,0.952,0.905,0.872,0.789,0.667,0.891,0.898,0.915,0.927,0.973,0.84,0.901,0.839,0.873,0.966,0.891,0.894,0.821,0.844,0.911,0.924,0.774,0.848,0.848,0.967,0.81,0.915,0.948,0.943,0.69,0.708,0.802,0.846,0.801,0.898,0.95,0.842,0.667,0.783,0.924,0.9,0.812,0.862,0.629,0.6,0.781,0.739,0.914,0.81,0.889,0.833,0.842,0.901,0.833,0.854,0.898,0.893,0.935,0.912,0.922,0.881,0.871,0.896,0.856,0.873,0.831,0.939,…	0.862,0.909,0.821,0.903,0.875,0.8,0.854,0.978,0.756,0.755,0.76,0.895,0.861,0.907,0.673,0.714,0.816,0.849,0.623,0.771,0.59,0.854,0.577,0.843,0.696,0.92,0.864,0.857,0.695,0.806,0.755,0.785,0.654,0.704,0.75,0.688,0.667,0.857,0.846,0.556,1.0,1.0,0.913,0.905,1.0,1.0,0.467,0.294,0.25,0.833,0.356,0.789	0.089
12133	ENSG00000160593	JAML	chr11	-	118214823	118214886	118212406	118212561	118224940	118224994	12133	526,631,408,425,565,522,500,498,871,870,550,585,387,441,611,588,121,115,362,381,279,306,301,307,343,407,211,206,193,205,658,606,525,534,700,714,808,822,640,575,274,266,743,629,967,930,525,505,512,525,384,346,587,511,391,404,140,155,320,281,376,332,116,97,375,361,819,760,1182,1132,482,480,329,299,322,281,304,287,166,201,259,271,778,782,252,242,505,447,737,710,443,406,350,364,276,263,220,183,79,95,…	139,118,86,92,160,136,111,120,210,197,114,99,144,124,179,133,33,49,75,53,93,98,111,126,136,122,89,71,52,50,142,159,119,96,188,179,212,205,96,108,89,73,129,115,198,180,105,112,128,102,96,95,260,235,125,95,44,43,96,79,104,67,21,17,120,100,209,178,274,264,102,105,92,76,84,73,34,40,61,69,47,59,209,220,79,81,153,138,223,203,144,125,141,149,53,43,40,36,17,21,133,159,55,76,178,180,152,150,190,192,150,13…	274,311,690,648,275,242,363,334,516,476,386,375,441,399,846,843,932,896,919,835,892,848,575,598,472,438,861,975,729,702,664,709,493,534,612,559,295,262,158,173,273,264,693,667,47,55,78,60,218,219,439,441	58,50,144,152,79,59,83,94,114,96,75,78,94,87,107,101,205,171,177,191,157,137,102,95,84,106,140,126,195,190,163,169,175,183,128,134,49,47,49,37,48,57,133,129,17,19,28,34,50,56,143,121	100	50	5.62546e-08	6.44691e-06	0.654,0.728,0.703,0.698,0.638,0.657,0.693,0.675,0.675,0.688,0.707,0.747,0.573,0.64,0.631,0.689,0.647,0.54,0.707,0.782,0.6,0.61,0.576,0.549,0.558,0.625,0.542,0.592,0.65,0.672,0.699,0.656,0.688,0.736,0.651,0.666,0.656,0.667,0.769,0.727,0.606,0.646,0.742,0.732,0.709,0.721,0.714,0.693,0.667,0.72,0.667,0.646,0.53,0.521,0.61,0.68,0.614,0.643,0.625,0.64,0.644,0.712,0.734,0.74,0.61,0.643,0.662,0.681,0.68…	0.703,0.757,0.706,0.681,0.635,0.672,0.686,0.64,0.694,0.713,0.72,0.706,0.701,0.696,0.798,0.807,0.694,0.724,0.722,0.686,0.74,0.756,0.738,0.759,0.738,0.674,0.755,0.795,0.651,0.649,0.671,0.677,0.585,0.593,0.705,0.676,0.751,0.736,0.617,0.7,0.74,0.698,0.723,0.721,0.58,0.591,0.582,0.469,0.686,0.662,0.606,0.646	-0.035
12179	ENSG00000090060	PAPOLA	chr14	+	96562818	96562893	96556174	96556413	96564954	96564988	12179	95,124,55,59,78,63,121,93,123,106,63,45,92,84,104,91,81,80,52,76,106,108,109,101,144,98,93,72,117,104,123,118,87,73,89,119,125,147,113,91,104,88,68,81,87,101,84,89,101,94,81,103,109,130,93,100,20,32,87,89,60,66,50,40,55,72,86,105,122,127,48,57,40,46,38,52,21,22,89,99,36,41,61,63,25,24,107,97,103,77,35,33,89,85,15,14,6,7,9,4,66,76,32,25,72,102,41,52,102,92,102,89,6,5,111,114,44,38,109,110,36,31,97…	7,6,4,4,6,9,11,8,11,9,3,1,9,7,11,15,6,7,3,4,2,2,13,9,6,12,13,7,8,6,14,12,1,0,8,5,10,8,9,9,8,3,10,11,13,10,8,11,6,10,13,7,7,13,9,8,1,0,4,4,5,6,3,0,3,9,6,7,19,11,6,6,2,3,6,4,0,1,16,8,4,2,9,9,2,2,14,11,5,6,1,2,3,9,2,0,2,0,1,0,2,2,5,5,7,6,4,5,11,8,8,8,0,0,4,6,0,2,13,5,5,2,9,5,5,4,12,10,3,2,0,0,0,0,2,13,10,11,4,4,0,0,10,8,4,0,10,8,9,5,2,3,11,9,0,3,2,2,6,5,5,5,1,0,2,1,3,5,3,2,9,12,7,9,2,0,7,8,2,3,1,5,1…	18,28,112,101,19,17,19,23,56,64,70,55,66,56,91,85,60,73,65,74,72,69,100,90,32,30,34,36,117,92,45,59,33,26,76,73,7,12,11,9,10,6,42,49,6,9,6,3,12,13,69,50	1,0,8,7,0,0,1,2,6,6,0,4,7,2,8,4,0,3,5,1,8,1,6,0,6,4,7,3,8,8,2,3,4,4,3,1,0,0,0,0,0,0,4,4,0,2,0,1,0,0,8,4	100	50	0.000131433	0.00882749	0.872,0.912,0.873,0.881,0.867,0.778,0.846,0.853,0.848,0.855,0.913,0.957,0.836,0.857,0.825,0.752,0.871,0.851,0.897,0.905,0.964,0.964,0.807,0.849,0.923,0.803,0.782,0.837,0.88,0.897,0.815,0.831,0.978,1.0,0.848,0.922,0.862,0.902,0.863,0.835,0.867,0.936,0.773,0.786,0.77,0.835,0.84,0.802,0.894,0.825,0.757,0.88,0.886,0.833,0.838,0.862,0.909,1.0,0.916,0.918,0.857,0.846,0.893,1.0,0.902,0.8,0.878,0.882,0.7…	0.9,1.0,0.875,0.878,1.0,1.0,0.905,0.852,0.824,0.842,1.0,0.873,0.825,0.933,0.85,0.914,1.0,0.924,0.867,0.974,0.818,0.972,0.893,1.0,0.727,0.789,0.708,0.857,0.88,0.852,0.918,0.908,0.805,0.765,0.927,0.973,1.0,1.0,1.0,1.0,1.0,1.0,0.84,0.86,1.0,0.692,1.0,0.6,1.0,1.0,0.812,0.862	-0.03
12264	ENSG00000150779	TIMM8B	chr11	-	112085966	112086310	112085148	112085462	112086639	112086722	12264	6,5,3,3,7,9,8,10,18,11,6,5,4,7,6,5,7,7,4,4,7,9,11,9,12,13,9,13,2,6,9,10,8,8,9,3,16,16,13,4,4,2,3,8,2,2,4,3,1,4,9,8,4,6,2,3,8,5,1,1,10,5,8,4,8,6,4,4,16,13,4,8,2,2,3,1,5,6,4,6,6,5,2,5,1,2,8,2,7,1,1,2,5,8,4,4,13,6,3,2,5,5,3,6,5,3,2,6,2,4,14,3,10,8,2,4,5,2,7,5,8,4,11,9,5,6,6,8,4,2,11,6,5,5,5,9,8,4,9,11,14,6,3,5,1,4,5,4,8,4,11,7,7,7,11,7,7,6,15,6,8,8,5,4,8,5,9,7,4,7,6,1,5,10,8,11,9,8,14,10,11,11,10,6,…	65,72,33,43,45,43,43,63,48,28,54,58,60,60,39,30,55,45,79,60,51,69,29,32,86,76,41,48,24,15,68,75,46,52,71,45,54,45,49,41,25,33,38,55,41,31,31,46,65,64,23,31,26,30,41,44,55,54,46,51,27,40,30,27,78,81,40,33,114,109,44,52,19,21,46,34,69,67,35,43,41,52,44,55,31,36,40,49,26,27,71,59,31,23,62,73,81,94,83,88,76,64,18,22,34,24,44,49,37,37,57,57,157,166,33,25,75,90,70,65,64,45,51,52,35,32,51,41,110,106,130…	4,1,5,3,2,6,6,10,0,2,2,8,4,6,10,4,6,7,8,6,6,6,7,6,5,4,4,9,6,7,10,4,6,5,1,5,5,3,10,2,9,14,6,2,1,3,9,5,3,5,7,3	71,58,40,51,101,87,118,104,52,53,63,54,60,53,129,117,80,62,51,47,92,87,25,24,62,61,92,83,71,58,105,105,115,92,37,34,78,66,78,85,78,68,46,55,111,95,110,94,88,79,92,100	100	50	8.9817e-14	2.09764e-11	0.044,0.034,0.043,0.034,0.072,0.095,0.085,0.074,0.158,0.164,0.053,0.041,0.032,0.055,0.071,0.077,0.06,0.072,0.025,0.032,0.064,0.061,0.159,0.123,0.065,0.079,0.099,0.119,0.04,0.167,0.062,0.062,0.08,0.071,0.06,0.032,0.129,0.151,0.117,0.047,0.074,0.029,0.038,0.068,0.024,0.031,0.061,0.032,0.008,0.03,0.164,0.114,0.071,0.091,0.024,0.033,0.068,0.044,0.011,0.01,0.156,0.059,0.118,0.069,0.049,0.036,0.048,0.0…	0.027,0.009,0.059,0.029,0.01,0.033,0.025,0.046,0.0,0.019,0.016,0.069,0.032,0.054,0.037,0.017,0.036,0.053,0.073,0.06,0.032,0.033,0.123,0.111,0.039,0.032,0.021,0.051,0.041,0.057,0.045,0.019,0.025,0.026,0.013,0.068,0.031,0.022,0.06,0.012,0.055,0.093,0.061,0.018,0.004,0.016,0.039,0.026,0.017,0.031,0.037,0.015	0.023
12318	ENSG00000196954	CASP4	chr11	-	104950924	104951098	104949401	104949777	104954746	104955001	12318	464,484,247,226,926,997,369,365,1375,1282,403,381,273,287,498,463,315,385,518,500,271,302,363,356,876,896,635,616,394,414,401,388,313,326,398,380,408,391,486,504,930,876,385,356,609,549,404,428,328,344,530,538,569,574,682,722,383,380,521,532,491,447,99,87,412,419,351,419,724,659,309,317,256,261,564,570,279,264,577,485,554,518,716,709,715,634,435,395,950,946,684,693,571,576,637,570,353,354,98,83,5…	1,4,3,1,2,3,13,7,12,11,1,3,2,3,1,3,3,3,1,3,11,8,3,1,11,4,12,8,4,8,5,2,0,1,4,3,4,1,1,2,5,8,3,1,7,7,6,2,1,7,6,4,4,2,5,7,0,3,6,10,6,6,29,34,1,3,2,4,3,6,1,1,0,2,5,5,9,8,3,6,6,3,3,4,6,5,5,4,12,14,6,15,10,6,1,3,4,3,1,2,3,10,1,1,5,2,19,15,33,25,2,5,1,0,8,4,8,6,2,3,4,3,2,5,4,2,3,5,1,0,0,0,3,3,3,1,2,1,0,3,3,0,3,3,2,0,12,6,2,8,4,6,8,4,2,0,0,0,0,0,1,2,0,0,1,1,3,0,5,1,13,12,3,1,0,0,0,1,0,4,5,1,2,4,0,0,0,1,5,…	7.69751e+161	0,4,0,3,5,5,3,0,10,3,1,0,5,9,3,0,4,3,8,5,3,2,2,2,0,2,2,2,1,2,2,6,6,8,7,6,5,1,6,13,11,10,3,2,0,1,1,3,0,0,3,3	100	50	2.06225e-06	0.000186437	0.996,0.984,0.976,0.991,0.996,0.994,0.934,0.963,0.983,0.983,0.995,0.984,0.986,0.98,0.996,0.987,0.981,0.985,0.996,0.988,0.925,0.95,0.984,0.994,0.976,0.991,0.964,0.975,0.98,0.963,0.976,0.99,1.0,0.994,0.98,0.984,0.981,0.995,0.996,0.992,0.989,0.982,0.985,0.994,0.978,0.975,0.971,0.991,0.994,0.961,0.978,0.985,0.986,0.993,0.986,0.981,1.0,0.984,0.977,0.964,0.976,0.974,0.631,0.561,0.995,0.986,0.989,0.981,…	1.0,0.989,1.0,0.991,0.984,0.985,0.988,1.0,0.963,0.988,0.997,1.0,0.984,0.969,0.991,1.0,0.991,0.993,0.981,0.989,0.995,0.997,0.996,0.996,1.0,0.991,0.991,0.988,0.996,0.993,0.996,0.987,0.984,0.978,0.99,0.992,0.976,0.995,0.968,0.926,0.971,0.973,0.989,0.993,1.0,0.987,0.996,0.99,1.0,1.0,0.993,0.993	-0.009
12350	ENSG00000087460	GNAS	chr20	+	58899948	58900030	58898940	58898985	58903530	58903585	12350	6,4,4,5,8,7,3,9,2,1,2,6,15,4,2,1,9,7,8,5,14,8,3,5,6,7,7,5,2,4,12,11,2,3,4,2,5,3,3,2,12,2,2,2,0,4,6,8,5,5,2,0,5,3,2,1,4,4,6,8,10,7,6,13,10,4,2,6,7,9,3,5,2,5,0,1,2,5,3,5,4,5,2,6,1,1,3,1,3,1,5,2,4,5,3,3,0,0,1,0,5,12,2,0,3,4,3,3,3,5,7,8,5,3,3,3,8,13,10,5,3,8,1,2,3,1,3,5,4,3,3,5,0,0,5,1,0,1,1,3,3,3,1,3,10,3,4,7,7,3,3,2,0,7,1,4,2,1,3,0,5,6,2,5,4,2,4,8,6,5,3,6,2,2,2,1,1,0,6,2,1,2,5,11,0,0,3,1,13,1,1,1,1…	121,135,96,92,88,77,134,101,107,112,175,157,171,161,143,139,125,155,155,141,127,143,76,91,115,116,112,112,176,182,169,173,117,98,132,125,94,96,85,102,168,140,60,67,100,77,92,69,132,153,71,85,82,70,82,75,49,63,118,154,81,106,262,220,133,134,132,128,176,147,73,75,37,57,41,41,53,55,115,108,110,132,128,88,88,74,106,108,103,77,65,66,61,67,74,73,52,59,23,27,163,160,31,30,85,70,93,69,183,164,161,170,14,…	1,0,1,0,1,1,5,5,3,1,0,2,3,14,3,6,2,3,4,2,2,3,2,0,7,5,0,1,3,3,7,1,8,1,1,1,0,0,0,2,3,0,1,1,2,0,2,2,2,0,2,0	55,43,116,91,55,48,176,153,81,99,76,73,129,133,122,117,132,140,143,149,103,100,98,110,102,90,70,57,146,125,107,119,114,118,103,115,34,34,23,23,57,83,115,100,0,4,57,62,38,31,66,87	100	50	0.000267859	0.0166819	0.024,0.015,0.02,0.026,0.043,0.043,0.011,0.043,0.009,0.004,0.006,0.019,0.042,0.012,0.007,0.004,0.035,0.022,0.025,0.017,0.052,0.027,0.019,0.027,0.025,0.029,0.03,0.022,0.006,0.011,0.034,0.031,0.008,0.015,0.015,0.008,0.026,0.015,0.017,0.01,0.034,0.007,0.016,0.015,0.0,0.025,0.032,0.055,0.019,0.016,0.014,0.0,0.03,0.021,0.012,0.007,0.039,0.031,0.025,0.025,0.058,0.032,0.011,0.029,0.036,0.015,0.008,0.023…	0.009,0.0,0.004,0.0,0.009,0.01,0.014,0.016,0.018,0.005,0.0,0.014,0.011,0.05,0.012,0.025,0.008,0.011,0.014,0.007,0.01,0.015,0.01,0.0,0.033,0.027,0.0,0.009,0.01,0.012,0.032,0.004,0.034,0.004,0.005,0.004,0.0,0.0,0.0,0.042,0.026,0.0,0.004,0.005,1.0,0.0,0.017,0.016,0.026,0.0,0.015,0.0	-0.01
12461	ENSG00000011243	AKAP8L	chr19	-	15398629	15398703	15397713	15397855	15399301	15399410	12461	1,7,4,9,6,2,5,6,1,2,8,5,3,4,3,3,4,3,12,9,12,5,3,4,8,11,9,0,2,1,11,11,4,3,5,12,6,11,4,4,7,7,4,0,3,8,3,7,8,14,6,4,5,4,2,3,8,1,6,5,6,6,0,1,3,4,2,7,6,5,6,4,2,3,4,8,7,9,6,2,7,5,7,6,2,6,4,3,1,2,2,7,0,6,0,8,4,6,2,1,8,12,0,0,3,1,9,7,1,0,9,5,14,9,8,5,7,5,13,6,4,3,6,3,5,0,7,7,9,8,6,5,8,12,5,6,5,6,10,7,5,4,9,8,5,3,1,2,7,4,3,4,4,1,12,12,1,5,6,7,8,8,6,5,3,4,3,8,6,4,2,2,7,6,8,13,7,4,11,5,14,19,2,2,4,6,2,1,3,12…	44,39,20,29,31,32,49,25,28,23,33,40,40,43,37,38,44,33,27,51,49,47,41,42,58,58,43,48,32,48,46,59,35,20,36,45,54,46,48,39,42,32,36,34,45,34,49,33,32,47,41,31,40,36,51,46,35,24,40,40,18,22,30,34,43,56,40,42,54,42,35,35,16,29,29,27,40,35,33,30,43,47,47,49,47,54,39,38,52,41,62,68,76,65,63,70,54,52,21,10,82,71,24,13,20,21,51,36,45,39,46,35,52,35,44,41,40,61,39,40,29,42,56,50,47,27,40,50,56,50,35,37,37,…	2,6,16,6,6,10,25,14,23,9,4,7,15,12,17,11,19,18,6,4,7,8,5,6,21,18,2,6,6,6,4,10,9,7,13,13,18,19,3,5,11,15,9,9,11,9,5,3,22,13,13,10	49,43,59,59,41,50,72,62,49,39,45,24,55,37,27,30,49,28,54,35,37,42,38,28,28,35,48,66,44,43,50,51,27,42,38,49,68,59,47,44,40,38,51,72,15,13,33,46,58,47,48,38	100	50	1.11022e-16	3.45717e-14	0.011,0.082,0.091,0.134,0.088,0.03,0.049,0.107,0.018,0.042,0.108,0.059,0.036,0.044,0.039,0.038,0.043,0.043,0.182,0.081,0.109,0.051,0.035,0.045,0.065,0.087,0.095,0.0,0.03,0.01,0.107,0.085,0.054,0.07,0.065,0.118,0.053,0.107,0.04,0.049,0.077,0.099,0.053,0.0,0.032,0.105,0.03,0.096,0.111,0.13,0.068,0.061,0.059,0.053,0.019,0.032,0.103,0.02,0.07,0.059,0.143,0.12,0.0,0.014,0.034,0.034,0.024,0.077,0.053,0…	0.02,0.065,0.119,0.048,0.068,0.091,0.148,0.101,0.19,0.103,0.043,0.127,0.12,0.14,0.239,0.155,0.162,0.243,0.053,0.054,0.086,0.087,0.062,0.097,0.273,0.205,0.02,0.043,0.064,0.065,0.038,0.089,0.143,0.077,0.146,0.117,0.117,0.139,0.031,0.054,0.121,0.165,0.081,0.059,0.268,0.257,0.07,0.032,0.159,0.121,0.119,0.116	-0.043
12544	ENSG00000149269	PAK1	chr11	-	77325327	77325376	77322947	77323360	77332729	77332867	12544	30,41,10,15,23,24,29,33,31,37,23,20,33,21,40,37,11,12,23,20,21,17,34,10,23,24,7,8,20,17,33,29,36,32,41,19,34,49,16,13,12,11,23,26,33,40,7,8,35,45,22,15,33,31,12,12,7,9,8,14,9,15,1,2,22,20,20,20,27,34,23,25,10,11,12,6,7,3,11,8,9,7,19,20,19,13,27,26,36,26,25,16,23,32,10,5,21,21,1,6,23,27,16,7,24,14,18,18,13,18,11,21,7,15,18,20,25,16,28,35,19,20,21,32,22,17,23,29,28,16,13,15,10,12,17,19,43,33,12,12,…	146,129,87,77,147,119,133,128,130,138,141,155,121,114,158,153,55,66,142,124,81,81,68,76,123,127,61,45,89,80,124,123,134,136,146,150,189,159,142,152,100,96,164,178,145,148,103,110,116,132,141,125,128,93,98,89,46,40,74,70,87,61,60,45,109,116,109,103,177,197,117,112,82,76,67,70,61,56,56,54,53,67,151,124,68,75,131,130,140,122,126,131,174,123,94,81,93,87,30,40,232,219,77,69,113,131,140,130,149,145,81,…	19,16,34,50,31,18,26,27,19,32,20,14,27,33,41,33,57,47,36,37,39,35,10,17,23,13,13,28,38,26,36,25,24,25,31,42,29,22,17,26,32,36,33,35,5,11,4,13,9,6,26,34	84,90,145,127,90,64,68,79,137,155,112,97,117,123,106,94,204,212,141,130,167,135,102,112,109,107,172,158,157,143,150,145,190,192,129,126,125,122,63,56,135,131,178,156,45,50,45,19,90,72,126,131	99	50	0.000204386	0.0131541	0.094,0.138,0.055,0.09,0.073,0.092,0.099,0.115,0.107,0.119,0.076,0.061,0.121,0.085,0.113,0.109,0.092,0.084,0.076,0.075,0.116,0.096,0.202,0.062,0.086,0.087,0.055,0.082,0.102,0.097,0.118,0.106,0.119,0.106,0.124,0.06,0.083,0.135,0.054,0.041,0.057,0.055,0.066,0.069,0.103,0.12,0.033,0.035,0.132,0.147,0.073,0.057,0.115,0.144,0.058,0.064,0.071,0.102,0.052,0.092,0.05,0.11,0.008,0.022,0.093,0.08,0.085,0.0…	0.103,0.082,0.106,0.166,0.148,0.124,0.162,0.147,0.065,0.094,0.083,0.068,0.104,0.119,0.163,0.151,0.124,0.101,0.114,0.126,0.106,0.116,0.047,0.071,0.096,0.058,0.037,0.082,0.109,0.084,0.108,0.08,0.06,0.062,0.108,0.144,0.105,0.083,0.12,0.19,0.107,0.122,0.086,0.102,0.053,0.1,0.043,0.257,0.048,0.04,0.094,0.116	-0.015
12962	ENSG00000168071	CCDC88B	chr11	+	64354003	64354170	64353714	64353813	64355193	64355400	12962	36,30,40,28,40,50,25,20,11,11,27,24,24,20,25,18,42,26,67,67,12,13,22,36,4,15,20,15,24,27,14,26,36,51,38,47,13,9,23,17,13,9,6,3,19,14,28,20,45,39,15,15,23,38,21,19,16,21,20,14,16,12,16,20,44,60,15,18,48,53,25,27,11,12,18,19,14,18,13,12,42,47,20,31,32,27,13,11,19,16,37,26,9,10,72,50,135,139,14,15,28,33,14,7,6,7,8,5,25,13,48,30,211,226,22,27,44,57,16,9,33,34,14,9,51,48,31,32,67,57,73,73,150,146,16,2…	2,1,4,1,1,0,0,0,0,0,0,0,1,0,0,0,0,1,3,1,0,2,0,0,0,0,0,0,0,0,0,0,1,0,2,0,0,0,0,0,0,0,0,0,0,0,3,1,1,0,1,0,2,1,0,0,3,1,0,0,1,1,0,0,0,1,0,0,1,1,0,0,0,0,2,0,0,1,0,0,1,5,0,0,0,0,0,0,0,0,0,0,1,0,2,0,2,2,0,0,0,2,0,1,0,0,0,1,0,0,3,0,2,11,1,0,0,2,0,0,0,0,0,0,0,1,2,1,2,0,0,1,4,4,0,0,1,0,0,0,2,0,0,1,3,2,0,0,1,0,0,0,0,0,0,1,2,1,0,0,0,0,2,2,1,0,2,1,1,0,0,1,1,3,1,0,0,3,3,2,7,6,1,4,1,3,3,1,6,2,1,4,2,3,1,2,0,0,1,1	96,72,48,53,70,80,89,102,52,69,117,109,46,50,49,47,75,65,29,48,67,78,43,30,93,104,103,114,59,67,129,119,69,62,44,39,48,61,165,170,310,296,73,76,160,153,82,58,77,107,70,61	3,1,2,0,1,2,5,5,1,0,2,0,4,1,0,0,0,3,2,0,2,1,2,2,3,3,5,2,0,0,1,3,1,4,0,0,0,4,5,4,21,28,0,0,8,1,4,4,4,3,1,3	100	50	0	0	0.9,0.938,0.833,0.933,0.952,1.0,1.0,1.0,1.0,1.0,1.0,1.0,0.923,1.0,1.0,1.0,1.0,0.929,0.918,0.971,1.0,0.765,1.0,1.0,1.0,1.0,1.0,1.0,1.0,1.0,1.0,1.0,0.947,1.0,0.905,1.0,1.0,1.0,1.0,1.0,1.0,1.0,1.0,1.0,1.0,1.0,0.824,0.909,0.957,1.0,0.882,1.0,0.852,0.95,1.0,1.0,0.727,0.913,1.0,1.0,0.889,0.857,1.0,1.0,1.0,0.968,1.0,1.0,0.96,0.964,1.0,1.0,1.0,1.0,0.818,1.0,1.0,0.9,1.0,1.0,0.955,0.825,1.0,1.0,1.0,1.0,1.0…	0.941,0.973,0.923,1.0,0.972,0.952,0.899,0.911,0.963,1.0,0.967,1.0,0.852,0.962,1.0,1.0,1.0,0.915,0.879,1.0,0.944,0.975,0.915,0.882,0.939,0.945,0.912,0.966,1.0,1.0,0.985,0.952,0.972,0.886,1.0,1.0,1.0,0.884,0.943,0.955,0.881,0.841,1.0,1.0,0.909,0.987,0.911,0.879,0.906,0.947,0.972,0.91	0.013
12964	ENSG00000126432	PRDX5	chr11	+	64320660	64320792	64319733	64319868	64320864	64320903	12964	468,570,457,494,633,572,426,413,452,454,577,485,463,499,582,599,465,494,1269,1273,368,357,421,408,493,386,499,513,496,429,466,481,410,440,549,587,371,345,520,435,494,457,365,353,478,448,439,476,984,891,321,342,597,577,624,608,651,679,371,416,522,496,581,549,845,787,418,402,968,1012,610,550,243,239,540,492,912,862,539,545,806,702,447,478,971,964,406,397,465,439,655,681,403,414,1243,1249,1583,1516,…	9,11,2,5,3,8,5,6,8,6,11,3,6,9,4,7,3,2,10,15,5,5,5,5,4,6,7,5,4,3,8,4,3,2,12,7,5,5,15,7,8,4,7,6,16,10,6,7,3,14,7,6,9,9,16,11,4,3,7,6,7,6,12,6,15,7,5,9,20,14,9,8,3,4,7,5,6,9,9,8,12,4,12,4,3,12,11,4,12,15,3,4,10,2,14,11,15,11,8,8,3,7,3,2,4,6,3,4,4,4,6,4,26,39,2,5,14,8,9,12,5,7,13,9,6,9,10,11,17,11,10,23,44,46,4,6,1,4,7,9,5,8,4,5,8,4,9,6,11,14,9,7,12,5,6,4,12,14,8,9,11,4,12,10,4,7,7,6,2,4,4,6,10,11,7,…	1.56815e+186	11,18,9,7,17,16,7,19,13,8,12,8,4,5,22,22,13,9,11,12,12,13,4,7,4,4,30,26,8,13,16,13,5,12,4,9,3,2,13,21,17,20,4,6,4,5,13,19,16,10,7,7	100	50	0.000469772	0.0274803	0.963,0.963,0.991,0.98,0.991,0.973,0.977,0.972,0.966,0.974,0.963,0.988,0.975,0.965,0.986,0.977,0.987,0.992,0.984,0.977,0.974,0.973,0.977,0.976,0.984,0.97,0.973,0.981,0.984,0.986,0.967,0.984,0.986,0.991,0.958,0.977,0.974,0.972,0.945,0.969,0.969,0.983,0.963,0.967,0.937,0.957,0.973,0.971,0.994,0.97,0.958,0.966,0.971,0.97,0.951,0.965,0.988,0.991,0.964,0.972,0.974,0.976,0.96,0.979,0.966,0.983,0.977,0.…	0.986,0.977,0.979,0.981,0.981,0.98,0.99,0.973,0.974,0.984,0.976,0.983,0.986,0.983,0.96,0.959,0.973,0.982,0.98,0.977,0.978,0.974,0.985,0.976,0.99,0.99,0.959,0.965,0.976,0.964,0.979,0.982,0.992,0.983,0.984,0.967,0.994,0.996,0.984,0.974,0.977,0.973,0.988,0.983,0.994,0.992,0.98,0.972,0.971,0.982,0.987,0.987	-0.006
12973	ENSG00000149761	NUDT22	chr11	+	64227567	64227666	64226634	64227132	64229246	64229344	12973	21,24,12,9,27,14,13,10,5,9,20,17,18,25,7,8,29,20,32,39,13,13,12,11,11,8,15,13,9,2,19,20,18,11,21,27,7,6,4,6,14,5,2,1,5,5,18,11,17,23,17,15,9,20,8,6,17,15,9,7,12,9,1,4,32,35,7,12,38,29,10,8,5,2,11,7,26,19,16,15,35,31,9,4,23,22,2,3,5,7,24,14,3,3,22,25,68,51,18,14,21,25,5,2,4,5,5,15,4,5,38,30,90,93,16,17,39,28,6,5,9,25,10,5,17,10,30,20,25,31,33,32,90,66,14,6,11,11,5,18,36,46,14,16,18,23,4,10,11,9,14…	0,0,0,1,0,1,3,0,1,0,1,0,1,0,2,0,2,0,2,2,1,0,0,1,0,0,1,1,0,0,1,1,1,2,0,0,0,0,1,1,0,0,0,0,0,0,1,0,0,0,0,0,0,3,2,0,1,0,0,0,0,1,0,0,0,2,2,0,2,2,0,0,0,0,2,0,0,1,0,1,4,3,0,0,1,1,0,0,1,0,0,0,0,0,0,1,2,1,1,0,1,0,0,0,0,0,0,0,0,0,3,0,1,2,0,0,1,0,0,1,2,2,0,1,0,1,1,1,3,2,3,2,1,3,0,1,0,0,0,0,0,1,1,1,3,1,0,0,0,1,0,0,1,1,2,0,1,1,3,1,2,1,1,2,1,1,1,2,0,0,0,1,2,1,0,4,0,2,3,4,7,3,0,1,0,2,7,1,6,2,0,0,1,4,2,2,2,0,2,3	64,58,23,40,69,62,118,88,29,43,53,59,21,41,21,27,44,42,35,21,24,38,18,23,54,46,43,49,36,17,54,48,69,60,38,34,41,28,87,83,81,104,43,38,97,93,89,62,65,57,42,45	2,13,0,1,3,0,4,3,0,3,3,1,1,1,3,1,4,4,0,1,2,4,0,0,1,2,2,2,1,2,4,0,5,2,0,1,3,1,4,6,8,5,0,1,10,7,2,2,0,1,1,0	100	50	0	0	1.0,1.0,1.0,0.818,1.0,0.875,0.684,1.0,0.714,1.0,0.909,1.0,0.9,1.0,0.636,1.0,0.879,1.0,0.889,0.907,0.867,1.0,1.0,0.846,1.0,1.0,0.882,0.867,1.0,1.0,0.905,0.909,0.9,0.733,1.0,1.0,1.0,1.0,0.667,0.75,1.0,1.0,1.0,1.0,1.0,1.0,0.9,1.0,1.0,1.0,1.0,1.0,1.0,0.769,0.667,1.0,0.895,1.0,1.0,1.0,1.0,0.818,1.0,1.0,1.0,0.897,0.636,1.0,0.905,0.879,1.0,1.0,1.0,1.0,0.733,1.0,1.0,0.905,1.0,0.882,0.814,0.838,1.0,1.0,0.…	0.941,0.69,1.0,0.952,0.92,1.0,0.937,0.936,1.0,0.878,0.898,0.967,0.913,0.953,0.778,0.931,0.846,0.84,1.0,0.913,0.857,0.826,1.0,1.0,0.964,0.92,0.915,0.925,0.947,0.81,0.871,1.0,0.873,0.938,1.0,0.944,0.872,0.933,0.916,0.874,0.835,0.912,1.0,0.95,0.829,0.869,0.957,0.939,1.0,0.966,0.955,1.0	0.001
12983	ENSG00000072518	MARK2	chr11	+	63906087	63906114	63904785	63905043	63908259	63908304	12983	4,2,0,3,1,2,2,2,3,3,0,1,1,1,5,4,0,0,3,4,0,4,2,5,1,1,2,2,4,0,5,4,1,4,0,3,2,3,3,1,3,4,1,1,0,1,1,2,4,4,4,1,4,1,1,1,3,8,1,0,0,3,0,1,2,3,0,4,2,3,1,1,0,0,0,1,2,0,2,1,1,2,0,1,2,1,1,1,1,3,1,2,4,0,0,2,0,0,0,0,3,2,0,0,2,0,1,1,3,1,1,5,0,0,9,4,3,1,1,3,3,4,5,12,1,0,1,0,0,1,0,0,3,4,1,1,1,2,2,0,3,1,2,5,1,2,6,3,4,4,3,0,2,4,3,4,0,1,6,2,1,0,3,3,2,1,1,1,2,1,5,4,4,1,2,1,2,0,0,3,1,4,0,0,2,0,1,0,0,2,1,3,1,1,2,1,7,4,4,0	28,36,7,19,32,32,20,22,16,21,28,9,17,10,27,16,25,28,33,42,19,15,14,15,7,11,23,29,24,18,9,14,24,8,22,23,19,15,30,33,24,25,9,14,22,16,18,26,28,25,20,10,27,31,27,21,20,10,9,12,9,14,8,12,20,31,11,13,39,25,11,14,2,6,11,12,21,11,19,11,39,39,21,27,24,18,11,15,19,19,14,15,9,15,15,14,8,14,5,6,18,13,5,8,6,8,14,18,24,22,24,25,9,14,18,11,18,24,16,9,14,14,16,9,17,22,24,26,18,21,29,23,8,16,19,13,16,10,12,13,15…	3,1,4,1,2,2,0,0,2,2,5,3,1,4,7,2,4,4,4,1,4,3,3,1,1,5,2,2,5,3,4,1,2,1,6,4,0,0,5,1,4,4,2,3,0,0,1,0,2,6,2,4	22,20,24,21,16,12,19,28,29,33,43,23,16,17,34,17,30,32,26,19,47,39,34,28,34,22,36,20,27,40,33,39,53,40,33,30,9,11,11,9,35,23,29,20,2,2,10,11,15,14,26,33	77	50	4.66294e-14	1.10576e-11	0.085,0.035,0.0,0.093,0.02,0.039,0.061,0.056,0.109,0.085,0.0,0.067,0.037,0.061,0.107,0.14,0.0,0.0,0.056,0.058,0.0,0.148,0.085,0.178,0.085,0.056,0.053,0.043,0.098,0.0,0.265,0.156,0.026,0.245,0.0,0.078,0.064,0.115,0.061,0.019,0.075,0.094,0.067,0.044,0.0,0.039,0.035,0.048,0.085,0.094,0.115,0.061,0.088,0.021,0.023,0.03,0.089,0.342,0.067,0.0,0.0,0.122,0.0,0.051,0.061,0.059,0.0,0.167,0.032,0.072,0.056,…	0.081,0.031,0.098,0.03,0.075,0.098,0.0,0.0,0.043,0.038,0.07,0.078,0.039,0.133,0.118,0.071,0.08,0.075,0.091,0.033,0.052,0.048,0.054,0.023,0.019,0.129,0.035,0.061,0.107,0.046,0.073,0.016,0.024,0.016,0.106,0.08,0.0,0.0,0.228,0.067,0.069,0.101,0.043,0.089,0.0,0.0,0.061,0.0,0.08,0.218,0.048,0.073	0.008
13057	ENSG00000167985	SDHAF2	chr11	+	61436760	61436960	61430041	61430182	61437624	61437848	13057	9,6,5,2,3,3,12,10,9,8,0,7,7,3,15,7,9,15,9,8,8,6,21,11,9,10,8,3,12,6,6,5,4,6,5,8,4,8,6,3,4,12,1,1,12,19,5,3,12,8,16,7,9,11,2,7,2,4,6,4,8,5,3,5,13,9,4,10,4,6,8,6,1,5,3,6,6,3,13,14,4,7,5,8,8,11,5,13,5,10,7,4,12,7,10,6,8,3,3,5,3,12,4,8,11,4,5,1,6,3,11,17,1,1,6,10,10,7,6,9,5,9,14,6,2,11,9,9,8,9,5,9,1,4,17,6,8,17,2,5,13,10,9,10,8,16,13,3,1,3,7,3,6,9,9,1,3,4,10,10,8,9,4,3,2,1,4,4,8,11,4,6,6,9,7,11,18,10…	135,106,55,64,72,76,120,102,94,105,87,86,142,133,68,85,70,93,98,108,105,119,87,62,133,154,116,94,95,88,136,138,77,62,82,105,117,120,74,74,92,87,125,124,86,84,74,97,89,81,87,64,96,84,69,96,72,63,82,98,62,84,122,105,89,75,76,76,119,133,85,80,49,59,68,71,57,66,101,99,83,100,86,82,76,77,88,106,100,84,73,64,115,121,74,81,35,47,23,20,97,126,51,40,79,85,95,66,68,61,126,123,32,40,99,81,97,76,129,118,74,8…	5,4,20,8,4,3,9,5,1,2,3,4,7,13,8,4,6,5,7,4,6,9,3,3,5,2,4,2,8,7,8,4,9,0,9,5,10,6,1,4,1,3,6,10,1,3,2,2,3,3,7,8	44,45,80,75,33,33,105,136,110,69,67,40,88,116,93,108,101,114,87,96,91,85,101,70,118,96,40,59,118,82,99,83,77,68,107,97,38,42,46,67,88,67,94,110,18,26,44,45,44,32,97,91	100	50	0.000790775	0.0441704	0.032,0.028,0.043,0.015,0.02,0.019,0.048,0.047,0.046,0.037,0.0,0.039,0.024,0.011,0.099,0.04,0.06,0.075,0.044,0.036,0.037,0.025,0.108,0.081,0.033,0.031,0.033,0.016,0.059,0.033,0.022,0.018,0.025,0.046,0.03,0.037,0.017,0.032,0.039,0.02,0.021,0.065,0.004,0.004,0.065,0.102,0.033,0.015,0.063,0.047,0.084,0.052,0.045,0.061,0.014,0.035,0.014,0.031,0.035,0.02,0.061,0.029,0.012,0.023,0.068,0.057,0.026,0.062…	0.054,0.043,0.111,0.051,0.057,0.043,0.041,0.018,0.005,0.014,0.022,0.048,0.038,0.053,0.041,0.018,0.029,0.021,0.039,0.02,0.032,0.05,0.015,0.021,0.021,0.01,0.048,0.017,0.033,0.041,0.039,0.024,0.055,0.0,0.04,0.025,0.116,0.067,0.011,0.029,0.006,0.022,0.031,0.043,0.027,0.055,0.022,0.022,0.033,0.045,0.035,0.042	0.007
13132	ENSG00000110077	MS4A6A	chr11	-	60178259	60178316	60175401	60175611	60181580	60181666	13132	619,603,262,275,252,219,449,418,357,328,297,282,237,219,415,392,251,265,401,438,278,264,326,326,490,475,265,278,201,204,634,587,322,321,436,454,585,589,215,195,360,354,723,720,563,590,498,501,411,446,258,286,481,449,505,461,460,470,558,575,393,410,233,249,314,306,235,219,578,506,259,202,186,136,318,308,533,476,379,337,446,420,493,444,265,241,424,401,413,371,295,267,244,208,313,336,256,253,224,222…	4,3,1,5,2,0,6,3,6,9,6,5,4,2,4,6,3,4,6,2,4,5,8,3,8,8,4,7,5,10,4,6,7,3,7,11,15,5,2,2,0,1,7,6,9,6,8,8,10,7,2,4,21,15,4,6,9,5,3,7,4,3,2,3,7,9,2,3,18,15,0,0,0,1,12,5,3,3,7,8,8,1,11,14,3,1,6,9,9,7,1,1,6,4,2,4,3,5,0,0,4,8,1,4,2,0,4,4,5,1,6,6,0,1,3,5,4,2,5,9,7,5,4,7,7,1,7,0,1,4,5,5,3,6,1,4,3,1,8,2,2,6,12,14,13,13,7,15,11,5,2,3,2,4,6,2,2,10,7,8,4,6,20,9,3,5,3,2,5,5,5,5,6,5,1,6,5,5,2,0,1,1,1,0,6,3,0,0,5,2,…	508,411,375,341,201,198,812,809,420,410,373,352,216,209,526,582,462,405,471,463,597,559,520,493,296,253,533,526,464,434,534,514,1094,1026,360,395,229,276,218,198,297,257,451,420,112,99,287,235,179,179,596,593	8,6,2,5,1,0,5,3,1,3,2,2,2,5,12,5,1,0,2,1,8,1,5,3,1,2,7,5,5,6,10,9,14,8,1,1,0,1,2,1,2,1,2,3,0,0,7,4,3,2,7,7	100	50	2.40545e-09	3.35544e-07	0.987,0.99,0.992,0.965,0.984,1.0,0.974,0.986,0.967,0.948,0.961,0.966,0.967,0.982,0.981,0.97,0.977,0.971,0.971,0.991,0.972,0.964,0.953,0.982,0.968,0.967,0.971,0.952,0.953,0.911,0.988,0.98,0.958,0.982,0.969,0.954,0.951,0.983,0.982,0.98,1.0,0.994,0.981,0.984,0.969,0.98,0.969,0.969,0.954,0.97,0.985,0.973,0.92,0.937,0.984,0.975,0.962,0.979,0.989,0.976,0.98,0.986,0.983,0.976,0.957,0.944,0.983,0.973,0.9…	0.969,0.972,0.989,0.972,0.99,1.0,0.988,0.993,0.995,0.986,0.989,0.989,0.982,0.954,0.956,0.983,0.996,1.0,0.992,0.996,0.974,0.996,0.981,0.988,0.993,0.984,0.974,0.981,0.979,0.973,0.964,0.966,0.975,0.985,0.994,0.995,1.0,0.993,0.982,0.99,0.987,0.992,0.991,0.986,1.0,1.0,0.953,0.967,0.968,0.978,0.977,0.977	-0.01
13223	ENSG00000129515	SNX6	chr14	-	34608029	34608140	34605486	34605717	34609637	34609742	13223	215,204,67,76,99,103,137,140,187,213,111,103,126,137,162,140,122,136,142,125,142,165,152,122,187,136,132,150,155,140,156,172,131,110,120,137,157,175,183,205,171,177,178,174,120,148,183,166,141,131,155,112,185,176,167,159,81,83,134,122,130,130,88,94,95,99,104,121,231,242,101,97,102,92,89,72,73,81,174,168,93,86,129,134,30,35,136,146,113,140,72,69,100,98,24,25,3,8,6,7,116,113,34,45,118,123,145,167,1…	1,3,1,3,0,3,4,2,3,2,0,1,3,0,2,2,1,2,4,2,6,5,3,4,1,4,7,8,1,2,4,3,0,6,2,7,8,6,7,3,5,6,5,1,3,4,5,2,5,4,2,1,0,2,2,3,1,1,1,1,2,3,5,3,2,1,3,3,5,8,1,4,3,0,1,0,0,3,3,7,1,1,3,2,0,0,4,3,2,2,1,1,1,0,0,0,0,0,0,0,2,4,0,0,3,4,3,2,1,4,3,4,0,0,5,5,7,0,4,1,4,4,1,3,1,2,5,3,1,2,1,0,0,0,5,0,1,7,2,2,2,5,3,2,7,4,1,5,6,6,3,1,4,1,2,2,1,3,1,2,4,2,10,1,3,3,0,2,0,2,2,1,2,3,2,0,2,3,2,2,0,1,3,0,0,0,0,2,1,0,0,0,1,5,2,0,5,8,8,6	71,69,167,146,25,29,44,45,147,149,60,83,130,134,73,68,133,99,218,223,163,146,261,222,80,81,110,115,229,187,89,81,129,160,107,91,7,11,11,12,37,20,87,77,4,4,6,15,20,19,100,108	0,2,4,2,1,0,3,1,3,1,1,0,1,0,0,0,1,3,7,6,5,6,1,5,1,0,1,2,7,8,3,2,7,2,3,4,1,0,0,1,0,0,0,2,0,0,1,1,0,0,1,2	100	50	1.82074e-11	3.30176e-09	0.991,0.971,0.971,0.927,1.0,0.945,0.945,0.972,0.969,0.982,1.0,0.981,0.955,1.0,0.976,0.972,0.984,0.971,0.947,0.969,0.922,0.943,0.962,0.938,0.989,0.944,0.904,0.904,0.987,0.972,0.951,0.966,1.0,0.902,0.968,0.907,0.908,0.936,0.929,0.972,0.945,0.937,0.947,0.989,0.952,0.949,0.948,0.976,0.934,0.942,0.975,0.982,1.0,0.978,0.977,0.964,0.976,0.976,0.985,0.984,0.97,0.956,0.898,0.94,0.96,0.98,0.945,0.953,0.959…	1.0,0.945,0.954,0.973,0.926,1.0,0.88,0.957,0.961,0.987,0.968,1.0,0.985,1.0,1.0,1.0,0.985,0.943,0.94,0.949,0.942,0.924,0.992,0.957,0.976,1.0,0.982,0.966,0.942,0.921,0.937,0.953,0.902,0.976,0.947,0.919,0.778,1.0,1.0,0.857,1.0,1.0,1.0,0.951,1.0,1.0,0.75,0.882,1.0,1.0,0.98,0.964	0.004
13243	ENSG00000100568	VTI1B	chr14	-	67663028	67663190	67662476	67662535	67674374	67674610	13243	6,8,4,8,4,5,7,5,3,1,2,2,3,2,1,1,1,2,6,5,7,6,1,1,2,2,2,0,2,2,4,5,9,4,6,5,4,4,2,1,3,4,1,6,4,1,2,1,0,1,5,2,2,1,0,2,1,3,2,3,3,4,9,5,8,4,3,4,14,6,0,2,6,2,4,0,1,3,2,5,2,2,1,4,0,1,1,1,2,1,4,4,1,1,6,4,0,2,2,1,2,4,1,2,7,2,8,4,6,2,4,5,6,2,10,8,5,1,6,2,1,3,3,3,0,3,2,6,2,6,4,1,2,1,8,9,7,5,5,3,2,2,3,4,2,3,4,2,8,2,2,0,3,5,1,0,4,0,1,2,5,6,3,2,2,0,4,6,6,5,4,4,2,1,8,0,9,2,6,6,4,3,1,1,0,9,1,2,2,1,2,1,5,6,0,8,7,5,2…	51,42,19,16,19,20,34,28,26,28,23,19,25,28,9,27,17,26,36,20,26,43,20,27,42,37,22,21,19,17,56,37,19,33,38,53,31,38,26,23,13,22,18,16,16,11,14,12,24,27,18,16,24,27,11,10,16,17,27,16,29,18,17,29,39,34,34,25,40,56,18,14,10,12,6,3,19,25,26,19,17,30,17,21,7,14,18,20,29,10,7,13,9,27,12,8,7,21,18,16,31,31,15,17,23,16,33,24,16,15,35,42,19,18,24,26,34,43,31,38,30,22,28,24,10,14,30,30,29,24,28,29,17,14,34,19…	0,5,5,4,5,7,13,14,7,9,0,1,3,6,3,3,10,8,5,8,1,0,1,2,3,3,0,1,4,3,2,5,3,2,2,2,4,1,3,4,1,5,0,1,2,2,2,2,5,6,1,5	31,26,37,33,16,11,70,56,27,29,11,18,48,29,38,43,36,38,35,35,30,34,15,18,33,27,32,32,26,19,38,60,24,33,29,18,22,25,12,14,29,31,25,18,6,17,13,24,28,17,36,28	100	50	1.71901e-06	0.000159627	0.056,0.087,0.095,0.2,0.095,0.111,0.093,0.082,0.055,0.018,0.042,0.05,0.057,0.034,0.053,0.018,0.029,0.037,0.077,0.111,0.119,0.065,0.024,0.018,0.023,0.026,0.043,0.0,0.05,0.056,0.034,0.063,0.191,0.057,0.073,0.045,0.061,0.05,0.037,0.021,0.103,0.083,0.027,0.158,0.111,0.043,0.067,0.04,0.0,0.018,0.122,0.059,0.04,0.018,0.0,0.091,0.03,0.081,0.036,0.086,0.049,0.1,0.209,0.079,0.093,0.056,0.042,0.074,0.149,0…	0.0,0.088,0.063,0.057,0.135,0.241,0.085,0.111,0.115,0.134,0.0,0.027,0.03,0.094,0.038,0.034,0.122,0.095,0.067,0.103,0.016,0.0,0.032,0.053,0.043,0.053,0.0,0.015,0.071,0.073,0.026,0.04,0.059,0.029,0.033,0.053,0.083,0.02,0.111,0.125,0.017,0.075,0.0,0.027,0.143,0.056,0.071,0.04,0.082,0.15,0.014,0.082	0.003
13252	ENSG00000140988	RPS2	chr16	-	1964448	1964628	1964275	1964365	1964806	1964826	13252	461,531,564,600,289,279,1114,1028,373,359,1106,1175,1066,1054,349,337,544,640,822,822,1576,1508,503,538,1264,1134,417,395,348,359,1199,1179,745,741,776,722,685,678,357,345,341,308,345,272,265,307,400,436,1338,1250,568,519,539,514,352,346,530,472,925,942,359,374,722,702,714,680,557,528,960,886,296,299,282,289,418,405,502,575,353,336,455,428,619,592,216,195,337,380,355,352,1024,987,392,427,491,538,…	0,0,14,8,0,6,1,0,6,1,0,2,25,24,0,0,1,0,14,13,0,2,0,0,2,3,13,19,2,1,8,15,8,11,0,0,8,12,17,13,6,2,1,0,4,2,11,17,1,0,2,2,0,0,21,21,12,10,2,0,16,9,20,24,25,21,12,12,71,56,14,15,0,3,5,12,1,0,0,0,7,17,9,14,2,8,4,5,9,9,1,1,6,10,3,2,0,0,0,0,0,0,0,0,15,16,0,0,7,8,6,5,8,13,21,31,1,2,0,0,7,4,1,0,18,17,7,6,0,0,121,111,0,0,9,11,0,0,0,0,14,13,0,0,2,8,15,8,0,1,16,9,6,7,0,0,19,9,1,8,9,12,9,17,1,1,16,18,0,0,7,11,…	7.08718e+185	0,0,8,3,12,11,35,24,39,34,5,4,24,27,9,6,6,10,10,8,1,6,3,12,12,16,19,16,0,0,11,11,9,13,3,2,5,8,10,6,0,1,1,0,9,10,0,0,11,4,12,15	100	50	0	0	1.0,1.0,0.953,0.974,1.0,0.959,0.998,1.0,0.969,0.994,1.0,0.997,0.955,0.956,1.0,1.0,0.996,1.0,0.967,0.969,1.0,0.997,1.0,1.0,0.997,0.995,0.941,0.912,0.989,0.994,0.987,0.975,0.979,0.971,1.0,1.0,0.977,0.966,0.913,0.93,0.966,0.987,0.994,1.0,0.971,0.987,0.948,0.928,0.999,1.0,0.993,0.992,1.0,1.0,0.893,0.892,0.957,0.959,0.996,1.0,0.918,0.954,0.948,0.936,0.935,0.942,0.959,0.957,0.871,0.888,0.914,0.909,1.0,…	1.0,1.0,0.972,0.99,0.966,0.966,0.973,0.982,0.944,0.947,0.99,0.991,0.975,0.971,0.979,0.986,0.991,0.986,0.967,0.975,0.998,0.988,0.984,0.934,0.986,0.98,0.966,0.971,1.0,1.0,0.974,0.975,0.983,0.975,0.989,0.993,0.991,0.986,0.988,0.993,1.0,0.998,0.999,1.0,0.988,0.986,1.0,1.0,0.985,0.994,0.981,0.976	-0.012
13254	ENSG00000100138	SNU13	chr22	-	41682355	41682587	41680243	41680364	41688793	41688895	13254	11,15,4,7,9,7,8,18,6,6,9,2,16,14,9,7,9,6,9,9,18,13,1,12,13,3,8,3,2,7,8,12,7,7,10,12,10,7,15,7,3,8,8,4,4,8,7,7,11,14,9,7,5,3,2,3,5,3,10,8,7,5,6,6,12,8,9,7,10,10,4,6,4,1,3,4,6,6,6,7,6,3,6,6,1,6,4,3,5,3,12,10,10,7,14,4,5,7,2,1,2,6,3,3,4,3,0,1,3,5,14,11,10,14,9,12,15,10,13,12,9,7,9,5,6,5,9,5,6,13,14,8,9,9,5,9,10,12,5,5,19,25,8,8,7,9,3,5,6,5,3,3,7,10,3,6,5,7,5,6,9,5,8,9,2,4,5,15,11,11,5,6,5,8,6,10,1,2…	112,107,79,80,59,47,104,122,30,56,106,106,163,147,65,60,120,119,119,113,164,162,61,59,136,97,64,59,52,33,156,151,80,73,127,107,67,69,63,56,42,39,30,21,33,28,61,48,133,127,42,44,64,69,50,37,43,39,75,63,55,59,87,64,161,150,71,89,179,168,32,44,24,29,37,34,80,80,81,65,45,48,69,67,16,20,34,27,26,33,69,54,52,49,65,74,62,44,29,27,128,121,23,18,41,40,24,32,81,61,161,169,59,51,105,115,145,130,141,129,65,6…	4,5,3,8,4,5,23,16,5,11,3,7,19,13,11,11,14,11,11,3,6,12,7,5,11,13,19,10,9,17,15,11,5,12,7,2,7,5,9,5,3,6,8,11,4,5,6,4,13,11,18,9	35,43,67,44,46,45,177,169,106,82,77,57,121,128,127,103,138,123,34,44,84,90,34,25,121,124,65,66,107,95,90,91,87,72,46,51,68,59,59,42,70,79,101,127,47,45,20,32,84,82,65,71	100	50	9.89665e-06	0.000816318	0.047,0.066,0.025,0.042,0.071,0.069,0.037,0.069,0.091,0.051,0.041,0.009,0.047,0.045,0.065,0.055,0.036,0.025,0.036,0.038,0.052,0.039,0.008,0.092,0.046,0.015,0.059,0.025,0.019,0.096,0.025,0.038,0.042,0.046,0.038,0.053,0.069,0.048,0.106,0.059,0.034,0.093,0.118,0.087,0.057,0.125,0.054,0.068,0.04,0.052,0.097,0.074,0.038,0.021,0.02,0.039,0.055,0.037,0.062,0.06,0.06,0.041,0.033,0.045,0.036,0.026,0.06,0.…	0.054,0.055,0.022,0.083,0.042,0.053,0.061,0.045,0.023,0.063,0.019,0.058,0.073,0.048,0.042,0.051,0.048,0.043,0.139,0.033,0.034,0.062,0.093,0.091,0.043,0.05,0.128,0.07,0.04,0.082,0.077,0.057,0.028,0.077,0.071,0.019,0.049,0.041,0.071,0.056,0.021,0.037,0.038,0.042,0.041,0.053,0.13,0.059,0.072,0.063,0.122,0.06	-0.008
13271	ENSG00000186818	LILRB4	chr19	+	54667634	54667793	54666693	54666749	54667872	54668397	13271	256,273,49,54,31,32,10,11,55,59,49,46,58,64,23,24,70,94,38,57,40,40,27,25,28,29,44,51,10,11,106,109,47,38,67,72,39,42,20,20,10,12,9,13,38,46,22,24,21,30,32,21,27,32,27,18,33,51,34,33,11,4,21,20,72,77,30,32,87,81,71,55,8,9,14,8,15,25,44,25,26,9,19,20,19,12,60,75,7,12,46,29,31,16,35,23,100,93,12,8,104,95,49,39,20,17,13,13,35,48,39,46,108,77,28,31,57,41,73,66,36,41,54,44,25,26,100,117,147,132,191,14…	0,3,0,0,1,0,15,12,0,0,0,0,0,0,0,0,0,0,1,0,0,0,1,0,12,15,0,0,4,6,0,0,0,1,1,1,0,0,0,1,0,0,0,0,0,0,2,2,1,0,1,0,0,0,0,0,1,1,0,0,0,0,0,0,1,0,0,0,1,1,0,0,0,0,1,1,3,5,0,0,8,12,1,1,0,0,0,0,0,0,19,15,0,1,0,0,0,0,1,0,2,0,0,0,0,0,0,1,0,0,2,1,0,0,0,0,1,0,0,0,0,0,0,0,1,0,1,0,0,0,0,0,0,0,0,0,0,1,0,1,0,1,19,24,0,0,1,0,0,0,0,1,2,0,0,1,1,1,0,0,1,1,1,0,0,0,0,0,0,0,0,0,9,13,4,6,0,1,27,29,0,0,1,1,0,0,0,0,1,1,0,2,4,1…	34,43,100,87,68,68,284,303,66,83,62,50,53,46,124,114,122,134,63,61,115,83,27,38,42,35,56,80,92,95,134,126,150,144,12,12,68,53,105,93,290,289,55,52,62,52,46,48,70,67,115,85	3,2,1,0,0,0,1,0,1,0,0,1,0,0,2,3,1,0,1,0,1,1,1,0,2,0,2,0,0,1,2,2,2,1,3,0,2,2,1,3,2,4,0,1,0,0,0,0,0,3,1,3	100	50	6.4518e-05	0.00462127	1.0,0.978,1.0,1.0,0.939,1.0,0.25,0.314,1.0,1.0,1.0,1.0,1.0,1.0,1.0,1.0,1.0,1.0,0.95,1.0,1.0,1.0,0.931,1.0,0.538,0.492,1.0,1.0,0.556,0.478,1.0,1.0,1.0,0.95,0.971,0.973,1.0,1.0,1.0,0.909,1.0,1.0,1.0,1.0,1.0,1.0,0.846,0.857,0.913,1.0,0.941,1.0,1.0,1.0,1.0,1.0,0.943,0.962,1.0,1.0,1.0,1.0,1.0,1.0,0.973,1.0,1.0,1.0,0.978,0.976,1.0,1.0,1.0,1.0,0.875,0.8,0.714,0.714,1.0,1.0,0.619,0.273,0.905,0.909,1.0,1.…	0.85,0.915,0.98,1.0,1.0,1.0,0.993,1.0,0.971,1.0,1.0,0.962,1.0,1.0,0.969,0.95,0.984,1.0,0.969,1.0,0.983,0.976,0.931,1.0,0.913,1.0,0.933,1.0,1.0,0.979,0.971,0.969,0.974,0.986,0.667,1.0,0.944,0.93,0.981,0.939,0.986,0.973,1.0,0.963,1.0,1.0,1.0,1.0,1.0,0.918,0.983,0.934	-0.033
13301	ENSG00000149196	HIKESHI	chr11	+	86326512	86326676	86306244	86306482	86337378	86337530	13301	1,2,1,3,2,1,6,7,2,5,2,5,0,0,3,0,2,0,5,2,6,8,9,3,2,4,1,1,2,0,3,0,2,4,3,3,0,0,0,0,3,4,2,1,0,0,1,0,5,9,5,1,2,0,5,1,4,0,6,2,1,2,0,3,3,1,4,3,1,1,2,1,1,0,2,5,1,1,0,10,3,0,0,4,0,0,1,4,5,1,6,3,1,3,0,0,9,1,7,1,5,5,2,2,7,4,1,1,5,3,5,1,5,6,12,4,11,3,6,6,5,10,9,1,1,0,4,5,5,7,2,4,1,1,0,2,2,3,2,3,6,12,1,3,2,2,4,8,2,4,10,8,4,3,1,2,7,9,0,0,7,4,4,3,0,1,6,2,1,6,1,4,4,5,10,2,1,0,8,9,0,1,1,4,0,0,2,1,0,0,3,5,0,0,8,13…	32,37,21,20,34,31,62,59,29,30,60,29,49,69,25,21,31,24,61,51,66,64,39,33,94,58,17,10,12,17,72,52,30,31,36,49,57,51,23,26,16,26,27,22,24,30,26,39,46,64,32,27,34,37,20,21,18,29,56,55,33,31,13,17,46,46,24,27,74,59,40,40,24,15,23,26,29,40,31,25,21,31,53,29,21,19,29,35,25,19,31,34,40,31,48,34,40,40,30,37,54,62,19,17,22,35,29,15,31,18,44,41,80,56,32,31,67,64,57,46,41,51,53,38,11,12,41,28,63,61,64,57,36,…	1,1,2,2,6,8,5,5,1,3,1,2,0,0,8,7,1,2,1,5,1,1,0,1,4,7,1,2,1,3,3,2,4,1,0,5,1,3,9,5,0,5,4,4,5,4,3,0,5,4,2,4	31,36,35,37,65,49,118,107,33,46,48,48,65,57,53,54,64,69,29,39,52,55,18,26,64,60,46,54,36,49,73,47,63,62,36,34,88,64,68,69,54,49,51,56,60,71,52,50,58,59,72,60	100	50	0.000754623	0.0424517	0.015,0.026,0.023,0.07,0.029,0.016,0.046,0.056,0.033,0.077,0.016,0.079,0.0,0.0,0.057,0.0,0.031,0.0,0.039,0.019,0.043,0.059,0.103,0.043,0.011,0.033,0.029,0.048,0.077,0.0,0.02,0.0,0.032,0.061,0.04,0.03,0.0,0.0,0.0,0.0,0.086,0.071,0.036,0.022,0.0,0.0,0.019,0.0,0.052,0.066,0.072,0.018,0.029,0.0,0.111,0.023,0.1,0.0,0.051,0.018,0.015,0.031,0.0,0.081,0.032,0.011,0.077,0.053,0.007,0.008,0.024,0.012,0.02,…	0.016,0.014,0.028,0.026,0.044,0.075,0.021,0.023,0.015,0.032,0.01,0.02,0.0,0.0,0.07,0.061,0.008,0.014,0.017,0.06,0.01,0.009,0.0,0.019,0.03,0.055,0.011,0.018,0.014,0.03,0.02,0.021,0.031,0.008,0.0,0.068,0.006,0.023,0.062,0.035,0.0,0.049,0.038,0.034,0.04,0.027,0.028,0.0,0.041,0.033,0.014,0.032	0.013
13313	ENSG00000110536	PTPMT1	chr11	+	47569699	47569891	47565457	47565986	47571470	47572360	13313	23,27,14,20,6,17,32,28,11,10,20,32,22,29,21,9,32,42,19,24,49,51,12,20,51,47,15,8,10,7,51,42,33,26,31,39,39,32,9,14,11,10,12,18,4,9,8,9,41,30,18,12,32,26,13,10,7,17,25,22,11,18,16,22,35,31,29,15,37,36,19,13,11,9,6,7,13,17,10,6,14,8,30,21,11,8,35,20,14,14,22,26,29,15,24,23,32,23,16,9,35,18,11,9,18,6,9,9,20,14,44,36,31,30,29,24,51,51,39,38,14,23,26,25,10,14,39,21,29,34,63,48,46,31,35,37,29,35,10,5,4…	7,10,6,8,3,3,10,16,1,0,9,5,10,7,6,5,3,6,7,4,12,8,8,9,19,17,5,2,2,1,12,14,6,5,9,6,8,5,3,2,3,3,4,4,3,4,4,1,14,12,5,2,5,9,0,3,2,3,14,5,3,7,5,2,9,12,10,8,13,5,1,3,2,3,0,2,3,2,1,1,0,3,8,6,1,1,8,6,3,5,2,7,4,6,13,10,9,9,2,3,3,16,4,0,3,9,5,1,10,4,9,9,14,14,13,4,3,13,15,10,1,1,4,6,4,1,7,18,22,11,16,7,13,13,7,4,5,8,6,3,15,14,6,12,7,3,4,8,4,3,2,1,10,12,7,7,4,4,8,4,6,10,9,14,8,3,10,8,9,14,2,2,14,13,14,4,7,6,…	12,12,17,20,35,32,72,86,22,24,26,18,36,29,20,25,41,48,12,14,24,16,9,9,32,36,18,18,15,24,34,31,20,19,9,18,30,24,41,23,22,30,26,25,45,52,12,17,35,44,27,46	4,8,8,7,13,20,16,17,13,5,5,7,9,14,14,8,13,16,4,3,5,5,4,2,16,15,8,6,17,8,16,6,2,1,5,4,12,10,13,19,12,15,10,16,10,8,7,10,21,11,13,9	100	50	0.000255161	0.0160206	0.622,0.574,0.538,0.556,0.5,0.739,0.615,0.467,0.846,1.0,0.526,0.762,0.524,0.674,0.636,0.474,0.842,0.778,0.576,0.75,0.671,0.761,0.429,0.526,0.573,0.58,0.6,0.667,0.714,0.778,0.68,0.6,0.733,0.722,0.633,0.765,0.709,0.762,0.6,0.778,0.647,0.625,0.6,0.692,0.4,0.529,0.5,0.818,0.594,0.556,0.643,0.75,0.762,0.591,1.0,0.625,0.636,0.739,0.472,0.688,0.647,0.562,0.615,0.846,0.66,0.564,0.592,0.484,0.587,0.783,0.…	0.6,0.429,0.515,0.588,0.574,0.444,0.692,0.717,0.458,0.706,0.722,0.562,0.667,0.509,0.417,0.61,0.612,0.6,0.6,0.7,0.706,0.615,0.529,0.692,0.5,0.545,0.529,0.6,0.306,0.6,0.515,0.721,0.833,0.905,0.474,0.692,0.556,0.545,0.612,0.377,0.478,0.5,0.565,0.439,0.692,0.765,0.462,0.459,0.455,0.667,0.509,0.719	0.073
13421	ENSG00000137817	PARP6	chr15	-	72249244	72249314	72242619	72242699	72250019	72250092	13421	10,6,0,3,9,11,5,11,4,9,3,11,6,5,9,7,8,8,5,7,11,3,8,15,3,7,7,7,8,5,11,8,10,4,10,3,1,5,5,7,11,8,9,6,6,3,10,12,9,7,11,6,7,9,8,6,4,6,10,9,6,8,5,4,11,6,5,6,11,12,5,4,0,2,1,7,5,4,6,4,8,4,11,11,12,13,6,6,8,8,14,6,13,14,5,6,7,12,0,1,9,8,2,0,5,5,10,10,12,11,6,7,4,0,10,2,5,6,3,2,9,8,6,8,6,5,8,7,6,2,10,6,9,10,3,3,12,12,6,7,7,4,5,2,6,13,5,4,6,10,1,1,1,10,12,13,4,10,9,9,2,7,4,7,6,5,4,4,11,12,8,12,4,12,6,2,11,…	25,26,19,12,19,32,26,13,15,23,14,19,34,23,18,17,16,22,29,33,27,36,20,24,38,43,29,37,12,15,30,30,23,17,20,25,19,20,14,13,24,38,2,8,17,11,17,15,28,26,24,18,34,28,32,22,11,13,18,32,30,23,29,27,28,27,15,16,40,33,21,10,9,11,14,13,19,9,19,27,25,20,25,22,32,38,20,28,21,17,31,16,36,47,18,19,16,21,5,5,26,35,19,25,23,36,17,28,21,30,30,31,20,18,23,13,25,23,32,27,42,31,36,28,14,27,36,41,21,45,23,20,20,21,31,…	4,2,8,7,4,0,14,18,7,7,9,8,6,7,13,6,6,6,8,9,10,14,5,6,8,4,9,13,9,4,7,11,4,5,18,9,7,8,8,4,6,7,17,13,1,1,8,5,9,3,14,6	13,15,18,14,14,12,46,40,22,24,13,16,36,30,11,17,25,17,12,14,23,25,17,12,22,24,17,15,30,23,17,18,23,14,19,16,23,15,23,23,8,19,29,29,12,13,17,15,24,18,21,30	100	50	0.00032011	0.0195413	0.167,0.103,0.0,0.111,0.191,0.147,0.088,0.297,0.118,0.164,0.097,0.224,0.081,0.098,0.2,0.171,0.2,0.154,0.079,0.096,0.169,0.04,0.167,0.238,0.038,0.075,0.108,0.086,0.25,0.143,0.155,0.118,0.179,0.105,0.2,0.057,0.026,0.111,0.152,0.212,0.186,0.095,0.692,0.273,0.15,0.12,0.227,0.286,0.138,0.119,0.186,0.143,0.093,0.138,0.111,0.12,0.154,0.188,0.217,0.123,0.091,0.148,0.079,0.069,0.164,0.1,0.143,0.158,0.121,…	0.133,0.062,0.182,0.2,0.125,0.0,0.132,0.184,0.137,0.127,0.257,0.2,0.077,0.104,0.371,0.15,0.107,0.15,0.25,0.243,0.179,0.219,0.128,0.2,0.154,0.077,0.209,0.302,0.13,0.08,0.171,0.234,0.08,0.152,0.321,0.22,0.132,0.211,0.148,0.08,0.273,0.156,0.227,0.183,0.04,0.037,0.19,0.143,0.158,0.077,0.25,0.091	-0.025
13512	ENSG00000026508	CD44	chr11	+	35211245	35211449	35189834	35189972	35214851	35214861	13512	22,24,18,6,26,23,41,29,147,131,12,8,30,20,40,46,31,35,16,17,32,30,42,37,31,32,30,28,42,44,32,46,13,16,36,52,38,29,25,29,34,37,37,30,55,59,25,35,19,7,33,25,92,69,45,33,33,18,24,29,74,58,23,33,13,22,12,24,67,82,30,16,15,18,25,43,41,31,35,32,69,70,121,126,49,42,49,51,59,59,54,44,43,40,35,39,20,17,6,5,40,40,13,8,39,30,39,25,21,22,29,19,10,15,33,30,24,18,29,20,15,8,26,32,38,52,50,41,14,9,14,6,48,36,16…	5,7,4,7,4,4,9,8,29,18,8,9,2,8,3,5,4,9,3,2,15,14,4,6,13,6,6,6,3,10,15,12,5,4,14,11,11,12,7,5,10,11,2,5,12,9,3,5,15,10,13,10,18,13,7,10,3,6,14,14,16,15,5,6,9,2,6,7,17,11,3,1,7,3,4,3,4,3,5,10,5,15,18,21,1,2,5,11,7,4,6,11,2,2,6,4,2,6,1,3,12,10,3,2,9,4,15,10,8,9,8,11,2,2,19,12,13,9,7,8,5,3,5,5,9,7,11,9,1,8,3,2,8,4,7,6,11,7,6,8,2,3,6,15,13,12,17,16,22,18,11,4,19,15,8,8,5,3,5,5,4,6,13,1,3,4,4,2,5,6,2,4,…	46,30,51,50,60,58,37,33,19,23,15,20,29,30,42,36,26,23,81,70,92,78,92,70,20,32,22,23,56,41,62,62,73,82,79,73,19,11,21,15,16,14,18,25,2,3,19,26,12,12,30,31	6,6,11,20,10,9,13,14,5,12,3,12,9,14,12,5,20,17,31,28,35,24,15,16,7,6,7,6,19,12,12,23,27,18,10,15,7,7,4,5,10,7,9,8,2,1,11,11,10,8,9,11	100	50	0.000139044	0.00929816	0.688,0.632,0.692,0.3,0.765,0.742,0.695,0.644,0.717,0.784,0.429,0.308,0.882,0.556,0.87,0.821,0.795,0.66,0.727,0.81,0.516,0.517,0.84,0.755,0.544,0.727,0.714,0.7,0.875,0.688,0.516,0.657,0.565,0.667,0.562,0.703,0.633,0.547,0.641,0.744,0.63,0.627,0.902,0.75,0.696,0.766,0.806,0.778,0.388,0.259,0.559,0.556,0.719,0.726,0.763,0.623,0.846,0.6,0.462,0.509,0.698,0.659,0.697,0.733,0.419,0.846,0.5,0.632,0.663…	0.793,0.714,0.699,0.556,0.75,0.763,0.587,0.541,0.655,0.489,0.714,0.455,0.617,0.517,0.636,0.783,0.394,0.404,0.566,0.556,0.568,0.619,0.754,0.686,0.588,0.727,0.611,0.657,0.596,0.631,0.721,0.574,0.575,0.695,0.798,0.709,0.576,0.44,0.724,0.6,0.444,0.5,0.5,0.61,0.333,0.6,0.463,0.542,0.375,0.429,0.625,0.585	0.073
13537	ENSG00000085063	CD59	chr11	-	33731423	33731468	33722378	33722463	33736381	33736423	13537	5,4,17,9,35,44,13,13,171,210,18,16,17,10,25,26,20,32,65,59,25,34,21,17,15,13,75,58,41,23,31,28,13,14,15,12,5,7,22,11,55,47,125,114,19,26,12,15,21,21,18,11,34,19,12,15,30,20,26,20,52,63,45,31,17,10,15,25,27,29,16,21,5,4,44,41,47,54,70,53,83,72,35,36,24,35,13,8,26,18,21,23,12,10,36,33,6,1,19,21,13,15,12,12,25,20,165,170,29,40,25,21,5,6,8,10,12,10,10,17,17,19,31,19,14,8,22,15,6,2,23,29,15,18,11,6,27…	105,105,64,66,141,157,80,84,945,926,123,134,114,110,174,175,180,225,232,260,77,79,132,122,111,143,382,328,254,199,116,119,82,70,85,103,66,57,104,122,304,297,369,379,156,132,89,78,166,171,110,93,179,181,136,137,132,102,130,140,287,252,104,114,144,120,102,88,210,220,123,141,29,40,150,170,230,214,255,298,261,244,225,230,185,193,69,96,103,93,162,142,76,83,207,198,46,64,81,92,113,99,70,53,101,99,493,4…	24,41,35,34,78,68,10,5,26,17,22,23,10,17,31,28,33,37,93,95,44,45,67,69,6,8,17,24,12,13,9,13,103,101,114,79,9,7,11,11,31,26,16,7,0,2,22,29,15,12,33,26	119,120,156,127,274,299,38,38,70,82,114,99,80,87,172,163,175,176,358,341,280,272,347,365,56,49,113,108,88,77,83,73,286,301,408,408,32,33,33,54,149,140,54,60,24,25,143,166,48,53,133,125	95	50	8.29313e-07	8.19425e-05	0.024,0.02,0.123,0.067,0.116,0.129,0.079,0.075,0.087,0.107,0.072,0.059,0.073,0.046,0.07,0.073,0.055,0.07,0.129,0.107,0.146,0.185,0.077,0.068,0.066,0.046,0.094,0.085,0.078,0.057,0.123,0.11,0.077,0.095,0.085,0.058,0.038,0.061,0.1,0.045,0.087,0.077,0.151,0.137,0.06,0.094,0.066,0.092,0.062,0.061,0.079,0.059,0.091,0.052,0.044,0.054,0.107,0.094,0.095,0.07,0.087,0.116,0.185,0.125,0.058,0.042,0.072,0.13,…	0.096,0.152,0.106,0.124,0.13,0.107,0.122,0.065,0.164,0.098,0.092,0.109,0.062,0.093,0.087,0.083,0.09,0.1,0.12,0.128,0.076,0.08,0.092,0.09,0.053,0.079,0.073,0.105,0.067,0.082,0.054,0.086,0.159,0.15,0.128,0.092,0.129,0.1,0.149,0.097,0.099,0.089,0.135,0.058,0.0,0.04,0.075,0.084,0.141,0.106,0.116,0.099	-0.015
14017	ENSG00000108774	RAB5C	chr17	-	42137761	42137878	42130336	42130590	42154892	42154964	14017	18,15,8,5,18,19,9,5,9,2,6,6,3,9,2,6,11,8,12,6,4,5,10,13,9,6,10,2,12,14,9,8,4,14,4,10,8,6,4,4,2,2,2,5,4,5,2,2,12,14,4,2,4,8,9,2,3,2,4,1,2,6,7,7,15,3,2,5,7,3,7,9,2,1,9,1,4,1,4,6,3,0,1,3,5,2,2,4,3,9,3,3,2,3,1,2,3,4,1,0,3,3,0,4,2,2,4,6,9,1,18,9,2,1,7,6,6,8,0,2,3,3,3,3,7,3,7,13,5,10,1,3,2,3,2,6,6,6,3,4,0,3,5,9,4,4,7,9,3,2,5,6,2,4,4,4,8,5,2,5,3,5,7,6,0,1,4,2,2,5,5,4,11,2,4,8,6,5,2,5,3,7,8,7,1,1,6,5,3,4…	50,54,26,15,28,26,13,17,12,12,21,24,16,23,16,16,38,31,39,39,13,16,11,15,9,17,11,23,20,21,11,14,42,46,26,29,7,15,21,33,21,16,4,5,11,11,20,20,30,34,15,11,29,24,17,14,11,12,7,7,10,15,20,25,30,22,15,13,29,26,10,4,6,10,9,12,9,10,9,19,19,26,11,13,6,8,6,8,16,2,16,12,4,10,9,9,7,10,1,2,13,14,5,3,3,2,5,13,9,13,27,31,2,1,15,12,16,13,9,13,13,17,7,10,20,23,14,22,7,9,9,12,6,5,15,17,12,12,12,15,23,13,19,13,30,3…	2,1,6,10,0,1,6,4,3,3,6,3,13,10,9,7,8,6,2,3,8,10,6,3,13,10,6,2,9,9,5,7,1,6,12,9,2,0,2,0,2,3,3,3,0,0,6,4,0,2,3,8	19,27,35,32,9,3,25,26,27,30,27,28,31,25,33,25,32,40,24,29,42,32,37,34,31,30,36,29,39,40,33,34,47,39,28,21,5,6,9,11,17,19,26,31,1,1,8,2,2,5,28,41	100	50	2.65209e-07	2.82902e-05	0.153,0.122,0.133,0.143,0.243,0.268,0.257,0.128,0.273,0.077,0.125,0.111,0.086,0.164,0.059,0.158,0.126,0.114,0.133,0.071,0.133,0.135,0.312,0.302,0.333,0.15,0.312,0.042,0.231,0.25,0.29,0.222,0.045,0.132,0.071,0.147,0.364,0.167,0.087,0.057,0.045,0.059,0.2,0.333,0.154,0.185,0.048,0.048,0.167,0.171,0.118,0.083,0.065,0.143,0.209,0.067,0.12,0.077,0.222,0.067,0.091,0.167,0.149,0.123,0.2,0.064,0.062,0.161…	0.05,0.018,0.079,0.135,0.0,0.143,0.107,0.071,0.053,0.048,0.1,0.051,0.173,0.167,0.12,0.123,0.111,0.07,0.04,0.049,0.087,0.135,0.075,0.042,0.173,0.143,0.077,0.033,0.103,0.101,0.07,0.093,0.011,0.071,0.176,0.176,0.167,0.0,0.1,0.0,0.056,0.073,0.055,0.046,0.0,0.0,0.273,0.5,0.0,0.167,0.051,0.089	0.061
14136	ENSG00000054148	PHPT1	chr9	+	136850502	136850560	136850012	136850137	136850754	136851024	14136	6,8,5,4,2,4,1,4,2,3,8,3,3,5,4,1,4,3,7,7,1,3,1,2,6,2,0,1,2,0,7,7,5,6,3,0,2,3,2,4,1,1,1,0,0,2,3,1,4,4,0,1,7,5,3,1,0,0,1,2,0,3,2,3,3,4,2,5,3,3,0,1,1,1,0,1,1,2,1,1,1,0,1,4,1,0,2,0,1,0,1,1,0,2,3,1,11,11,2,2,5,7,2,1,1,2,0,0,1,3,5,5,22,24,4,5,11,14,1,4,7,5,2,0,0,0,10,5,15,11,9,12,24,21,5,8,7,11,6,2,10,15,5,4,3,7,4,1,0,2,1,0,1,2,2,4,1,1,2,5,9,6,3,4,6,2,6,7,5,11,2,1,10,12,8,5,3,4,9,7,22,18,1,1,10,10,1,3,1…	21,25,27,18,12,18,24,20,7,9,34,31,32,38,7,10,19,38,31,31,24,13,12,12,30,31,12,14,7,3,28,29,31,29,36,35,23,17,16,12,11,6,5,5,9,10,11,5,24,32,11,10,10,22,13,14,9,6,16,14,11,8,13,8,34,38,16,13,30,21,16,20,6,8,7,7,18,8,13,9,10,15,18,11,6,5,8,4,5,9,22,29,9,8,25,34,92,97,18,14,34,29,15,5,7,5,3,4,9,8,30,33,131,142,17,18,54,35,18,23,20,15,11,12,7,8,13,22,78,76,82,82,60,83,21,22,17,29,9,10,56,54,20,25,22,…	7,7,3,2,20,16,21,26,2,7,3,7,4,8,2,2,8,5,1,1,5,1,1,1,17,15,3,6,4,4,6,5,5,3,6,5,8,4,8,9,9,10,9,7,37,32,2,2,11,11,12,5	28,24,16,12,54,52,109,73,21,17,27,32,32,33,37,27,33,51,9,5,33,30,4,9,58,36,29,25,23,17,45,30,34,20,8,12,45,51,76,81,58,68,35,29,123,109,17,19,41,47,29,24	100	50	1.68237e-05	0.0013064	0.125,0.138,0.085,0.1,0.077,0.1,0.02,0.091,0.125,0.143,0.105,0.046,0.045,0.062,0.222,0.048,0.095,0.038,0.101,0.101,0.02,0.103,0.04,0.077,0.091,0.031,0.0,0.034,0.125,0.0,0.111,0.108,0.075,0.094,0.04,0.0,0.042,0.081,0.059,0.143,0.043,0.077,0.091,0.0,0.0,0.091,0.12,0.091,0.077,0.059,0.0,0.048,0.259,0.102,0.103,0.034,0.0,0.0,0.03,0.067,0.0,0.158,0.071,0.158,0.042,0.05,0.059,0.161,0.048,0.067,0.0,0.02…	0.111,0.127,0.086,0.077,0.156,0.133,0.088,0.151,0.045,0.171,0.053,0.099,0.059,0.108,0.026,0.036,0.108,0.047,0.053,0.091,0.07,0.016,0.111,0.053,0.128,0.172,0.049,0.107,0.08,0.105,0.062,0.077,0.068,0.07,0.273,0.172,0.082,0.038,0.05,0.053,0.072,0.068,0.114,0.108,0.131,0.128,0.056,0.05,0.118,0.105,0.171,0.094	-0.018
14228	ENSG00000107290	SETX	chr9	-	132269402	132269489	132261355	132264985	132269614	132269702	14228	56,45,27,55,82,64,37,47,55,40,33,39,28,50,18,13,40,36,35,28,64,64,34,29,71,89,61,65,43,50,65,62,21,24,59,66,48,66,54,58,52,50,25,37,7,14,37,32,29,28,44,50,74,68,51,57,25,32,34,22,44,52,32,57,49,63,63,47,90,106,24,23,14,13,21,17,20,20,16,40,25,21,37,33,7,23,32,37,71,75,22,28,74,66,10,13,13,12,5,5,57,53,18,18,60,55,26,25,82,86,57,42,13,13,39,34,62,62,67,51,38,46,46,32,33,45,43,46,37,27,19,10,1,6,29…	64,49,24,22,61,52,43,39,45,47,42,36,44,38,28,24,46,40,30,35,23,44,52,40,47,29,68,51,31,31,56,65,41,48,59,46,70,52,52,47,38,44,18,27,40,25,30,27,43,51,56,48,42,41,55,31,19,8,34,25,28,34,19,23,34,36,35,28,94,66,32,21,13,27,18,18,29,21,37,34,20,26,28,36,18,9,33,46,39,40,20,21,40,51,18,14,15,12,4,7,43,42,21,26,51,45,38,52,47,48,56,60,12,15,28,53,37,35,35,41,29,36,45,46,33,39,52,39,45,33,10,26,13,10,3…	16,10,26,47,16,13,21,14,41,25,8,7,45,25,9,7,29,24,12,14,14,10,15,12,19,25,15,10,24,16,14,14,10,2,14,18,15,22,12,16,19,15,53,35,5,5,5,16,11,11,27,18	18,22,58,47,25,31,23,20,49,60,30,30,36,61,25,30,56,47,23,29,33,26,23,29,33,40,28,26,40,38,28,27,17,20,31,42,28,28,13,13,26,25,42,59,7,7,3,6,13,11,30,38	100	50	0	0	0.304,0.315,0.36,0.556,0.402,0.381,0.301,0.376,0.379,0.299,0.282,0.351,0.241,0.397,0.243,0.213,0.303,0.31,0.368,0.286,0.582,0.421,0.246,0.266,0.43,0.605,0.31,0.389,0.41,0.446,0.367,0.323,0.204,0.2,0.333,0.418,0.255,0.388,0.342,0.382,0.406,0.362,0.41,0.407,0.08,0.219,0.381,0.372,0.252,0.215,0.282,0.342,0.468,0.453,0.317,0.479,0.397,0.667,0.333,0.306,0.44,0.433,0.457,0.553,0.419,0.467,0.474,0.456,0…	0.308,0.185,0.183,0.333,0.242,0.173,0.313,0.259,0.295,0.172,0.118,0.104,0.385,0.17,0.153,0.104,0.206,0.203,0.207,0.194,0.175,0.161,0.246,0.171,0.224,0.238,0.211,0.161,0.231,0.174,0.2,0.206,0.227,0.048,0.184,0.176,0.211,0.282,0.316,0.381,0.268,0.231,0.387,0.229,0.263,0.263,0.455,0.571,0.297,0.333,0.31,0.191	0.096
14368	ENSG00000171159	C9orf16	chr9	+	128162003	128162115	128160459	128160486	128163442	128163737	14368	4,6,1,3,2,2,4,1,2,3,2,5,4,7,1,1,3,3,7,4,1,4,2,1,0,2,4,2,2,1,4,4,3,4,0,2,2,1,0,0,0,1,3,1,2,0,1,2,5,2,1,1,0,5,2,0,2,5,3,1,0,5,4,2,6,2,1,1,7,2,1,1,0,2,2,2,0,4,1,0,3,1,1,0,5,3,0,2,0,0,2,1,0,0,4,6,7,2,1,3,2,5,0,0,1,0,1,1,3,1,1,7,13,10,4,4,2,2,0,1,4,6,4,4,0,1,2,8,11,6,10,5,8,6,2,3,0,6,2,1,7,9,1,1,1,4,3,0,0,1,2,1,1,0,2,2,9,3,1,1,2,0,3,4,2,3,6,4,1,1,1,3,5,10,4,2,3,5,4,3,11,6,1,5,17,8,7,8,16,13,6,4,4,0,4,…	31,40,20,29,35,25,32,24,7,3,23,33,30,34,10,6,33,15,86,71,10,13,13,21,15,23,12,12,27,17,27,23,12,22,20,16,6,8,16,12,11,13,7,11,11,11,8,13,27,26,11,8,9,8,17,8,35,34,17,6,10,12,21,49,56,53,18,5,27,25,21,22,7,12,10,12,19,20,12,8,34,36,8,9,38,30,10,7,10,5,14,13,11,8,40,45,110,91,19,22,20,35,2,7,1,5,8,2,12,16,43,50,111,107,12,11,47,34,18,16,30,35,15,11,20,16,22,27,54,68,66,53,94,78,16,18,14,13,16,17,65…	5,3,1,2,5,7,12,11,5,2,0,1,1,3,4,1,3,0,1,1,0,5,1,4,5,6,5,5,2,4,3,4,4,3,0,2,4,2,5,4,5,9,1,6,5,8,9,10,2,7,4,3	59,40,21,13,108,105,131,125,51,42,39,41,49,42,39,50,69,44,11,26,30,30,13,11,70,56,78,76,32,29,48,43,59,39,15,18,39,29,100,119,94,102,33,51,114,116,99,98,62,64,36,28	100	50	1.35166e-09	1.96551e-07	0.061,0.07,0.024,0.049,0.028,0.038,0.059,0.02,0.125,0.333,0.042,0.07,0.062,0.093,0.048,0.077,0.043,0.091,0.039,0.027,0.048,0.133,0.071,0.023,0.0,0.042,0.143,0.077,0.036,0.029,0.069,0.08,0.111,0.083,0.0,0.059,0.143,0.059,0.0,0.0,0.0,0.037,0.176,0.043,0.083,0.0,0.059,0.071,0.085,0.037,0.043,0.059,0.0,0.238,0.056,0.0,0.028,0.068,0.081,0.077,0.0,0.172,0.087,0.02,0.051,0.019,0.027,0.091,0.115,0.038,0.…	0.041,0.036,0.023,0.071,0.023,0.032,0.044,0.042,0.047,0.023,0.0,0.012,0.01,0.034,0.049,0.01,0.021,0.0,0.043,0.019,0.0,0.077,0.037,0.154,0.034,0.051,0.031,0.032,0.03,0.065,0.03,0.044,0.033,0.037,0.0,0.053,0.049,0.033,0.024,0.017,0.026,0.042,0.015,0.056,0.021,0.033,0.043,0.049,0.016,0.052,0.053,0.051	0.023
14701	ENSG00000178307	TMEM11	chr17	-	21210935	21211227	21197953	21198840	21214090	21214161	14701	32,41,18,17,44,32,20,17,18,16,20,13,26,27,19,22,42,49,31,32,16,9,31,41,19,18,47,62,59,47,37,31,12,20,42,15,16,17,35,23,38,36,16,13,21,21,22,22,27,19,24,22,38,31,21,28,19,25,11,16,26,24,8,10,31,41,14,16,53,46,20,25,9,7,15,18,17,23,37,32,47,45,11,20,33,39,23,28,22,25,11,10,18,34,29,23,20,17,6,2,18,22,14,10,7,10,18,20,12,21,31,15,13,16,14,13,12,13,22,18,21,33,32,24,20,45,36,27,19,15,42,37,22,11,13,2…	23,29,13,17,21,23,11,7,7,4,17,12,12,16,14,13,12,13,20,26,5,12,14,8,5,11,15,15,7,18,12,18,11,12,29,20,10,16,10,11,6,17,6,13,14,11,11,11,8,12,5,7,10,14,8,12,7,11,8,9,11,7,16,13,10,16,9,7,19,15,14,7,8,10,7,11,14,8,16,10,15,20,10,7,10,4,11,13,2,8,7,5,8,5,14,10,24,16,7,14,20,22,13,7,5,6,10,13,9,2,11,10,4,9,12,4,9,16,19,10,19,11,10,10,11,7,15,11,17,17,19,11,10,8,12,11,17,8,18,17,17,12,9,9,13,17,7,6,9,1…	24,19,18,15,6,5,21,25,16,18,13,20,16,11,11,5,21,17,19,18,17,18,18,24,8,12,14,18,14,14,22,21,17,21,19,23,9,5,14,6,8,9,15,17,2,1,6,9,3,7,18,22	15,17,17,15,7,1,37,26,19,14,10,11,11,12,9,10,14,17,31,12,15,16,8,9,30,22,17,16,13,19,26,22,27,9,13,13,13,9,10,6,24,15,9,8,4,7,19,13,12,9,9,13	100	50	2.44249e-14	5.92891e-12	0.41,0.414,0.409,0.333,0.512,0.41,0.476,0.548,0.562,0.667,0.37,0.351,0.52,0.458,0.404,0.458,0.636,0.653,0.437,0.381,0.615,0.273,0.525,0.719,0.655,0.45,0.61,0.674,0.808,0.566,0.607,0.463,0.353,0.455,0.42,0.273,0.444,0.347,0.636,0.511,0.76,0.514,0.571,0.333,0.429,0.488,0.5,0.5,0.628,0.442,0.706,0.611,0.655,0.525,0.568,0.538,0.576,0.532,0.407,0.471,0.542,0.632,0.2,0.278,0.608,0.562,0.438,0.533,0.582…	0.444,0.358,0.346,0.333,0.3,0.714,0.221,0.325,0.296,0.391,0.394,0.476,0.421,0.314,0.379,0.2,0.429,0.333,0.235,0.429,0.362,0.36,0.529,0.571,0.118,0.214,0.292,0.36,0.35,0.269,0.297,0.323,0.239,0.538,0.422,0.469,0.257,0.217,0.412,0.333,0.143,0.231,0.455,0.515,0.2,0.067,0.136,0.257,0.111,0.28,0.5,0.458	0.145
14706	ENSG00000272888	LINC01578	chr15	+	92883584	92883778	92882873	92883186	92885514	92885584	14706	26,31,39,39,69,60,58,57,58,67,76,56,55,48,48,50,28,29,59,72,89,72,54,56,83,92,72,69,53,30,53,66,56,35,59,56,54,60,66,74,75,106,43,42,67,53,62,58,52,68,77,68,80,77,101,80,62,46,61,46,43,49,93,91,66,55,74,59,138,155,45,48,37,28,49,54,50,79,60,69,68,73,85,89,49,48,40,65,75,80,50,57,79,63,41,39,32,38,15,19,47,58,19,36,46,55,83,89,54,64,74,81,30,31,71,55,74,57,70,76,57,53,69,60,55,39,102,71,40,36,36,4…	22,28,26,22,50,57,33,39,45,39,30,43,24,38,31,30,27,20,44,39,70,54,29,29,59,48,73,65,27,17,50,30,29,35,49,45,53,42,55,42,88,72,41,28,33,39,47,41,34,30,40,53,55,55,58,63,36,35,55,49,39,36,126,116,49,44,37,34,71,97,31,28,28,26,28,38,34,36,54,46,38,47,55,40,29,39,28,42,47,52,36,15,41,47,16,14,23,29,10,17,42,45,22,22,50,45,52,68,31,38,58,55,20,18,67,46,46,42,64,50,34,45,49,59,31,29,62,68,31,47,34,44,1…	48,35,65,82,26,23,41,26,66,81,35,38,47,60,58,73,61,55,47,35,45,48,62,60,53,57,76,82,64,54,54,59,77,60,44,45,19,24,30,21,50,27,53,48,10,5,23,20,38,27,59,62	50,38,47,44,34,30,40,48,47,71,26,36,50,39,40,46,50,55,43,41,48,37,55,44,33,25,54,48,63,50,50,37,37,36,34,31,30,23,26,32,37,33,64,59,18,6,28,28,22,19,57,51	100	50	0.000414752	0.0246358	0.371,0.356,0.429,0.47,0.408,0.345,0.468,0.422,0.392,0.462,0.559,0.394,0.534,0.387,0.436,0.455,0.341,0.42,0.401,0.48,0.389,0.4,0.482,0.491,0.413,0.489,0.33,0.347,0.495,0.469,0.346,0.524,0.491,0.333,0.376,0.384,0.338,0.417,0.375,0.468,0.299,0.424,0.344,0.429,0.504,0.405,0.397,0.414,0.433,0.531,0.49,0.391,0.421,0.412,0.465,0.388,0.463,0.397,0.357,0.319,0.355,0.405,0.27,0.282,0.402,0.385,0.5,0.465,0…	0.324,0.315,0.409,0.482,0.277,0.277,0.339,0.213,0.412,0.363,0.402,0.345,0.32,0.435,0.42,0.442,0.379,0.333,0.353,0.299,0.319,0.393,0.36,0.405,0.445,0.533,0.413,0.461,0.337,0.351,0.351,0.444,0.51,0.455,0.393,0.421,0.241,0.343,0.366,0.247,0.403,0.29,0.293,0.289,0.217,0.294,0.291,0.263,0.463,0.415,0.341,0.378	0.048
14845	ENSG00000157303	SUSD3	chr9	+	93079470	93079602	93077845	93077993	93084536	93084667	14845	36,53,29,34,19,16,12,19,3,1,42,20,46,39,24,19,18,28,135,151,25,19,26,17,15,7,4,6,21,14,19,19,31,37,20,22,14,4,16,12,4,2,8,7,9,2,6,8,81,95,7,4,20,22,3,1,6,5,9,9,23,22,12,15,42,41,8,9,44,35,13,20,4,2,5,1,38,27,11,5,20,27,7,18,47,50,9,8,5,2,9,4,6,5,52,51,42,37,59,72,19,19,2,7,8,10,7,14,5,19,77,74,41,38,12,8,43,58,10,12,37,53,15,13,7,7,28,27,51,34,60,55,78,93,19,13,7,11,33,34,51,45,28,18,72,53,10,6,3…	8,2,1,3,5,3,1,2,1,3,1,4,1,1,2,1,0,1,8,3,3,4,3,1,0,0,0,0,0,1,1,1,0,1,0,0,0,0,0,0,0,0,1,1,0,0,0,0,6,2,0,0,2,1,0,0,0,1,0,2,0,3,0,0,2,3,1,0,0,1,2,0,0,0,0,1,1,1,0,0,0,0,0,2,1,0,0,1,0,0,0,0,0,0,1,1,1,1,2,1,2,3,0,0,0,1,0,0,3,1,2,4,3,3,0,0,2,3,0,0,4,5,0,1,1,1,6,2,0,0,2,3,8,7,5,1,0,1,2,3,0,2,1,1,4,3,2,0,2,0,3,1,0,0,1,0,4,0,0,1,1,1,2,2,3,1,3,0,3,1,1,0,7,1,2,3,3,1,0,0,8,11,2,1,2,3,0,0,3,5,0,0,1,1,0,3,3,3,5,4	7,10,13,15,11,14,72,66,29,27,20,21,68,70,8,19,34,22,15,10,11,13,6,6,28,33,52,51,12,12,25,23,9,6,22,7,15,13,24,25,66,43,29,28,20,32,50,38,53,47,8,18	0,0,1,0,0,1,6,4,0,0,3,0,2,9,2,2,1,0,0,0,2,2,0,0,1,2,2,2,3,3,3,4,0,2,0,0,5,2,4,0,1,0,5,4,0,2,1,3,2,1,1,1	100	50	5.49822e-05	0.00400707	0.692,0.93,0.935,0.85,0.655,0.727,0.857,0.826,0.6,0.143,0.955,0.714,0.958,0.951,0.857,0.905,1.0,0.933,0.894,0.962,0.806,0.704,0.812,0.895,1.0,1.0,1.0,1.0,1.0,0.875,0.905,0.905,1.0,0.949,1.0,1.0,1.0,1.0,1.0,1.0,1.0,1.0,0.8,0.778,1.0,1.0,1.0,1.0,0.871,0.96,1.0,1.0,0.833,0.917,1.0,1.0,1.0,0.714,1.0,0.692,1.0,0.786,1.0,1.0,0.913,0.872,0.8,1.0,1.0,0.946,0.765,1.0,1.0,1.0,1.0,0.333,0.95,0.931,1.0,1.0,1…	1.0,1.0,0.867,1.0,1.0,0.875,0.857,0.892,1.0,1.0,0.769,1.0,0.944,0.795,0.667,0.826,0.944,1.0,1.0,1.0,0.733,0.765,1.0,1.0,0.933,0.892,0.929,0.927,0.667,0.667,0.806,0.742,1.0,0.6,1.0,1.0,0.6,0.765,0.75,1.0,0.971,1.0,0.744,0.778,1.0,0.889,0.962,0.864,0.93,0.959,0.8,0.9	0.014
15020	ENSG00000091164	TXNL1	chr18	-	56626161	56626266	56624287	56624461	56626360	56626457	15020	0,1,3,0,0,2,3,4,7,7,2,0,1,2,0,0,1,1,2,0,1,6,3,3,9,4,7,9,3,1,8,5,3,5,5,1,0,2,2,1,2,1,0,1,1,0,0,2,1,0,2,3,4,7,2,6,1,1,4,3,3,0,64,95,4,7,2,0,0,0,0,0,0,2,0,2,0,3,5,2,0,0,2,3,4,0,1,2,2,9,6,2,3,3,7,6,2,3,0,0,2,2,2,1,3,1,2,2,12,8,6,6,0,0,2,2,5,6,1,0,1,2,2,1,2,0,5,0,0,2,4,2,0,0,1,1,1,1,0,3,0,1,4,3,0,0,2,0,4,2,0,3,3,5,1,1,0,0,1,0,1,1,0,1,0,0,2,4,0,1,3,4,0,2,1,0,0,0,0,3,0,0,2,0,3,9,0,0,0,1,0,0,2,1,1,2,1,3,…	47,42,27,39,20,23,54,43,48,22,53,46,45,53,31,30,35,42,37,28,37,45,32,37,54,54,44,30,35,24,49,39,44,33,48,43,65,42,41,24,38,20,29,29,39,27,30,25,48,39,21,25,37,33,24,34,27,23,33,45,23,20,17,36,51,47,33,30,71,72,27,19,21,22,31,24,18,22,35,25,30,29,30,40,20,28,33,35,29,18,26,33,29,41,20,23,13,15,13,14,55,34,14,16,28,39,24,30,28,27,49,46,18,8,51,50,29,37,56,47,23,41,35,37,22,26,42,45,20,31,36,33,17,2…	2,0,2,0,0,3,5,2,0,3,0,0,1,2,0,0,6,2,2,0,0,1,1,0,2,2,3,1,1,1,2,1,2,2,0,0,0,0,1,1,0,0,2,3,0,0,0,2,0,1,2,0	17,21,33,33,23,22,53,61,43,35,32,26,42,51,58,55,38,50,51,52,34,49,35,30,48,32,45,49,44,43,52,38,24,37,28,30,10,19,31,27,32,30,47,43,6,9,21,19,13,17,40,26	100	50	0	0	0.0,0.012,0.053,0.0,0.0,0.042,0.027,0.044,0.068,0.137,0.019,0.0,0.011,0.019,0.0,0.0,0.014,0.012,0.026,0.0,0.013,0.062,0.045,0.039,0.077,0.036,0.074,0.13,0.041,0.02,0.075,0.06,0.033,0.07,0.05,0.011,0.0,0.023,0.024,0.02,0.026,0.024,0.0,0.017,0.013,0.0,0.0,0.038,0.01,0.0,0.045,0.057,0.051,0.096,0.04,0.081,0.018,0.021,0.057,0.032,0.061,0.0,0.653,0.569,0.038,0.069,0.029,0.0,0.0,0.0,0.0,0.0,0.0,0.043,0…	0.056,0.0,0.029,0.0,0.0,0.064,0.045,0.016,0.0,0.041,0.0,0.0,0.012,0.019,0.0,0.0,0.073,0.02,0.019,0.0,0.0,0.01,0.014,0.0,0.02,0.03,0.032,0.01,0.011,0.011,0.019,0.013,0.04,0.026,0.0,0.0,0.0,0.0,0.016,0.018,0.0,0.0,0.021,0.034,0.0,0.0,0.0,0.05,0.0,0.029,0.024,0.0	0.023
15047	ENSG00000247774	PCED1B-AS1	chr12	-	47210639	47210761	47206510	47206588	47216164	47216200	15047	100,117,70,61,84,77,124,125,62,50,261,239,402,382,31,27,84,76,51,52,127,137,43,59,190,167,37,34,65,42,206,183,127,133,94,92,67,71,33,32,45,49,27,24,45,69,26,35,148,143,37,43,88,70,40,28,23,34,89,74,39,50,46,57,128,98,89,102,163,138,58,46,34,40,42,41,76,65,49,52,54,48,88,78,49,37,50,50,67,80,147,133,62,76,40,44,244,233,33,17,53,81,21,18,114,90,28,45,90,96,380,367,253,236,175,161,396,391,162,156,25…	5,12,6,2,8,6,17,5,4,4,20,30,39,23,2,1,9,2,4,3,19,11,3,1,27,23,3,6,4,1,15,9,4,1,6,6,13,7,2,1,2,7,2,10,10,7,2,4,19,13,5,2,7,6,2,5,7,2,10,10,1,1,14,11,2,9,5,7,19,8,5,6,3,5,4,5,10,10,6,4,8,5,8,6,4,1,4,2,8,16,12,20,7,9,10,13,16,19,4,2,24,26,5,4,21,20,2,4,9,10,25,24,28,15,16,12,43,21,15,26,8,13,11,3,4,3,4,10,12,13,8,10,6,9,15,9,17,12,5,8,37,27,13,5,5,4,11,4,15,7,2,7,0,3,8,12,7,5,5,5,15,10,17,8,14,24,19…	31,37,87,103,164,153,264,215,196,166,68,73,345,360,95,98,157,175,72,68,91,75,41,34,250,239,67,53,93,79,68,90,21,37,98,79,209,189,292,333,235,203,192,175,322,320,83,78,322,308,54,64	10,4,17,8,21,26,24,28,6,15,14,5,32,37,15,14,10,7,11,11,12,14,2,5,33,21,8,8,7,9,8,14,6,16,11,11,25,32,28,51,21,17,16,15,39,38,18,17,20,26,11,9	100	50	1.26235e-06	0.000120856	0.909,0.83,0.854,0.938,0.84,0.865,0.785,0.926,0.886,0.862,0.867,0.799,0.837,0.893,0.886,0.931,0.824,0.95,0.864,0.897,0.77,0.862,0.878,0.967,0.779,0.784,0.86,0.739,0.89,0.955,0.873,0.91,0.941,0.985,0.887,0.885,0.72,0.835,0.892,0.941,0.918,0.778,0.871,0.545,0.692,0.831,0.867,0.814,0.796,0.846,0.787,0.915,0.863,0.854,0.909,0.737,0.622,0.895,0.817,0.787,0.951,0.962,0.622,0.722,0.97,0.845,0.899,0.879,…	0.608,0.822,0.719,0.866,0.796,0.746,0.846,0.793,0.942,0.847,0.708,0.88,0.844,0.829,0.76,0.778,0.887,0.926,0.766,0.756,0.791,0.728,0.911,0.773,0.791,0.851,0.807,0.768,0.869,0.814,0.81,0.763,0.636,0.536,0.817,0.782,0.807,0.747,0.839,0.766,0.848,0.857,0.857,0.854,0.805,0.808,0.697,0.696,0.89,0.856,0.711,0.78	0.045
15079	ENSG00000135636	DYSF	chr2	+	71549349	71549391	71539156	71539239	71551040	71551156	15079	32,24,11,9,17,14,2,5,35,29,6,5,3,4,13,12,28,24,21,22,6,12,12,13,10,9,57,43,29,20,17,11,12,6,27,21,13,20,19,15,32,45,25,24,19,21,37,35,15,9,5,14,29,32,31,26,17,23,23,26,38,26,24,19,13,7,9,8,15,11,4,9,22,22,7,2,9,14,39,23,59,44,20,32,21,11,25,19,23,25,18,14,8,22,12,4,1,1,3,2,12,13,4,5,17,16,45,75,32,33,3,7,0,0,15,6,8,5,9,10,8,17,19,14,30,35,18,17,3,6,1,1,1,1,12,14,7,8,40,32,3,3,15,7,34,28,47,22,97,…	95,145,63,63,90,77,23,37,156,132,42,34,49,28,97,125,139,166,59,52,25,25,123,120,52,57,183,158,167,178,68,70,66,54,79,76,66,71,99,93,125,123,41,39,120,117,95,109,68,66,104,76,175,150,137,129,25,24,88,86,91,120,31,28,96,70,42,47,127,105,60,44,40,33,62,38,22,13,174,154,112,110,147,155,60,68,113,129,129,106,68,51,123,148,15,24,3,3,3,2,54,54,38,34,80,84,74,63,131,121,32,40,7,1,85,95,21,27,79,72,40,38,…	9,5,31,26,14,25,9,11,39,19,35,35,8,15,13,28,16,28,89,77,44,48,51,56,5,10,16,9,21,22,15,30,30,43,45,40,2,2,1,3,5,17,7,11,0,0,17,11,0,0,18,11	35,27,120,116,36,24,9,17,54,50,79,102,37,49,76,90,52,75,103,128,151,140,195,150,23,30,29,24,117,112,102,75,96,90,132,119,3,4,7,9,24,31,34,23,1,1,14,26,11,11,77,68	92	50	1.63203e-14	4.05743e-12	0.155,0.083,0.087,0.072,0.093,0.09,0.045,0.068,0.109,0.107,0.072,0.074,0.032,0.072,0.068,0.05,0.099,0.073,0.162,0.187,0.115,0.207,0.05,0.056,0.095,0.079,0.145,0.129,0.086,0.058,0.12,0.079,0.09,0.057,0.157,0.131,0.097,0.133,0.094,0.081,0.122,0.166,0.249,0.251,0.079,0.089,0.175,0.149,0.107,0.069,0.025,0.091,0.083,0.104,0.11,0.099,0.27,0.342,0.124,0.141,0.185,0.105,0.296,0.269,0.069,0.052,0.104,0.08…	0.123,0.091,0.123,0.109,0.174,0.361,0.352,0.26,0.282,0.171,0.194,0.157,0.105,0.143,0.085,0.145,0.143,0.169,0.32,0.246,0.137,0.157,0.124,0.169,0.106,0.153,0.231,0.169,0.089,0.096,0.074,0.179,0.145,0.206,0.156,0.154,0.266,0.214,0.072,0.153,0.102,0.23,0.101,0.206,0.0,0.0,0.398,0.187,0.0,0.0,0.113,0.081	-0.048
15168	ENSG00000153113	CAST	chr5	+	96746341	96746425	96742654	96742756	96747344	96747392	15168	246,288,84,91,76,82,186,179,111,123,95,87,179,168,287,311,119,149,263,238,205,174,144,137,214,239,194,148,213,214,207,208,96,121,132,142,166,156,125,125,230,226,149,143,187,202,190,192,188,195,81,92,170,137,114,103,80,76,216,206,137,146,130,129,117,147,104,119,170,173,115,77,80,76,89,116,107,98,139,146,119,119,172,198,71,45,144,134,94,85,106,110,98,86,45,37,25,21,26,21,157,135,73,52,122,127,291,2…	10,3,0,1,1,1,1,1,0,4,0,1,1,1,6,2,5,1,4,2,31,27,2,4,4,6,1,1,4,4,1,2,2,0,3,4,3,3,1,2,1,3,1,4,3,5,2,1,3,3,0,0,1,2,0,0,0,0,3,1,0,2,10,5,1,3,1,1,4,3,3,3,0,0,1,0,2,0,1,1,4,0,0,5,0,1,2,2,3,2,2,1,3,0,0,0,0,0,1,3,26,33,0,0,2,1,3,3,1,2,0,5,0,0,1,3,2,1,0,0,2,2,4,2,3,1,3,5,3,0,0,0,1,0,0,0,0,0,1,1,0,0,1,2,0,2,3,1,3,4,1,1,5,2,0,1,1,0,0,0,0,4,0,2,0,0,0,0,1,0,1,2,2,3,0,0,0,0,0,1,1,3,4,2,0,0,0,0,0,2,0,0,0,0,1,1,2…	69,83,169,177,49,30,142,137,136,132,95,106,133,114,146,150,137,120,190,177,149,168,226,236,96,83,90,94,224,216,148,135,162,150,185,188,17,25,23,30,52,46,93,76,16,8,36,28,25,22,113,124	1,0,0,0,0,0,0,0,2,0,1,3,0,0,2,2,2,0,1,4,1,0,0,2,0,0,2,0,1,1,2,4,3,0,1,2,0,2,0,0,0,0,0,2,0,0,1,0,0,0,4,1	100	50	1.96317e-09	2.82807e-07	0.925,0.98,1.0,0.978,0.974,0.976,0.989,0.989,1.0,0.939,1.0,0.978,0.989,0.988,0.96,0.987,0.922,0.987,0.97,0.983,0.768,0.763,0.973,0.945,0.964,0.952,0.99,0.987,0.964,0.964,0.99,0.981,0.96,1.0,0.957,0.947,0.965,0.963,0.984,0.969,0.991,0.974,0.987,0.947,0.969,0.953,0.979,0.99,0.969,0.97,1.0,1.0,0.988,0.972,1.0,1.0,1.0,1.0,0.973,0.99,1.0,0.973,0.867,0.928,0.983,0.961,0.981,0.983,0.955,0.966,0.95,0.928…	0.972,1.0,1.0,1.0,1.0,1.0,1.0,1.0,0.971,1.0,0.979,0.946,1.0,1.0,0.973,0.974,0.972,1.0,0.99,0.957,0.987,1.0,1.0,0.983,1.0,1.0,0.957,1.0,0.991,0.991,0.974,0.944,0.964,1.0,0.989,0.979,1.0,0.862,1.0,1.0,1.0,1.0,1.0,0.95,1.0,1.0,0.947,1.0,1.0,1.0,0.934,0.984	-0.012
15266	ENSG00000145425	RPS3A	chr4	+	151100484	151100588	151099627	151099714	151102870	151104205	15266	494,511,673,620,307,275,1393,1345,599,575,1363,1403,1371,1429,622,618,669,676,787,819,1712,1677,667,668,1745,1811,456,464,547,479,1581,1554,803,803,971,889,1081,1097,508,506,528,516,603,659,465,441,474,505,1393,1277,567,612,627,606,370,351,658,670,1396,1247,598,491,978,969,871,851,870,826,1138,1105,529,516,354,330,479,493,874,809,544,515,509,442,727,709,418,417,686,628,763,755,1530,1499,698,670,6…	15,11,19,15,5,5,17,10,9,12,29,15,30,20,7,12,8,2,21,19,26,25,11,7,22,23,7,8,3,4,15,21,13,12,10,19,16,20,12,11,9,5,15,17,7,10,7,4,16,29,7,13,8,8,2,7,15,13,11,12,6,7,16,35,12,20,14,8,20,10,6,5,6,7,10,10,6,2,4,7,7,7,6,13,12,9,10,8,7,12,27,28,16,10,8,16,22,12,20,23,19,30,3,2,12,15,20,10,4,5,45,44,28,22,32,24,68,63,15,23,22,16,17,15,10,11,6,6,7,7,6,11,8,5,10,14,20,13,6,13,28,26,19,11,13,16,5,5,24,13,5,…	8.60895e+191	15,13,16,17,23,20,40,43,35,30,29,33,40,57,23,15,31,20,13,18,24,19,8,3,56,47,33,25,12,15,22,17,19,16,19,16,22,30,48,41,24,24,35,40,63,65,22,19,68,71,36,22	100	50	2.03148e-07	2.24468e-05	0.943,0.959,0.947,0.954,0.968,0.965,0.976,0.985,0.971,0.96,0.959,0.979,0.958,0.973,0.978,0.963,0.977,0.994,0.949,0.956,0.971,0.971,0.968,0.979,0.975,0.975,0.97,0.967,0.989,0.984,0.981,0.974,0.969,0.971,0.98,0.959,0.971,0.965,0.955,0.958,0.967,0.981,0.953,0.951,0.971,0.957,0.971,0.984,0.978,0.957,0.976,0.959,0.975,0.974,0.989,0.962,0.956,0.963,0.984,0.981,0.98,0.972,0.968,0.933,0.973,0.955,0.969,0…	0.966,0.972,0.963,0.96,0.945,0.953,0.964,0.961,0.96,0.964,0.954,0.946,0.965,0.951,0.966,0.978,0.96,0.973,0.961,0.943,0.962,0.969,0.969,0.988,0.948,0.957,0.964,0.973,0.978,0.973,0.961,0.97,0.958,0.964,0.943,0.955,0.971,0.96,0.953,0.96,0.964,0.964,0.969,0.965,0.937,0.934,0.95,0.953,0.93,0.93,0.956,0.973	0.006
15446	ENSG00000166913	YWHAB	chr20	+	44902897	44903121	44901610	44901833	44903992	44904116	15446	18,8,6,2,15,13,19,21,26,17,12,9,13,12,12,13,2,10,18,26,19,21,19,13,18,19,25,28,19,12,24,14,1,11,7,15,9,12,18,16,24,20,13,21,9,14,26,28,5,11,9,18,21,13,41,39,13,15,14,18,9,5,69,45,21,13,17,18,28,35,8,8,7,7,14,11,10,9,21,27,10,16,11,10,8,8,17,13,9,13,8,10,16,19,13,7,11,9,2,1,14,12,4,9,11,16,21,16,30,33,12,12,2,1,10,17,13,17,6,11,20,12,12,16,15,17,28,20,7,7,12,3,6,6,11,8,13,8,8,14,13,16,8,6,8,2,23,1…	218,228,117,143,114,111,211,236,254,221,224,213,205,224,228,225,147,194,219,221,209,196,160,142,233,219,148,134,189,156,282,294,190,195,222,225,237,256,178,167,162,150,209,210,241,247,163,184,263,226,164,113,225,226,132,134,102,115,233,213,118,128,163,152,127,148,179,189,343,351,164,163,100,79,108,122,158,147,149,140,118,145,209,224,123,108,224,234,263,271,173,197,228,204,156,120,161,163,61,55,19…	9,15,19,23,1,7,4,4,10,10,18,14,11,18,8,7,11,12,0,4,7,8,16,16,0,6,11,22,14,16,9,5,14,17,16,12,10,5,9,3,12,12,15,8,5,4,7,1,5,6,23,15	169,144,238,234,132,148,256,240,150,175,198,171,175,165,240,265,248,235,265,304,268,233,168,176,158,164,176,193,185,207,279,244,267,244,204,195,161,151,143,147,171,157,205,211,80,78,203,211,131,118,223,198	100	50	1.4444e-13	3.27412e-11	0.04,0.017,0.025,0.007,0.062,0.055,0.043,0.043,0.049,0.037,0.026,0.021,0.031,0.026,0.026,0.028,0.007,0.025,0.039,0.056,0.043,0.051,0.056,0.044,0.037,0.042,0.078,0.095,0.048,0.037,0.041,0.023,0.003,0.027,0.016,0.032,0.019,0.023,0.048,0.046,0.069,0.062,0.03,0.048,0.018,0.028,0.074,0.071,0.009,0.024,0.027,0.074,0.045,0.028,0.134,0.127,0.06,0.061,0.029,0.041,0.037,0.019,0.175,0.129,0.076,0.042,0.045,…	0.026,0.05,0.038,0.047,0.004,0.023,0.008,0.008,0.032,0.028,0.043,0.039,0.03,0.052,0.016,0.013,0.022,0.025,0.0,0.007,0.013,0.017,0.045,0.043,0.0,0.018,0.03,0.054,0.036,0.037,0.016,0.01,0.026,0.034,0.038,0.03,0.03,0.016,0.031,0.01,0.034,0.037,0.035,0.019,0.03,0.025,0.017,0.002,0.019,0.025,0.049,0.036	0.012
15550	ENSG00000138668	HNRNPD	chr4	-	82354894	82355001	82353833	82354154	82355303	82355401	15550	2,1,3,4,11,14,7,4,5,5,11,5,7,6,12,7,4,6,2,4,7,5,4,8,8,8,2,2,5,4,5,4,6,8,6,4,4,4,21,8,5,10,5,13,14,11,13,10,4,6,14,16,15,12,11,17,3,2,7,8,2,2,11,12,14,15,4,10,11,13,7,7,6,3,5,6,3,10,4,1,8,6,12,11,3,4,5,4,2,4,7,7,8,7,17,12,9,7,1,6,16,9,2,2,5,8,3,2,15,7,8,4,10,9,2,6,8,3,8,6,10,8,7,12,7,12,14,3,7,3,7,8,15,12,8,4,3,11,8,8,1,4,7,7,7,15,3,9,0,1,7,6,7,7,15,16,6,10,1,8,6,3,13,9,17,17,10,6,4,9,3,3,8,2,8,13…	101,125,77,79,69,57,111,93,44,50,144,107,111,91,66,51,76,76,108,106,134,144,80,74,139,119,67,60,49,35,134,137,98,70,106,107,127,125,58,59,105,96,62,59,56,68,72,74,144,135,66,68,107,79,73,85,91,94,121,123,83,79,112,122,119,115,86,81,173,187,75,57,46,44,48,38,111,96,89,68,90,91,149,114,50,49,88,90,52,65,116,85,87,77,77,100,104,102,28,34,155,148,49,34,82,116,115,114,59,50,149,163,134,125,111,95,178,…	6,14,5,7,4,1,15,5,4,3,10,8,6,1,10,6,4,6,3,2,15,13,6,4,11,4,13,18,9,9,6,8,23,12,4,6,8,3,6,4,7,9,7,9,4,4,5,9,9,6,7,9	91,79,90,100,144,146,188,204,129,146,105,90,165,165,96,105,141,152,107,103,70,90,80,72,200,174,146,173,114,107,98,125,126,116,77,100,167,164,123,103,124,145,163,161,130,116,107,111,190,210,132,109	100	50	0.000190058	0.012309	0.01,0.004,0.019,0.025,0.074,0.109,0.031,0.021,0.054,0.048,0.037,0.023,0.031,0.032,0.083,0.064,0.026,0.038,0.009,0.019,0.025,0.017,0.024,0.051,0.028,0.033,0.015,0.016,0.049,0.054,0.018,0.014,0.03,0.054,0.028,0.018,0.016,0.016,0.153,0.063,0.023,0.05,0.039,0.099,0.111,0.075,0.083,0.063,0.014,0.022,0.096,0.105,0.066,0.071,0.07,0.091,0.016,0.011,0.028,0.031,0.012,0.012,0.047,0.047,0.056,0.061,0.023,0…	0.032,0.081,0.027,0.034,0.014,0.003,0.038,0.012,0.015,0.01,0.045,0.043,0.018,0.003,0.05,0.028,0.014,0.019,0.014,0.01,0.097,0.067,0.036,0.027,0.027,0.011,0.043,0.049,0.038,0.04,0.03,0.031,0.084,0.049,0.025,0.029,0.023,0.009,0.024,0.019,0.027,0.03,0.021,0.027,0.015,0.017,0.023,0.039,0.023,0.014,0.026,0.04	0.01
15778	ENSG00000145088	EAF2	chr3	+	121854686	121854823	121844452	121844547	121857010	121857156	15778	27,41,42,41,12,18,49,51,61,49,78,60,93,77,72,73,158,142,109,79,135,115,55,54,153,153,60,44,34,27,103,123,45,45,71,68,69,64,51,62,38,42,64,66,38,36,38,39,64,70,34,57,82,73,47,49,33,24,106,86,88,105,28,41,86,76,53,32,187,212,38,50,17,14,56,54,79,71,63,75,33,25,80,70,46,44,46,63,50,68,69,52,42,69,59,59,35,37,91,85,54,38,9,9,55,55,45,70,49,46,92,102,46,44,32,28,48,58,84,92,43,50,39,32,21,14,44,40,34,…	2,2,1,2,3,0,6,3,3,2,1,1,5,1,3,6,4,5,5,3,4,3,3,1,7,5,2,1,1,1,4,6,3,1,6,4,2,1,3,2,4,6,4,4,2,3,3,0,6,2,2,2,1,3,3,3,1,1,0,3,0,2,2,3,1,0,3,2,8,7,0,0,1,0,0,0,0,1,2,3,1,2,4,4,3,6,2,2,3,0,2,3,1,2,0,1,0,3,3,2,5,1,0,0,3,3,1,1,4,2,2,6,0,0,2,2,4,1,8,4,6,2,2,2,0,1,0,1,0,2,3,6,1,0,1,2,3,6,0,2,2,7,6,6,0,5,2,3,0,2,4,2,2,3,1,5,0,1,5,0,4,0,4,2,2,1,2,3,2,4,3,3,2,2,4,1,0,0,3,7,4,3,3,6,3,6,0,0,3,3,0,1,4,3,5,0,0,4,4,2	34,27,31,32,34,29,68,55,35,39,28,20,54,46,59,41,46,39,53,56,34,35,36,26,20,20,51,66,33,36,54,47,43,56,22,20,29,24,52,50,31,38,56,62,11,16,68,49,17,18,62,53	1,1,5,2,1,4,5,8,1,1,4,2,4,4,1,5,4,4,1,3,2,1,4,5,0,0,4,3,3,4,3,4,3,2,6,4,0,1,2,7,1,5,6,3,0,1,0,1,5,2,1,8	100	50	5.03192e-07	5.1708e-05	0.871,0.911,0.955,0.911,0.667,1.0,0.803,0.895,0.91,0.925,0.975,0.968,0.903,0.975,0.923,0.859,0.952,0.934,0.916,0.929,0.944,0.95,0.902,0.964,0.916,0.939,0.938,0.957,0.944,0.931,0.928,0.911,0.882,0.957,0.855,0.895,0.945,0.97,0.895,0.939,0.826,0.778,0.889,0.892,0.905,0.857,0.864,1.0,0.842,0.946,0.895,0.934,0.976,0.924,0.887,0.891,0.943,0.923,1.0,0.935,1.0,0.963,0.875,0.872,0.977,1.0,0.898,0.889,0.92…	0.944,0.931,0.756,0.889,0.944,0.784,0.872,0.775,0.946,0.951,0.778,0.833,0.871,0.852,0.967,0.804,0.852,0.83,0.964,0.903,0.895,0.946,0.818,0.722,1.0,1.0,0.864,0.917,0.846,0.818,0.9,0.855,0.878,0.933,0.647,0.714,1.0,0.923,0.929,0.781,0.939,0.792,0.824,0.912,1.0,0.889,1.0,0.961,0.63,0.818,0.969,0.768	0.039
16001	ENSG00000140678	ITGAX	chr16	+	31373248	31373390	31372596	31372670	31376798	31376915	16001	250,297,214,217,584,559,287,312,355,320,348,396,221,202,320,317,432,459,509,493,139,152,231,263,251,247,503,473,400,391,332,290,412,365,345,324,240,206,487,475,311,304,152,141,249,250,583,557,334,323,390,332,517,527,435,515,284,241,276,266,244,236,192,208,397,397,227,266,646,677,195,132,223,226,163,173,155,180,355,284,712,695,406,377,283,281,243,220,280,275,231,215,284,271,222,263,180,199,24,26,3…	24,25,9,13,59,67,52,46,32,42,38,40,23,21,40,38,53,75,40,37,15,13,25,24,26,29,39,29,51,47,29,37,31,39,43,34,27,20,60,53,23,17,7,7,42,40,58,50,50,45,61,49,57,47,34,40,10,17,25,19,9,20,15,9,42,43,37,48,53,62,23,23,10,22,21,22,6,7,31,19,53,53,37,27,14,22,23,24,28,43,20,24,41,44,40,30,39,35,5,5,44,49,19,16,16,10,10,4,63,42,37,44,14,15,38,36,7,14,19,35,27,14,22,14,104,113,44,42,25,30,30,22,32,22,33,22,…	340,324,506,524,166,184,169,194,413,419,486,460,303,261,331,315,471,462,478,473,902,827,796,786,449,427,343,331,451,448,448,497,617,637,471,488,109,107,126,117,362,382,458,498,24,21,192,189,141,146,323,339	30,28,54,62,10,20,12,15,39,37,41,52,24,30,43,34,46,59,49,35,81,72,57,65,35,41,26,28,47,44,35,47,29,26,50,47,9,12,15,11,34,29,47,46,3,5,11,10,11,9,31,21	100	50	8.32683e-06	0.000699453	0.839,0.856,0.922,0.893,0.832,0.807,0.734,0.772,0.847,0.792,0.821,0.832,0.828,0.828,0.8,0.807,0.803,0.754,0.864,0.869,0.822,0.854,0.822,0.846,0.828,0.81,0.866,0.891,0.797,0.806,0.851,0.797,0.869,0.824,0.8,0.827,0.816,0.837,0.802,0.818,0.871,0.899,0.916,0.91,0.748,0.758,0.834,0.848,0.77,0.782,0.762,0.772,0.819,0.849,0.865,0.866,0.934,0.876,0.847,0.875,0.931,0.855,0.865,0.92,0.825,0.822,0.754,0.735…	0.85,0.853,0.824,0.809,0.892,0.821,0.876,0.866,0.841,0.85,0.856,0.816,0.863,0.813,0.794,0.822,0.837,0.797,0.83,0.871,0.848,0.852,0.875,0.858,0.865,0.839,0.868,0.855,0.828,0.836,0.865,0.841,0.914,0.925,0.825,0.838,0.858,0.817,0.808,0.842,0.842,0.868,0.83,0.844,0.8,0.677,0.897,0.904,0.865,0.89,0.839,0.89	-0.018
16057	ENSG00000188313	PLSCR1	chr3	-	146537995	146538044	146536539	146536565	146544466	146544547	16057	39,37,5,2,39,39,8,4,51,72,4,3,3,8,7,7,15,10,14,20,7,5,8,6,32,18,40,35,2,14,16,3,1,3,11,10,2,3,6,8,25,35,5,4,9,4,5,8,6,8,3,8,7,14,25,27,18,15,4,11,51,47,37,35,14,10,8,6,22,10,4,7,5,6,11,15,15,7,22,33,11,12,9,11,5,8,8,5,11,9,0,4,5,5,3,9,0,2,3,0,8,8,9,5,39,34,20,24,56,71,3,6,0,0,20,25,3,6,15,8,26,22,31,30,9,7,43,45,9,11,1,0,0,1,5,12,14,19,8,10,8,2,36,27,5,4,76,59,16,18,25,18,12,5,7,2,16,21,9,6,26,27…	428,458,34,32,315,321,46,47,398,368,30,36,31,45,79,103,109,108,173,147,45,49,129,110,137,144,153,163,66,62,71,76,41,61,96,89,54,48,46,35,159,163,71,58,126,120,67,68,97,76,53,61,130,125,178,194,47,62,84,78,235,262,67,58,126,123,67,63,133,144,80,52,32,35,68,59,48,49,234,199,45,57,109,91,48,60,60,48,115,123,39,42,54,67,43,47,8,11,19,15,55,62,125,98,175,169,110,117,364,394,27,47,8,4,104,107,19,21,76,…	8,1,12,17,7,7,1,2,10,11,6,4,18,20,20,29,8,8,35,23,9,8,12,10,1,1,1,2,23,18,11,7,7,4,10,9,0,0,0,1,7,8,2,3,1,1,0,4,4,1,5,5	35,56,123,110,49,59,44,56,43,47,69,71,133,108,219,212,145,163,164,184,139,119,133,133,32,21,47,51,131,155,128,136,132,125,192,215,8,5,10,13,74,72,31,46,6,5,45,57,5,9,71,70	99	50	3.21729e-08	3.8001e-06	0.044,0.039,0.069,0.031,0.059,0.058,0.081,0.041,0.061,0.09,0.063,0.04,0.047,0.082,0.043,0.033,0.065,0.045,0.039,0.064,0.073,0.049,0.03,0.027,0.106,0.059,0.117,0.098,0.015,0.102,0.102,0.02,0.012,0.024,0.055,0.054,0.018,0.031,0.062,0.103,0.074,0.098,0.034,0.034,0.035,0.017,0.036,0.056,0.03,0.05,0.028,0.062,0.026,0.054,0.066,0.066,0.162,0.109,0.023,0.066,0.099,0.083,0.218,0.234,0.053,0.039,0.057,0.0…	0.103,0.009,0.047,0.072,0.067,0.057,0.011,0.018,0.105,0.106,0.042,0.028,0.064,0.086,0.044,0.065,0.027,0.024,0.097,0.059,0.032,0.033,0.044,0.037,0.016,0.023,0.011,0.019,0.081,0.055,0.042,0.025,0.026,0.016,0.026,0.021,0.0,0.0,0.0,0.037,0.046,0.053,0.032,0.032,0.078,0.092,0.0,0.034,0.288,0.053,0.034,0.035	0.009
16332	ENSG00000064666	CNN2	chr19	+	1036878	1037000	1036415	1036562	1037624	1038309	16332	2,2,4,2,19,11,3,7,3,2,11,7,5,5,4,5,3,8,17,14,6,2,4,5,11,3,10,5,6,4,5,3,4,3,3,4,5,4,7,9,14,14,7,6,3,4,8,8,5,4,5,8,10,13,10,19,8,4,14,8,3,6,26,32,13,11,8,8,5,6,7,7,2,1,5,2,10,7,5,4,11,5,7,2,5,14,4,1,23,26,6,5,3,1,8,6,3,0,1,1,2,3,0,0,0,0,7,9,36,24,8,5,1,1,6,16,6,1,5,6,7,7,5,5,5,4,5,2,2,8,19,4,12,7,3,7,6,4,11,6,3,6,1,3,4,7,3,4,9,9,7,10,2,6,3,4,7,5,4,1,4,2,3,6,5,10,1,5,2,4,11,12,10,16,3,4,7,4,9,12,3,5…	137,131,89,87,186,178,71,76,70,85,109,105,81,73,90,89,109,113,220,204,78,77,138,111,44,41,84,86,94,84,58,58,99,90,158,130,56,46,112,86,109,93,41,48,87,87,83,76,194,204,73,81,73,109,88,99,85,92,48,67,59,84,58,69,166,169,64,90,203,158,82,63,35,34,42,48,95,95,58,78,177,173,72,80,90,92,38,36,78,104,74,79,32,30,68,70,48,55,35,28,107,97,33,31,24,25,81,86,117,143,148,151,43,49,109,108,92,95,74,53,86,87,…	11,18,4,3,2,3,3,6,11,10,9,5,15,14,1,2,6,5,8,6,13,17,15,22,10,13,18,14,4,5,15,6,18,10,16,5,1,1,5,7,6,6,11,13,0,3,11,15,2,2,5,6	159,168,124,144,81,70,73,82,199,170,194,152,135,121,104,135,202,204,228,194,267,282,232,240,161,183,214,221,221,190,220,192,283,267,199,206,36,39,62,72,185,177,116,118,21,30,121,127,61,50,111,90	100	50	1.52156e-05	0.0011966	0.007,0.008,0.022,0.011,0.049,0.03,0.021,0.044,0.021,0.012,0.048,0.032,0.03,0.033,0.022,0.027,0.014,0.034,0.037,0.033,0.037,0.013,0.014,0.022,0.111,0.035,0.056,0.028,0.031,0.023,0.041,0.025,0.02,0.016,0.009,0.015,0.043,0.042,0.03,0.05,0.06,0.07,0.079,0.059,0.017,0.022,0.046,0.05,0.013,0.01,0.033,0.047,0.064,0.056,0.054,0.088,0.045,0.021,0.127,0.056,0.025,0.034,0.183,0.188,0.038,0.032,0.059,0.043,…	0.033,0.051,0.016,0.01,0.012,0.021,0.02,0.035,0.027,0.029,0.023,0.016,0.053,0.055,0.005,0.007,0.015,0.012,0.017,0.015,0.024,0.029,0.031,0.044,0.03,0.034,0.04,0.031,0.009,0.013,0.033,0.015,0.031,0.018,0.039,0.012,0.014,0.013,0.039,0.046,0.016,0.017,0.045,0.052,0.0,0.048,0.043,0.056,0.016,0.02,0.022,0.032	0.01
16566	ENSG00000167851	CD300A	chr17	+	74473535	74473874	74466633	74466743	74474531	74474685	16566	678,759,303,290,1140,1157,370,398,1091,953,402,413,530,523,449,464,275,290,482,500,354,345,391,396,914,850,387,423,379,362,489,536,335,276,694,600,577,562,587,575,598,577,370,352,500,472,496,442,440,474,565,551,552,544,601,671,384,330,246,216,467,484,52,50,598,629,562,529,838,851,531,524,297,254,527,558,320,356,511,496,371,368,671,714,530,511,499,459,812,742,472,397,701,745,558,560,393,368,173,16…	37,33,11,17,26,25,17,9,41,51,36,27,4,8,15,11,9,18,15,19,10,4,5,5,17,19,66,63,8,6,23,23,13,20,30,30,20,22,60,40,16,30,14,14,22,14,40,42,11,10,9,10,23,7,33,23,25,24,8,2,24,17,38,29,22,30,26,23,54,55,19,26,26,30,23,17,20,26,19,17,37,30,18,17,23,29,6,13,40,41,19,31,13,27,41,31,14,29,7,13,51,47,18,12,24,31,38,28,50,38,11,4,15,10,24,24,25,24,10,11,12,11,10,19,6,6,31,29,29,30,18,13,2,4,8,4,1,2,14,18,12,…	507,476,436,392,277,296,369,337,251,285,653,665,457,440,480,483,792,725,643,604,712,659,731,749,464,442,554,510,644,640,562,599,527,575,582,621,280,307,242,229,519,516,598,574,87,111,156,132,213,207,381,422	28,19,27,22,11,17,11,14,45,42,23,11,45,29,15,9,26,21,22,17,21,23,22,15,19,22,96,95,16,17,28,28,14,9,8,10,16,17,6,14,32,27,47,39,13,8,14,12,8,8,15,20	100	50	0.000266264	0.0166162	0.902,0.92,0.932,0.895,0.956,0.959,0.916,0.957,0.93,0.903,0.848,0.884,0.985,0.97,0.937,0.955,0.939,0.89,0.941,0.929,0.947,0.977,0.975,0.975,0.964,0.957,0.746,0.77,0.959,0.968,0.914,0.921,0.928,0.873,0.92,0.909,0.935,0.927,0.83,0.878,0.949,0.906,0.93,0.926,0.919,0.944,0.861,0.84,0.952,0.96,0.969,0.965,0.923,0.975,0.901,0.936,0.885,0.873,0.939,0.982,0.907,0.934,0.406,0.463,0.931,0.913,0.915,0.92,0.…	0.901,0.926,0.89,0.899,0.926,0.897,0.944,0.923,0.736,0.772,0.934,0.968,0.835,0.884,0.941,0.964,0.938,0.945,0.936,0.947,0.944,0.935,0.943,0.961,0.924,0.909,0.743,0.729,0.953,0.95,0.909,0.915,0.95,0.97,0.973,0.969,0.897,0.9,0.953,0.891,0.89,0.905,0.864,0.88,0.77,0.874,0.848,0.846,0.93,0.928,0.927,0.913	0.014
16726	ENSG00000137965	IFI44	chr1	+	78660553	78660654	78659311	78659483	78662703	78662756	16726	1226,1364,59,45,2050,2005,75,90,363,363,71,68,194,163,56,48,91,96,340,329,127,122,84,70,625,638,276,290,19,19,140,141,66,63,157,169,184,152,92,77,220,175,54,39,51,43,37,31,84,92,63,76,170,173,137,140,74,59,82,87,695,661,51,36,406,394,94,86,298,279,169,140,66,64,133,136,105,90,309,274,32,36,127,119,25,32,133,126,35,27,17,21,48,36,175,148,82,80,19,23,204,206,807,839,659,694,664,695,887,879,174,153,…	182,193,7,7,270,256,8,12,30,39,4,7,22,24,8,3,11,18,72,49,30,29,4,1,83,74,40,34,1,1,19,14,7,4,11,14,15,18,20,18,40,42,8,12,6,4,7,4,13,9,20,24,28,16,44,31,10,7,1,6,85,90,6,19,63,60,17,12,58,65,27,32,10,10,28,31,17,18,53,65,1,3,13,23,1,0,3,11,8,7,3,1,4,1,16,21,22,20,2,0,12,19,189,209,120,125,128,129,178,139,23,20,26,18,43,30,20,20,52,43,163,162,201,179,5,4,163,177,296,262,35,26,11,7,43,36,304,302,44…	28,20,41,42,278,292,407,402,54,49,23,30,447,405,40,36,145,164,206,211,35,34,22,22,71,73,11,15,256,245,50,63,19,22,63,80,79,74,64,52,327,331,46,55,224,205,25,17,47,72,83,92	3,1,3,3,22,18,36,19,7,8,2,1,70,69,2,1,20,13,19,18,6,2,3,0,3,8,2,1,29,26,2,3,5,4,9,10,4,5,2,5,39,45,11,10,40,41,1,0,5,13,6,4	100	50	8.69197e-11	1.44062e-08	0.771,0.779,0.808,0.763,0.792,0.797,0.824,0.789,0.858,0.823,0.899,0.829,0.815,0.773,0.778,0.889,0.805,0.727,0.702,0.77,0.679,0.678,0.913,0.972,0.79,0.812,0.775,0.81,0.905,0.905,0.787,0.834,0.825,0.887,0.877,0.858,0.86,0.809,0.697,0.681,0.733,0.676,0.771,0.619,0.81,0.843,0.725,0.795,0.764,0.836,0.612,0.613,0.752,0.844,0.609,0.693,0.787,0.808,0.976,0.879,0.803,0.786,0.81,0.486,0.763,0.767,0.734,0.7…	0.824,0.909,0.872,0.875,0.863,0.89,0.85,0.914,0.794,0.754,0.852,0.938,0.761,0.746,0.909,0.947,0.784,0.863,0.844,0.854,0.745,0.895,0.786,1.0,0.922,0.82,0.733,0.882,0.815,0.825,0.926,0.913,0.655,0.733,0.778,0.8,0.908,0.881,0.941,0.839,0.807,0.786,0.676,0.733,0.737,0.714,0.926,1.0,0.825,0.735,0.874,0.92	-0.059
16742	ENSG00000186635	ARAP1	chr11	-	72692752	72692785	72688454	72688537	72693324	72693470	16742	54,45,38,36,31,43,42,44,71,60,46,45,17,28,21,37,29,21,83,74,28,26,49,44,31,21,30,24,20,20,52,42,61,39,64,43,35,42,46,54,98,109,33,23,34,32,62,51,66,51,29,39,37,29,36,52,59,58,30,36,25,20,71,68,38,43,37,39,86,68,25,28,17,17,34,42,52,62,11,16,85,121,61,46,29,26,36,35,61,51,55,38,15,7,59,66,77,83,25,27,56,69,14,12,17,27,48,53,67,80,34,44,97,101,40,42,55,56,30,41,36,36,39,26,91,89,37,39,63,68,47,34,6…	92,101,76,61,152,174,71,63,112,127,111,109,75,78,106,88,121,123,141,142,50,66,231,210,80,102,103,98,134,128,64,91,98,103,139,128,116,93,141,135,182,210,76,61,129,102,140,163,109,124,153,174,180,175,147,155,174,141,85,79,52,70,48,46,154,176,121,113,255,228,119,139,57,62,101,105,97,91,74,84,223,186,225,216,171,211,192,165,202,232,125,168,161,140,218,175,310,307,29,39,188,146,58,78,62,56,99,86,108,1…	91,100,58,75,147,139,151,157,103,115,100,118,52,53,89,90,104,112,47,55,102,88,40,42,92,81,109,113,51,63,82,74,114,123,62,56,88,84,142,137,177,174,91,102,131,103,58,63,117,117,73,75	3.18327e+155	83	50	4.44256e-12	8.61353e-10	0.261,0.212,0.231,0.262,0.109,0.13,0.263,0.296,0.276,0.222,0.2,0.199,0.12,0.178,0.107,0.202,0.126,0.093,0.262,0.239,0.252,0.192,0.113,0.112,0.189,0.11,0.149,0.129,0.082,0.086,0.329,0.218,0.273,0.186,0.217,0.168,0.154,0.214,0.164,0.194,0.245,0.238,0.207,0.185,0.137,0.159,0.211,0.159,0.267,0.199,0.102,0.119,0.11,0.091,0.129,0.168,0.17,0.199,0.175,0.215,0.225,0.147,0.471,0.471,0.129,0.128,0.156,0.17…	0.147,0.156,0.164,0.195,0.301,0.292,0.381,0.363,0.271,0.3,0.148,0.169,0.228,0.242,0.255,0.241,0.224,0.214,0.186,0.198,0.199,0.178,0.102,0.106,0.243,0.215,0.189,0.185,0.14,0.18,0.148,0.156,0.208,0.208,0.155,0.141,0.205,0.199,0.249,0.245,0.28,0.256,0.223,0.249,0.275,0.24,0.204,0.205,0.245,0.247,0.147,0.157	-0.033
17464	ENSG00000114626	ABTB1	chr3	+	127679572	127679679	127677675	127677843	127679984	127680063	17464	4,8,15,13,19,10,14,12,6,5,8,15,6,3,3,1,11,12,21,28,1,2,6,14,3,7,23,33,19,24,9,12,11,11,9,5,6,10,26,15,21,13,8,7,3,10,15,16,4,7,10,6,13,12,20,12,30,47,18,14,7,13,12,20,10,20,10,7,20,20,6,7,5,1,9,3,21,24,21,16,43,37,4,4,14,7,4,3,3,8,8,8,7,18,8,8,26,27,9,11,12,13,3,1,3,1,14,23,5,6,7,9,20,31,11,8,16,19,2,5,12,6,9,8,12,9,12,10,13,12,19,10,13,9,5,6,6,2,17,10,6,7,3,0,4,4,11,3,15,7,7,15,1,8,17,7,6,9,8,8,…	51,96,61,57,153,139,42,47,25,26,94,84,45,38,49,57,120,120,236,227,18,30,71,80,28,34,75,102,75,80,35,32,101,87,105,102,35,28,153,102,71,88,30,36,54,56,125,131,67,87,78,87,100,63,142,117,218,190,40,46,49,47,72,57,134,133,50,54,193,176,52,46,31,36,91,102,132,125,72,64,357,361,60,47,151,123,38,31,44,42,68,77,27,41,132,140,211,207,58,52,91,90,18,15,15,19,67,57,51,35,67,84,346,402,38,48,60,51,36,24,89,…	25,20,16,21,25,30,9,7,44,45,27,35,15,14,11,13,14,23,9,13,11,13,19,20,16,12,11,22,15,12,17,16,48,17,36,36,37,20,22,20,39,39,35,23,19,22,25,27,13,24,36,40	449,442,159,174,228,196,75,57,183,164,596,602,99,106,167,150,215,175,103,80,244,243,237,235,244,210,414,422,170,177,264,257,384,380,187,173,112,124,336,320,508,507,182,189,295,279,163,178,209,205,301,264	100	50	1.28015e-10	2.05544e-08	0.038,0.04,0.109,0.102,0.058,0.035,0.143,0.113,0.107,0.088,0.041,0.082,0.062,0.038,0.03,0.009,0.044,0.048,0.043,0.058,0.027,0.032,0.041,0.08,0.051,0.093,0.133,0.139,0.112,0.13,0.114,0.158,0.052,0.059,0.041,0.024,0.079,0.152,0.078,0.068,0.129,0.069,0.118,0.089,0.027,0.082,0.057,0.058,0.029,0.039,0.06,0.033,0.061,0.087,0.066,0.049,0.064,0.11,0.184,0.132,0.067,0.121,0.077,0.149,0.036,0.07,0.091,0.06…	0.027,0.022,0.048,0.057,0.052,0.071,0.057,0.058,0.107,0.121,0.022,0.028,0.07,0.062,0.032,0.042,0.032,0.062,0.042,0.075,0.022,0.026,0.039,0.041,0.032,0.028,0.013,0.025,0.042,0.033,0.031,0.03,0.059,0.022,0.088,0.094,0.142,0.075,0.032,0.03,0.037,0.037,0.088,0.057,0.031,0.038,0.071,0.07,0.03,0.055,0.056,0.07	0.018
17598	ENSG00000082701	GSK3B	chr3	-	119866589	119866628	119863418	119863605	119876412	119876508	17598	5,5,5,4,2,8,10,7,19,7,4,8,5,3,13,5,3,5,3,6,5,1,17,7,6,7,4,5,6,8,6,1,15,9,5,5,4,8,10,13,5,6,10,7,18,16,13,14,8,7,9,16,9,6,11,10,8,3,4,9,6,2,9,0,2,3,7,11,14,14,7,11,5,5,8,9,6,4,3,5,6,6,14,19,12,9,11,9,20,16,16,7,13,11,15,20,18,12,1,5,10,3,5,4,1,2,2,10,4,8,3,6,8,12,11,8,2,5,6,4,4,4,4,4,8,10,2,4,8,5,7,13,4,8,1,1,7,4,3,9,3,1,1,4,3,6,3,4,1,3,5,3,7,6,8,13,5,7,7,6,2,5,1,6,11,19,3,7,5,4,14,12,7,5,5,6,11,1…	28,19,17,13,17,20,34,23,27,35,31,24,19,28,28,37,27,17,31,29,31,29,41,36,32,24,47,54,29,36,27,33,24,19,32,36,24,29,48,48,49,43,39,41,47,37,52,42,24,19,41,33,34,42,51,41,36,42,29,22,10,18,30,25,24,13,33,35,47,52,18,22,18,23,22,25,31,39,27,36,61,63,37,44,50,40,45,29,62,68,42,55,39,41,38,44,49,28,14,12,43,53,19,12,17,16,21,32,23,28,36,26,18,27,29,29,35,28,17,24,28,26,18,33,37,44,28,20,31,25,31,29,28,…	15,15,19,18,2,3,5,5,15,10,11,14,2,4,5,2,14,9,9,6,20,18,24,19,2,6,12,11,11,12,19,17,24,18,20,24,17,12,4,6,6,8,17,19,2,6,7,5,5,6,22,12	40,48,57,56,35,40,23,29,23,19,45,41,21,20,29,27,35,31,44,27,49,36,49,49,18,19,29,34,19,29,55,44,68,58,52,57,36,53,23,57,32,31,44,32,6,16,40,60,38,35,37,43	89	50	3.26959e-07	3.41677e-05	0.091,0.129,0.142,0.147,0.062,0.183,0.142,0.146,0.283,0.101,0.068,0.158,0.129,0.057,0.207,0.071,0.059,0.142,0.052,0.104,0.083,0.019,0.189,0.098,0.095,0.141,0.046,0.049,0.104,0.111,0.111,0.017,0.26,0.21,0.081,0.072,0.086,0.134,0.105,0.132,0.054,0.073,0.126,0.088,0.177,0.195,0.123,0.158,0.158,0.171,0.11,0.214,0.129,0.074,0.108,0.121,0.111,0.039,0.072,0.187,0.252,0.059,0.144,0.0,0.045,0.115,0.106,0.…	0.174,0.149,0.158,0.153,0.031,0.04,0.109,0.088,0.268,0.228,0.121,0.161,0.051,0.101,0.088,0.04,0.183,0.14,0.103,0.111,0.187,0.219,0.216,0.179,0.059,0.151,0.189,0.154,0.245,0.189,0.163,0.178,0.165,0.148,0.178,0.191,0.21,0.113,0.089,0.056,0.095,0.127,0.178,0.25,0.158,0.174,0.09,0.045,0.069,0.088,0.25,0.136	-0.027
17832	ENSG00000137752	CASP1	chr11	-	105026225	105026356	105025507	105025600	105026841	105026951	17832	565,653,300,252,1490,1427,317,363,1075,997,376,323,297,275,411,406,308,333,478,441,264,285,484,501,780,703,544,543,320,315,518,438,316,323,463,495,531,513,430,423,694,631,511,476,538,502,450,434,360,389,531,544,800,780,609,578,446,464,398,395,634,604,116,112,571,527,374,345,860,868,499,513,317,251,495,548,372,347,494,482,414,442,712,698,560,511,529,475,722,656,403,392,439,446,454,446,640,573,148,…	5,4,2,4,4,11,6,3,11,15,1,3,0,3,1,4,2,2,3,1,5,4,0,1,6,2,3,1,7,0,10,8,0,3,3,5,5,3,3,3,3,3,1,1,3,2,3,2,0,1,4,5,6,11,8,7,6,4,8,6,1,4,4,3,2,1,5,5,7,6,2,2,3,4,9,5,2,1,1,2,2,0,1,3,11,13,5,2,3,5,14,9,8,8,7,4,4,3,3,1,1,4,6,3,1,2,2,10,11,11,2,1,0,8,4,3,0,6,7,3,6,4,1,2,1,0,0,4,141,138,2,1,0,0,0,2,2,1,1,0,12,8,4,3,1,1,3,6,1,0,5,6,3,1,4,1,5,0,0,0,7,6,1,0,0,1,7,2,1,2,6,7,3,4,4,4,0,1,3,3,12,13,2,1,7,8,1,2,5,0,0…	7.11661e+155	0,5,6,3,1,3,3,0,3,1,1,3,1,2,1,0,2,3,0,2,0,0,0,4,0,0,3,4,3,3,3,2,1,2,5,4,5,4,10,9,4,7,12,9,4,6,0,0,3,3,1,1	100	50	2.35881e-09	3.30533e-07	0.983,0.988,0.987,0.969,0.995,0.985,0.964,0.984,0.98,0.971,0.995,0.982,1.0,0.979,0.995,0.981,0.987,0.988,0.988,0.995,0.964,0.973,1.0,0.996,0.985,0.994,0.989,0.996,0.958,1.0,0.963,0.965,1.0,0.982,0.987,0.98,0.982,0.988,0.986,0.986,0.991,0.991,0.996,0.996,0.989,0.992,0.987,0.991,1.0,0.995,0.985,0.982,0.985,0.973,0.974,0.976,0.974,0.983,0.961,0.971,0.997,0.987,0.935,0.949,0.993,0.996,0.974,0.972,0.9…	1.0,0.985,0.974,0.987,0.998,0.993,0.99,1.0,0.98,0.991,0.996,0.989,0.995,0.99,0.996,1.0,0.995,0.992,1.0,0.993,1.0,1.0,1.0,0.983,1.0,1.0,0.99,0.985,0.988,0.987,0.991,0.994,0.994,0.989,0.981,0.985,0.979,0.984,0.966,0.965,0.989,0.98,0.953,0.964,0.985,0.978,1.0,1.0,0.989,0.989,0.997,0.997	-0.006
18131	ENSG00000169220	RGS14	chr5	+	177371474	177371589	177371349	177371396	177371872	177372166	18131	260,302,154,142,428,379,182,165,159,180,242,205,190,228,241,234,292,282,362,351,104,105,249,238,152,119,262,243,320,365,163,169,247,210,300,267,134,133,344,320,307,313,120,111,280,264,298,280,329,268,262,279,285,255,321,318,225,269,110,111,149,134,49,59,329,358,131,153,403,407,226,211,91,82,195,195,176,170,204,249,461,474,187,201,400,357,127,155,178,180,214,205,163,192,367,373,397,301,95,90,292,3…	15,12,12,17,19,16,5,6,6,3,15,15,10,5,4,4,3,2,24,30,3,9,17,9,10,5,20,12,10,11,15,14,9,10,15,9,10,4,17,27,19,21,6,7,7,8,25,14,9,2,13,10,12,13,29,21,21,22,11,13,17,9,28,39,15,13,12,6,26,27,4,9,9,3,11,17,4,8,8,6,52,37,7,9,15,26,2,3,9,8,6,7,5,2,27,27,20,21,11,10,7,17,1,4,4,3,15,22,19,19,17,18,34,31,11,10,14,15,7,5,13,16,1,5,4,5,9,13,19,17,11,16,2,5,1,0,1,5,5,9,15,15,1,1,5,5,12,5,19,11,18,16,3,2,5,6,11…	5.36478e+155	9,12,17,20,13,5,4,11,38,35,14,8,22,20,5,8,7,8,7,4,5,8,12,15,9,15,14,21,15,11,9,8,25,30,14,17,9,12,22,19,44,36,26,21,8,5,16,20,8,14,15,16	100	50	1.011e-08	1.27213e-06	0.897,0.926,0.865,0.807,0.918,0.922,0.948,0.932,0.93,0.968,0.89,0.872,0.905,0.958,0.968,0.967,0.98,0.986,0.883,0.854,0.945,0.854,0.88,0.93,0.884,0.922,0.868,0.91,0.941,0.943,0.845,0.858,0.932,0.913,0.909,0.937,0.87,0.943,0.91,0.856,0.89,0.882,0.909,0.888,0.952,0.943,0.856,0.909,0.948,0.985,0.91,0.933,0.922,0.907,0.847,0.883,0.843,0.859,0.833,0.81,0.814,0.882,0.467,0.431,0.916,0.932,0.845,0.927,0.…	0.968,0.952,0.926,0.902,0.928,0.968,0.977,0.935,0.816,0.799,0.956,0.973,0.845,0.86,0.975,0.959,0.972,0.967,0.967,0.978,0.984,0.974,0.951,0.944,0.945,0.924,0.935,0.918,0.938,0.954,0.966,0.973,0.931,0.922,0.938,0.924,0.943,0.909,0.886,0.896,0.853,0.877,0.857,0.872,0.932,0.957,0.922,0.898,0.95,0.917,0.947,0.942	-0.022
18192	ENSG00000144744	UBA3	chr3	-	69080111	69080153	69077338	69077918	69080333	69080363	18192	196,222,88,80,58,82,154,120,228,197,78,91,164,156,164,143,120,130,99,79,161,160,114,87,181,165,163,164,99,88,223,203,94,94,122,122,170,179,158,152,139,149,193,176,153,108,141,137,107,106,91,77,101,99,118,123,50,42,131,136,129,148,30,49,123,96,112,100,203,196,69,77,64,53,51,62,71,43,173,173,55,56,97,82,31,51,148,108,94,93,68,72,96,60,9,22,9,5,14,18,79,85,35,33,99,98,139,129,104,114,111,151,1,3,138…	54,47,14,22,20,15,25,16,28,41,10,3,20,20,23,11,18,22,14,19,24,23,31,17,24,24,45,34,21,14,28,42,18,27,35,22,24,43,23,21,32,23,24,26,22,6,18,17,15,18,22,16,15,22,23,8,16,5,14,12,30,24,6,2,19,24,13,23,33,32,23,16,13,10,12,7,11,11,36,41,14,14,12,18,6,4,18,29,15,30,5,8,21,21,0,3,1,4,1,1,21,22,12,5,18,26,18,17,14,19,21,14,1,0,27,35,14,16,36,33,12,4,24,20,18,18,35,40,4,5,10,3,2,0,20,24,18,21,16,16,9,10,…	51,43,125,106,19,21,48,55,83,102,88,60,92,109,156,118,83,104,159,156,91,77,129,112,72,51,111,82,152,146,85,78,144,108,97,82,13,16,9,10,25,21,87,93,3,2,20,10,9,6,123,101	6,6,17,13,4,3,5,1,19,22,9,6,18,14,19,8,19,23,32,25,14,14,19,13,12,10,22,27,30,27,6,16,11,12,8,5,1,0,1,1,4,1,10,12,2,0,0,1,2,0,15,16	92	50	0.000456161	0.0267348	0.664,0.72,0.774,0.664,0.612,0.748,0.77,0.803,0.816,0.723,0.809,0.943,0.817,0.809,0.795,0.876,0.784,0.763,0.794,0.693,0.785,0.791,0.667,0.736,0.804,0.789,0.663,0.724,0.719,0.774,0.812,0.724,0.739,0.654,0.655,0.751,0.794,0.693,0.789,0.797,0.702,0.779,0.814,0.786,0.791,0.907,0.81,0.814,0.795,0.762,0.692,0.723,0.785,0.71,0.736,0.893,0.629,0.82,0.836,0.86,0.7,0.77,0.731,0.93,0.779,0.685,0.824,0.703,0…	0.822,0.796,0.8,0.816,0.721,0.792,0.839,0.968,0.704,0.716,0.842,0.845,0.735,0.809,0.817,0.889,0.704,0.711,0.73,0.772,0.779,0.749,0.787,0.824,0.765,0.735,0.733,0.623,0.734,0.746,0.885,0.726,0.877,0.83,0.868,0.899,0.876,1.0,0.83,0.845,0.773,0.919,0.825,0.808,0.449,1.0,1.0,0.845,0.71,1.0,0.817,0.774	-0.05
18193	ENSG00000132424	PNISR	chr6	-	99403828	99403882	99402539	99402710	99404602	99404702	18193	60,76,49,48,35,46,100,105,82,58,52,69,92,85,76,63,73,75,58,48,159,143,91,89,86,110,71,64,71,72,136,142,68,66,92,73,96,85,64,66,58,54,41,57,64,53,66,76,92,98,70,69,105,109,64,69,22,35,140,128,40,32,67,66,61,69,83,101,132,118,25,32,31,28,35,27,15,21,77,54,22,26,48,46,16,21,35,49,85,65,36,30,53,61,10,10,4,6,2,1,59,53,11,11,69,58,42,55,91,96,105,106,6,11,150,134,76,82,75,71,44,35,60,54,40,41,65,73,15…	9,5,3,3,5,9,4,7,4,8,8,4,6,4,5,4,8,12,2,3,11,3,15,12,15,6,19,23,5,14,1,6,7,4,8,5,9,6,10,10,13,13,5,8,7,5,10,3,5,1,9,9,32,20,20,9,3,5,11,6,3,2,16,13,6,8,9,8,11,12,5,8,5,4,2,3,1,0,14,8,4,7,6,9,2,2,5,13,6,18,3,5,11,15,1,2,0,0,0,0,5,4,1,4,5,10,7,5,21,12,7,16,0,0,14,6,8,4,10,13,1,2,4,8,3,1,8,7,5,1,0,1,0,0,9,8,2,7,3,4,0,1,7,8,1,9,8,5,5,2,4,3,8,5,1,3,0,7,1,3,5,6,5,2,2,1,2,4,1,3,4,10,5,0,2,0,7,5,3,3,4,3,1…	21,15,101,79,13,17,31,28,59,74,35,33,94,117,40,30,62,50,26,35,30,28,44,47,39,42,31,29,87,98,28,29,38,32,55,69,9,6,15,8,6,18,83,74,2,2,5,6,8,14,61,47	0,0,7,8,0,0,0,0,4,4,3,1,3,2,1,0,5,3,3,2,1,0,6,6,2,4,4,4,7,8,7,3,2,2,2,9,0,0,5,0,0,0,3,3,0,0,1,0,0,1,4,0	100	50	1.00984e-09	1.4967e-07	0.769,0.884,0.891,0.889,0.778,0.719,0.926,0.882,0.911,0.784,0.765,0.896,0.885,0.914,0.884,0.887,0.82,0.758,0.935,0.889,0.878,0.96,0.752,0.788,0.741,0.902,0.651,0.582,0.877,0.72,0.986,0.922,0.829,0.892,0.852,0.88,0.842,0.876,0.762,0.767,0.69,0.675,0.804,0.781,0.821,0.841,0.767,0.927,0.902,0.98,0.795,0.793,0.621,0.732,0.615,0.793,0.786,0.778,0.864,0.914,0.87,0.889,0.677,0.717,0.836,0.812,0.822,0.86…	1.0,1.0,0.878,0.832,1.0,1.0,1.0,1.0,0.881,0.902,0.854,0.943,0.94,0.967,0.952,1.0,0.861,0.893,0.812,0.897,0.938,1.0,0.786,0.797,0.907,0.84,0.795,0.784,0.861,0.86,0.667,0.829,0.905,0.889,0.932,0.793,1.0,1.0,0.6,1.0,1.0,1.0,0.933,0.925,1.0,1.0,0.714,1.0,1.0,0.875,0.884,1.0	-0.068
18223	ENSG00000163636	PSMD6	chr3	-	64022642	64022801	64022317	64022523	64023274	64023472	18223	7,10,5,4,4,3,4,1,9,7,3,3,5,4,6,4,4,6,9,9,2,6,17,6,3,7,5,9,7,12,10,6,5,2,3,6,3,5,6,6,6,2,5,4,3,2,6,3,7,7,4,1,5,8,1,4,2,1,1,3,5,8,2,4,5,8,9,2,16,10,8,5,0,0,0,1,2,1,1,6,1,2,8,1,3,2,14,12,7,1,2,6,9,12,2,1,0,2,0,0,5,4,0,2,2,3,0,2,2,5,7,7,0,0,4,4,2,0,8,10,7,4,7,12,6,4,6,7,3,5,5,6,0,1,7,8,4,3,3,5,0,1,1,3,1,0,5,8,2,10,3,3,8,18,1,1,8,1,0,1,4,7,3,4,0,2,4,8,1,1,1,5,0,3,5,2,4,3,0,2,1,5,4,7,1,1,4,3,1,0,0,3,3,…	23,21,24,20,17,26,19,19,23,23,14,23,11,23,13,21,19,35,26,28,26,44,16,18,37,25,27,33,16,15,29,30,23,17,20,33,26,25,21,29,27,33,19,27,16,18,16,18,25,29,19,22,33,27,25,18,17,17,26,29,27,18,22,23,21,28,24,18,35,35,16,11,11,11,13,9,23,13,20,25,27,29,23,32,18,20,14,17,16,19,10,12,16,22,3,10,6,7,1,4,12,13,15,10,19,20,32,20,7,15,41,36,1,4,21,26,23,27,32,21,10,10,24,23,13,14,20,15,9,9,11,9,2,1,19,22,25,24…	3,2,2,5,0,2,1,1,2,1,8,4,9,1,1,2,6,5,2,7,5,2,4,3,4,2,4,3,5,1,5,3,1,2,2,3,0,0,0,1,6,2,4,2,0,0,0,0,1,2,1,4	14,12,18,23,9,10,19,15,15,17,7,11,24,31,34,25,27,28,31,30,16,24,32,18,21,19,23,23,23,38,21,23,37,37,19,13,2,3,2,3,9,5,15,20,1,2,4,12,2,3,24,28	100	50	1.7835e-06	0.000164616	0.132,0.192,0.094,0.091,0.105,0.055,0.095,0.026,0.164,0.132,0.097,0.061,0.185,0.08,0.188,0.087,0.095,0.079,0.148,0.138,0.037,0.064,0.347,0.143,0.039,0.123,0.085,0.12,0.179,0.286,0.147,0.091,0.098,0.056,0.07,0.083,0.055,0.091,0.125,0.094,0.1,0.029,0.116,0.069,0.086,0.053,0.158,0.077,0.123,0.108,0.095,0.022,0.07,0.129,0.02,0.1,0.056,0.029,0.019,0.049,0.085,0.182,0.043,0.08,0.106,0.125,0.158,0.053,0…	0.097,0.077,0.053,0.098,0.0,0.091,0.026,0.032,0.062,0.029,0.364,0.154,0.158,0.016,0.014,0.038,0.1,0.082,0.031,0.104,0.135,0.04,0.059,0.077,0.087,0.05,0.08,0.061,0.098,0.013,0.106,0.061,0.013,0.026,0.05,0.103,0.0,0.0,0.0,0.143,0.25,0.167,0.118,0.048,0.0,0.0,0.0,0.0,0.2,0.25,0.02,0.067	0.027
18251	ENSG00000131051	RBM39	chr20	-	35734185	35734257	35731915	35732135	35738967	35739017	18251	4,13,5,4,10,6,14,19,6,10,3,12,13,13,3,4,21,18,10,13,16,14,11,9,19,18,10,7,9,14,15,16,13,9,12,10,20,25,24,19,11,10,11,15,3,7,11,14,20,18,14,11,9,12,8,5,3,5,22,11,9,10,30,26,9,4,3,15,15,14,5,13,4,4,1,5,6,6,8,9,12,4,6,1,0,3,10,5,7,11,0,7,10,12,0,1,0,0,0,2,6,4,2,2,9,7,4,9,9,8,10,13,0,4,9,15,9,12,15,9,5,7,6,11,9,7,15,12,3,1,3,6,0,2,11,15,17,25,10,2,6,6,21,19,13,18,14,21,7,7,4,6,9,17,12,7,1,4,8,9,7,6,6…	127,136,92,73,75,75,165,189,155,156,106,108,152,143,214,182,155,163,113,112,192,195,164,187,170,145,156,159,157,137,179,188,158,125,154,177,249,213,168,177,158,167,104,112,138,121,179,155,159,159,134,123,144,133,131,131,51,52,170,184,70,84,240,252,97,111,140,134,227,206,81,75,97,63,44,73,42,31,130,129,55,84,109,116,25,34,127,112,135,134,68,71,107,109,22,29,16,10,10,7,128,111,44,35,113,127,76,90,1…	2,3,9,13,1,3,2,1,6,4,5,12,18,13,9,13,5,10,6,5,11,6,18,6,13,10,11,15,18,9,3,1,9,1,17,24,0,1,0,0,4,1,7,6,0,0,1,0,2,0,10,15	50,58,206,176,37,23,47,46,165,148,107,93,162,174,165,183,153,155,144,117,108,95,205,226,113,116,117,111,199,183,122,105,114,112,185,157,20,15,9,18,31,48,119,136,3,1,13,11,16,12,166,181	100	50	0.000555964	0.032036	0.016,0.046,0.026,0.027,0.062,0.038,0.041,0.048,0.019,0.031,0.014,0.053,0.041,0.043,0.007,0.011,0.063,0.052,0.042,0.055,0.04,0.035,0.032,0.023,0.053,0.058,0.031,0.022,0.028,0.049,0.04,0.041,0.04,0.035,0.037,0.027,0.039,0.055,0.067,0.051,0.034,0.029,0.05,0.063,0.011,0.028,0.03,0.043,0.059,0.054,0.05,0.043,0.03,0.043,0.03,0.019,0.029,0.046,0.061,0.029,0.06,0.056,0.059,0.049,0.044,0.018,0.011,0.053,…	0.02,0.025,0.021,0.036,0.013,0.061,0.021,0.011,0.018,0.013,0.023,0.061,0.053,0.036,0.027,0.034,0.016,0.031,0.02,0.021,0.048,0.031,0.042,0.013,0.054,0.041,0.045,0.063,0.043,0.024,0.012,0.005,0.038,0.004,0.044,0.071,0.0,0.032,0.0,0.0,0.061,0.01,0.029,0.022,0.0,0.0,0.037,0.0,0.059,0.0,0.029,0.04	0.012
18412	ENSG00000055955	ITIH4	chr3	-	52819753	52819990	52819392	52819518	52820290	52820317	18412	8,11,9,9,13,10,11,11,16,31,8,8,8,7,10,5,11,7,27,12,11,8,9,24,11,14,8,17,7,1,8,10,7,10,6,5,9,10,7,14,13,7,77,58,8,3,32,26,10,11,17,16,10,17,19,17,24,22,19,10,22,20,19,34,7,4,4,4,9,7,7,7,3,3,20,17,31,33,8,11,29,27,23,25,7,6,6,7,7,1,2,7,5,7,12,6,6,8,1,2,11,15,12,4,4,6,23,19,7,8,13,20,7,7,13,20,9,10,7,7,10,11,4,6,9,12,4,4,19,22,11,11,7,6,10,5,6,9,57,48,10,13,23,15,9,2,3,6,21,23,18,15,11,20,5,7,10,9,9…	0,1,0,0,3,0,6,4,0,0,4,1,1,3,2,0,0,0,0,9,1,0,2,0,1,0,1,2,0,0,1,1,3,1,2,0,0,0,0,5,0,0,12,11,0,3,4,3,0,0,0,4,0,0,0,2,1,2,0,4,0,0,2,3,0,0,0,0,0,0,0,0,0,0,1,4,2,4,0,0,4,8,2,1,1,1,0,1,0,0,2,1,0,0,0,1,0,0,0,0,1,2,0,2,1,0,4,3,0,0,4,2,2,1,0,0,2,0,0,1,4,2,0,0,1,2,0,0,1,1,1,0,0,1,0,2,2,0,2,3,1,1,0,1,0,0,0,0,5,7,3,0,1,0,0,1,0,2,2,1,1,2,0,5,1,0,5,5,0,1,2,0,2,4,0,0,0,0,4,1,3,3,0,0,0,0,1,0,5,0,1,1,2,0,4,1,2,0,0…	11,14,8,7,6,14,18,10,14,10,22,9,18,16,9,15,14,8,28,28,28,27,16,17,8,8,20,17,4,7,13,10,20,19,28,38,8,7,6,7,14,7,16,14,6,7,17,19,9,9,29,29	1,0,0,0,0,0,2,4,1,0,0,2,3,2,4,2,0,0,2,3,1,0,1,0,0,1,1,3,0,1,2,1,13,17,1,1,1,0,1,0,1,2,2,4,2,0,3,5,1,1,4,2	100	50	3.33067e-16	1.00665e-13	1.0,0.846,1.0,1.0,0.684,1.0,0.478,0.579,1.0,1.0,0.5,0.8,0.8,0.538,0.714,1.0,1.0,1.0,1.0,0.4,0.846,1.0,0.692,1.0,0.846,1.0,0.8,0.81,1.0,1.0,0.8,0.833,0.538,0.833,0.6,1.0,1.0,1.0,1.0,0.583,1.0,1.0,0.762,0.725,1.0,0.333,0.8,0.812,1.0,1.0,1.0,0.667,1.0,1.0,1.0,0.81,0.923,0.846,1.0,0.556,1.0,1.0,0.826,0.85,1.0,1.0,1.0,1.0,1.0,1.0,1.0,1.0,1.0,1.0,0.909,0.68,0.886,0.805,1.0,1.0,0.784,0.628,0.852,0.926,0…	0.846,1.0,1.0,1.0,1.0,1.0,0.818,0.556,0.875,1.0,1.0,0.692,0.75,0.8,0.529,0.789,1.0,1.0,0.875,0.824,0.933,1.0,0.889,1.0,1.0,0.8,0.909,0.739,1.0,0.778,0.765,0.833,0.435,0.358,0.933,0.95,0.8,1.0,0.75,1.0,0.875,0.636,0.8,0.636,0.6,1.0,0.739,0.655,0.818,0.818,0.784,0.879	0.02
18556	ENSG00000214253	FIS1	chr7	-	101244006	101244139	101240829	101240906	101244959	101245081	18556	154,161,148,159,137,103,193,186,75,68,241,184,208,191,100,78,168,192,225,252,256,230,108,100,233,190,150,132,90,89,225,194,184,165,222,213,143,136,157,146,141,112,87,67,67,55,134,149,225,221,127,133,136,124,85,99,178,176,138,150,145,94,166,173,231,191,174,191,295,280,97,127,90,66,109,127,239,260,102,106,248,259,119,105,115,86,88,91,114,72,185,155,71,66,231,211,311,327,326,313,209,220,34,33,70,60,…	1,4,1,2,0,2,4,1,1,3,8,6,8,4,1,1,7,7,11,1,2,2,5,5,3,3,3,1,2,2,11,6,1,1,2,4,0,2,2,0,0,1,0,0,3,0,5,1,4,2,2,2,3,2,2,1,4,2,0,5,2,0,0,0,3,7,7,5,13,3,2,0,1,0,1,0,0,5,0,2,1,6,2,1,1,1,4,0,4,3,2,4,2,0,6,4,8,6,1,0,0,2,0,3,1,1,1,0,2,2,6,2,4,8,4,0,4,7,1,4,1,5,3,1,0,2,4,4,3,4,11,8,8,8,3,2,3,3,0,1,2,5,3,3,3,4,1,2,1,3,1,0,2,3,2,2,0,3,2,4,0,1,5,6,5,8,1,1,5,3,0,1,7,3,6,4,4,4,9,6,7,3,2,3,4,3,0,2,4,1,5,2,4,1,4,2,1,0…	3.72338e+155	4,1,4,4,15,19,13,16,5,3,8,10,8,3,8,10,3,9,6,8,5,5,3,0,5,2,5,5,8,8,4,5,6,4,1,1,3,0,9,8,2,2,10,8,16,11,8,2,1,3,1,4	100	50	1.55153e-05	0.00121706	0.987,0.953,0.987,0.975,1.0,0.963,0.96,0.989,0.974,0.919,0.938,0.939,0.929,0.96,0.98,0.975,0.923,0.932,0.911,0.992,0.985,0.983,0.915,0.909,0.975,0.969,0.962,0.985,0.957,0.957,0.911,0.942,0.989,0.988,0.982,0.964,1.0,0.971,0.975,1.0,1.0,0.982,1.0,1.0,0.918,1.0,0.931,0.987,0.966,0.982,0.969,0.971,0.958,0.969,0.955,0.98,0.957,0.978,1.0,0.938,0.973,1.0,1.0,1.0,0.975,0.932,0.926,0.95,0.919,0.979,0.96,1…	0.979,0.994,0.963,0.963,0.922,0.905,0.964,0.952,0.975,0.984,0.946,0.93,0.957,0.985,0.954,0.933,0.981,0.945,0.945,0.919,0.957,0.958,0.966,1.0,0.974,0.991,0.969,0.97,0.928,0.925,0.98,0.975,0.955,0.97,0.988,0.987,0.982,1.0,0.959,0.967,0.99,0.989,0.946,0.946,0.933,0.953,0.941,0.985,0.995,0.985,0.994,0.976	0.005
18650	ENSG00000139626	ITGB7	chr12	-	53201071	53201194	53200242	53200446	53207201	53207251	18650	131,137,62,48,50,28,133,129,38,37,108,114,211,203,15,12,117,130,48,48,284,206,38,55,148,143,24,19,32,21,182,154,74,71,86,82,67,75,22,25,25,17,8,9,7,12,18,15,77,85,34,26,46,58,18,26,17,11,64,78,44,47,14,16,94,90,66,58,90,146,36,17,16,25,29,15,6,15,39,43,15,18,60,62,10,12,38,39,27,31,42,60,54,42,15,26,24,30,6,2,67,90,33,30,102,85,35,25,98,89,230,182,30,28,145,117,162,180,125,122,56,74,67,54,6,17,84…	12,11,1,2,3,5,8,5,2,4,13,8,14,13,1,1,4,7,5,5,13,12,1,2,9,9,1,2,0,0,4,7,2,3,7,13,3,2,1,0,0,0,0,0,1,0,2,0,7,8,1,0,4,6,3,4,0,0,1,0,5,0,0,3,5,3,7,4,14,15,0,2,3,0,2,2,3,0,6,3,2,0,3,2,0,0,1,3,0,1,4,1,5,0,0,2,5,3,0,0,3,4,0,3,4,3,3,0,8,3,14,15,1,7,3,3,21,12,5,11,1,1,5,2,0,0,4,9,4,9,13,8,0,1,6,9,10,11,0,0,17,10,6,9,2,4,6,9,0,0,0,1,0,3,2,2,1,2,2,4,11,3,7,5,2,3,4,4,0,0,0,0,5,9,7,7,0,0,3,4,11,12,5,8,0,0,2,1,…	5,9,36,44,37,42,105,133,45,52,24,25,170,185,32,35,83,78,35,19,22,39,10,10,103,89,24,23,63,47,28,26,27,19,33,25,33,31,29,26,45,48,107,100,19,14,1,2,33,31,22,34	0,0,2,3,4,4,8,4,1,1,1,0,10,11,0,1,4,3,2,1,0,2,3,2,2,5,2,0,3,4,0,2,0,2,0,1,0,1,0,6,2,3,6,3,0,3,0,0,0,0,0,1	100	50	0.000620462	0.0355532	0.845,0.862,0.969,0.923,0.893,0.737,0.893,0.928,0.905,0.822,0.806,0.877,0.883,0.886,0.882,0.857,0.936,0.903,0.828,0.828,0.916,0.896,0.95,0.932,0.892,0.888,0.923,0.826,1.0,1.0,0.958,0.917,0.949,0.922,0.86,0.759,0.918,0.949,0.917,1.0,1.0,1.0,1.0,1.0,0.778,1.0,0.818,1.0,0.846,0.842,0.944,1.0,0.852,0.829,0.75,0.765,1.0,1.0,0.97,1.0,0.815,1.0,1.0,0.727,0.904,0.938,0.825,0.879,0.763,0.83,1.0,0.81,0.727…	1.0,1.0,0.9,0.88,0.822,0.84,0.868,0.943,0.957,0.963,0.923,1.0,0.895,0.894,1.0,0.946,0.912,0.929,0.897,0.905,1.0,0.907,0.625,0.714,0.963,0.899,0.857,1.0,0.913,0.855,1.0,0.867,1.0,0.826,1.0,0.926,1.0,0.939,1.0,0.684,0.918,0.889,0.899,0.943,1.0,0.7,1.0,1.0,1.0,1.0,1.0,0.944	-0.015
18743	ENSG00000030582	GRN	chr17	+	44345565	44345605	44345264	44345334	44349157	44349302	18743	13,16,2,3,9,8,1,1,0,1,4,6,3,2,3,6,2,3,10,9,3,2,7,5,2,2,1,6,2,2,4,4,8,5,5,4,2,1,3,1,5,4,2,1,1,1,4,2,5,4,0,2,8,5,1,4,0,0,1,1,6,3,3,4,1,4,3,4,6,9,1,2,0,0,0,1,2,3,6,3,3,6,3,3,4,2,4,6,6,4,1,0,4,4,2,4,2,10,1,1,8,11,5,2,1,0,5,6,5,7,7,3,1,8,2,2,6,2,5,2,8,4,5,4,4,3,4,5,7,16,5,6,3,4,2,2,7,5,1,5,2,3,12,6,4,4,3,4,3,3,1,1,1,5,0,0,3,3,2,2,2,3,3,0,0,1,4,3,3,0,2,0,0,0,1,2,2,1,5,4,1,0,2,11,7,1,0,6,5,4,4,1,4,3,4,2…	333,350,89,89,136,132,25,36,10,12,22,37,56,42,34,22,73,84,168,176,36,26,55,39,20,23,24,33,42,44,45,34,85,98,92,104,14,14,28,45,13,13,6,4,13,19,37,49,121,141,19,24,55,66,20,20,24,34,17,21,58,47,18,13,147,135,19,24,75,102,27,19,13,7,22,12,42,25,22,29,189,164,25,27,27,45,20,16,10,14,27,30,7,24,61,56,128,123,28,21,44,44,10,23,6,7,14,9,37,42,135,133,75,97,24,18,37,37,11,27,74,45,30,29,47,54,76,69,96,1…	2,1,3,1,0,2,7,4,5,6,4,3,2,2,1,3,6,4,1,4,2,3,4,3,3,0,0,4,7,4,0,7,9,4,2,3,0,2,5,5,3,5,0,3,1,0,5,1,0,0,1,2	123,101,96,85,30,38,361,317,96,85,153,137,52,53,111,98,153,179,96,99,77,96,57,50,121,117,172,170,174,175,169,176,144,141,44,58,25,24,63,90,292,308,88,84,15,26,51,33,63,54,87,84	90	50	4.21885e-15	1.16124e-12	0.021,0.025,0.012,0.018,0.035,0.033,0.022,0.015,0.0,0.044,0.092,0.083,0.029,0.026,0.047,0.132,0.015,0.019,0.032,0.028,0.044,0.041,0.066,0.066,0.053,0.046,0.023,0.092,0.026,0.025,0.047,0.061,0.05,0.028,0.029,0.021,0.074,0.038,0.056,0.012,0.176,0.146,0.156,0.122,0.041,0.028,0.057,0.022,0.022,0.016,0.0,0.044,0.075,0.04,0.027,0.1,0.0,0.0,0.032,0.026,0.054,0.034,0.085,0.146,0.004,0.016,0.081,0.085,0.0…	0.009,0.005,0.017,0.006,0.0,0.028,0.011,0.007,0.028,0.038,0.014,0.012,0.021,0.021,0.005,0.017,0.021,0.012,0.006,0.022,0.014,0.017,0.038,0.032,0.014,0.0,0.0,0.013,0.022,0.013,0.0,0.022,0.034,0.016,0.025,0.028,0.0,0.044,0.042,0.03,0.006,0.009,0.0,0.019,0.036,0.0,0.052,0.017,0.0,0.0,0.006,0.013	0.032
19215	ENSG00000151500	THYN1	chr11	-	134248808	134248959	134248278	134248484	134249166	134249262	19215	43,48,37,21,33,41,50,44,31,26,53,44,63,58,53,49,39,45,143,127,78,81,44,45,45,70,30,41,24,17,73,63,37,53,48,49,65,35,56,49,45,53,80,54,43,34,21,33,92,87,47,36,45,55,28,36,42,46,58,46,23,39,14,21,51,40,33,34,75,70,32,43,16,15,37,21,81,60,30,39,56,48,56,54,35,36,27,32,26,38,46,43,27,39,53,76,74,83,61,59,97,87,23,21,37,36,63,61,25,26,88,80,138,172,62,58,114,79,55,79,90,86,54,50,34,27,52,46,84,100,94,…	7,5,2,6,9,3,16,13,2,3,10,8,8,3,3,2,4,4,16,9,15,13,2,3,15,23,5,5,0,2,12,11,5,9,9,9,8,6,5,5,9,4,3,7,6,4,7,3,14,6,9,9,7,11,5,4,1,6,10,16,5,4,11,10,10,9,9,7,15,8,7,5,2,4,4,8,12,7,1,2,3,3,5,5,1,2,2,2,4,4,9,9,5,6,2,10,15,12,13,13,23,8,2,1,9,6,7,3,6,2,11,14,34,28,9,8,21,30,4,13,9,10,1,3,1,4,11,9,14,16,15,10,9,4,5,5,12,7,5,10,17,18,5,5,2,3,4,8,11,4,3,8,8,3,6,3,5,4,3,4,11,12,10,19,4,8,12,12,20,14,4,6,8,11…	80,80,53,35,114,119,157,152,67,60,64,81,106,83,68,58,67,106,86,85,70,65,27,30,92,99,80,98,63,55,72,60,63,68,50,46,127,103,99,96,84,75,56,68,193,166,65,76,146,145,88,78	8,4,11,8,32,28,24,31,13,9,3,8,15,19,16,13,13,10,8,8,8,17,3,5,21,16,7,13,11,15,13,10,15,7,3,7,26,15,26,33,10,12,20,21,22,27,15,21,27,27,11,16	100	50	0.00011367	0.00776991	0.754,0.828,0.902,0.636,0.647,0.872,0.61,0.629,0.886,0.812,0.726,0.733,0.797,0.906,0.898,0.925,0.83,0.849,0.817,0.876,0.722,0.757,0.917,0.882,0.6,0.603,0.75,0.804,1.0,0.81,0.753,0.741,0.787,0.746,0.727,0.731,0.802,0.745,0.848,0.831,0.714,0.869,0.93,0.794,0.782,0.81,0.6,0.846,0.767,0.879,0.723,0.667,0.763,0.714,0.737,0.818,0.955,0.793,0.744,0.59,0.697,0.83,0.389,0.512,0.718,0.69,0.647,0.708,0.714,…	0.833,0.909,0.707,0.686,0.64,0.68,0.766,0.71,0.72,0.769,0.914,0.835,0.779,0.686,0.68,0.69,0.72,0.841,0.843,0.842,0.814,0.657,0.818,0.75,0.687,0.756,0.851,0.79,0.741,0.647,0.735,0.75,0.677,0.829,0.893,0.767,0.709,0.774,0.656,0.593,0.808,0.758,0.583,0.618,0.814,0.755,0.684,0.644,0.73,0.729,0.8,0.709	0.038
19323	ENSG00000134072	CAMK1	chr3	-	9766124	9766213	9765758	9765890	9767666	9767781	19323	3,6,0,0,3,3,1,5,0,0,2,3,2,6,1,2,1,1,2,1,2,2,0,0,6,5,0,0,2,0,5,1,1,0,3,2,4,2,4,0,0,0,0,0,0,1,6,1,3,1,0,1,0,1,0,1,1,0,1,2,1,0,2,0,0,0,2,5,1,4,3,2,1,1,1,0,1,3,2,0,0,0,0,0,1,0,0,0,0,1,2,1,2,2,0,2,0,0,2,1,4,1,1,1,1,1,1,1,1,1,4,6,2,1,5,3,8,4,2,7,2,2,2,0,0,2,1,1,2,0,0,0,3,0,2,2,3,3,0,0,5,9,6,3,5,3,1,0,2,2,0,1,2,1,1,3,0,0,1,0,0,2,1,8,7,6,4,1,1,3,1,2,3,2,1,5,2,2,3,2,0,2,1,4,5,5,0,0,0,1,0,2,2,0,3,6,0,0,1,0	41,39,11,16,4,4,39,34,2,9,20,21,33,17,11,10,7,4,9,7,19,19,8,9,21,14,2,4,11,9,29,24,14,17,27,25,21,19,6,10,5,3,3,5,4,4,4,9,25,19,10,10,6,5,4,8,2,5,14,17,9,11,3,1,7,7,11,21,16,9,9,15,3,2,5,2,4,6,16,13,3,2,13,8,7,7,11,13,3,3,11,9,10,8,9,10,26,27,7,2,29,44,6,4,17,11,3,5,9,15,25,28,11,13,17,15,33,21,17,18,7,10,9,7,2,4,17,17,42,30,5,1,9,11,22,17,27,38,3,6,60,71,35,41,14,7,9,13,16,17,4,7,15,17,21,13,2,9…	4,0,0,2,4,4,8,3,4,10,2,1,8,6,3,2,6,6,2,0,3,4,1,4,7,6,0,2,0,1,3,9,2,0,0,1,10,14,6,4,2,2,2,1,5,3,2,4,3,7,1,2	11,4,13,18,28,24,96,81,14,16,22,18,17,22,18,21,40,43,11,13,44,21,10,7,32,19,7,10,25,11,25,16,27,27,8,8,35,33,40,49,17,19,49,40,25,30,6,5,30,39,14,11	100	50	2.22762e-07	2.42661e-05	0.035,0.071,0.0,0.0,0.273,0.273,0.013,0.068,0.0,0.0,0.048,0.067,0.029,0.15,0.043,0.091,0.067,0.111,0.1,0.067,0.05,0.05,0.0,0.0,0.125,0.152,0.0,0.0,0.083,0.0,0.079,0.02,0.034,0.0,0.053,0.038,0.087,0.05,0.25,0.0,0.0,0.0,0.0,0.0,0.0,0.111,0.429,0.053,0.057,0.026,0.0,0.048,0.0,0.091,0.0,0.059,0.2,0.0,0.034,0.056,0.053,0.0,0.25,0.0,0.0,0.0,0.083,0.106,0.03,0.182,0.143,0.062,0.143,0.2,0.091,0.0,0.111,0…	0.154,0.0,0.0,0.053,0.067,0.077,0.04,0.018,0.125,0.238,0.043,0.027,0.19,0.12,0.077,0.045,0.07,0.065,0.083,0.0,0.033,0.087,0.048,0.222,0.099,0.136,0.0,0.091,0.0,0.043,0.057,0.22,0.036,0.0,0.0,0.059,0.125,0.175,0.07,0.039,0.056,0.05,0.02,0.012,0.091,0.048,0.143,0.286,0.048,0.082,0.034,0.083	-0.015
19539	ENSG00000106400	ZNHIT1	chr7	+	101218318	101218485	101218165	101218217	101222603	101222774	19539	1,3,0,1,3,1,1,1,0,4,0,1,0,2,0,6,2,3,9,6,8,1,1,4,2,1,3,5,3,1,0,1,1,5,1,1,0,0,0,4,3,1,3,2,0,0,0,3,2,1,2,0,3,3,1,1,0,2,0,0,2,3,12,11,3,2,0,1,2,2,1,1,2,0,1,3,2,1,2,2,4,5,0,5,1,3,0,1,2,1,1,3,2,1,4,5,4,0,1,0,9,5,1,1,0,1,3,2,1,3,4,4,5,0,0,0,6,7,4,0,5,0,5,2,0,0,4,2,2,6,6,10,4,6,3,1,6,4,1,1,0,7,4,7,1,1,6,3,2,1,3,1,3,1,2,0,3,2,1,1,2,0,3,2,0,1,3,10,2,5,2,2,4,0,2,2,0,0,2,10,2,0,3,3,1,2,8,7,2,2,7,2,2,2,0,0,0,…	15,18,15,13,21,21,11,10,10,2,11,7,24,11,5,7,19,13,26,26,7,1,3,4,3,4,5,7,6,1,7,7,15,24,19,11,5,4,8,1,3,2,1,2,3,2,4,8,20,14,0,2,8,7,6,2,3,5,4,7,9,9,9,6,37,23,4,2,10,9,4,10,2,2,7,3,11,4,5,6,19,14,3,3,5,5,3,2,3,2,7,8,1,0,22,34,54,55,9,9,7,15,2,2,2,1,5,3,5,1,27,14,30,27,2,3,13,12,4,7,14,10,5,4,11,11,18,11,26,27,17,24,45,40,7,6,3,7,5,6,47,28,8,8,10,18,2,1,9,7,8,11,2,3,6,9,35,26,12,12,27,18,17,22,18,15,…	2,6,1,0,0,2,4,5,4,2,4,0,3,1,2,0,0,0,2,4,3,1,3,3,4,4,1,2,2,3,0,4,7,6,5,2,1,1,1,1,4,2,0,1,2,2,3,5,7,10,0,2	49,39,14,13,13,7,109,67,19,24,23,26,18,16,28,30,51,32,19,20,29,42,13,16,41,40,50,44,35,27,29,30,40,47,18,17,9,12,50,71,156,162,24,26,24,29,20,21,7,13,28,23	100	50	4.00705e-09	5.44183e-07	0.032,0.077,0.0,0.037,0.067,0.023,0.043,0.048,0.0,0.5,0.0,0.067,0.0,0.083,0.0,0.3,0.05,0.103,0.148,0.103,0.364,0.333,0.143,0.333,0.25,0.111,0.231,0.263,0.2,0.333,0.0,0.067,0.032,0.094,0.026,0.043,0.0,0.0,0.0,0.667,0.333,0.2,0.6,0.333,0.0,0.0,0.0,0.158,0.048,0.034,1.0,0.0,0.158,0.176,0.077,0.2,0.0,0.167,0.0,0.0,0.1,0.143,0.4,0.478,0.039,0.042,0.0,0.2,0.091,0.1,0.111,0.048,0.333,0.0,0.067,0.333,0.0…	0.02,0.071,0.034,0.0,0.0,0.125,0.018,0.036,0.095,0.04,0.08,0.0,0.077,0.03,0.034,0.0,0.0,0.0,0.05,0.091,0.049,0.012,0.103,0.086,0.047,0.048,0.01,0.022,0.028,0.053,0.0,0.062,0.08,0.06,0.122,0.056,0.053,0.04,0.01,0.007,0.013,0.006,0.0,0.019,0.04,0.033,0.07,0.106,0.333,0.278,0.0,0.042	0.083
19638	ENSG00000135930	EIF4E2	chr2	+	232557883	232558018	232556415	232556530	232564246	232564351	19638	135,137,64,88,81,75,187,152,84,99,112,126,126,127,114,98,99,114,116,104,147,139,93,101,140,132,72,74,77,81,178,164,91,98,142,161,148,161,91,94,86,113,84,87,116,116,92,101,112,125,70,87,113,93,74,71,87,79,118,103,71,69,65,68,113,106,112,126,197,205,101,105,47,59,60,47,77,77,67,82,93,81,106,107,72,80,108,121,111,99,114,115,103,116,84,68,111,102,32,39,176,187,62,51,81,88,74,89,72,61,164,132,119,103,…	9,6,2,4,1,2,7,8,6,2,5,3,6,3,3,6,1,7,2,0,2,3,4,1,5,7,1,2,2,8,7,3,5,0,7,7,4,6,2,3,3,2,0,2,7,3,2,5,5,4,0,4,1,6,0,0,4,3,6,4,5,2,17,15,7,4,3,5,11,2,1,1,3,1,2,1,5,3,4,8,0,6,3,5,0,1,3,3,6,0,5,1,0,8,4,5,1,0,2,3,3,5,0,3,3,3,3,3,8,3,4,5,5,6,4,6,7,9,7,7,4,1,4,5,5,6,3,6,4,7,3,2,2,11,3,3,3,3,3,0,4,7,4,2,1,2,2,1,5,7,3,3,2,2,2,9,1,2,3,2,2,1,3,2,2,4,2,4,7,5,2,4,3,3,1,3,2,2,8,7,2,1,1,4,0,0,0,4,2,2,3,0,8,7,11,0,3,…	81,76,102,122,113,92,214,215,107,107,105,73,123,93,135,166,160,170,110,111,140,144,63,72,112,113,122,127,119,136,158,146,114,125,93,73,101,109,57,71,94,85,130,135,79,74,53,54,111,92,111,111	4,4,4,1,2,3,10,7,5,6,2,0,3,2,3,8,8,6,3,4,9,2,2,1,10,9,2,7,3,5,6,4,8,10,1,3,5,4,2,1,1,2,7,4,2,0,0,0,7,2,5,3	100	50	1.37255e-05	0.00109054	0.882,0.919,0.941,0.917,0.976,0.949,0.93,0.905,0.875,0.961,0.918,0.955,0.913,0.955,0.95,0.891,0.98,0.891,0.967,1.0,0.974,0.959,0.921,0.981,0.933,0.904,0.973,0.949,0.951,0.835,0.927,0.965,0.901,1.0,0.91,0.92,0.949,0.931,0.958,0.94,0.935,0.966,1.0,0.956,0.892,0.951,0.958,0.91,0.918,0.94,1.0,0.916,0.983,0.886,1.0,1.0,0.916,0.929,0.908,0.928,0.877,0.945,0.657,0.694,0.89,0.93,0.949,0.926,0.9,0.981,0.9…	0.91,0.905,0.927,0.984,0.966,0.939,0.915,0.939,0.915,0.899,0.963,1.0,0.953,0.959,0.957,0.912,0.909,0.934,0.948,0.933,0.886,0.973,0.94,0.973,0.848,0.863,0.968,0.901,0.952,0.932,0.929,0.948,0.877,0.862,0.979,0.924,0.91,0.932,0.934,0.973,0.979,0.955,0.903,0.944,0.952,1.0,1.0,1.0,0.888,0.958,0.917,0.949	-0.002
19999	ENSG00000018280	SLC11A1	chr2	+	218382959	218383102	218382168	218382375	218384242	218384365	19999	373,427,247,263,237,227,195,219,238,224,275,273,152,138,347,326,484,529,765,758,143,138,314,326,101,112,668,677,444,419,225,218,299,303,369,322,262,299,831,823,546,619,452,411,303,273,950,851,199,211,402,394,382,407,563,583,305,266,456,464,194,215,413,386,340,326,303,248,550,492,271,237,151,122,231,245,167,159,735,706,640,613,481,447,202,189,225,184,167,166,96,91,134,119,201,185,66,52,22,39,326,2…	5,7,18,7,8,4,16,14,8,8,11,9,4,4,5,4,11,18,55,60,6,10,9,9,4,2,30,35,12,10,9,9,19,10,9,7,5,4,36,36,28,29,16,14,9,10,35,50,2,4,16,8,9,14,26,13,15,14,26,25,18,12,33,32,8,4,10,11,23,31,5,9,8,8,5,3,11,12,27,18,47,38,17,19,3,14,10,10,6,8,7,7,2,3,5,6,1,2,0,2,17,22,5,3,4,2,29,32,15,13,7,6,0,0,17,12,8,7,2,7,15,1,3,8,5,14,9,14,8,4,10,11,7,4,2,0,2,4,16,21,3,0,4,2,24,11,6,5,14,7,11,17,10,5,7,9,6,5,19,12,5,1,2…	472,443,643,711,171,123,260,262,436,445,631,665,198,181,574,575,383,388,354,356,925,985,829,774,94,98,539,477,602,573,479,460,730,688,967,1024,68,47,98,75,152,163,230,222,22,8,123,125,59,61,760,751	13,10,27,14,1,3,5,1,16,17,18,15,5,4,15,13,4,1,8,4,24,20,18,22,5,2,18,18,12,13,11,16,57,57,47,37,1,0,3,3,7,3,6,14,0,0,2,2,2,1,13,22	100	50	2.27212e-07	2.46637e-05	0.974,0.968,0.873,0.949,0.937,0.966,0.859,0.887,0.937,0.933,0.926,0.938,0.95,0.945,0.972,0.976,0.957,0.936,0.874,0.863,0.923,0.873,0.946,0.948,0.927,0.966,0.918,0.906,0.949,0.954,0.926,0.924,0.887,0.938,0.953,0.958,0.963,0.974,0.92,0.92,0.907,0.914,0.934,0.936,0.944,0.932,0.931,0.895,0.98,0.963,0.926,0.961,0.955,0.936,0.915,0.957,0.91,0.905,0.898,0.903,0.843,0.9,0.862,0.858,0.955,0.976,0.938,0.91…	0.948,0.957,0.923,0.962,0.988,0.953,0.963,0.992,0.932,0.929,0.946,0.957,0.952,0.958,0.95,0.957,0.98,0.995,0.957,0.978,0.951,0.961,0.958,0.946,0.904,0.961,0.937,0.93,0.962,0.957,0.956,0.935,0.865,0.858,0.911,0.933,0.971,1.0,0.942,0.926,0.916,0.964,0.95,0.888,1.0,1.0,0.969,0.969,0.937,0.968,0.967,0.945	-0.019
20030	ENSG00000163466	ARPC2	chr2	+	218217371	218217544	218217140	218217254	218225919	218225954	20030	363,409,268,252,373,377,375,324,365,390,313,313,277,282,376,420,356,368,516,488,358,358,409,375,386,386,454,427,359,369,416,443,371,388,412,437,445,426,466,493,503,471,404,391,361,350,416,420,431,425,357,315,466,464,411,394,264,260,372,402,307,329,300,309,340,323,344,404,664,736,254,250,219,187,190,194,254,225,329,345,366,383,393,405,288,288,397,374,481,412,302,261,307,316,164,151,95,95,122,107,3…	17,15,14,21,17,22,14,12,14,16,5,7,10,11,15,22,16,17,19,15,6,4,26,17,12,12,14,14,26,24,14,17,9,5,10,19,10,6,8,18,18,10,12,11,15,14,11,8,8,7,8,15,23,19,12,16,7,7,7,8,6,7,8,6,20,8,9,13,19,31,7,13,6,1,5,7,3,3,8,12,12,7,9,10,15,15,16,12,27,40,9,13,20,20,3,5,2,2,1,0,8,12,6,13,12,9,6,3,14,9,15,6,0,0,10,7,4,6,3,14,3,17,15,10,19,27,11,8,6,9,8,6,2,5,9,2,11,11,7,7,1,3,6,14,8,12,14,13,6,4,10,13,28,13,5,14,14…	225,274,383,409,157,160,331,276,385,391,377,324,273,305,560,483,486,484,563,498,565,511,538,492,340,339,372,400,481,479,480,465,536,557,366,358,101,98,89,80,163,165,323,340,21,14,189,207,97,109,431,408	2,4,9,9,4,4,2,1,7,4,10,9,13,9,20,8,8,10,11,13,16,19,16,19,3,6,4,7,12,19,12,13,4,10,15,17,1,1,0,5,1,1,10,12,1,0,1,1,4,4,9,9	100	50	1.52027e-11	2.80641e-09	0.914,0.932,0.905,0.857,0.916,0.895,0.931,0.931,0.929,0.924,0.969,0.957,0.933,0.928,0.926,0.905,0.918,0.915,0.931,0.942,0.968,0.978,0.887,0.917,0.941,0.941,0.942,0.938,0.873,0.885,0.937,0.929,0.954,0.975,0.954,0.92,0.957,0.973,0.967,0.932,0.933,0.959,0.944,0.947,0.923,0.926,0.95,0.963,0.964,0.968,0.957,0.913,0.91,0.924,0.945,0.925,0.95,0.949,0.964,0.962,0.962,0.959,0.949,0.963,0.895,0.953,0.95,0.…	0.983,0.972,0.955,0.958,0.952,0.952,0.988,0.993,0.965,0.98,0.95,0.947,0.913,0.944,0.933,0.968,0.968,0.96,0.962,0.95,0.946,0.931,0.944,0.928,0.983,0.966,0.979,0.966,0.952,0.926,0.952,0.947,0.985,0.965,0.924,0.913,0.981,0.98,1.0,0.889,0.988,0.988,0.942,0.934,0.913,1.0,0.99,0.99,0.924,0.932,0.96,0.958	-0.019
20116	ENSG00000106348	IMPDH1	chr7	-	128393721	128393738	128392276	128393028	128394277	128394361	20116	1,4,0,2,0,0,3,3,17,14,3,4,1,2,9,10,4,4,7,8,1,1,6,1,2,4,5,4,2,3,0,3,3,4,3,3,6,8,6,2,5,7,3,8,4,8,9,7,7,6,5,3,7,5,8,9,4,9,2,9,1,3,5,3,0,3,3,7,6,2,3,0,2,0,2,5,8,7,8,3,16,13,4,3,8,6,4,4,3,6,9,4,5,4,11,5,5,7,2,2,3,1,1,3,5,2,16,12,5,2,2,1,5,7,4,6,4,5,2,1,1,0,2,1,5,4,2,3,3,1,8,6,6,3,1,2,2,1,11,2,2,7,1,1,2,2,0,2,7,3,9,1,10,5,8,7,5,5,4,9,1,2,1,1,11,12,2,1,6,6,4,5,8,2,6,12,1,2,4,5,5,8,2,6,7,10,3,6,10,8,16,2…	113,132,85,102,197,158,93,69,162,158,134,128,80,68,133,129,145,161,196,172,72,84,144,137,96,92,159,134,179,173,110,100,113,130,182,160,99,103,189,176,211,165,108,91,214,185,193,205,138,187,165,149,183,162,212,215,231,247,150,149,74,70,84,82,157,121,103,108,264,221,96,87,64,86,151,150,157,151,93,104,290,295,171,180,268,280,131,128,161,169,174,220,116,109,195,216,209,213,45,56,193,171,61,63,67,44,1…	16,20,7,11,15,13,9,1,7,11,20,12,9,5,4,10,9,13,13,10,12,11,14,12,8,6,9,13,10,4,9,8,15,11,19,12,8,9,21,17,15,14,15,4,7,8,1,2,5,7,13,15	305,316,202,214,331,321,193,157,181,210,405,337,89,94,133,177,224,212,213,224,324,293,266,249,165,150,314,326,217,181,326,352,340,336,281,273,175,210,239,269,280,278,194,187,154,191,290,273,245,232,320,285	67	50	4.76476e-11	8.20603e-09	0.007,0.022,0.0,0.014,0.0,0.0,0.024,0.031,0.073,0.062,0.016,0.023,0.009,0.021,0.048,0.055,0.02,0.018,0.026,0.034,0.01,0.009,0.03,0.005,0.015,0.031,0.023,0.022,0.008,0.013,0.0,0.022,0.019,0.022,0.012,0.014,0.043,0.055,0.023,0.008,0.017,0.031,0.02,0.062,0.014,0.031,0.034,0.025,0.036,0.023,0.022,0.015,0.028,0.023,0.027,0.03,0.013,0.026,0.01,0.043,0.01,0.031,0.043,0.027,0.0,0.018,0.021,0.046,0.017,0.…	0.038,0.045,0.025,0.037,0.033,0.029,0.034,0.005,0.028,0.038,0.036,0.026,0.07,0.038,0.022,0.04,0.029,0.044,0.044,0.032,0.027,0.027,0.038,0.035,0.035,0.029,0.021,0.029,0.033,0.016,0.02,0.017,0.032,0.024,0.048,0.032,0.033,0.031,0.062,0.045,0.038,0.036,0.055,0.016,0.033,0.03,0.003,0.005,0.015,0.022,0.029,0.038	-0.008
20214	ENSG00000198814	GK	chrX	+	30668011	30668118	30665510	30665584	30677374	30677452	20214	59,80,37,50,108,84,55,72,375,411,48,41,33,38,49,52,70,65,52,44,45,44,53,42,82,92,157,158,74,76,64,53,69,52,81,62,54,61,71,54,168,172,51,64,125,150,70,75,52,47,54,39,90,117,93,90,54,59,69,97,178,135,45,31,38,56,90,94,186,170,41,36,39,51,73,82,55,56,95,98,100,84,107,97,36,42,81,83,151,168,44,38,67,87,11,12,3,7,15,9,39,38,23,18,111,98,106,89,135,97,49,65,1,2,111,101,29,41,67,64,30,28,82,77,66,70,106…	3,0,3,3,7,5,3,1,33,27,1,0,6,0,2,3,6,6,2,1,0,5,4,7,5,1,5,3,6,5,2,1,2,3,4,8,2,5,4,6,4,4,5,3,4,5,3,5,5,3,7,5,9,15,11,3,1,3,5,3,7,7,1,0,2,5,8,6,8,11,3,3,1,3,5,3,0,2,6,6,5,0,11,8,6,0,7,4,9,13,1,3,3,2,0,0,2,2,0,0,1,1,2,1,7,13,1,1,18,14,5,2,0,0,5,4,2,3,8,4,2,0,14,2,4,2,11,8,3,0,2,0,0,1,3,3,2,4,0,3,2,1,3,2,6,3,2,5,2,2,2,1,6,11,1,0,6,3,3,3,2,4,1,4,1,0,0,2,4,1,4,7,3,2,2,0,8,2,1,1,1,0,2,0,0,0,6,2,0,0,1,1,1,…	24,25,106,96,29,24,6,13,75,50,41,64,52,41,113,125,73,75,196,180,85,90,129,137,25,42,33,42,80,70,43,44,77,71,72,89,6,6,7,8,20,19,29,32,1,3,32,23,6,12,48,39	2,1,5,4,0,0,0,0,5,4,4,4,0,3,6,5,5,4,1,2,5,2,3,0,0,1,0,0,8,8,6,1,1,3,4,8,1,1,0,0,0,0,2,2,0,0,0,1,0,0,2,3	100	50	0.000215705	0.0137676	0.908,1.0,0.86,0.893,0.885,0.894,0.902,0.973,0.85,0.884,0.96,1.0,0.733,1.0,0.925,0.897,0.854,0.844,0.929,0.957,1.0,0.815,0.869,0.75,0.891,0.979,0.94,0.963,0.86,0.884,0.941,0.964,0.945,0.897,0.91,0.795,0.931,0.859,0.899,0.818,0.955,0.956,0.836,0.914,0.94,0.938,0.921,0.882,0.839,0.887,0.794,0.796,0.833,0.796,0.809,0.938,0.964,0.908,0.873,0.942,0.927,0.906,0.957,1.0,0.905,0.848,0.849,0.887,0.921,0.8…	0.857,0.926,0.914,0.923,1.0,1.0,1.0,1.0,0.882,0.862,0.837,0.889,1.0,0.872,0.904,0.926,0.88,0.904,0.99,0.978,0.895,0.957,0.956,1.0,1.0,0.955,1.0,1.0,0.833,0.814,0.782,0.957,0.975,0.922,0.9,0.848,0.75,0.75,1.0,1.0,1.0,1.0,0.879,0.889,1.0,1.0,1.0,0.92,1.0,1.0,0.923,0.867	-0.034
20545	ENSG00000115415	STAT1	chr2	-	190975309	190975434	190974829	190974932	190975811	190975887	20545	19,15,4,9,80,58,3,11,41,35,7,10,8,9,6,2,7,7,9,19,5,3,9,8,18,15,18,19,7,2,12,6,13,12,7,5,7,7,8,18,9,20,18,17,12,15,4,7,9,6,8,4,17,16,7,9,4,2,4,1,23,17,3,0,10,13,8,12,19,19,11,8,2,1,16,19,6,5,20,11,6,2,7,10,2,1,6,6,18,8,6,1,7,5,4,0,9,2,0,0,6,7,5,6,15,16,24,27,18,23,0,5,0,2,9,11,2,2,16,14,24,21,22,18,18,21,14,13,10,4,0,2,2,3,13,10,27,31,10,16,6,10,23,20,6,14,18,15,2,3,24,30,10,11,3,7,27,33,11,9,8,10…	226,258,50,46,259,247,64,66,218,224,63,49,61,68,49,43,44,57,74,63,76,74,76,64,172,157,158,177,23,40,112,88,50,55,69,66,80,71,93,82,96,82,49,70,51,22,51,41,76,67,70,72,107,88,71,60,25,17,30,33,154,128,19,9,121,90,59,53,144,132,48,52,37,33,64,78,36,43,132,114,38,45,82,72,20,24,62,53,65,42,20,17,44,56,19,24,11,11,3,6,72,67,98,90,173,153,119,125,116,119,51,57,7,5,95,103,68,54,166,160,183,160,156,160,…	8,4,6,7,16,1,4,1,3,5,5,5,12,25,5,4,18,15,3,6,4,2,2,2,5,9,1,0,7,15,6,4,1,1,8,6,0,0,2,0,4,6,2,7,1,0,0,0,1,1,2,3	31,31,74,45,34,48,60,73,52,42,32,38,153,162,20,34,126,139,108,111,30,36,32,35,73,76,20,13,66,53,23,36,11,11,32,39,9,13,5,8,65,75,47,40,3,7,2,5,6,12,30,20	100	50	8.92435e-06	0.000747608	0.04,0.028,0.038,0.089,0.134,0.105,0.023,0.077,0.086,0.072,0.053,0.093,0.062,0.062,0.058,0.023,0.074,0.058,0.057,0.131,0.032,0.02,0.056,0.059,0.05,0.046,0.054,0.051,0.132,0.024,0.051,0.033,0.115,0.098,0.048,0.036,0.042,0.047,0.041,0.099,0.045,0.109,0.155,0.108,0.105,0.254,0.038,0.079,0.056,0.043,0.054,0.027,0.074,0.083,0.047,0.07,0.074,0.056,0.062,0.015,0.069,0.062,0.073,0.0,0.04,0.067,0.063,0.10…	0.114,0.061,0.039,0.072,0.19,0.01,0.032,0.007,0.028,0.056,0.072,0.062,0.038,0.072,0.111,0.056,0.067,0.051,0.014,0.026,0.062,0.027,0.03,0.028,0.033,0.056,0.024,0.0,0.05,0.124,0.115,0.053,0.043,0.043,0.111,0.071,0.0,0.0,0.167,0.0,0.03,0.038,0.021,0.08,0.143,0.0,0.0,0.0,0.077,0.04,0.032,0.07	0.014
20872	ENSG00000205981	DNAJC19	chr3	-	180986942	180987022	180985409	180985996	180988022	180988096	20872	23,28,20,22,20,9,36,41,14,16,33,32,51,38,10,19,25,25,39,40,74,58,28,20,47,63,14,13,8,15,30,47,38,31,28,23,50,24,16,12,17,19,20,9,21,18,8,13,65,48,12,19,25,19,17,17,13,17,27,27,24,15,2,3,33,27,28,26,57,50,13,17,17,15,12,12,14,25,11,9,13,8,19,13,18,7,27,17,26,14,23,27,24,16,8,12,20,15,22,22,41,24,12,10,23,21,3,16,15,21,45,48,32,39,49,33,56,76,64,49,41,36,22,35,10,7,23,28,37,48,55,51,28,29,26,33,36,…	10,10,6,4,2,1,6,12,5,3,7,9,3,7,4,5,4,2,6,6,16,11,4,2,3,3,4,3,0,2,10,15,6,5,5,7,13,5,4,3,6,6,5,4,5,1,3,4,13,6,1,1,8,8,5,1,5,4,7,8,5,2,12,7,5,3,9,4,10,7,2,3,0,0,5,3,9,6,3,0,6,4,2,5,2,4,4,1,0,2,6,7,1,1,5,4,7,9,8,8,11,10,0,0,4,3,3,8,3,3,14,16,10,8,13,10,17,23,3,7,13,13,1,5,6,0,3,8,9,10,3,5,2,3,5,8,4,5,3,5,5,11,4,6,4,3,6,1,8,5,6,2,1,4,4,3,1,0,7,1,2,3,8,6,2,7,9,4,14,4,1,5,12,6,7,7,3,4,15,11,10,18,3,0,1…	15,12,19,23,23,27,49,64,20,31,27,22,55,44,34,42,41,34,14,15,19,32,8,12,48,49,32,30,34,33,18,33,11,20,16,11,30,33,26,42,37,32,38,43,27,38,13,22,45,41,37,37	9,4,3,7,9,7,15,19,6,10,6,9,8,11,3,4,6,3,2,1,7,10,4,3,11,10,9,7,3,5,10,5,12,13,1,7,7,7,12,8,13,6,14,15,12,17,7,6,16,12,10,4	100	50	0.000185945	0.0120935	0.535,0.583,0.625,0.733,0.833,0.818,0.75,0.631,0.583,0.727,0.702,0.64,0.895,0.731,0.556,0.655,0.758,0.862,0.765,0.769,0.698,0.725,0.778,0.833,0.887,0.913,0.636,0.684,1.0,0.789,0.6,0.61,0.76,0.756,0.737,0.622,0.658,0.706,0.667,0.667,0.586,0.613,0.667,0.529,0.677,0.9,0.571,0.619,0.714,0.8,0.857,0.905,0.61,0.543,0.63,0.895,0.565,0.68,0.659,0.628,0.706,0.789,0.077,0.176,0.767,0.818,0.609,0.765,0.74,0…	0.455,0.6,0.76,0.622,0.561,0.659,0.62,0.627,0.625,0.608,0.692,0.55,0.775,0.667,0.85,0.84,0.774,0.85,0.778,0.882,0.576,0.615,0.5,0.667,0.686,0.71,0.64,0.682,0.85,0.767,0.474,0.767,0.314,0.435,0.889,0.44,0.682,0.702,0.52,0.724,0.587,0.727,0.576,0.589,0.529,0.528,0.481,0.647,0.584,0.631,0.649,0.822	0.069
21264	ENSG00000184922	FMNL1	chr17	+	45234831	45234849	45234071	45234200	45236135	45236244	21264	19,23,14,10,8,14,37,35,26,25,27,21,24,25,14,21,24,21,20,20,15,17,14,27,15,6,22,16,26,16,21,13,26,20,24,30,16,23,24,21,17,14,6,2,18,10,29,21,35,25,12,10,20,20,14,18,6,10,14,10,17,22,13,8,15,23,25,14,20,18,10,10,9,5,9,6,6,6,16,10,38,26,12,6,10,13,13,8,12,10,14,16,16,13,8,10,4,3,1,3,23,25,2,3,12,12,28,18,19,26,22,22,2,1,29,41,11,8,12,9,4,4,10,16,21,22,32,28,12,12,11,12,8,1,15,11,11,8,14,11,6,8,21,25…	218,237,136,129,202,194,154,140,116,125,118,108,118,126,120,151,184,193,180,192,86,99,128,107,74,78,151,145,163,143,151,127,141,147,190,182,97,101,256,189,122,127,42,37,110,99,165,171,173,137,162,140,197,169,142,136,59,48,65,71,93,103,105,122,179,193,117,137,280,261,84,75,66,60,87,76,44,46,168,146,169,177,108,122,73,62,77,69,76,84,76,84,83,104,66,81,31,37,12,10,165,163,83,67,68,77,102,91,206,179,…	13,13,50,27,14,7,12,14,37,40,16,18,34,37,47,37,24,36,48,37,44,32,29,46,15,17,19,13,45,23,23,23,26,19,38,22,10,6,5,6,9,13,28,35,2,3,11,15,4,3,24,18	68,71,174,179,42,39,94,73,154,143,109,145,182,134,129,121,156,165,160,142,183,162,150,179,108,115,137,112,206,174,139,145,173,160,159,157,32,29,39,32,80,83,130,134,8,6,49,31,27,31,141,114	68	50	0	0	0.06,0.067,0.07,0.054,0.028,0.05,0.15,0.155,0.141,0.128,0.144,0.125,0.13,0.127,0.079,0.093,0.088,0.074,0.076,0.071,0.114,0.112,0.074,0.157,0.13,0.054,0.097,0.075,0.105,0.076,0.093,0.07,0.119,0.091,0.085,0.108,0.108,0.143,0.064,0.076,0.093,0.075,0.095,0.038,0.107,0.069,0.114,0.083,0.129,0.118,0.052,0.05,0.069,0.08,0.068,0.089,0.07,0.133,0.137,0.094,0.118,0.136,0.083,0.046,0.058,0.081,0.136,0.07,0.…	0.123,0.119,0.174,0.1,0.197,0.117,0.086,0.124,0.15,0.171,0.097,0.084,0.121,0.169,0.211,0.184,0.102,0.138,0.181,0.161,0.15,0.127,0.124,0.159,0.093,0.098,0.093,0.079,0.138,0.089,0.108,0.104,0.1,0.08,0.149,0.093,0.187,0.132,0.086,0.121,0.076,0.103,0.137,0.161,0.155,0.269,0.142,0.262,0.098,0.066,0.111,0.104	-0.041
21509	ENSG00000124588	NQO2	chr6	+	3006815	3006935	3006467	3006559	3010024	3010189	21509	13,18,7,10,18,13,12,1,16,16,11,8,6,7,17,6,21,40,35,30,13,13,12,20,7,16,43,37,31,44,19,10,8,6,21,26,9,11,23,14,40,31,24,28,39,29,24,35,19,15,36,13,24,35,33,33,29,23,53,30,22,17,22,33,17,16,11,7,37,22,11,15,15,14,20,22,24,23,28,25,31,38,32,35,26,35,24,19,38,37,20,12,38,24,44,37,18,16,8,11,8,17,10,9,13,7,35,16,15,18,12,11,11,8,17,10,13,7,15,8,11,11,23,16,26,23,33,26,11,10,22,27,16,9,16,13,25,16,19,1…	24,25,37,46,33,23,28,33,77,75,47,32,32,47,154,175,78,87,113,79,31,33,69,60,53,54,132,125,150,128,37,46,74,69,39,42,103,101,81,65,235,253,133,155,154,156,59,79,138,132,101,88,162,143,194,188,76,77,73,88,56,67,90,77,55,44,66,63,90,84,43,67,65,73,58,66,146,124,158,162,219,202,239,214,90,65,70,84,271,313,100,134,63,88,133,128,114,102,82,59,112,143,38,34,28,28,114,119,68,53,17,16,42,49,71,59,56,43,67,…	7,19,18,22,7,8,4,2,21,33,12,9,10,7,10,3,6,4,12,17,7,10,16,22,2,5,7,12,15,30,13,25,27,14,20,15,10,9,12,7,8,12,11,15,4,7,21,19,5,10,18,22	37,28,153,121,95,119,20,31,126,150,62,58,78,71,45,37,163,163,135,145,291,328,56,65,54,52,92,93,123,112,106,128,274,252,215,182,89,99,43,48,64,55,38,49,29,30,46,37,67,83,171,183	100	50	0	0	0.213,0.265,0.086,0.098,0.214,0.22,0.176,0.015,0.094,0.096,0.105,0.111,0.086,0.069,0.052,0.017,0.119,0.187,0.134,0.16,0.173,0.165,0.08,0.143,0.062,0.129,0.14,0.129,0.094,0.147,0.204,0.098,0.051,0.042,0.212,0.236,0.042,0.052,0.124,0.097,0.078,0.058,0.083,0.083,0.112,0.085,0.169,0.181,0.064,0.054,0.151,0.069,0.069,0.109,0.078,0.081,0.16,0.13,0.266,0.146,0.164,0.113,0.109,0.176,0.134,0.154,0.077,0.0…	0.086,0.253,0.056,0.083,0.036,0.033,0.091,0.031,0.077,0.099,0.088,0.072,0.06,0.047,0.1,0.039,0.018,0.012,0.043,0.055,0.012,0.015,0.125,0.145,0.018,0.046,0.037,0.061,0.057,0.118,0.058,0.089,0.047,0.027,0.044,0.04,0.053,0.043,0.122,0.068,0.059,0.098,0.126,0.133,0.065,0.104,0.186,0.204,0.036,0.057,0.05,0.057	0.035
21583	ENSG00000123609	NMI	chr2	-	151288890	151289077	151282867	151282954	151289592	151289894	21583	13,12,3,10,26,19,4,4,30,25,1,2,4,2,4,7,8,10,12,24,8,4,23,15,12,13,18,8,11,7,4,1,4,6,8,4,7,5,12,7,13,10,5,5,6,15,9,8,2,2,4,21,27,12,13,10,4,5,1,4,16,17,2,3,18,10,6,7,23,20,6,16,2,4,11,8,1,2,21,19,2,7,4,6,6,8,14,2,10,12,5,0,15,19,0,3,3,2,0,0,1,0,10,10,7,3,3,8,16,4,7,15,0,0,7,4,4,1,11,18,14,16,19,25,10,13,20,15,2,3,3,12,2,0,8,4,17,9,4,3,2,5,19,16,10,8,12,14,1,5,21,15,8,6,6,2,15,26,3,3,7,13,7,6,4,9,6…	184,206,46,74,214,174,71,96,240,241,67,77,60,54,92,81,84,81,105,101,64,67,84,81,112,99,93,121,64,50,72,55,86,86,90,89,83,63,95,96,103,96,47,53,92,93,86,98,79,73,87,100,119,148,127,127,35,61,83,70,134,161,45,48,121,125,85,60,182,193,64,53,45,39,89,105,51,48,116,105,98,95,91,117,55,52,64,50,142,132,47,45,91,88,44,47,24,23,10,5,79,88,85,71,120,98,125,118,112,136,85,89,9,3,117,105,48,54,103,105,95,11…	5,6,10,9,0,4,2,7,4,1,12,12,5,8,4,4,16,7,13,16,3,12,12,8,3,5,1,3,11,13,7,6,9,6,2,6,0,0,5,0,5,6,3,2,0,0,2,1,1,1,7,6	55,52,98,123,43,44,49,41,68,82,69,63,113,113,131,118,142,155,148,160,98,104,131,114,61,53,64,69,99,100,83,89,88,73,122,113,18,25,15,15,69,65,62,60,8,2,14,18,7,9,97,108	100	50	5.12623e-07	5.23283e-05	0.034,0.028,0.032,0.063,0.057,0.052,0.027,0.02,0.059,0.049,0.007,0.013,0.032,0.018,0.021,0.041,0.045,0.058,0.054,0.106,0.059,0.029,0.12,0.085,0.051,0.062,0.088,0.032,0.079,0.065,0.027,0.009,0.023,0.034,0.043,0.022,0.04,0.038,0.059,0.035,0.059,0.05,0.051,0.045,0.032,0.075,0.05,0.039,0.012,0.014,0.022,0.095,0.102,0.039,0.049,0.038,0.054,0.039,0.006,0.028,0.056,0.05,0.022,0.03,0.069,0.038,0.034,0.05…	0.043,0.055,0.049,0.035,0.0,0.043,0.02,0.079,0.029,0.006,0.08,0.087,0.022,0.034,0.015,0.017,0.053,0.022,0.042,0.048,0.015,0.055,0.044,0.034,0.024,0.045,0.008,0.021,0.053,0.061,0.04,0.033,0.049,0.039,0.008,0.026,0.0,0.0,0.143,0.0,0.035,0.044,0.024,0.016,0.0,0.0,0.067,0.027,0.067,0.053,0.035,0.027	0.009
22095	ENSG00000144118	RALB	chr2	+	120280834	120280907	120278617	120278778	120285873	120286082	22095	9,5,10,5,9,7,17,8,26,31,6,6,2,1,3,9,6,5,15,13,16,9,16,13,10,9,23,29,12,12,7,5,10,4,13,7,3,6,11,8,19,17,10,5,5,7,8,7,1,3,13,10,14,14,13,20,7,7,20,15,12,16,76,83,8,2,14,11,10,10,3,3,6,6,12,8,7,6,19,14,12,8,2,7,15,8,3,6,12,23,14,8,10,10,4,4,0,0,0,2,3,4,4,3,4,6,11,16,29,30,6,5,0,0,13,13,3,10,6,4,11,2,14,10,7,6,8,5,0,1,5,0,0,0,2,4,5,6,7,3,4,3,9,6,3,2,9,5,6,3,3,1,12,20,3,10,2,2,3,5,7,3,3,5,0,1,0,4,1,2,…	115,104,83,64,150,137,69,76,216,234,52,66,74,70,205,192,125,140,168,191,53,72,154,134,88,89,208,195,226,204,92,95,109,106,123,118,107,118,241,193,278,317,156,176,163,156,221,216,90,124,114,138,154,158,284,302,88,84,150,153,163,160,69,86,66,77,86,119,302,334,91,77,88,73,80,69,94,101,197,173,163,176,156,134,81,61,119,119,166,154,62,66,119,109,22,28,11,11,7,10,112,88,47,52,115,105,191,209,120,116,83…	1,1,13,16,0,2,1,1,4,6,8,5,8,11,10,2,7,5,1,5,1,5,13,8,2,1,2,1,4,13,9,12,6,2,15,10,0,1,0,1,3,0,6,5,0,0,0,0,0,0,8,7	81,79,183,145,25,33,29,14,106,121,139,126,87,81,182,205,163,156,236,221,191,193,330,343,54,55,103,123,202,188,145,142,142,152,213,169,8,6,9,9,38,45,95,71,2,3,18,16,17,14,135,146	100	50	0	0	0.038,0.023,0.057,0.038,0.029,0.025,0.11,0.05,0.057,0.062,0.055,0.043,0.013,0.007,0.007,0.023,0.023,0.018,0.043,0.033,0.131,0.059,0.049,0.046,0.054,0.048,0.052,0.069,0.026,0.029,0.037,0.026,0.044,0.019,0.05,0.029,0.014,0.025,0.022,0.02,0.033,0.026,0.031,0.014,0.015,0.022,0.018,0.016,0.006,0.012,0.054,0.035,0.043,0.042,0.022,0.032,0.038,0.04,0.062,0.047,0.036,0.048,0.355,0.325,0.057,0.013,0.075,0.…	0.006,0.006,0.034,0.052,0.0,0.029,0.017,0.034,0.019,0.024,0.028,0.019,0.044,0.064,0.027,0.005,0.021,0.016,0.002,0.011,0.003,0.013,0.019,0.012,0.018,0.009,0.01,0.004,0.01,0.033,0.03,0.041,0.021,0.007,0.034,0.029,0.0,0.077,0.0,0.053,0.038,0.0,0.031,0.034,0.0,0.0,0.0,0.0,0.0,0.0,0.029,0.023	0.016
22098	ENSG00000061938	TNK2	chr3	-	195869496	195869541	195867360	195868709	195870113	195870168	22098	18,20,12,4,4,7,5,3,4,3,7,13,4,6,6,2,5,1,18,18,5,5,3,2,2,0,8,6,2,1,6,4,7,12,8,9,8,7,11,3,1,3,2,4,3,3,7,7,6,8,2,4,1,3,6,8,4,12,4,7,3,2,10,6,6,4,7,3,7,6,5,4,6,9,3,2,5,9,11,6,12,12,4,2,0,2,0,1,2,3,2,5,0,1,8,14,4,1,0,2,10,6,2,3,0,1,7,8,9,17,8,5,9,12,11,13,6,7,2,6,4,5,4,6,3,5,7,6,9,5,4,11,2,2,6,4,7,4,5,8,3,1,12,7,10,6,7,5,6,2,2,3,9,0,8,9,10,9,2,5,4,1,11,6,3,5,1,3,5,6,8,3,13,8,5,9,4,6,14,7,6,12,6,3,1,1,…	53,39,16,15,25,27,18,20,10,13,11,14,22,31,22,14,28,21,41,42,18,23,15,21,15,15,16,14,16,27,26,12,15,22,23,29,13,13,35,16,14,15,12,9,17,18,20,20,34,22,18,22,22,33,17,17,17,9,9,6,14,16,25,17,33,35,15,14,26,27,12,11,16,11,12,14,9,8,16,10,24,18,18,14,17,18,16,11,15,17,20,24,10,10,19,21,22,22,9,2,11,23,10,6,6,18,11,12,18,23,24,30,13,17,22,31,15,24,14,14,16,21,15,29,27,22,31,32,46,23,22,20,21,16,20,19,1…	11,9,5,4,4,7,14,20,20,15,6,12,19,13,3,8,9,13,18,16,14,4,9,13,14,18,21,13,13,13,5,7,19,19,6,6,3,3,8,9,24,25,12,13,1,2,7,2,1,4,6,11	11,29,35,22,19,12,41,46,27,32,21,29,40,38,15,18,35,36,22,23,15,18,14,18,29,32,32,34,28,38,36,38,28,33,15,22,14,14,13,22,34,28,43,29,2,6,6,1,28,26,26,29	95	50	1.04548e-06	0.000101352	0.152,0.213,0.283,0.123,0.078,0.12,0.128,0.073,0.174,0.108,0.251,0.328,0.087,0.092,0.126,0.07,0.086,0.024,0.188,0.184,0.128,0.103,0.095,0.048,0.066,0.0,0.208,0.184,0.062,0.019,0.108,0.149,0.197,0.223,0.155,0.14,0.245,0.221,0.142,0.09,0.036,0.095,0.081,0.19,0.085,0.081,0.156,0.156,0.085,0.161,0.055,0.087,0.023,0.046,0.157,0.199,0.11,0.412,0.19,0.38,0.101,0.062,0.174,0.157,0.087,0.057,0.197,0.101,0…	0.345,0.14,0.07,0.087,0.1,0.235,0.152,0.186,0.281,0.198,0.131,0.179,0.2,0.153,0.095,0.19,0.119,0.16,0.301,0.268,0.329,0.105,0.253,0.275,0.203,0.228,0.257,0.168,0.196,0.153,0.068,0.088,0.263,0.233,0.174,0.126,0.101,0.101,0.245,0.177,0.271,0.32,0.128,0.191,0.208,0.149,0.38,0.513,0.018,0.075,0.108,0.166	-0.046
22276	ENSG00000178927	CYBC1	chr17	-	82449430	82449480	82449169	82449292	82450699	82450775	22276	30,31,12,19,37,26,17,26,35,36,17,21,16,19,21,14,23,40,18,23,13,16,30,23,12,18,16,13,19,9,29,22,16,17,17,27,12,9,21,12,14,20,14,3,10,12,7,12,25,26,9,9,27,28,20,28,20,16,14,9,22,23,7,3,40,30,17,12,30,19,17,13,9,2,24,12,4,8,21,23,29,28,16,12,29,20,5,11,17,22,21,21,18,23,16,7,23,17,7,6,16,24,12,15,8,2,7,5,21,29,33,35,29,13,10,15,20,22,8,6,10,10,33,22,27,32,23,29,28,24,38,50,40,33,9,10,23,31,8,13,35,3…	130,145,53,54,143,163,53,60,72,76,60,48,54,52,60,54,87,86,123,125,27,17,30,30,27,36,64,63,35,34,57,46,69,75,89,92,27,29,65,68,56,44,20,10,47,47,60,58,85,105,22,28,31,34,66,70,56,60,25,23,70,55,8,10,112,120,42,44,91,102,22,25,28,18,50,50,66,72,68,55,145,152,50,42,70,75,23,13,36,21,67,66,29,28,83,88,107,97,32,32,61,84,32,21,28,21,39,32,64,60,100,108,88,89,62,59,39,53,25,33,53,41,44,46,78,69,99,116,…	24,27,45,29,18,22,48,55,36,29,37,35,27,19,30,32,47,45,36,40,47,48,49,26,23,29,32,24,27,27,48,49,61,48,24,34,22,12,15,16,29,25,18,20,8,8,42,42,23,12,27,18	150,171,123,106,85,92,125,134,148,137,135,119,72,88,100,141,204,166,164,169,220,181,133,134,115,112,125,114,100,99,197,204,159,160,104,80,33,30,60,56,142,151,73,92,50,28,109,126,58,44,140,125	100	50	5.05445e-07	5.17669e-05	0.103,0.097,0.102,0.15,0.115,0.074,0.138,0.178,0.196,0.191,0.124,0.179,0.129,0.154,0.149,0.115,0.117,0.189,0.068,0.084,0.194,0.32,0.333,0.277,0.182,0.2,0.111,0.094,0.213,0.117,0.203,0.193,0.104,0.102,0.087,0.128,0.182,0.134,0.139,0.081,0.111,0.185,0.259,0.13,0.096,0.113,0.055,0.094,0.128,0.11,0.17,0.138,0.303,0.292,0.132,0.167,0.152,0.118,0.219,0.164,0.136,0.173,0.304,0.13,0.152,0.111,0.168,0.12,…	0.074,0.073,0.155,0.12,0.096,0.107,0.161,0.17,0.108,0.096,0.121,0.128,0.158,0.097,0.13,0.102,0.103,0.119,0.099,0.106,0.097,0.117,0.156,0.088,0.091,0.115,0.113,0.095,0.119,0.12,0.109,0.107,0.161,0.13,0.103,0.175,0.25,0.167,0.111,0.125,0.093,0.076,0.11,0.098,0.074,0.125,0.162,0.143,0.165,0.12,0.088,0.067	0.027
22299	ENSG00000189067	LITAF	chr16	-	11575405	11575586	11556510	11556735	11586885	11586919	22299	25,25,18,29,70,63,6,16,34,30,15,7,19,14,17,8,15,8,20,15,15,13,12,28,24,20,30,32,38,38,11,12,20,12,27,42,19,21,43,21,21,13,6,6,30,27,22,29,24,24,27,23,22,16,16,15,7,2,17,17,12,14,6,5,13,10,16,12,39,28,14,9,3,4,7,19,7,4,20,9,21,10,40,33,11,6,14,9,22,29,6,8,19,36,6,4,0,1,1,0,13,12,8,7,16,10,8,12,38,23,18,13,0,1,14,14,4,3,17,19,9,5,21,20,28,28,40,34,1,3,5,3,1,1,10,8,12,6,11,11,5,10,34,27,38,28,32,17,…	764,804,481,470,1108,1113,550,561,1232,1112,428,418,426,402,688,655,742,842,772,757,294,323,578,615,323,359,644,596,696,677,399,397,700,728,871,844,406,379,820,807,606,620,304,270,661,652,946,898,902,892,487,466,656,638,510,503,322,302,323,316,522,483,799,806,656,640,630,583,1090,1030,308,330,301,284,493,440,251,268,609,531,683,627,529,560,318,302,322,330,627,624,341,326,344,351,135,150,47,56,51,…	9,8,23,22,3,5,0,1,16,9,13,7,12,4,29,20,22,15,10,10,16,19,19,13,9,10,6,6,25,31,37,33,12,15,14,19,1,1,4,0,3,1,9,12,0,0,0,1,0,0,8,9	353,334,1182,1173,160,191,83,89,735,706,729,683,557,557,1276,1223,911,934,1161,1129,1051,1031,1176,1217,441,476,620,565,987,981,708,663,710,706,871,865,50,29,55,49,225,168,438,435,12,6,121,109,56,42,642,589	100	50	0	0	0.016,0.015,0.018,0.03,0.031,0.028,0.005,0.014,0.014,0.013,0.017,0.008,0.022,0.017,0.012,0.006,0.01,0.005,0.013,0.01,0.025,0.02,0.01,0.022,0.036,0.027,0.023,0.026,0.027,0.027,0.014,0.015,0.014,0.008,0.015,0.024,0.023,0.027,0.026,0.013,0.017,0.01,0.01,0.011,0.022,0.02,0.011,0.016,0.013,0.013,0.027,0.024,0.016,0.012,0.015,0.015,0.011,0.003,0.026,0.026,0.011,0.014,0.004,0.003,0.01,0.008,0.013,0.01,0…	0.013,0.012,0.01,0.009,0.009,0.013,0.0,0.006,0.011,0.006,0.009,0.005,0.011,0.004,0.011,0.008,0.012,0.008,0.004,0.004,0.008,0.009,0.008,0.005,0.01,0.01,0.005,0.005,0.013,0.016,0.025,0.024,0.008,0.011,0.008,0.011,0.01,0.017,0.035,0.0,0.007,0.003,0.01,0.014,0.0,0.0,0.0,0.005,0.0,0.0,0.006,0.008	0.006
22372	ENSG00000185627	PSMD13	chr11	+	251819	251936	250802	250865	252504	252845	22372	141,166,132,121,177,181,145,160,138,137,188,174,179,186,162,129,133,146,191,180,170,159,130,141,224,203,174,186,104,119,206,197,134,140,155,176,181,190,177,168,177,178,139,161,147,155,132,157,194,222,135,134,160,154,169,172,203,174,172,176,121,131,86,102,197,235,140,159,365,361,182,180,90,96,133,149,208,216,131,141,133,158,184,204,177,164,128,115,141,150,194,190,184,187,213,192,292,247,135,120,23…	13,8,12,7,6,13,14,13,2,2,6,3,9,9,5,5,7,9,11,9,6,7,9,7,10,10,8,6,2,2,11,7,10,12,12,15,13,6,8,15,9,4,5,5,4,7,9,9,8,4,5,4,7,7,9,6,11,4,7,8,9,7,70,58,5,10,11,8,18,25,11,15,2,6,6,9,14,7,6,7,12,13,9,6,6,11,5,6,4,5,10,11,3,3,15,7,18,15,9,7,6,10,1,5,5,3,8,9,10,12,7,14,24,29,7,7,11,22,3,3,12,12,2,3,3,10,7,4,14,9,8,13,9,7,6,7,5,5,2,2,18,17,3,10,8,4,12,10,10,8,7,11,3,7,4,3,9,1,6,7,7,12,12,0,5,10,15,12,14,13…	2.76327e+155	12,11,4,6,12,10,27,30,16,16,6,5,14,9,24,19,17,16,7,9,6,8,5,2,13,14,5,7,7,3,8,16,25,18,7,6,13,9,16,15,15,8,7,6,8,15,19,13,24,24,11,10	100	50	0.000278358	0.0173008	0.844,0.912,0.846,0.896,0.937,0.874,0.838,0.86,0.972,0.972,0.94,0.967,0.909,0.912,0.942,0.928,0.905,0.89,0.897,0.909,0.934,0.919,0.878,0.91,0.918,0.91,0.916,0.939,0.963,0.967,0.904,0.934,0.87,0.854,0.866,0.854,0.874,0.941,0.917,0.848,0.908,0.957,0.933,0.942,0.948,0.917,0.88,0.897,0.924,0.965,0.931,0.944,0.92,0.917,0.904,0.935,0.902,0.956,0.925,0.917,0.871,0.903,0.381,0.468,0.952,0.922,0.864,0.909…	0.92,0.937,0.97,0.952,0.943,0.954,0.888,0.88,0.911,0.899,0.96,0.96,0.897,0.931,0.85,0.869,0.922,0.916,0.947,0.926,0.958,0.946,0.944,0.98,0.921,0.914,0.971,0.957,0.937,0.972,0.957,0.914,0.829,0.871,0.941,0.94,0.929,0.944,0.911,0.919,0.928,0.958,0.945,0.958,0.963,0.929,0.899,0.93,0.895,0.898,0.94,0.946	-0.018
22474	ENSG00000115129	TP53I3	chr2	-	24079443	24079640	24077432	24077761	24080818	24081031	22474	55,49,45,29,19,23,30,18,26,27,25,23,19,18,52,38,59,67,85,93,17,15,56,66,34,22,35,36,53,34,31,20,29,32,49,53,52,49,32,25,29,36,85,92,38,41,18,20,45,50,37,26,73,62,30,28,43,24,29,29,34,26,38,31,54,34,16,23,85,80,58,52,8,15,20,24,62,48,62,48,38,40,22,24,75,76,45,54,36,35,37,30,38,37,91,71,81,78,46,48,37,64,12,14,22,15,8,11,21,18,14,15,45,48,25,16,17,16,35,37,77,59,20,16,18,18,41,24,29,36,59,70,184,1…	5,4,0,2,2,3,1,3,3,5,0,3,3,1,1,2,5,8,17,11,4,1,5,6,1,2,3,7,6,3,2,4,4,0,1,1,4,2,2,3,2,4,9,14,2,2,3,4,6,0,1,4,2,8,4,6,3,2,3,1,1,2,5,3,2,4,3,3,7,9,3,4,1,1,3,1,9,10,5,4,15,7,1,0,1,2,6,3,3,3,2,4,0,3,6,7,2,4,9,3,10,5,0,1,1,0,2,0,0,1,3,1,4,1,1,1,0,3,3,2,6,7,0,1,1,0,5,1,0,5,3,6,18,13,1,2,0,1,2,4,0,3,5,1,1,3,2,1,14,8,8,5,8,5,1,2,0,2,2,1,4,2,5,8,4,2,5,9,2,2,1,1,2,0,0,0,3,4,10,6,4,2,4,3,7,2,5,1,3,6,4,3,8,4,7…	49,56,49,51,43,50,80,88,27,20,31,42,12,18,93,78,27,40,65,74,59,50,25,18,15,20,50,38,65,65,106,113,64,55,73,62,54,44,47,44,37,42,34,33,22,25,96,123,32,35,64,50	10,6,6,5,7,7,10,10,3,2,5,3,0,0,7,11,1,2,15,11,3,5,3,4,1,1,9,3,2,6,10,8,9,5,3,2,6,9,2,6,7,3,3,4,7,3,27,16,4,3,2,4	100	50	0.000356543	0.0213843	0.846,0.86,1.0,0.879,0.826,0.793,0.938,0.75,0.812,0.73,1.0,0.793,0.76,0.9,0.963,0.905,0.855,0.807,0.714,0.809,0.68,0.882,0.848,0.846,0.944,0.846,0.854,0.72,0.815,0.85,0.886,0.714,0.784,1.0,0.961,0.964,0.867,0.925,0.889,0.806,0.879,0.818,0.825,0.767,0.905,0.911,0.75,0.714,0.789,1.0,0.949,0.765,0.948,0.795,0.789,0.7,0.878,0.857,0.829,0.935,0.944,0.867,0.792,0.838,0.931,0.81,0.727,0.793,0.859,0.816,…	0.71,0.824,0.803,0.836,0.754,0.781,0.8,0.815,0.818,0.833,0.756,0.875,1.0,1.0,0.869,0.78,0.931,0.909,0.684,0.771,0.908,0.833,0.806,0.692,0.882,0.909,0.735,0.864,0.942,0.844,0.841,0.876,0.78,0.846,0.924,0.939,0.818,0.71,0.922,0.786,0.725,0.875,0.85,0.805,0.611,0.806,0.64,0.794,0.8,0.854,0.941,0.862	0.026
22524	ENSG00000134248	LAMTOR5	chr1	-	110407032	110407128	110406317	110406379	110407585	110407668	22524	10,9,6,5,5,5,5,5,5,4,1,3,8,6,2,1,6,9,7,8,8,12,0,3,7,10,16,7,0,3,8,9,8,4,1,0,7,10,6,9,20,24,14,25,9,10,9,10,2,3,2,3,6,8,17,25,26,15,25,19,11,10,119,120,7,4,8,4,15,12,9,10,6,8,6,8,13,17,12,17,26,19,13,6,16,10,2,9,1,8,11,9,10,4,9,6,5,4,2,4,7,8,4,3,5,8,20,15,23,27,6,2,5,5,9,9,8,11,8,4,6,2,5,5,2,1,7,12,5,4,3,5,5,3,0,3,2,4,15,9,0,0,5,5,2,1,8,7,16,8,4,2,6,2,10,7,1,5,2,2,4,3,3,2,2,3,4,8,1,3,6,13,8,7,6,2,…	198,200,119,116,132,126,169,135,235,212,201,220,227,208,217,212,149,171,217,218,145,111,163,181,187,200,195,187,154,147,207,200,152,153,154,127,221,251,177,170,342,293,405,449,379,352,212,207,183,186,146,137,180,180,236,222,230,240,271,288,187,191,175,159,146,161,141,145,245,284,194,172,126,136,170,159,275,275,234,230,268,257,258,246,295,250,170,205,239,223,236,215,211,236,193,175,108,104,154,153…	6,7,5,13,6,5,2,6,9,7,2,6,5,3,6,3,6,3,9,7,4,5,25,18,3,5,9,4,1,5,9,12,15,22,7,4,2,1,10,10,2,4,12,6,7,5,29,17,3,2,7,14	3.42325e+155	100	50	4.24784e-11	7.35687e-09	0.025,0.022,0.025,0.021,0.019,0.019,0.015,0.018,0.011,0.009,0.002,0.007,0.017,0.014,0.005,0.002,0.02,0.026,0.016,0.018,0.027,0.051,0.0,0.008,0.018,0.024,0.039,0.018,0.0,0.01,0.019,0.022,0.026,0.013,0.003,0.0,0.016,0.02,0.017,0.026,0.028,0.039,0.017,0.027,0.012,0.014,0.021,0.024,0.005,0.008,0.007,0.011,0.016,0.022,0.035,0.053,0.053,0.03,0.044,0.032,0.029,0.026,0.254,0.274,0.023,0.012,0.028,0.014,0…	0.009,0.011,0.011,0.031,0.015,0.01,0.005,0.013,0.019,0.018,0.004,0.01,0.015,0.011,0.009,0.005,0.012,0.006,0.011,0.009,0.005,0.006,0.028,0.023,0.01,0.014,0.012,0.006,0.002,0.012,0.012,0.015,0.017,0.026,0.011,0.006,0.006,0.003,0.025,0.031,0.006,0.009,0.029,0.018,0.025,0.022,0.029,0.018,0.009,0.006,0.009,0.021	0.006
22697	ENSG00000156976	EIF4A2	chr3	+	186788309	186788416	186787802	186787882	186789124	186789881	22697	69,72,72,55,34,31,101,125,65,78,72,74,93,67,53,49,59,63,82,80,155,151,60,66,138,135,71,47,35,38,138,134,56,60,79,74,76,69,42,58,67,46,48,36,61,60,75,58,68,71,73,51,88,73,80,76,45,46,107,111,47,47,269,265,56,50,73,82,148,133,35,17,42,32,36,44,45,44,64,69,34,41,66,54,28,31,62,62,69,48,61,50,63,69,27,32,16,13,12,16,85,79,6,14,95,102,30,38,106,89,88,111,39,19,118,136,108,91,88,102,69,68,36,36,24,23,7…	168,149,74,73,138,156,235,185,170,139,181,147,269,254,105,148,145,143,96,99,298,296,262,249,291,280,118,131,181,181,249,237,173,144,158,182,236,232,112,88,150,155,86,85,76,82,78,95,275,258,138,138,174,178,102,95,122,108,193,182,57,75,59,60,142,172,154,152,223,178,135,145,69,49,70,72,66,59,117,116,66,61,109,118,98,83,137,99,152,187,141,164,226,201,19,15,78,66,17,16,140,169,72,77,169,158,89,110,154…	22,23,76,85,21,33,58,45,71,84,50,36,120,123,77,65,68,65,30,28,24,16,53,43,53,56,42,42,68,70,78,65,80,62,50,54,30,41,54,57,52,36,119,106,18,17,13,16,40,38,61,68	123,124,215,219,138,125,288,280,186,188,191,230,439,426,186,176,329,324,181,159,175,158,163,155,272,285,167,188,332,316,173,174,87,82,234,219,164,147,163,160,156,178,306,297,94,91,56,41,171,157,261,240	100	50	0	0	0.17,0.195,0.327,0.274,0.11,0.09,0.177,0.253,0.16,0.219,0.166,0.201,0.147,0.117,0.202,0.142,0.169,0.181,0.299,0.288,0.206,0.203,0.103,0.117,0.192,0.194,0.231,0.152,0.088,0.095,0.217,0.22,0.139,0.172,0.2,0.169,0.139,0.129,0.158,0.248,0.183,0.129,0.218,0.175,0.286,0.268,0.325,0.234,0.11,0.121,0.209,0.156,0.202,0.17,0.282,0.286,0.156,0.176,0.217,0.234,0.292,0.239,0.695,0.688,0.165,0.127,0.192,0.212,…	0.082,0.085,0.15,0.163,0.071,0.117,0.091,0.074,0.16,0.183,0.116,0.073,0.12,0.126,0.171,0.156,0.094,0.091,0.077,0.081,0.064,0.048,0.14,0.122,0.089,0.089,0.112,0.1,0.093,0.1,0.184,0.157,0.315,0.274,0.097,0.11,0.084,0.122,0.142,0.151,0.143,0.092,0.163,0.151,0.087,0.085,0.104,0.163,0.105,0.108,0.105,0.124	0.054
22730	ENSG00000163479	SSR2	chr1	-	156014960	156015069	156011580	156011887	156018131	156018368	22730	273,297,211,207,282,293,332,351,293,246,308,388,426,384,209,216,328,287,344,359,415,450,271,236,454,454,255,281,194,169,433,452,282,248,303,293,307,325,279,273,224,242,242,246,212,222,219,227,414,377,251,253,281,303,258,275,250,262,293,335,264,250,277,283,362,331,248,268,623,651,273,260,132,120,236,244,314,316,286,266,260,225,315,274,245,262,217,190,264,281,333,340,267,253,229,234,335,324,200,181…	7,8,2,3,11,4,10,11,7,7,9,2,11,8,2,5,5,2,7,7,6,4,6,7,14,10,15,13,7,3,14,12,2,5,5,3,10,5,4,6,15,10,9,4,4,9,8,6,2,7,10,9,14,10,13,9,10,5,4,1,3,6,27,29,13,12,9,4,21,11,7,4,5,2,7,7,9,8,15,12,6,7,11,9,11,3,1,8,14,8,3,10,15,17,10,11,8,5,2,0,6,7,12,9,7,12,7,5,13,11,4,14,8,9,4,3,7,7,12,7,11,12,9,7,7,6,17,20,8,14,11,5,6,4,3,4,4,4,3,5,10,5,12,5,4,3,13,8,4,10,9,5,9,8,6,3,5,8,2,2,6,3,9,2,5,4,10,16,7,11,6,6,6,…	3.65371e+155	11,9,11,21,9,8,5,9,11,11,2,7,6,8,9,8,6,8,13,6,7,3,8,9,4,3,8,5,4,6,5,5,5,7,6,9,3,5,3,5,2,2,6,6,1,2,4,3,5,2,7,2	100	50	0	0	0.951,0.949,0.981,0.972,0.928,0.973,0.943,0.941,0.954,0.946,0.945,0.99,0.951,0.96,0.981,0.956,0.97,0.986,0.961,0.962,0.972,0.983,0.958,0.944,0.942,0.958,0.895,0.915,0.933,0.966,0.939,0.95,0.986,0.961,0.968,0.98,0.939,0.97,0.972,0.958,0.882,0.924,0.931,0.969,0.964,0.925,0.932,0.95,0.99,0.964,0.926,0.934,0.909,0.938,0.908,0.939,0.926,0.963,0.973,0.994,0.978,0.954,0.837,0.83,0.933,0.932,0.932,0.971,…	0.943,0.954,0.944,0.891,0.945,0.956,0.987,0.975,0.951,0.948,0.987,0.958,0.975,0.966,0.958,0.963,0.977,0.97,0.942,0.972,0.967,0.984,0.94,0.941,0.984,0.989,0.967,0.978,0.976,0.964,0.978,0.977,0.978,0.972,0.968,0.949,0.986,0.978,0.985,0.975,0.991,0.991,0.978,0.976,0.993,0.986,0.977,0.982,0.979,0.992,0.97,0.992	-0.02
22857	ENSG00000066136	NFYC	chr1	+	40766917	40766974	40766595	40766703	40769355	40769415	22857	3,9,10,6,7,17,8,11,5,4,7,6,8,7,8,9,10,12,20,13,7,10,20,11,10,10,14,12,15,18,13,2,8,15,12,8,6,5,5,9,12,8,10,9,10,9,15,14,9,4,10,11,14,22,11,18,13,13,15,14,12,13,38,34,9,9,12,8,13,20,4,6,10,5,10,8,8,12,10,11,21,13,16,7,5,11,4,8,9,12,8,15,14,10,13,16,8,8,5,2,6,6,5,8,8,7,13,13,14,13,10,14,0,7,7,11,5,4,3,7,16,11,7,8,13,13,10,8,10,7,12,6,4,7,5,4,7,7,6,3,7,7,5,5,6,10,8,7,6,5,4,6,5,1,3,6,5,5,3,5,10,7,8,5…	48,40,26,31,42,44,47,38,50,50,48,43,47,48,30,40,31,30,55,55,23,17,35,36,50,32,43,34,46,51,37,48,51,27,45,64,44,40,69,55,46,54,37,34,57,36,39,51,48,31,45,52,39,40,42,34,22,29,21,38,15,27,9,19,47,45,33,39,49,60,28,33,38,25,32,25,24,33,41,24,37,36,35,50,51,46,31,42,33,36,39,40,32,49,52,37,31,36,9,7,81,46,43,33,34,37,56,39,33,35,30,34,35,46,55,51,36,28,35,32,41,40,34,41,58,67,54,58,49,53,46,47,44,48,…	7,11,10,11,10,10,10,7,9,18,12,5,7,4,5,4,12,9,2,5,6,13,2,12,2,9,9,11,15,9,9,12,18,8,12,11,4,3,4,5,9,4,9,15,0,1,5,8,9,4,5,8	39,42,41,31,32,32,50,55,46,67,55,61,52,38,55,59,61,55,52,50,82,88,40,56,50,51,52,47,68,39,47,58,74,66,87,72,26,35,40,31,73,75,72,44,21,20,41,29,46,42,62,43	100	50	3.49787e-08	4.10008e-06	0.03,0.101,0.161,0.088,0.077,0.162,0.078,0.126,0.048,0.038,0.068,0.065,0.078,0.068,0.118,0.101,0.139,0.167,0.154,0.106,0.132,0.227,0.222,0.133,0.091,0.135,0.14,0.15,0.14,0.15,0.149,0.02,0.073,0.217,0.118,0.059,0.064,0.059,0.035,0.076,0.115,0.069,0.119,0.117,0.081,0.111,0.161,0.121,0.086,0.061,0.1,0.096,0.152,0.216,0.116,0.209,0.228,0.183,0.263,0.156,0.286,0.194,0.679,0.472,0.087,0.091,0.154,0.093…	0.082,0.116,0.109,0.151,0.135,0.135,0.091,0.06,0.089,0.118,0.098,0.039,0.063,0.05,0.043,0.033,0.09,0.076,0.019,0.048,0.035,0.069,0.024,0.097,0.02,0.081,0.08,0.105,0.099,0.103,0.087,0.094,0.108,0.057,0.065,0.071,0.071,0.041,0.048,0.075,0.058,0.026,0.059,0.146,0.0,0.024,0.057,0.121,0.089,0.045,0.039,0.085	0.034
22905	ENSG00000160688	FLAD1	chr1	+	154989559	154989707	154988104	154988849	154990158	154990257	22905	18,28,21,15,27,19,25,20,14,16,37,20,26,42,8,10,12,21,24,21,25,34,13,14,32,20,24,15,10,12,28,22,18,19,28,14,24,16,9,11,2,6,8,1,8,9,4,9,17,32,9,11,21,25,22,10,8,4,13,21,2,10,9,4,22,26,18,9,19,35,18,10,8,6,6,11,25,19,7,15,14,7,12,17,2,4,16,10,8,12,13,23,11,4,11,11,31,44,6,8,41,39,8,9,10,12,15,14,18,14,35,35,29,24,12,19,38,29,25,22,24,23,16,20,16,15,29,24,43,45,27,38,36,26,18,22,27,20,7,15,38,52,38,3…	6,4,1,2,1,0,2,1,1,1,1,6,6,8,1,3,0,1,6,0,4,3,2,4,5,3,0,0,1,0,3,6,0,0,5,1,4,1,1,0,2,5,0,1,0,0,0,1,3,4,2,1,0,3,1,2,0,0,2,1,0,2,2,3,1,1,0,0,1,5,1,0,2,1,1,1,0,0,0,0,2,2,0,1,1,0,5,0,3,0,0,2,1,2,6,3,1,2,0,1,3,2,0,0,2,2,2,1,0,0,4,8,4,4,1,0,3,4,4,2,2,1,3,0,0,1,4,3,1,4,1,3,0,5,3,1,2,1,1,3,2,8,3,3,2,0,3,0,0,0,0,0,3,0,2,0,1,2,3,1,0,1,1,3,2,5,2,4,6,4,2,1,5,1,5,3,1,2,3,4,9,5,1,1,1,4,0,1,4,6,5,2,2,5,3,2,0,3,1,0	25,27,20,12,16,11,51,69,29,20,16,17,46,37,25,13,24,22,14,12,18,19,14,8,43,34,28,26,27,23,29,29,15,22,24,21,35,21,31,36,34,35,51,42,23,39,10,8,28,22,10,15	2,0,6,1,2,6,4,10,4,8,5,4,4,1,2,0,1,2,3,1,2,5,1,2,3,6,3,5,3,1,3,1,1,2,1,3,7,3,3,3,6,1,13,5,6,8,2,3,7,3,3,5	100	50	2.63972e-05	0.00198967	0.6,0.778,0.913,0.789,0.931,1.0,0.862,0.909,0.875,0.889,0.949,0.625,0.684,0.724,0.8,0.625,1.0,0.913,0.667,1.0,0.758,0.85,0.765,0.636,0.762,0.769,1.0,1.0,0.833,1.0,0.824,0.647,1.0,1.0,0.737,0.875,0.75,0.889,0.818,1.0,0.333,0.375,1.0,0.333,1.0,1.0,1.0,0.818,0.739,0.8,0.692,0.846,1.0,0.806,0.917,0.714,1.0,1.0,0.765,0.913,1.0,0.714,0.692,0.4,0.917,0.929,1.0,1.0,0.905,0.778,0.9,1.0,0.667,0.75,0.75,0.8…	0.862,1.0,0.625,0.857,0.8,0.478,0.864,0.775,0.784,0.556,0.615,0.68,0.852,0.949,0.862,1.0,0.923,0.846,0.7,0.857,0.818,0.655,0.875,0.667,0.878,0.739,0.824,0.722,0.818,0.92,0.829,0.935,0.882,0.846,0.923,0.778,0.714,0.778,0.838,0.857,0.739,0.946,0.662,0.808,0.657,0.709,0.714,0.571,0.667,0.786,0.625,0.6	0.052
23084	ENSG00000067066	SP100	chr2	+	230464066	230464150	230462434	230462518	230466300	230466354	23084	387,372,141,119,385,432,188,171,339,382,157,169,209,178,224,213,205,198,280,258,222,220,217,224,285,312,317,297,203,200,229,218,151,159,251,199,239,242,261,275,400,399,243,213,213,201,259,247,199,169,225,202,252,274,330,291,205,176,226,248,283,264,115,103,198,221,184,205,421,392,167,158,131,117,180,170,165,174,277,286,219,220,249,240,179,155,211,221,286,277,137,129,186,192,169,152,95,118,46,59,24…	3,5,0,4,4,2,0,1,4,3,1,3,2,3,5,2,8,4,4,4,5,4,7,4,11,7,7,6,3,1,7,3,0,0,2,3,1,1,2,2,5,3,2,3,2,1,4,5,1,3,3,2,14,17,4,12,7,7,8,19,4,3,114,90,2,3,6,1,8,5,3,1,1,2,3,4,4,8,8,4,5,8,0,2,1,7,2,2,7,14,3,1,3,1,11,13,3,2,3,3,4,3,2,1,1,3,4,7,35,35,2,1,3,5,7,7,8,4,2,1,5,4,1,1,1,2,0,0,0,3,0,2,0,0,5,1,0,0,3,2,5,5,1,3,4,1,3,4,4,0,2,5,2,1,4,3,5,3,1,1,3,1,3,4,0,0,0,1,3,2,5,11,0,0,3,1,6,5,2,3,0,5,0,3,2,0,1,4,4,2,2,1,1…	188,205,238,275,191,189,173,201,224,241,168,185,341,348,176,175,310,264,299,303,225,252,327,318,142,142,151,157,275,321,236,283,304,329,298,226,119,135,65,113,188,201,183,190,82,105,201,154,116,114,274,230	1,1,2,2,3,2,1,1,1,2,3,3,1,6,0,1,3,1,0,1,1,1,5,3,0,1,1,1,1,0,3,3,9,2,0,0,3,0,12,6,2,1,7,5,0,0,5,6,1,3,0,3	100	50	1.28786e-14	3.28117e-12	0.985,0.974,1.0,0.937,0.98,0.991,1.0,0.988,0.977,0.985,0.987,0.966,0.981,0.967,0.957,0.982,0.928,0.961,0.972,0.97,0.957,0.965,0.939,0.966,0.928,0.957,0.958,0.961,0.971,0.99,0.942,0.973,1.0,1.0,0.984,0.971,0.992,0.992,0.985,0.986,0.976,0.985,0.984,0.973,0.982,0.99,0.97,0.961,0.99,0.966,0.974,0.981,0.9,0.89,0.976,0.924,0.936,0.926,0.934,0.867,0.973,0.978,0.335,0.364,0.98,0.974,0.939,0.99,0.963,0.97…	0.989,0.99,0.983,0.986,0.97,0.979,0.989,0.99,0.991,0.984,0.966,0.969,0.994,0.967,1.0,0.989,0.981,0.992,1.0,0.993,0.991,0.992,0.97,0.981,1.0,0.986,0.987,0.987,0.993,1.0,0.975,0.979,0.944,0.988,1.0,1.0,0.952,1.0,0.73,0.904,0.979,0.99,0.929,0.95,1.0,1.0,0.953,0.928,0.983,0.95,1.0,0.975	-0.013
23198	ENSG00000104852	SNRNP70	chr19	+	49102113	49102173	49101389	49101471	49104633	49104735	23198	53,64,47,46,48,48,101,128,50,38,68,57,77,91,36,44,72,69,54,53,90,107,66,101,95,83,74,71,69,76,91,109,50,53,75,70,96,78,59,57,48,47,33,37,36,60,59,61,75,75,64,62,86,90,70,72,46,41,79,79,26,33,63,67,81,60,57,49,79,67,35,45,26,15,48,51,22,27,38,47,47,51,41,40,48,45,33,41,55,48,62,66,56,71,40,37,33,33,6,13,86,68,13,10,53,48,48,37,70,76,85,125,26,30,124,118,95,72,64,59,46,49,37,44,66,84,59,52,93,67,30…	33,29,35,22,7,14,20,25,15,19,33,30,37,34,11,22,27,33,37,31,43,35,16,14,35,29,9,14,5,8,46,37,34,22,30,21,29,34,16,10,11,12,6,9,9,20,14,9,44,35,17,9,32,24,22,11,11,7,26,23,11,20,17,12,34,21,20,23,30,43,22,12,13,10,14,5,22,22,18,14,16,27,33,22,15,13,13,16,13,22,23,23,10,16,36,30,39,46,10,11,51,53,14,12,12,24,12,10,16,19,52,41,74,77,27,28,52,46,41,53,36,30,34,32,12,9,24,23,24,50,56,42,47,33,41,26,31,…	36,42,50,53,23,22,58,59,48,56,56,58,108,121,32,31,70,62,30,34,41,37,52,47,64,48,45,48,67,67,47,64,26,22,60,60,41,39,54,80,54,64,133,130,22,31,13,17,32,25,81,63	34,21,13,18,30,28,99,92,36,33,54,26,41,33,29,39,60,40,16,19,30,32,14,9,38,40,44,32,30,28,41,42,42,55,13,8,40,33,34,32,36,50,38,39,33,35,29,48,20,32,37,41	100	50	8.37344e-09	1.08461e-06	0.445,0.525,0.402,0.511,0.774,0.632,0.716,0.719,0.625,0.5,0.507,0.487,0.51,0.572,0.621,0.5,0.571,0.511,0.422,0.461,0.511,0.605,0.673,0.783,0.576,0.589,0.804,0.717,0.873,0.826,0.497,0.596,0.424,0.546,0.556,0.625,0.623,0.534,0.648,0.74,0.686,0.662,0.733,0.673,0.667,0.6,0.678,0.772,0.46,0.517,0.653,0.775,0.573,0.652,0.614,0.766,0.676,0.745,0.603,0.632,0.542,0.452,0.649,0.736,0.544,0.588,0.588,0.516,…	0.346,0.5,0.658,0.596,0.277,0.282,0.227,0.243,0.4,0.459,0.341,0.527,0.568,0.647,0.356,0.284,0.368,0.437,0.484,0.472,0.406,0.366,0.65,0.723,0.457,0.375,0.338,0.429,0.528,0.545,0.364,0.432,0.236,0.167,0.698,0.789,0.339,0.371,0.443,0.556,0.429,0.39,0.636,0.625,0.25,0.307,0.183,0.15,0.444,0.281,0.523,0.434	0.109
23223	ENSG00000184162	NR2C2AP	chr19	-	19202469	19202575	19202057	19202398	19202790	19202881	23223	8,11,13,9,12,10,26,14,6,6,15,13,17,23,9,4,6,11,12,13,25,18,17,5,16,19,2,5,8,5,22,20,10,8,6,13,5,8,9,9,2,2,4,7,7,1,2,1,20,24,2,13,10,3,3,4,3,6,9,8,8,7,5,3,10,27,16,11,10,9,6,9,5,4,4,8,3,10,8,1,4,5,8,8,3,1,5,5,3,5,10,13,4,3,15,8,13,13,3,2,22,19,2,1,5,2,2,2,5,1,20,17,12,19,18,16,19,13,10,13,10,22,12,17,5,5,13,15,21,31,19,15,15,24,5,24,18,19,5,3,37,26,24,16,10,9,6,5,6,4,5,6,6,4,7,17,2,9,15,7,8,13,12,…	1,3,1,2,0,0,1,6,1,1,2,5,2,4,0,0,2,0,2,4,1,2,0,0,2,0,0,1,0,0,5,1,0,0,1,0,0,1,0,1,1,1,0,0,0,0,0,1,3,2,2,2,2,1,0,0,0,0,1,0,0,2,2,2,3,2,3,5,1,3,0,0,1,0,0,2,0,3,2,0,3,2,1,1,3,3,1,1,0,0,5,2,0,2,3,1,0,1,0,0,2,3,0,0,2,0,1,1,3,2,3,2,1,1,0,1,5,1,4,1,1,2,2,0,0,0,0,0,4,2,3,2,1,1,0,1,0,0,1,1,2,4,1,0,2,0,3,0,0,2,0,0,0,0,2,2,1,0,0,2,2,0,0,1,0,0,1,2,1,1,2,0,2,1,3,1,0,0,3,6,5,6,1,0,3,3,0,0,0,1,0,0,0,3,5,12,1,1,0,4	4,2,8,9,15,10,19,38,15,13,8,17,38,30,17,12,30,17,7,6,21,9,8,9,31,33,8,12,12,10,5,14,9,11,9,10,16,18,18,23,20,20,17,16,19,17,5,3,19,14,20,10	0,1,0,0,0,0,9,3,5,7,0,0,2,6,1,0,0,3,1,0,0,1,0,0,0,2,0,3,3,2,0,1,1,2,0,4,0,2,4,5,2,1,0,5,3,7,2,0,3,4,1,2	100	50	0.000107074	0.00738448	0.8,0.647,0.867,0.692,1.0,1.0,0.929,0.538,0.75,0.75,0.789,0.565,0.81,0.742,1.0,1.0,0.6,1.0,0.75,0.619,0.926,0.818,1.0,1.0,0.8,1.0,1.0,0.714,1.0,1.0,0.688,0.909,1.0,1.0,0.75,1.0,1.0,0.8,1.0,0.818,0.5,0.5,1.0,1.0,1.0,1.0,1.0,0.333,0.769,0.857,0.333,0.765,0.714,0.6,1.0,1.0,1.0,1.0,0.818,1.0,1.0,0.636,0.556,0.429,0.625,0.871,0.727,0.524,0.833,0.6,1.0,1.0,0.714,1.0,1.0,0.667,1.0,0.625,0.667,1.0,0.4,0.…	1.0,0.5,1.0,1.0,1.0,1.0,0.514,0.864,0.6,0.481,1.0,1.0,0.905,0.714,0.895,1.0,1.0,0.739,0.778,1.0,1.0,0.818,1.0,1.0,1.0,0.892,1.0,0.667,0.667,0.714,1.0,0.875,0.818,0.733,1.0,0.556,1.0,0.818,0.692,0.697,0.833,0.909,1.0,0.615,0.76,0.548,0.556,1.0,0.76,0.636,0.909,0.714	-0.014
23248	ENSG00000089639	GMIP	chr19	-	19640295	19640360	19640084	19640192	19640445	19640571	23248	306,315,179,186,251,204,232,236,252,219,192,221,176,202,260,282,260,282,294,240,193,156,274,238,160,148,348,340,301,283,222,201,226,245,293,254,259,248,369,413,251,253,180,162,260,270,383,392,314,238,294,270,283,285,324,309,140,105,275,274,137,151,218,201,202,228,241,264,382,411,144,146,149,177,159,113,119,127,255,260,339,323,273,277,118,121,249,207,260,242,140,150,221,240,124,97,64,75,18,13,243,…	8,2,1,3,9,12,7,4,2,2,1,2,3,5,5,5,2,6,6,4,3,2,10,6,1,3,8,7,9,9,4,5,2,3,1,8,5,2,10,11,1,3,3,1,6,0,1,5,3,2,9,7,8,5,15,10,1,2,0,1,5,3,19,17,7,3,5,2,5,8,6,6,2,3,6,2,0,1,7,0,7,4,6,7,5,2,2,3,9,14,2,3,5,10,1,2,3,0,0,0,14,10,4,2,3,1,7,5,7,7,4,5,1,1,6,3,3,3,2,4,1,2,3,3,9,4,12,14,1,3,2,1,0,0,0,1,5,4,1,0,2,1,0,4,2,3,5,4,1,1,11,5,5,0,4,6,2,0,3,0,0,2,3,2,3,2,0,3,2,2,5,6,3,3,1,0,1,5,5,8,0,3,5,6,0,0,5,3,4,0,3,0,…	129,119,254,247,93,100,118,96,223,212,202,212,216,198,228,248,218,213,292,283,305,291,290,284,148,142,165,156,260,262,205,226,253,244,336,284,54,50,42,41,88,78,192,175,16,8,51,67,44,49,228,238	1,1,4,3,1,2,2,0,2,9,2,1,7,3,5,4,2,0,0,1,7,5,5,5,0,0,0,3,6,3,4,1,3,5,1,7,1,0,1,0,2,0,0,3,0,0,3,0,0,0,3,3	100	50	1.26344e-08	1.55176e-06	0.95,0.987,0.989,0.969,0.933,0.895,0.943,0.967,0.984,0.982,0.99,0.982,0.967,0.953,0.963,0.966,0.985,0.959,0.961,0.968,0.97,0.975,0.932,0.952,0.988,0.961,0.956,0.96,0.944,0.94,0.965,0.953,0.983,0.976,0.993,0.941,0.963,0.984,0.949,0.949,0.992,0.977,0.968,0.988,0.956,1.0,0.995,0.975,0.981,0.983,0.942,0.951,0.946,0.966,0.915,0.939,0.986,0.963,1.0,0.993,0.932,0.962,0.852,0.855,0.935,0.974,0.96,0.985,0…	0.985,0.983,0.969,0.976,0.979,0.962,0.967,1.0,0.982,0.922,0.981,0.991,0.939,0.971,0.958,0.969,0.982,1.0,1.0,0.993,0.956,0.967,0.967,0.966,1.0,1.0,1.0,0.963,0.956,0.978,0.962,0.991,0.977,0.961,0.994,0.953,0.964,1.0,0.955,1.0,0.957,1.0,1.0,0.967,1.0,1.0,0.895,1.0,1.0,1.0,0.974,0.975	-0.014
23787	ENSG00000135018	UBQLN1	chr9	-	83666349	83666433	83665029	83665145	83669184	83669327	23787	75,99,50,52,47,38,98,87,50,71,67,65,77,71,79,78,69,97,64,68,98,96,76,61,91,106,88,88,71,61,96,99,57,72,70,70,90,89,64,73,68,84,59,66,47,45,65,58,72,70,50,37,64,55,68,71,35,32,69,63,72,52,65,81,64,74,61,67,103,97,45,36,33,29,28,27,40,25,72,59,59,42,47,42,25,20,64,73,60,40,31,27,47,54,19,12,7,6,11,9,65,64,15,25,76,80,49,68,41,45,104,88,7,4,79,85,33,36,93,71,44,31,70,93,45,49,87,82,12,14,29,24,6,5,7…	2,6,3,1,3,0,2,4,5,3,1,3,6,1,2,4,3,1,0,5,4,6,1,5,3,5,2,2,3,3,6,5,4,1,3,2,6,7,0,0,4,2,0,3,0,0,3,1,10,2,1,3,2,0,2,1,1,0,0,3,3,2,0,1,6,1,3,4,1,3,0,2,2,0,1,0,2,2,3,2,0,0,1,0,1,0,4,6,3,5,0,2,4,0,0,0,0,0,1,1,1,6,1,0,1,1,0,1,7,2,7,6,0,0,2,3,2,2,1,4,1,0,4,5,3,3,3,2,2,1,0,0,0,0,3,4,1,9,1,1,2,1,4,3,3,1,4,4,9,3,1,0,3,6,2,1,1,1,2,7,1,0,2,3,0,0,1,6,3,0,1,5,7,5,4,0,2,1,10,5,0,2,0,4,0,0,1,0,0,0,0,0,0,4,3,1,3,7,2…	31,21,52,42,21,17,39,29,57,62,34,32,72,86,56,65,60,67,82,69,57,32,71,63,38,40,35,37,68,88,37,31,39,43,56,60,8,3,10,5,15,15,42,36,1,4,12,6,9,3,60,42	3,0,2,3,0,0,1,2,2,0,0,1,3,3,4,6,1,5,4,6,3,1,5,1,3,2,0,0,2,2,5,1,1,0,0,3,0,0,0,0,1,0,4,2,0,0,0,0,0,0,0,1	100	50	1.50768e-13	3.39262e-11	0.949,0.892,0.893,0.963,0.887,1.0,0.961,0.916,0.833,0.922,0.971,0.915,0.865,0.973,0.952,0.907,0.92,0.98,1.0,0.872,0.925,0.889,0.974,0.859,0.938,0.914,0.957,0.957,0.922,0.91,0.889,0.908,0.877,0.973,0.921,0.946,0.882,0.864,1.0,1.0,0.895,0.955,1.0,0.917,1.0,1.0,0.915,0.967,0.783,0.946,0.962,0.86,0.941,1.0,0.944,0.973,0.946,1.0,1.0,0.913,0.923,0.929,1.0,0.976,0.842,0.974,0.91,0.893,0.981,0.942,1.0,0.…	0.838,1.0,0.929,0.875,1.0,1.0,0.951,0.879,0.934,1.0,1.0,0.941,0.923,0.935,0.875,0.844,0.968,0.87,0.911,0.852,0.905,0.941,0.877,0.969,0.864,0.909,1.0,1.0,0.944,0.957,0.787,0.939,0.951,1.0,1.0,0.909,1.0,1.0,1.0,1.0,0.882,1.0,0.84,0.9,1.0,1.0,1.0,1.0,1.0,1.0,1.0,0.955	-0.014
23868	ENSG00000184014	DENND5A	chr11	-	9140188	9140248	9139514	9139854	9141939	9142108	23868	20,10,13,7,33,37,14,23,68,68,31,12,13,10,40,25,14,18,24,27,14,17,21,27,37,16,35,29,47,35,18,16,18,17,18,17,36,29,21,19,19,18,20,17,26,28,18,26,18,35,16,16,33,39,19,18,17,18,24,27,26,28,10,7,12,7,19,13,22,24,25,26,12,12,10,10,15,14,29,19,30,40,29,10,33,30,34,31,30,27,40,43,29,24,22,18,21,20,3,6,19,24,11,13,13,15,31,28,19,12,10,12,10,13,22,24,20,23,22,14,24,13,15,30,24,19,21,19,11,7,16,10,5,13,9,9,…	171,194,114,124,266,244,179,180,196,172,222,161,153,146,213,189,110,121,161,159,115,104,127,101,201,209,231,211,215,226,166,184,130,129,161,199,193,189,221,195,239,238,175,159,229,225,216,184,158,163,225,225,207,213,220,193,146,121,107,115,164,149,94,101,160,169,136,131,329,353,161,162,92,72,110,94,96,88,144,163,192,192,197,193,188,203,231,225,304,296,152,165,246,253,139,142,94,99,40,19,192,219,1…	14,20,47,38,69,38,14,12,43,36,15,24,20,29,31,41,34,29,84,72,31,42,41,50,29,18,38,15,33,39,35,22,30,32,47,40,27,26,8,11,44,41,24,27,9,10,21,19,20,19,39,37	160,131,245,218,137,118,89,69,158,165,182,198,131,154,202,197,196,232,226,187,243,241,248,221,122,112,222,226,203,191,183,170,167,156,138,121,106,125,74,91,146,126,191,214,48,64,103,100,130,124,178,190	100	50	0	0	0.055,0.025,0.054,0.027,0.058,0.07,0.038,0.06,0.148,0.165,0.065,0.036,0.041,0.033,0.086,0.062,0.06,0.069,0.069,0.078,0.057,0.076,0.076,0.118,0.084,0.037,0.07,0.064,0.099,0.072,0.051,0.042,0.065,0.062,0.053,0.041,0.085,0.071,0.045,0.046,0.038,0.036,0.054,0.051,0.054,0.059,0.04,0.066,0.054,0.097,0.034,0.034,0.074,0.084,0.041,0.045,0.055,0.069,0.101,0.105,0.073,0.086,0.051,0.033,0.036,0.02,0.065,0.0…	0.042,0.071,0.088,0.08,0.201,0.139,0.073,0.08,0.12,0.098,0.04,0.057,0.071,0.086,0.071,0.094,0.08,0.059,0.157,0.161,0.06,0.08,0.076,0.102,0.106,0.074,0.079,0.032,0.075,0.093,0.087,0.061,0.082,0.093,0.146,0.142,0.113,0.094,0.051,0.057,0.131,0.14,0.059,0.059,0.086,0.072,0.093,0.087,0.071,0.071,0.099,0.089	-0.027
24060	ENSG00000184047	DIABLO	chr12	-	122209772	122209858	122207793	122208577	122216487	122216584	24060	5,1,2,1,6,3,9,8,10,8,9,4,2,7,2,2,0,1,5,4,23,16,3,5,14,16,5,9,1,2,12,15,1,0,7,6,6,1,1,3,8,5,3,1,6,3,8,2,6,0,4,1,2,1,4,4,0,1,12,5,6,7,59,54,7,5,7,5,5,8,0,0,1,8,14,5,6,4,9,6,6,3,3,0,2,2,3,1,1,7,7,10,5,6,6,13,10,4,1,6,3,2,0,1,4,4,15,12,11,12,11,12,4,4,7,9,6,13,5,3,0,3,2,3,0,0,4,6,8,10,1,3,2,0,0,0,1,1,0,2,10,10,7,3,0,1,1,3,1,5,4,4,4,4,0,0,0,0,0,2,3,5,0,1,0,0,6,5,1,1,3,4,4,6,1,2,1,0,6,9,21,4,3,2,0,0,1,…	41,51,15,24,30,29,37,43,22,29,36,38,42,34,23,23,28,35,21,34,31,24,30,29,46,52,31,27,25,22,51,49,40,40,22,27,53,56,15,20,10,28,20,20,22,20,18,27,43,45,29,18,19,20,19,24,19,18,35,29,30,22,15,10,34,32,17,25,50,58,36,16,13,10,20,12,22,19,11,18,19,19,31,30,10,11,26,32,13,14,30,32,24,15,15,25,18,12,16,12,36,42,15,8,29,34,21,19,16,17,26,41,35,42,29,34,30,35,35,35,33,32,31,30,21,16,44,44,44,42,52,31,30,2…	1,3,2,8,5,8,8,4,6,10,1,1,13,12,3,0,3,6,3,2,1,1,3,0,1,1,3,2,6,4,3,2,2,2,6,0,9,4,4,5,10,5,9,9,4,1,1,0,6,8,2,2	18,25,24,26,21,30,75,77,44,46,21,36,51,30,41,40,34,56,31,47,47,39,14,15,54,62,37,26,41,32,27,26,28,37,27,26,38,42,31,25,28,40,31,52,32,36,27,31,39,43,30,25	100	50	0.000344311	0.0208126	0.057,0.01,0.062,0.02,0.091,0.049,0.108,0.085,0.185,0.121,0.111,0.05,0.023,0.093,0.042,0.042,0.0,0.014,0.106,0.056,0.271,0.25,0.048,0.079,0.132,0.133,0.075,0.143,0.02,0.043,0.105,0.133,0.012,0.0,0.137,0.1,0.054,0.009,0.032,0.07,0.286,0.082,0.07,0.024,0.12,0.07,0.182,0.036,0.065,0.0,0.065,0.027,0.05,0.024,0.095,0.077,0.0,0.027,0.146,0.079,0.091,0.137,0.663,0.73,0.093,0.072,0.171,0.091,0.048,0.065,…	0.027,0.057,0.04,0.133,0.106,0.118,0.051,0.025,0.064,0.098,0.023,0.014,0.113,0.167,0.035,0.0,0.042,0.051,0.046,0.021,0.011,0.013,0.097,0.0,0.009,0.008,0.039,0.037,0.068,0.059,0.053,0.037,0.034,0.026,0.1,0.0,0.106,0.045,0.061,0.091,0.152,0.059,0.127,0.08,0.059,0.014,0.018,0.0,0.071,0.085,0.032,0.038	0.023
24139	ENSG00000161526	SAP30BP	chr17	+	75705610	75705693	75704755	75704814	75706007	75706092	24139	6,9,8,10,13,16,19,23,14,14,8,15,8,6,8,4,7,6,32,24,6,8,2,4,8,10,6,12,4,3,12,12,16,4,11,13,11,11,16,16,8,10,7,14,9,10,22,10,16,16,6,7,5,7,12,10,9,10,20,15,4,2,40,53,11,9,11,14,9,8,6,11,9,7,7,14,15,22,4,11,16,14,13,5,5,2,1,6,5,7,13,12,5,3,7,12,7,14,13,10,14,8,4,1,10,6,25,13,13,13,8,9,16,15,12,14,21,12,8,2,5,14,4,5,17,9,11,7,14,15,2,6,6,4,7,13,7,9,17,8,12,19,5,8,10,3,15,12,20,16,8,10,12,3,19,19,11,6,…	54,66,35,44,44,48,48,54,30,26,49,50,44,50,33,29,34,33,49,53,40,50,28,29,54,56,51,46,30,23,38,48,39,25,57,43,43,41,45,37,60,44,34,22,44,40,38,37,40,50,37,35,39,46,38,46,41,47,34,35,36,44,98,78,46,50,32,30,72,88,43,40,35,28,20,25,45,41,42,48,53,43,36,47,39,31,27,46,46,39,43,52,46,38,52,57,58,59,15,23,73,59,33,34,56,56,43,34,37,44,54,68,78,83,59,51,44,42,61,39,58,44,42,48,33,27,82,66,96,89,57,53,57,…	26,20,10,9,14,9,17,21,35,25,8,8,17,19,12,21,30,15,11,16,16,17,21,14,25,28,35,28,16,22,11,14,26,12,24,25,19,20,14,17,14,19,23,24,4,7,16,28,14,21,20,21	45,63,61,48,71,53,98,88,68,66,58,56,55,60,45,64,74,86,51,45,53,50,55,39,73,58,53,53,51,51,61,63,77,62,72,47,55,57,72,66,74,68,92,69,44,47,61,61,72,65,66,48	100	50	8.11813e-10	1.22081e-07	0.053,0.064,0.103,0.102,0.129,0.143,0.165,0.176,0.189,0.212,0.075,0.13,0.083,0.057,0.108,0.065,0.093,0.083,0.246,0.185,0.07,0.074,0.034,0.065,0.069,0.082,0.056,0.115,0.062,0.061,0.136,0.111,0.17,0.074,0.088,0.131,0.113,0.118,0.151,0.178,0.062,0.102,0.093,0.241,0.093,0.111,0.224,0.119,0.167,0.138,0.075,0.091,0.06,0.071,0.136,0.098,0.099,0.096,0.227,0.176,0.053,0.022,0.169,0.254,0.107,0.083,0.147,0…	0.224,0.137,0.076,0.086,0.09,0.078,0.08,0.107,0.205,0.159,0.065,0.067,0.134,0.137,0.118,0.141,0.169,0.08,0.097,0.151,0.131,0.145,0.16,0.152,0.146,0.194,0.248,0.209,0.136,0.177,0.083,0.1,0.144,0.088,0.143,0.21,0.147,0.149,0.089,0.114,0.086,0.123,0.111,0.148,0.043,0.069,0.116,0.187,0.089,0.139,0.132,0.179	-0.026
24243	ENSG00000099785	MARCHF2	chr19	+	8418741	8418807	8413294	8413420	8421788	8422016	24243	9,15,5,14,7,9,8,14,10,8,18,15,15,22,8,8,10,9,21,26,13,17,12,14,7,9,5,7,12,22,16,20,7,14,14,8,11,4,7,7,11,11,13,5,11,10,5,10,11,12,5,14,8,12,11,8,25,16,12,13,21,15,21,18,22,27,2,7,26,14,11,10,3,4,13,12,15,17,19,11,13,13,6,15,16,12,10,3,10,15,10,7,6,2,10,11,12,19,3,12,12,13,9,7,4,5,13,13,5,5,8,15,10,11,6,18,9,22,10,10,15,14,23,14,8,4,15,4,9,13,20,19,14,17,9,10,12,18,8,11,10,14,7,8,12,9,11,5,12,6,9,…	0,1,0,2,1,0,1,0,0,0,2,1,1,0,0,0,0,0,3,2,0,0,1,1,0,1,3,0,1,1,0,0,1,1,1,3,0,2,3,0,0,0,0,0,0,0,0,0,1,2,0,0,1,0,2,0,0,1,0,0,1,0,1,4,2,1,0,0,0,1,1,0,1,0,0,0,1,0,0,0,1,0,0,0,0,1,1,0,0,0,0,0,0,0,4,0,2,4,1,0,0,0,0,0,0,0,1,0,0,0,1,0,2,1,0,0,0,0,0,0,1,1,0,0,0,0,1,0,0,0,4,0,0,0,0,1,1,0,0,0,0,0,0,0,2,0,0,0,2,0,1,0,0,0,1,1,0,0,0,2,1,1,0,1,1,0,0,0,0,0,0,0,0,2,1,0,0,0,1,1,0,1,1,1,0,0,0,0,5,0,2,2,0,0,0,0,0,0,0,0	17,11,21,21,8,5,64,56,26,19,17,12,13,11,17,37,22,21,15,16,26,27,16,22,13,17,16,8,11,16,20,19,60,54,9,16,20,14,13,17,21,27,15,14,22,8,29,42,20,22,12,23	1,2,0,0,0,0,5,5,1,1,3,0,1,2,0,2,3,4,1,0,1,2,1,0,1,7,6,2,3,1,1,2,4,3,3,0,0,0,2,3,3,0,0,1,1,3,1,2,0,3,1,0	100	50	2.55351e-15	7.15634e-13	1.0,0.882,1.0,0.778,0.778,1.0,0.8,1.0,1.0,1.0,0.818,0.882,0.882,1.0,1.0,1.0,1.0,1.0,0.778,0.867,1.0,1.0,0.857,0.875,1.0,0.818,0.455,1.0,0.857,0.917,1.0,1.0,0.778,0.875,0.875,0.571,1.0,0.5,0.538,1.0,1.0,1.0,1.0,1.0,1.0,1.0,1.0,1.0,0.846,0.75,1.0,1.0,0.8,1.0,0.733,1.0,1.0,0.889,1.0,1.0,0.913,1.0,0.913,0.692,0.846,0.931,1.0,1.0,1.0,0.875,0.846,1.0,0.6,1.0,1.0,1.0,0.882,1.0,1.0,1.0,0.867,1.0,1.0,1.0,…	0.895,0.733,1.0,1.0,1.0,1.0,0.865,0.848,0.929,0.905,0.739,1.0,0.867,0.733,1.0,0.902,0.786,0.724,0.882,1.0,0.929,0.871,0.889,1.0,0.867,0.548,0.571,0.667,0.647,0.889,0.909,0.826,0.882,0.9,0.6,1.0,1.0,1.0,0.765,0.739,0.778,1.0,1.0,0.875,0.917,0.571,0.935,0.913,1.0,0.786,0.857,1.0	0.062
24348	ENSG00000117676	RPS6KA1	chr1	+	26552817	26552896	26551643	26551723	26553390	26553497	24348	3,5,2,4,5,4,2,2,5,3,3,1,3,5,3,7,7,13,4,4,2,2,6,7,5,4,8,9,4,7,6,3,3,8,4,1,3,1,7,9,4,5,7,4,5,6,12,6,5,5,1,4,7,17,7,7,5,10,13,4,3,6,23,15,2,4,6,2,8,8,3,4,0,5,4,11,6,7,6,8,10,9,6,8,6,11,4,1,5,4,3,4,5,8,3,8,0,1,0,0,1,5,2,0,2,5,4,6,7,6,2,3,0,0,3,8,4,3,3,3,4,6,1,3,11,11,10,5,1,2,2,5,1,2,2,1,5,6,1,2,2,0,2,1,3,2,3,3,8,5,7,5,9,6,7,5,2,2,2,4,1,1,5,2,1,1,5,5,2,0,11,1,1,5,2,4,4,7,3,3,1,4,6,3,0,0,4,3,3,4,7,2,6…	127,156,109,94,147,110,139,117,116,121,123,118,105,95,193,172,102,178,183,173,97,119,159,158,118,107,173,159,184,185,158,131,129,139,136,141,164,125,206,199,172,201,134,134,182,160,171,149,156,136,150,130,144,137,165,176,109,102,142,143,93,110,41,54,110,119,118,95,212,256,94,92,67,70,68,91,104,79,147,161,185,177,170,160,138,98,131,156,145,147,137,119,129,155,96,101,50,34,32,26,165,153,65,59,120,1…	3,2,9,7,1,4,1,0,6,6,0,2,4,1,4,2,7,3,5,3,10,4,13,5,1,3,3,3,3,5,2,0,6,4,2,6,5,4,1,2,0,0,5,5,0,0,0,1,1,2,7,7	85,106,226,198,71,51,119,116,136,117,153,143,129,110,171,181,183,172,249,212,214,249,259,266,113,116,114,118,152,168,181,174,194,193,238,223,40,43,40,31,56,65,122,129,6,5,71,76,32,31,165,144	100	50	1.32376e-05	0.00105722	0.012,0.016,0.009,0.021,0.017,0.018,0.007,0.008,0.021,0.012,0.012,0.004,0.014,0.026,0.008,0.02,0.033,0.035,0.011,0.011,0.01,0.008,0.019,0.022,0.021,0.018,0.023,0.028,0.011,0.019,0.019,0.011,0.011,0.028,0.014,0.004,0.009,0.004,0.017,0.022,0.011,0.012,0.025,0.015,0.014,0.018,0.034,0.02,0.016,0.018,0.003,0.015,0.024,0.058,0.021,0.019,0.022,0.047,0.044,0.014,0.016,0.027,0.219,0.122,0.009,0.017,0.025,…	0.017,0.009,0.02,0.017,0.007,0.038,0.004,0.0,0.022,0.025,0.0,0.007,0.015,0.005,0.012,0.005,0.019,0.009,0.01,0.007,0.023,0.008,0.024,0.009,0.004,0.013,0.013,0.013,0.01,0.015,0.005,0.0,0.015,0.01,0.004,0.013,0.059,0.044,0.012,0.031,0.0,0.0,0.02,0.019,0.0,0.0,0.0,0.007,0.015,0.031,0.021,0.024	0.005
24430	ENSG00000130429	ARPC1B	chr7	+	99377333	99377439	99374706	99374781	99385701	99385778	24430	22,32,10,10,24,30,19,19,24,14,23,15,27,24,18,14,17,10,29,24,21,18,19,23,20,21,22,15,34,12,9,22,23,12,29,24,11,11,14,27,13,13,10,13,12,7,18,14,41,41,15,9,20,10,14,11,15,14,13,12,12,6,9,9,19,15,14,6,25,26,11,10,11,7,15,16,31,39,12,14,25,20,14,13,13,31,7,18,14,19,23,17,10,8,21,12,30,29,11,7,47,39,10,9,4,6,18,16,14,19,22,23,6,11,14,9,12,27,11,23,17,12,7,12,23,25,37,38,33,29,21,22,14,27,7,10,17,26,11,…	312,304,196,187,152,142,154,155,76,100,163,145,159,145,93,102,181,235,395,377,76,80,132,114,67,58,84,77,134,160,139,168,210,208,201,228,54,64,80,92,52,63,39,43,70,72,95,114,227,244,54,51,136,161,91,86,128,140,78,65,155,153,101,101,276,338,103,67,229,242,70,65,37,51,104,87,177,138,89,80,340,344,77,80,151,129,60,71,42,41,111,101,31,35,185,214,299,270,66,70,203,174,29,34,16,19,61,55,72,94,219,195,15…	20,23,27,32,11,8,45,47,22,22,16,10,21,9,32,31,37,29,15,21,45,44,16,12,24,16,43,27,35,22,21,26,36,20,15,18,12,9,22,13,24,20,18,14,8,7,12,12,10,14,20,14	282,272,243,234,93,101,690,669,222,263,274,276,187,178,438,446,346,322,238,201,375,392,213,193,292,260,411,447,342,306,389,372,515,493,153,144,69,70,194,202,610,607,236,211,108,94,234,203,122,138,196,193	100	50	0	0	0.034,0.05,0.025,0.026,0.073,0.096,0.058,0.058,0.136,0.065,0.066,0.049,0.078,0.076,0.088,0.064,0.045,0.021,0.035,0.031,0.121,0.101,0.067,0.092,0.13,0.153,0.116,0.089,0.113,0.036,0.031,0.061,0.052,0.028,0.067,0.05,0.092,0.079,0.08,0.128,0.111,0.094,0.114,0.131,0.079,0.046,0.087,0.058,0.083,0.078,0.122,0.081,0.068,0.03,0.071,0.06,0.055,0.048,0.077,0.085,0.037,0.019,0.043,0.043,0.033,0.022,0.064,0.0…	0.034,0.041,0.053,0.064,0.056,0.038,0.032,0.034,0.047,0.04,0.028,0.018,0.053,0.025,0.035,0.034,0.051,0.043,0.031,0.05,0.057,0.053,0.036,0.03,0.039,0.03,0.05,0.029,0.049,0.035,0.026,0.034,0.034,0.02,0.047,0.059,0.08,0.06,0.054,0.031,0.019,0.016,0.037,0.032,0.036,0.036,0.025,0.029,0.039,0.048,0.049,0.035	0.03
24537	ENSG00000172890	NADSYN1	chr11	+	71480218	71480274	71478394	71478469	71480754	71480879	24537	13,26,24,16,41,48,30,23,14,12,34,22,40,33,22,21,19,24,31,36,17,22,24,26,27,20,26,34,23,34,27,36,27,33,32,38,11,29,27,27,24,15,14,13,24,11,19,18,28,46,31,23,30,36,20,24,10,11,22,12,10,9,42,36,25,31,11,23,38,43,15,27,18,6,9,11,18,18,21,18,13,13,7,9,15,18,11,11,9,14,20,15,25,17,24,20,25,19,6,6,54,30,12,21,15,17,23,22,28,21,35,30,36,17,17,30,21,24,20,21,18,27,25,32,33,31,26,32,27,34,26,33,22,21,14,28…	22,15,9,8,17,24,8,12,5,4,12,17,20,11,6,11,21,11,30,29,13,12,13,14,9,9,25,17,9,6,18,18,7,12,17,25,9,3,13,6,4,3,3,7,6,7,9,17,34,28,16,12,10,10,10,8,8,5,3,7,7,6,9,16,19,19,10,11,25,18,7,4,6,3,2,4,9,11,5,7,14,10,10,14,14,7,5,5,3,7,9,18,5,8,17,12,22,22,8,8,14,18,4,3,2,5,5,9,5,4,17,18,11,21,15,15,9,20,10,9,7,12,9,9,10,4,17,12,11,13,19,16,10,13,10,13,8,10,11,5,19,22,11,15,10,21,7,7,10,14,12,10,6,12,16,9…	17,14,23,27,16,24,37,37,34,34,23,15,29,32,18,12,37,34,21,15,29,21,18,22,45,46,33,35,33,37,22,35,12,9,26,36,13,25,20,22,29,30,34,37,11,11,15,15,18,15,31,30	20,14,14,16,7,9,31,27,21,16,11,13,13,21,13,9,17,34,22,12,26,21,11,10,19,25,17,24,18,16,25,32,24,24,14,12,10,11,15,15,24,17,22,25,6,2,15,11,17,19,19,13	100	50	9.14465e-07	8.92124e-05	0.228,0.464,0.571,0.5,0.547,0.5,0.652,0.489,0.583,0.6,0.586,0.393,0.5,0.6,0.647,0.488,0.311,0.522,0.341,0.383,0.395,0.478,0.48,0.481,0.6,0.526,0.342,0.5,0.561,0.739,0.429,0.5,0.659,0.579,0.485,0.432,0.379,0.829,0.509,0.692,0.75,0.714,0.7,0.481,0.667,0.44,0.514,0.346,0.292,0.451,0.492,0.489,0.6,0.643,0.5,0.6,0.385,0.524,0.786,0.462,0.417,0.429,0.7,0.529,0.397,0.449,0.355,0.511,0.432,0.544,0.517,0.…	0.298,0.333,0.451,0.458,0.533,0.571,0.374,0.407,0.447,0.515,0.511,0.366,0.527,0.432,0.409,0.4,0.521,0.333,0.323,0.385,0.358,0.333,0.45,0.524,0.542,0.479,0.493,0.422,0.478,0.536,0.306,0.354,0.2,0.158,0.481,0.6,0.394,0.532,0.4,0.423,0.377,0.469,0.436,0.425,0.478,0.733,0.333,0.405,0.346,0.283,0.449,0.536	0.089
24754	ENSG00000130775	THEMIS2	chr1	+	27881970	27883043	27879643	27880054	27885294	27885451	24754	275,304,126,140,174,193,202,208,201,185,203,203,126,120,206,232,155,168,217,230,99,77,157,181,116,124,302,286,184,180,171,158,180,174,239,246,123,156,212,232,181,166,119,102,152,121,193,179,192,214,93,93,167,172,165,156,170,164,136,125,196,187,475,461,184,168,154,150,291,277,122,107,99,101,179,166,145,170,194,192,240,224,153,139,112,104,134,121,155,133,150,131,126,126,76,79,165,152,39,35,240,266,…	16,17,7,11,10,8,14,15,12,7,24,13,6,5,12,16,1,2,13,15,9,3,3,4,8,10,7,5,5,8,7,5,6,11,14,12,8,9,6,15,8,10,4,7,7,6,14,16,23,26,6,8,9,5,8,8,5,12,8,12,4,6,10,6,6,5,10,10,5,9,13,8,11,6,10,17,13,10,3,2,9,4,13,11,1,0,6,5,4,9,8,12,2,3,4,2,7,13,2,6,26,21,1,6,2,12,7,16,13,9,1,1,5,5,14,21,4,9,5,11,4,6,3,6,16,10,11,8,21,14,4,7,12,8,7,8,3,8,6,10,4,4,2,2,9,7,3,2,24,23,11,8,14,15,16,14,9,9,11,9,4,8,20,15,11,9,3,2…	190,154,274,268,142,145,275,217,298,279,210,212,167,185,294,288,322,301,389,360,380,362,326,320,258,228,223,203,199,214,250,254,366,338,361,379,103,100,111,101,266,244,198,218,42,30,181,151,111,94,203,228	24,22,25,12,12,12,15,15,7,7,18,13,9,7,21,12,27,19,23,23,21,33,5,17,18,11,25,24,6,10,13,16,8,6,13,15,5,8,11,13,20,22,16,8,2,1,6,2,10,9,22,24	100	50	0.000311557	0.0191328	0.896,0.899,0.9,0.864,0.897,0.923,0.878,0.874,0.893,0.93,0.809,0.886,0.913,0.923,0.896,0.879,0.987,0.977,0.893,0.885,0.846,0.928,0.963,0.958,0.879,0.861,0.956,0.966,0.948,0.918,0.924,0.94,0.938,0.888,0.895,0.911,0.885,0.897,0.946,0.885,0.919,0.892,0.937,0.879,0.916,0.91,0.873,0.848,0.807,0.805,0.886,0.853,0.903,0.945,0.912,0.907,0.944,0.872,0.895,0.839,0.961,0.94,0.96,0.975,0.939,0.944,0.885,0.88…	0.798,0.778,0.846,0.918,0.855,0.858,0.902,0.879,0.955,0.952,0.854,0.891,0.903,0.93,0.875,0.923,0.856,0.888,0.894,0.887,0.9,0.846,0.97,0.904,0.878,0.912,0.817,0.809,0.943,0.915,0.906,0.888,0.958,0.966,0.933,0.927,0.912,0.862,0.835,0.795,0.869,0.847,0.861,0.932,0.913,0.938,0.938,0.974,0.847,0.839,0.822,0.826	0.017
24818	ENSG00000196924	FLNA	chrX	-	154357250	154357274	154354824	154355072	154357433	154357623	24818	64,61,57,40,17,26,46,54,12,3,54,42,55,58,20,13,22,22,77,90,72,84,23,20,28,28,13,11,17,22,64,48,48,54,54,63,29,23,26,16,6,19,3,4,2,6,19,14,64,61,12,13,18,36,5,7,7,4,15,17,15,15,28,35,34,40,32,25,29,32,13,11,10,12,7,5,18,6,12,15,26,33,20,30,3,8,10,12,5,8,25,30,5,4,27,32,33,29,4,2,54,70,5,2,15,6,24,18,29,28,102,107,19,29,61,39,65,47,30,31,23,25,13,17,14,9,25,19,58,60,11,13,27,22,48,31,37,56,9,22,66,…	85,74,65,59,34,38,51,70,18,3,42,34,44,63,35,40,51,67,112,99,49,41,49,50,25,20,13,19,57,41,53,58,46,52,81,75,22,22,41,30,19,16,9,6,14,16,36,27,74,66,28,27,35,46,14,23,12,15,22,20,31,30,36,41,63,85,29,38,69,90,15,12,18,16,6,6,16,7,29,29,48,36,25,26,28,20,28,25,15,11,21,39,17,9,44,53,43,44,5,4,67,66,6,12,12,9,25,12,37,28,72,90,24,13,34,42,54,60,34,31,29,14,17,25,34,44,44,36,61,59,44,49,44,42,46,34,3…	13,12,43,41,33,33,149,125,61,54,25,26,81,121,54,57,71,63,19,25,49,26,14,14,115,95,46,44,64,91,35,42,29,39,34,27,16,19,39,25,35,33,66,56,5,2,24,20,12,17,32,27	11,15,48,44,22,18,125,113,41,41,41,41,66,65,38,58,47,63,28,18,28,39,25,19,56,49,39,26,77,80,48,52,62,56,22,27,25,20,29,30,30,40,52,52,0,2,24,30,9,11,41,35	74	50	5.28628e-06	0.000457768	0.337,0.358,0.372,0.314,0.253,0.316,0.379,0.343,0.311,0.403,0.465,0.455,0.458,0.383,0.279,0.18,0.226,0.182,0.317,0.381,0.498,0.581,0.241,0.213,0.431,0.486,0.403,0.281,0.168,0.266,0.449,0.359,0.414,0.412,0.311,0.362,0.471,0.414,0.3,0.265,0.176,0.445,0.184,0.311,0.088,0.202,0.263,0.259,0.369,0.384,0.225,0.245,0.258,0.346,0.194,0.171,0.283,0.153,0.315,0.365,0.246,0.253,0.344,0.366,0.267,0.241,0.427,…	0.444,0.351,0.377,0.386,0.503,0.553,0.446,0.428,0.501,0.471,0.292,0.3,0.453,0.557,0.49,0.399,0.505,0.403,0.314,0.484,0.542,0.311,0.275,0.332,0.581,0.567,0.444,0.533,0.36,0.435,0.33,0.353,0.24,0.32,0.511,0.403,0.302,0.391,0.476,0.36,0.441,0.358,0.462,0.421,1.0,0.403,0.403,0.311,0.474,0.511,0.345,0.343	-0.083
24831	ENSG00000168995	SIGLEC7	chr19	+	51144405	51144684	51142300	51142802	51144911	51144959	24831	48,65,10,19,22,23,30,28,33,28,26,30,20,11,23,17,16,11,21,27,19,15,3,11,18,23,10,9,11,12,31,34,20,15,25,40,27,30,13,18,12,5,7,15,16,8,13,13,33,26,17,13,15,10,4,8,12,22,12,12,9,8,5,2,43,34,20,19,27,31,19,19,8,10,23,18,13,12,19,9,10,6,10,15,12,12,19,18,7,16,23,27,8,15,11,9,29,26,0,1,42,33,10,13,14,17,14,18,46,43,39,29,41,31,25,25,20,17,21,19,20,9,18,13,10,10,33,28,54,39,24,24,18,11,23,21,31,30,14,7,…	3,2,0,1,1,1,5,1,2,1,3,1,4,1,1,1,0,0,1,0,0,3,0,0,2,0,0,1,0,1,3,1,5,2,7,3,1,2,1,0,0,0,1,0,3,0,0,0,1,4,2,0,3,2,1,0,0,0,0,0,0,0,0,0,2,1,1,2,3,2,5,2,1,1,1,2,0,0,0,1,0,1,1,0,3,2,1,0,1,0,3,0,0,2,0,0,0,0,1,0,1,1,0,1,1,0,0,0,2,2,2,1,3,3,1,1,1,2,3,2,0,0,1,6,1,0,2,3,9,5,0,0,1,1,2,0,1,3,0,0,3,7,6,4,0,2,1,3,1,5,1,0,2,8,2,2,1,1,3,0,1,2,0,1,0,0,3,3,1,1,2,0,1,0,2,6,0,0,4,2,0,1,1,2,1,1,1,0,1,2,3,2,7,6,1,2,0,1,1,1	25,24,35,39,23,20,80,81,32,27,36,36,20,18,39,41,41,39,82,66,56,46,26,18,43,43,75,60,39,45,48,49,53,49,39,40,55,50,41,39,41,51,41,50,15,16,27,35,31,26,31,20	1,1,4,3,0,2,7,8,2,1,2,3,3,0,5,11,5,4,3,0,2,5,2,1,1,4,1,1,2,4,6,2,4,0,0,1,3,1,4,4,6,4,3,6,1,1,3,1,2,1,2,1	100	50	5.19105e-07	5.28151e-05	0.889,0.942,1.0,0.905,0.917,0.92,0.75,0.933,0.892,0.933,0.812,0.938,0.714,0.846,0.92,0.895,1.0,1.0,0.913,1.0,1.0,0.714,1.0,1.0,0.818,1.0,1.0,0.818,1.0,0.857,0.838,0.944,0.667,0.789,0.641,0.87,0.931,0.882,0.867,1.0,1.0,1.0,0.778,1.0,0.727,1.0,1.0,1.0,0.943,0.765,0.81,1.0,0.714,0.714,0.667,1.0,1.0,1.0,1.0,1.0,1.0,1.0,1.0,1.0,0.915,0.944,0.909,0.826,0.818,0.886,0.655,0.826,0.8,0.833,0.92,0.818,1.0,1…	0.926,0.923,0.814,0.867,1.0,0.833,0.851,0.835,0.889,0.931,0.9,0.857,0.769,1.0,0.796,0.651,0.804,0.83,0.932,1.0,0.933,0.821,0.867,0.9,0.956,0.843,0.974,0.968,0.907,0.849,0.8,0.925,0.869,1.0,1.0,0.952,0.902,0.962,0.837,0.83,0.774,0.864,0.872,0.806,0.882,0.889,0.818,0.946,0.886,0.929,0.886,0.909	0.006
24900	ENSG00000138326	RPS24	chr10	+	78037438	78040225	78037193	78037304	78040614	78040716	24900	161,207,146,149,123,113,363,306,141,129,270,273,298,289,113,131,108,113,165,138,399,408,257,270,403,397,90,109,156,141,379,419,145,113,263,280,312,298,100,103,121,105,114,117,88,76,78,73,470,503,139,142,226,232,78,46,87,112,311,291,105,106,153,169,215,190,266,207,208,174,135,156,76,78,83,82,148,121,91,84,67,61,132,127,108,122,149,127,162,166,585,600,216,239,190,144,451,455,142,127,367,369,91,103,…	479,473,743,685,380,350,766,817,276,306,928,942,758,778,491,547,755,843,1060,1009,1214,1203,478,431,1175,1120,401,469,179,157,982,1019,777,825,693,721,680,702,540,542,425,436,602,591,430,417,593,617,1091,969,675,660,637,636,584,533,616,618,1301,1246,565,577,991,911,801,733,622,618,1731,1657,500,494,315,358,425,464,1024,987,570,562,671,645,960,930,373,360,428,454,465,441,740,767,413,378,915,883,11…	265,281,315,338,603,584,957,872,331,328,374,363,668,654,322,359,635,580,164,165,295,278,109,104,555,596,485,423,326,354,323,317,52,59,222,217,969,941,1225,1165,711,766,790,782,1651,1611,265,274,914,871,565,572	1.18312e+186	100	50	0	0	0.144,0.18,0.089,0.098,0.139,0.139,0.192,0.158,0.203,0.174,0.127,0.127,0.164,0.157,0.103,0.107,0.067,0.063,0.072,0.064,0.141,0.145,0.212,0.239,0.146,0.151,0.101,0.104,0.304,0.31,0.162,0.171,0.085,0.064,0.159,0.163,0.187,0.175,0.085,0.087,0.125,0.107,0.086,0.09,0.093,0.084,0.062,0.056,0.177,0.206,0.093,0.097,0.151,0.154,0.063,0.041,0.066,0.083,0.107,0.105,0.085,0.084,0.072,0.085,0.118,0.115,0.176,…	0.101,0.108,0.202,0.196,0.24,0.229,0.165,0.154,0.118,0.123,0.165,0.169,0.237,0.238,0.104,0.11,0.227,0.228,0.13,0.128,0.132,0.132,0.105,0.097,0.174,0.195,0.156,0.131,0.202,0.215,0.112,0.114,0.016,0.019,0.256,0.243,0.25,0.253,0.267,0.259,0.299,0.317,0.276,0.279,0.277,0.272,0.121,0.135,0.197,0.191,0.183,0.179	-0.045
25021	ENSG00000086730	LAT2	chr7	+	74214821	74214917	74209953	74210088	74215946	74216069	25021	120,114,67,74,117,110,68,56,77,52,52,61,67,74,55,55,83,91,92,62,38,42,75,65,40,35,92,76,43,41,70,79,87,62,76,82,42,34,91,95,65,76,46,44,51,31,77,88,69,72,79,62,54,57,87,85,47,38,32,35,67,44,27,23,89,92,38,48,121,108,41,39,36,28,63,73,55,38,60,49,67,74,62,54,47,57,27,45,31,21,33,25,44,44,32,36,29,21,15,14,72,71,30,29,16,19,51,40,59,60,83,89,12,27,72,51,43,40,43,57,59,60,70,58,68,71,103,84,51,45,41…	96,80,38,43,81,78,42,23,48,37,44,38,32,27,34,25,74,90,103,85,15,17,59,43,10,11,57,42,22,16,24,25,52,71,72,69,8,13,51,56,29,24,13,16,38,23,41,33,58,47,37,35,61,52,43,40,20,30,10,15,43,29,18,17,85,85,32,28,73,77,25,20,9,6,34,33,34,51,21,34,69,57,20,17,24,36,12,23,33,39,26,18,21,16,46,40,28,41,10,8,11,21,14,14,2,11,16,17,49,37,45,50,14,12,18,19,21,21,12,14,23,32,20,24,88,61,48,55,36,23,25,30,15,22,8…	40,53,52,63,29,27,55,54,58,73,44,60,46,44,85,89,70,66,56,43,48,34,74,55,33,46,55,46,60,60,54,58,131,122,92,64,16,7,26,40,44,33,48,61,6,10,39,30,3,6,60,53	58,43,64,41,11,16,33,32,43,40,61,64,43,38,74,84,79,94,84,74,82,95,97,89,45,61,76,71,92,90,96,98,96,105,69,78,16,10,10,12,64,52,54,50,7,10,35,19,19,17,66,78	100	50	0	0	0.385,0.416,0.469,0.462,0.419,0.414,0.447,0.549,0.445,0.413,0.371,0.445,0.511,0.578,0.447,0.524,0.359,0.336,0.309,0.267,0.559,0.553,0.389,0.43,0.667,0.614,0.447,0.475,0.494,0.562,0.593,0.612,0.455,0.304,0.345,0.373,0.724,0.567,0.472,0.459,0.528,0.613,0.639,0.579,0.402,0.403,0.484,0.571,0.373,0.434,0.516,0.47,0.307,0.354,0.503,0.515,0.54,0.388,0.615,0.538,0.438,0.431,0.429,0.404,0.344,0.351,0.373,…	0.256,0.381,0.289,0.434,0.569,0.458,0.455,0.458,0.403,0.477,0.265,0.319,0.348,0.367,0.365,0.346,0.307,0.26,0.25,0.225,0.226,0.152,0.276,0.236,0.268,0.274,0.266,0.245,0.246,0.25,0.22,0.228,0.406,0.367,0.4,0.291,0.333,0.259,0.565,0.625,0.256,0.241,0.308,0.379,0.3,0.333,0.358,0.441,0.073,0.15,0.312,0.254	0.131
25127	ENSG00000114209	PDCD10	chr3	-	167725400	167725473	167720061	167720273	167734213	167734345	25127	28,35,20,22,17,9,43,34,29,44,33,21,28,23,25,18,20,21,23,17,20,46,22,10,53,47,18,27,18,17,29,30,25,30,28,19,35,39,29,27,24,22,28,25,24,24,33,32,24,17,10,12,16,12,27,23,22,14,36,21,20,20,13,19,15,15,25,20,29,30,25,14,8,9,24,17,20,24,22,29,18,25,17,18,16,15,33,33,22,18,23,19,13,14,7,3,8,4,24,19,24,24,1,9,22,33,27,33,14,18,33,19,4,1,19,21,22,18,19,28,22,24,33,37,15,10,24,28,8,10,7,9,3,1,19,13,21,23,1…	2,0,1,1,1,2,2,2,3,2,4,4,4,2,2,2,0,2,3,4,3,3,2,3,0,8,4,3,2,4,3,1,1,3,5,1,3,1,2,6,6,0,5,2,4,1,0,2,5,2,3,1,1,0,2,0,3,3,5,5,7,5,5,5,4,3,1,4,7,5,1,4,2,2,2,1,1,3,5,2,9,5,1,1,0,0,2,3,3,5,0,2,2,6,0,0,0,0,5,1,0,2,1,0,3,1,2,4,1,1,8,5,0,0,3,1,1,3,4,1,3,2,9,5,0,0,1,8,0,2,0,3,0,0,1,0,1,6,0,1,2,4,4,4,0,2,4,4,6,4,4,2,1,0,2,0,0,1,0,0,4,3,3,0,0,4,2,7,2,1,0,2,4,5,3,0,1,2,5,2,1,0,0,4,0,0,0,0,1,0,0,1,1,2,1,2,6,4,5,0	10,10,26,18,7,8,12,14,23,24,13,22,30,26,27,41,26,26,41,26,35,17,21,36,22,12,18,15,21,22,19,18,25,16,27,21,4,5,4,7,12,10,14,18,1,1,14,15,7,8,19,21	0,0,1,1,0,0,2,2,0,0,0,0,4,4,3,2,0,2,5,5,1,2,6,5,0,1,2,0,3,0,0,1,3,2,1,1,0,0,0,0,0,0,0,3,0,0,3,0,0,1,0,0	100	50	1.0201e-09	1.50467e-07	0.875,1.0,0.909,0.917,0.895,0.692,0.915,0.895,0.829,0.917,0.805,0.724,0.778,0.852,0.862,0.818,1.0,0.84,0.793,0.68,0.769,0.885,0.846,0.625,1.0,0.746,0.692,0.818,0.818,0.68,0.829,0.938,0.926,0.833,0.737,0.905,0.854,0.951,0.879,0.692,0.667,1.0,0.737,0.862,0.75,0.923,1.0,0.889,0.706,0.81,0.625,0.857,0.889,1.0,0.871,1.0,0.786,0.7,0.783,0.677,0.588,0.667,0.565,0.655,0.652,0.714,0.926,0.714,0.674,0.75,0…	1.0,1.0,0.929,0.9,1.0,1.0,0.75,0.778,1.0,1.0,1.0,1.0,0.789,0.765,0.818,0.911,1.0,0.867,0.804,0.722,0.946,0.81,0.636,0.783,1.0,0.857,0.818,1.0,0.778,1.0,1.0,0.9,0.806,0.8,0.931,0.913,1.0,1.0,1.0,1.0,1.0,1.0,1.0,0.75,1.0,1.0,0.7,1.0,1.0,0.8,1.0,1.0	-0.077
25399	ENSG00000180353	HCLS1	chr3	-	121637145	121637256	121636433	121636489	121642926	121642981	25399	1073,1129,904,846,1298,1299,1089,1150,1224,1185,1163,1205,1080,1026,1647,1646,1571,1878,2060,2033,1045,960,1338,1339,1088,1019,2726,2563,2047,1982,1390,1447,1040,999,1610,1560,1622,1592,2858,2692,2133,2111,2281,2315,1388,1450,2545,2463,1487,1386,1980,1848,1375,1437,2234,2321,2582,2497,2719,2708,1037,956,1877,1813,989,1034,1268,1191,2257,2324,985,921,797,724,1247,1287,1935,1956,1762,1708,2683,2607…	2,2,3,12,1,2,4,6,5,7,5,3,1,2,3,0,7,7,20,16,11,14,5,4,3,4,23,17,3,0,2,13,2,4,3,1,1,1,14,13,9,11,20,12,4,2,33,28,0,2,12,4,15,27,40,41,26,19,23,22,6,8,189,155,0,1,10,9,19,37,0,1,8,2,14,10,42,45,19,13,55,57,11,7,9,4,1,3,16,5,19,9,7,12,41,27,5,5,7,4,8,2,1,2,7,1,35,23,24,31,6,6,9,1,10,8,26,21,12,2,0,3,0,0,6,4,9,1,3,3,2,1,2,0,0,0,0,1,3,4,1,6,5,3,0,1,0,0,13,14,5,5,4,5,5,5,0,1,0,0,1,1,5,5,2,1,5,2,2,9,15,1…	2.30222e+201	8,7,4,6,2,2,4,6,8,12,3,4,2,11,0,1,3,2,1,3,2,4,6,3,1,2,10,9,4,4,7,6,83,66,10,3,3,4,13,8,6,1,9,14,1,2,11,12,7,2,10,7	100	50	1.57871e-06	0.000148833	0.996,0.996,0.993,0.972,0.998,0.997,0.993,0.99,0.992,0.988,0.991,0.995,0.998,0.996,0.996,1.0,0.991,0.993,0.981,0.985,0.979,0.972,0.993,0.994,0.995,0.992,0.983,0.987,0.997,1.0,0.997,0.982,0.996,0.992,0.996,0.999,0.999,0.999,0.99,0.99,0.992,0.99,0.983,0.99,0.994,0.997,0.975,0.978,1.0,0.997,0.988,0.996,0.979,0.964,0.965,0.966,0.98,0.985,0.983,0.984,0.989,0.984,0.832,0.854,1.0,0.998,0.984,0.985,0.983…	0.993,0.994,0.996,0.994,0.997,0.997,0.994,0.99,0.991,0.987,0.998,0.997,0.997,0.982,1.0,0.999,0.997,0.998,0.999,0.997,0.998,0.996,0.996,0.998,0.999,0.998,0.99,0.991,0.995,0.995,0.994,0.994,0.944,0.952,0.994,0.998,0.994,0.993,0.972,0.982,0.992,0.999,0.99,0.984,0.994,0.986,0.984,0.983,0.986,0.996,0.993,0.995	-0.004
25754	ENSG00000177674	AGTRAP	chr1	+	11744532	11744568	11736152	11736235	11745802	11745837	25754	8,6,0,6,8,10,4,4,10,7,4,3,2,5,3,2,6,6,12,6,9,0,4,2,5,7,32,32,5,3,4,4,5,3,4,3,7,12,14,6,8,10,6,8,2,3,5,9,3,4,2,0,11,11,22,17,11,14,9,10,16,31,36,27,6,7,4,2,6,9,0,1,3,2,12,7,26,21,26,14,15,19,1,4,2,6,0,1,10,5,3,8,0,2,18,10,2,3,13,20,17,7,0,1,1,3,19,22,18,20,9,6,3,4,2,5,4,4,6,6,5,11,1,1,12,4,15,5,6,8,3,9,3,1,0,2,0,1,10,11,10,9,5,8,0,3,6,7,6,3,7,11,6,12,2,1,6,3,1,0,3,3,2,6,0,0,3,9,2,2,14,8,6,9,1,2,3,…	260,254,145,138,230,220,110,78,166,161,87,101,126,131,147,131,245,219,295,304,66,67,197,199,112,108,245,191,173,187,103,102,150,121,188,173,87,78,185,178,132,144,118,112,130,124,223,159,175,162,127,149,177,172,251,212,175,159,63,68,133,132,108,96,232,239,60,93,261,333,129,113,73,88,170,136,164,146,216,215,332,318,161,183,223,216,101,92,130,115,159,158,93,72,269,266,189,187,99,113,199,229,106,117,…	18,6,4,7,2,13,3,3,7,9,9,5,6,7,1,0,12,7,25,28,15,15,6,1,5,5,15,13,8,4,5,9,30,33,1,11,5,7,16,14,6,15,6,6,3,4,4,9,2,0,3,7	3.13317e+155	86	50	8.08165e-05	0.00564946	0.018,0.014,0.0,0.025,0.02,0.026,0.021,0.029,0.034,0.025,0.026,0.017,0.009,0.022,0.012,0.009,0.014,0.016,0.023,0.011,0.073,0.0,0.012,0.006,0.025,0.036,0.071,0.089,0.017,0.009,0.022,0.022,0.019,0.014,0.012,0.01,0.045,0.082,0.042,0.019,0.034,0.039,0.029,0.04,0.009,0.014,0.013,0.032,0.01,0.014,0.009,0.0,0.035,0.036,0.048,0.045,0.035,0.049,0.077,0.079,0.065,0.12,0.162,0.141,0.015,0.017,0.037,0.012,0.…	0.032,0.011,0.01,0.02,0.004,0.034,0.005,0.006,0.022,0.032,0.017,0.01,0.022,0.029,0.002,0.0,0.022,0.014,0.041,0.047,0.036,0.035,0.015,0.002,0.018,0.02,0.02,0.019,0.018,0.009,0.009,0.015,0.043,0.052,0.002,0.024,0.021,0.028,0.044,0.036,0.009,0.025,0.022,0.023,0.015,0.017,0.013,0.028,0.007,0.0,0.007,0.017	0.006
26011	ENSG00000172965	MIR4435-2HG	chr2	-	111469602	111469987	111429442	111429620	111494884	111495025	26011	6,7,3,0,6,3,6,2,4,4,2,3,4,2,1,0,3,2,2,2,5,4,3,1,4,6,6,8,8,0,2,1,2,0,3,4,2,2,2,0,2,0,2,1,6,5,3,3,3,1,0,1,1,2,10,12,6,3,1,2,4,6,2,9,1,3,1,10,6,14,4,2,3,3,8,6,4,4,5,3,5,8,4,1,3,5,5,5,3,4,3,10,1,3,4,4,5,3,0,1,5,5,1,1,6,3,3,8,4,9,3,2,21,5,1,1,2,0,9,1,4,3,4,3,5,2,2,1,8,1,1,2,1,5,2,2,1,4,2,2,4,1,2,0,1,1,10,7,3,0,7,10,9,15,2,0,10,5,2,0,5,3,2,2,2,3,5,6,4,6,1,4,2,2,1,0,10,8,8,8,2,1,1,1,2,1,12,4,5,5,10,22,5…	80,71,33,35,143,142,63,66,120,123,56,59,87,83,101,83,68,68,84,102,96,83,69,65,104,124,151,137,117,132,46,31,34,29,45,47,49,51,64,74,92,83,67,59,115,134,61,50,97,108,42,37,85,81,193,178,99,78,51,59,79,65,93,95,85,85,27,40,141,134,77,70,43,43,66,64,116,123,56,54,115,109,80,75,192,177,43,61,110,102,143,126,96,128,88,90,245,260,79,90,170,151,50,58,39,43,135,127,67,60,51,46,131,146,14,24,71,80,168,120…	3,3,2,2,3,0,1,5,3,1,8,3,0,0,2,4,4,1,3,3,6,9,1,4,2,0,2,8,3,6,4,2,4,7,3,1,0,2,2,3,11,6,3,3,0,2,4,7,4,3,3,5	148,155,69,45,133,120,86,79,51,34,158,173,22,32,117,125,54,66,85,81,154,131,141,137,91,77,104,103,114,81,165,171,180,160,59,61,59,74,78,68,106,120,89,78,134,138,271,255,77,68,92,115	100	50	0.000351172	0.0211032	0.036,0.047,0.043,0.0,0.021,0.01,0.045,0.015,0.016,0.016,0.018,0.025,0.022,0.012,0.005,0.0,0.022,0.014,0.012,0.01,0.025,0.024,0.021,0.008,0.019,0.024,0.019,0.028,0.033,0.0,0.021,0.016,0.029,0.0,0.032,0.041,0.02,0.019,0.015,0.0,0.011,0.0,0.015,0.008,0.025,0.018,0.024,0.029,0.015,0.005,0.0,0.013,0.006,0.012,0.025,0.033,0.029,0.019,0.01,0.017,0.025,0.044,0.011,0.045,0.006,0.017,0.018,0.111,0.021,0.0…	0.01,0.01,0.014,0.022,0.011,0.0,0.006,0.031,0.029,0.014,0.025,0.009,0.0,0.0,0.008,0.016,0.036,0.008,0.017,0.018,0.019,0.033,0.004,0.014,0.011,0.0,0.01,0.037,0.013,0.036,0.012,0.006,0.011,0.021,0.025,0.008,0.0,0.013,0.013,0.022,0.049,0.024,0.017,0.019,0.0,0.007,0.007,0.014,0.025,0.022,0.016,0.021	0.006
26310	ENSG00000106682	EIF4H	chr7	+	74190246	74190306	74189821	74189918	74194740	74194805	26310	29,36,28,25,18,15,34,29,33,32,22,29,47,36,7,12,39,21,33,27,61,67,21,19,41,41,37,33,12,7,53,34,21,15,40,38,29,33,11,17,15,20,24,18,9,13,34,25,24,26,11,16,51,49,18,23,16,20,54,63,25,34,258,204,27,28,26,28,57,65,18,16,10,12,18,26,33,26,34,32,33,33,16,21,18,12,17,11,48,34,30,46,18,26,13,24,2,6,11,8,30,42,1,3,20,13,28,35,94,91,49,47,1,3,36,40,70,60,35,27,15,19,9,11,10,8,18,17,12,6,20,15,0,1,24,27,13,1…	149,141,72,109,90,80,126,101,108,104,97,86,110,84,90,71,91,100,113,133,127,106,115,118,127,82,85,106,43,35,156,120,128,97,132,143,114,104,94,75,64,67,51,80,72,56,77,98,133,141,76,63,118,116,72,82,45,57,82,107,76,68,50,54,120,111,82,74,154,168,57,52,58,38,54,40,35,69,101,64,82,67,90,98,46,33,88,73,105,83,66,71,65,86,36,23,26,18,13,15,94,123,44,33,73,79,83,76,75,55,156,145,18,18,103,107,93,101,102,…	9,12,29,29,14,5,14,31,42,44,10,8,45,35,21,15,26,19,10,13,12,9,9,8,31,22,19,19,40,27,22,25,45,31,23,10,12,4,12,7,19,19,44,50,0,0,4,6,7,8,10,17	44,53,106,117,49,48,148,135,107,113,72,66,139,130,163,120,160,144,128,143,110,88,91,100,102,92,83,91,136,146,129,115,93,100,108,94,27,29,30,25,42,61,102,110,4,5,33,23,32,27,102,101	100	50	9.5909e-10	1.42835e-07	0.089,0.113,0.163,0.103,0.091,0.086,0.119,0.126,0.133,0.133,0.102,0.144,0.176,0.176,0.037,0.078,0.176,0.095,0.127,0.092,0.194,0.24,0.084,0.075,0.139,0.2,0.179,0.135,0.122,0.091,0.145,0.124,0.076,0.072,0.132,0.117,0.113,0.137,0.055,0.102,0.105,0.13,0.19,0.101,0.059,0.104,0.181,0.113,0.083,0.084,0.067,0.113,0.178,0.174,0.111,0.123,0.151,0.149,0.248,0.227,0.141,0.2,0.721,0.654,0.101,0.112,0.137,0.15…	0.093,0.102,0.12,0.11,0.125,0.05,0.045,0.103,0.164,0.163,0.065,0.057,0.139,0.119,0.061,0.059,0.075,0.062,0.038,0.043,0.052,0.049,0.047,0.038,0.132,0.107,0.103,0.095,0.128,0.085,0.079,0.098,0.195,0.134,0.096,0.051,0.182,0.065,0.167,0.123,0.184,0.135,0.177,0.185,0.0,0.0,0.057,0.115,0.099,0.129,0.047,0.078	0.033
26437	ENSG00000078369	GNB1	chr1	-	1839189	1839238	1824987	1825499	1890819	1890836	26437	232,280,141,112,138,120,206,185,172,183,124,142,122,130,188,158,148,134,201,198,154,180,133,155,183,139,187,189,180,158,185,192,158,169,180,162,203,179,192,191,178,173,118,105,138,126,229,174,194,198,120,134,202,189,152,156,79,90,139,144,142,115,114,120,150,149,155,184,320,296,73,76,96,98,81,82,77,78,163,151,156,157,162,154,85,70,154,149,140,154,94,84,121,137,63,55,40,48,25,20,154,142,45,48,135,1…	9,16,2,2,7,2,10,5,11,11,9,8,5,5,16,12,6,12,3,7,2,6,18,13,7,12,5,11,20,14,10,9,5,5,12,7,6,10,7,10,5,4,1,4,14,7,6,6,5,8,11,2,23,19,8,5,0,2,2,8,2,6,5,3,8,11,8,9,7,3,1,2,5,1,4,2,3,1,4,11,2,4,16,7,4,9,10,9,14,16,3,1,11,8,3,3,3,2,0,2,9,8,1,2,1,5,2,2,10,8,6,5,0,0,4,1,3,3,0,9,2,1,8,5,13,14,10,3,4,5,4,6,4,4,7,4,7,11,7,1,3,4,8,9,19,12,7,11,3,5,3,4,10,9,8,7,7,2,5,9,9,6,3,6,1,7,3,10,3,3,12,11,7,3,3,9,12,6,4,…	108,87,205,232,59,65,135,145,213,201,127,127,167,160,204,212,219,202,209,199,230,227,198,211,123,129,149,144,208,198,183,164,181,211,155,162,45,33,43,43,80,69,134,139,6,2,58,77,43,34,191,153	0,4,6,12,1,1,1,6,3,7,7,4,4,4,11,8,8,9,6,4,13,8,4,8,4,1,4,5,11,7,8,11,10,11,9,5,1,1,2,3,4,0,7,6,0,0,3,3,1,1,12,4	99	50	0.000302857	0.0186357	0.929,0.898,0.973,0.966,0.909,0.968,0.912,0.949,0.888,0.894,0.874,0.9,0.925,0.929,0.856,0.869,0.926,0.849,0.971,0.935,0.975,0.938,0.789,0.858,0.93,0.854,0.95,0.897,0.82,0.851,0.903,0.915,0.941,0.945,0.883,0.921,0.945,0.9,0.933,0.906,0.947,0.956,0.983,0.93,0.833,0.901,0.951,0.936,0.951,0.926,0.846,0.971,0.816,0.834,0.906,0.94,1.0,0.958,0.972,0.901,0.973,0.906,0.92,0.953,0.904,0.872,0.907,0.912,0.9…	1.0,0.917,0.945,0.907,0.968,0.97,0.986,0.924,0.973,0.935,0.902,0.941,0.955,0.953,0.904,0.93,0.933,0.919,0.946,0.962,0.899,0.935,0.962,0.93,0.94,0.985,0.95,0.936,0.905,0.935,0.92,0.883,0.901,0.906,0.897,0.942,0.958,0.943,0.916,0.879,0.91,1.0,0.906,0.921,1.0,1.0,0.907,0.928,0.956,0.945,0.889,0.951	-0.022
26439	ENSG00000143384	MCL1	chr1	-	150578243	150578491	150574550	150577491	150578842	150578963	26439	1156,1213,764,766,1389,1387,1281,1304,2081,2011,937,939,906,879,1811,1859,1377,1514,1145,1030,1178,1089,1570,1612,1430,1417,2505,2456,2393,2188,1155,1104,1010,943,1185,1186,1454,1528,2155,2030,2071,2084,1549,1539,1416,1348,1689,1736,857,883,1650,1586,2004,1951,2068,2050,840,866,1430,1432,1335,1341,1511,1481,1023,889,1808,1848,2523,2426,783,766,676,675,949,960,721,693,2033,1818,945,910,957,891,812…	25,38,32,40,26,18,89,80,83,72,55,59,17,14,42,37,39,37,25,26,53,58,21,18,79,70,83,113,54,58,62,60,28,28,67,51,38,28,45,47,54,40,39,47,40,51,63,69,17,15,53,41,78,74,82,88,27,14,81,71,40,58,171,168,12,12,142,145,106,79,12,10,30,14,44,46,17,17,44,36,22,12,13,22,62,66,26,19,142,144,50,39,76,68,12,14,2,0,3,0,18,34,2,5,34,37,38,24,164,132,12,18,3,1,126,133,25,33,28,16,14,12,13,7,9,7,13,8,12,12,1,0,2,0,6…	420,415,1747,1702,281,243,148,158,1106,1026,919,966,935,868,1444,1348,928,1036,1344,1253,888,930,2187,2231,517,567,780,806,1738,1776,730,744,983,1054,1209,1182,101,86,102,124,339,308,713,681,26,36,73,95,108,94,1001,1020	5,2,62,47,7,9,6,0,43,64,11,13,34,33,10,12,12,16,9,5,6,4,56,49,6,5,12,14,31,28,18,22,19,19,16,19,3,4,8,12,12,8,60,44,2,2,3,2,3,3,17,19	100	50	6.66134e-16	1.93732e-13	0.959,0.941,0.923,0.905,0.964,0.975,0.878,0.891,0.926,0.933,0.895,0.888,0.964,0.969,0.956,0.962,0.946,0.953,0.958,0.952,0.917,0.904,0.974,0.978,0.901,0.91,0.938,0.916,0.957,0.95,0.903,0.902,0.947,0.944,0.898,0.921,0.95,0.965,0.96,0.956,0.95,0.963,0.952,0.942,0.947,0.93,0.931,0.926,0.962,0.967,0.94,0.951,0.928,0.929,0.927,0.921,0.94,0.969,0.898,0.91,0.943,0.92,0.815,0.815,0.977,0.974,0.864,0.864,0…	0.977,0.99,0.934,0.948,0.953,0.931,0.925,1.0,0.928,0.889,0.977,0.974,0.932,0.929,0.986,0.983,0.975,0.97,0.987,0.992,0.987,0.991,0.951,0.958,0.977,0.983,0.97,0.966,0.966,0.969,0.953,0.944,0.963,0.965,0.974,0.969,0.944,0.915,0.864,0.838,0.934,0.951,0.856,0.886,0.867,0.9,0.924,0.96,0.947,0.94,0.967,0.964	-0.005
26475	ENSG00000241553	ARPC4	chr3	+	9799878	9800067	9797658	9797777	9800184	9800296	26475	8,8,4,6,9,18,14,15,5,7,7,5,3,10,10,4,4,6,10,7,6,8,9,5,8,10,7,19,8,3,18,7,4,7,9,5,8,9,11,5,18,22,10,17,7,5,7,11,5,5,13,11,3,5,14,16,6,6,6,17,12,13,21,24,9,13,0,4,12,14,6,2,0,8,9,5,13,16,8,5,6,4,10,9,3,7,14,13,11,12,10,5,10,9,10,13,2,2,3,1,17,15,3,3,6,8,9,15,11,11,12,16,3,2,3,10,12,16,5,12,9,8,12,13,8,15,21,15,5,6,10,7,2,4,8,7,13,8,5,6,9,8,7,10,5,5,11,8,4,11,13,9,5,12,11,7,4,5,8,4,3,8,7,6,4,7,8,16,…	266,277,185,225,270,316,272,281,238,271,272,278,252,204,289,326,184,186,358,332,214,187,234,244,265,281,211,191,241,216,286,303,273,260,255,264,294,272,302,264,246,241,282,302,289,254,258,268,380,326,166,219,321,275,229,230,222,247,230,213,175,183,182,176,244,272,210,218,383,412,287,218,121,132,195,202,274,274,187,207,306,310,296,247,286,271,246,247,286,303,230,244,299,259,239,211,218,214,185,197…	9,13,8,12,13,14,6,4,4,3,12,13,6,4,10,4,16,7,15,6,4,6,9,6,10,19,5,6,12,6,7,14,11,4,11,8,3,11,3,8,9,2,8,6,0,0,12,13,3,6,7,9	3.33338e+155	100	50	3.36857e-11	5.96818e-09	0.015,0.014,0.011,0.013,0.016,0.028,0.025,0.026,0.01,0.013,0.013,0.009,0.006,0.024,0.017,0.006,0.011,0.016,0.014,0.01,0.014,0.021,0.019,0.01,0.015,0.017,0.016,0.047,0.016,0.007,0.031,0.011,0.007,0.013,0.017,0.009,0.013,0.016,0.018,0.009,0.035,0.044,0.017,0.027,0.012,0.01,0.013,0.02,0.007,0.008,0.038,0.024,0.005,0.009,0.03,0.034,0.013,0.012,0.013,0.038,0.033,0.034,0.055,0.064,0.018,0.023,0.0,0.009…	0.013,0.019,0.011,0.017,0.025,0.029,0.007,0.005,0.006,0.004,0.016,0.017,0.011,0.007,0.01,0.004,0.017,0.007,0.017,0.007,0.004,0.006,0.011,0.007,0.014,0.025,0.004,0.006,0.015,0.009,0.007,0.014,0.015,0.005,0.015,0.01,0.006,0.02,0.006,0.017,0.014,0.004,0.011,0.008,0.0,0.0,0.021,0.025,0.006,0.014,0.009,0.013	0.006
26501	ENSG00000157551	KCNJ15	chr21	+	38298143	38298282	38296925	38297023	38299243	38299319	26501	10,6,13,10,33,27,4,6,46,34,5,3,7,6,13,19,13,10,17,9,15,5,8,13,21,8,44,24,52,50,17,13,7,3,13,18,7,3,11,5,15,13,5,1,8,7,4,8,8,19,11,7,15,17,17,10,3,3,11,11,14,18,19,17,24,9,22,12,18,19,3,1,8,2,27,21,2,1,10,16,7,6,13,12,9,20,16,17,29,27,14,13,42,30,6,8,1,4,1,0,8,9,13,15,10,9,14,14,115,110,11,4,2,1,10,11,10,9,8,16,6,8,15,10,9,7,14,10,4,2,1,1,2,0,4,2,9,9,11,3,6,2,11,9,3,7,35,40,14,11,10,19,15,20,3,3,1…	125,132,77,87,300,330,44,49,268,289,97,87,62,66,143,103,134,147,153,135,44,37,142,114,126,109,155,160,190,180,58,71,98,115,122,123,60,68,164,131,167,131,50,54,168,163,136,156,136,136,146,130,137,133,139,132,52,53,38,51,111,92,39,29,164,142,88,113,194,195,54,45,53,47,107,104,46,45,115,113,152,138,199,204,112,107,116,104,183,164,44,63,108,105,95,72,27,11,6,19,107,84,101,88,109,92,150,165,248,226,84…	2,6,11,14,8,7,3,0,7,14,9,7,12,14,4,13,6,12,13,20,5,2,11,14,1,2,2,4,22,7,13,10,8,7,14,9,1,0,3,1,8,8,15,7,0,0,0,2,1,0,6,5	89,66,114,143,47,38,7,8,54,65,122,115,54,65,119,105,122,124,153,148,194,168,150,154,38,44,45,68,167,146,137,125,103,109,192,159,8,20,9,13,53,55,62,82,6,7,18,18,17,9,93,92	100	50	5.33928e-07	5.41446e-05	0.038,0.022,0.078,0.054,0.052,0.039,0.043,0.058,0.079,0.056,0.025,0.017,0.053,0.043,0.043,0.084,0.046,0.033,0.053,0.032,0.146,0.063,0.027,0.054,0.077,0.035,0.124,0.07,0.12,0.122,0.128,0.084,0.034,0.013,0.051,0.068,0.055,0.022,0.032,0.019,0.043,0.047,0.048,0.009,0.023,0.021,0.014,0.025,0.029,0.065,0.036,0.026,0.052,0.06,0.058,0.036,0.028,0.028,0.126,0.097,0.059,0.089,0.196,0.227,0.068,0.031,0.111,…	0.011,0.043,0.046,0.047,0.078,0.084,0.176,0.0,0.061,0.097,0.036,0.03,0.1,0.097,0.017,0.058,0.024,0.046,0.041,0.063,0.013,0.006,0.035,0.043,0.013,0.022,0.022,0.029,0.062,0.023,0.045,0.038,0.037,0.031,0.035,0.028,0.059,0.0,0.143,0.037,0.07,0.068,0.108,0.041,0.0,0.0,0.0,0.053,0.029,0.0,0.031,0.026	0.009
26562	ENSG00000003756	RBM5	chr3	+	50110378	50110463	50109602	50109688	50110678	50110770	26562	142,164,87,103,209,239,183,149,172,163,122,141,189,185,177,191,122,136,151,152,150,160,198,184,188,177,214,172,193,192,168,160,136,152,157,136,184,197,194,214,207,209,109,143,125,133,160,179,218,177,125,182,164,153,177,183,110,87,169,149,98,99,35,25,130,161,167,163,209,212,130,120,76,94,73,77,73,77,157,169,106,98,140,141,63,64,116,122,137,116,82,79,166,134,47,36,51,38,9,15,115,135,103,83,168,195,…	13,14,18,6,14,19,13,16,8,3,20,11,17,11,17,14,6,11,9,16,19,22,4,7,18,25,19,14,7,12,19,22,11,7,11,17,18,20,14,17,19,20,8,7,8,14,25,18,18,14,13,14,13,15,20,17,8,13,21,16,10,3,56,55,10,14,15,17,23,33,11,14,10,8,15,13,2,5,11,12,11,14,11,6,6,5,4,6,7,10,3,5,5,14,3,7,2,5,1,0,18,15,1,7,15,19,21,18,15,31,15,14,5,3,14,25,7,5,17,18,22,14,16,5,11,9,18,13,19,10,4,3,0,1,13,7,15,18,6,12,9,9,24,16,9,4,8,7,5,13,20…	95,91,237,199,79,49,126,120,168,160,109,139,204,205,161,140,183,213,160,133,183,188,218,218,148,177,153,126,220,209,153,114,120,134,252,249,70,61,21,38,71,66,159,173,6,3,29,30,52,63,218,195	4,9,13,15,3,3,7,4,15,30,8,10,15,17,2,3,9,11,10,8,1,6,7,18,20,12,11,13,11,12,5,5,11,15,21,16,2,2,0,0,0,5,23,15,1,4,0,3,6,9,26,11	100	50	7.10492e-05	0.00502364	0.845,0.854,0.707,0.896,0.882,0.863,0.876,0.823,0.915,0.964,0.753,0.865,0.848,0.894,0.839,0.872,0.91,0.861,0.893,0.826,0.798,0.784,0.961,0.929,0.839,0.78,0.849,0.86,0.932,0.889,0.816,0.784,0.861,0.916,0.877,0.8,0.836,0.831,0.874,0.863,0.845,0.839,0.872,0.911,0.887,0.826,0.762,0.833,0.858,0.863,0.828,0.867,0.863,0.836,0.816,0.843,0.873,0.77,0.801,0.823,0.831,0.943,0.238,0.185,0.867,0.852,0.848,0.8…	0.922,0.835,0.901,0.869,0.929,0.891,0.9,0.938,0.848,0.727,0.872,0.874,0.872,0.858,0.976,0.959,0.91,0.906,0.889,0.893,0.989,0.94,0.94,0.858,0.787,0.881,0.874,0.829,0.909,0.897,0.939,0.919,0.845,0.817,0.857,0.886,0.946,0.938,1.0,1.0,1.0,0.868,0.776,0.852,0.75,0.273,1.0,0.833,0.812,0.778,0.807,0.899	-0.022
26578	ENSG00000166091	CMTM5	chr14	+	23378348	23378501	23376807	23377377	23379030	23379123	26578	59,66,49,45,15,7,36,44,26,19,39,33,48,61,18,29,48,56,108,81,51,32,95,79,29,20,78,66,120,105,75,53,29,43,33,31,12,24,35,34,66,53,20,16,20,20,20,27,30,36,37,30,60,50,44,39,98,95,43,60,111,88,164,175,207,203,33,34,181,139,49,68,46,38,34,22,73,56,62,54,53,51,29,40,79,96,48,54,55,43,7,4,36,37,74,56,93,119,36,43,93,83,12,13,13,13,27,43,63,54,47,52,23,21,15,9,25,25,76,48,109,107,88,99,19,23,41,46,125,11…	10,6,9,11,0,3,8,6,1,2,7,16,8,9,6,10,7,6,26,21,4,14,9,13,3,6,6,3,27,21,5,13,7,5,6,1,0,3,4,4,6,5,1,1,3,2,5,6,11,5,4,7,12,14,2,6,11,7,12,9,22,11,34,26,24,21,1,6,15,13,7,6,2,8,9,5,3,5,6,4,5,11,7,6,19,25,5,5,4,7,1,1,2,4,13,8,20,20,7,3,18,21,3,1,1,1,3,3,7,5,10,15,6,7,4,1,4,6,8,8,13,16,15,11,7,5,9,3,23,21,20,28,10,9,10,8,2,4,5,10,6,13,1,1,11,9,2,1,1,0,10,7,3,2,1,7,28,30,2,1,21,11,1,2,0,0,13,18,2,3,5,2,1…	67,47,51,43,75,107,175,166,17,20,18,35,29,27,155,126,49,51,21,23,7,12,6,19,34,44,27,22,35,39,33,21,12,12,26,29,40,61,52,58,32,32,11,15,8,10,261,250,54,55,21,27	17,11,11,6,20,16,38,42,3,3,9,9,17,11,21,22,11,7,4,4,2,3,0,2,8,7,10,10,5,5,9,4,2,1,8,8,12,16,12,10,9,2,5,5,1,0,21,32,22,18,6,10	100	50	3.23741e-06	0.000287616	0.747,0.846,0.731,0.672,1.0,0.538,0.692,0.786,0.929,0.826,0.736,0.508,0.75,0.772,0.6,0.592,0.774,0.824,0.675,0.659,0.864,0.533,0.841,0.752,0.829,0.625,0.867,0.917,0.69,0.714,0.882,0.671,0.674,0.811,0.733,0.939,1.0,0.8,0.814,0.81,0.846,0.841,0.909,0.889,0.769,0.833,0.667,0.692,0.577,0.783,0.822,0.682,0.714,0.641,0.917,0.765,0.817,0.872,0.642,0.769,0.716,0.8,0.707,0.771,0.812,0.829,0.943,0.739,0.85…	0.663,0.681,0.699,0.782,0.652,0.77,0.697,0.664,0.739,0.769,0.5,0.66,0.46,0.551,0.787,0.741,0.69,0.785,0.724,0.742,0.636,0.667,1.0,0.826,0.68,0.759,0.574,0.524,0.778,0.796,0.647,0.724,0.75,0.857,0.619,0.644,0.625,0.656,0.684,0.744,0.64,0.889,0.524,0.6,0.8,1.0,0.861,0.796,0.551,0.604,0.636,0.574	0.069
26642	ENSG00000177156	TALDO1	chr11	+	752263	752473	747414	747578	755878	756002	26642	10,14,14,11,14,21,10,10,5,4,10,13,3,10,6,8,15,14,18,23,1,4,10,18,6,11,22,20,15,8,4,12,13,13,7,17,9,4,16,7,11,15,7,5,10,10,15,12,11,14,15,14,17,16,18,12,8,9,6,5,6,5,9,8,27,13,9,4,22,23,10,7,1,5,6,7,5,13,18,13,28,22,8,8,10,12,14,7,8,4,9,9,8,9,13,10,18,11,3,1,14,14,2,2,1,1,10,3,11,8,11,15,10,12,10,8,5,5,7,3,11,5,20,11,22,19,25,22,12,12,14,10,8,5,4,4,7,8,7,15,7,10,7,3,7,13,5,6,14,7,9,7,7,5,6,6,21,18,…	266,315,202,234,299,278,153,136,134,103,167,181,123,113,215,191,258,309,541,576,85,64,191,209,71,95,169,164,152,158,143,145,339,339,280,292,94,99,290,283,169,187,90,91,155,154,290,301,336,300,175,129,239,228,221,192,246,218,110,105,183,159,142,107,313,308,136,167,401,407,118,108,104,102,93,93,188,187,177,170,622,568,134,110,219,230,78,86,134,139,187,161,64,84,304,285,255,229,96,98,212,220,48,50,3…	15,25,26,20,7,9,26,14,19,13,14,8,15,11,11,20,27,25,18,22,23,33,20,25,13,23,7,16,19,24,21,15,13,15,35,39,8,6,3,2,21,8,16,12,3,5,13,16,16,6,15,23	502,442,402,411,179,179,363,370,469,437,551,515,202,194,513,464,570,535,358,375,638,761,655,593,501,465,813,709,511,540,621,625,732,710,208,227,145,150,208,206,453,451,441,427,84,89,332,295,246,294,391,448	100	50	8.45577e-09	1.08614e-06	0.018,0.022,0.033,0.023,0.023,0.036,0.032,0.035,0.018,0.019,0.029,0.035,0.012,0.042,0.014,0.021,0.028,0.022,0.016,0.02,0.006,0.03,0.026,0.041,0.041,0.055,0.061,0.057,0.047,0.025,0.014,0.04,0.019,0.019,0.012,0.028,0.046,0.02,0.027,0.012,0.032,0.039,0.037,0.027,0.031,0.031,0.025,0.02,0.016,0.023,0.041,0.051,0.034,0.034,0.039,0.03,0.016,0.02,0.027,0.023,0.016,0.015,0.031,0.036,0.041,0.021,0.032,0.01…	0.015,0.028,0.031,0.024,0.019,0.025,0.035,0.019,0.02,0.015,0.013,0.008,0.036,0.028,0.011,0.021,0.023,0.023,0.025,0.028,0.018,0.021,0.015,0.021,0.013,0.024,0.004,0.011,0.018,0.022,0.017,0.012,0.009,0.01,0.078,0.079,0.027,0.02,0.007,0.005,0.023,0.009,0.018,0.014,0.018,0.027,0.019,0.026,0.031,0.01,0.019,0.025	0.006
26943	ENSG00000072694	FCGR2B	chr1	+	161675256	161675313	161673959	161674073	161677327	161677365	26943	9,12,3,6,16,29,22,18,80,68,18,21,24,13,3,10,39,27,15,12,19,20,11,25,14,23,15,7,11,6,35,33,8,6,20,18,15,23,25,31,8,10,3,3,5,15,14,12,16,13,13,12,17,19,24,25,5,9,10,9,24,23,3,1,13,11,20,18,33,20,20,21,5,2,8,11,9,15,12,8,17,6,14,13,18,19,29,27,33,15,21,14,17,17,15,18,9,11,6,3,9,6,13,9,16,14,3,4,7,9,20,15,11,4,13,15,9,9,23,18,7,9,37,37,5,11,11,11,8,8,71,46,9,9,22,21,16,13,16,11,20,20,23,24,8,9,14,13,…	14,24,4,7,36,26,28,25,48,42,25,13,15,16,44,45,17,19,11,14,13,23,27,26,22,20,33,33,16,17,27,30,11,12,38,35,25,16,37,47,28,19,23,14,37,35,37,28,18,21,14,17,56,52,50,52,11,12,11,8,26,31,4,6,9,11,37,32,48,70,51,38,16,17,24,26,13,19,16,28,23,24,36,38,18,21,25,31,64,74,54,62,34,28,36,32,37,41,5,6,42,39,20,20,26,20,11,23,26,19,15,14,6,10,20,29,7,10,20,13,8,8,27,42,37,26,25,15,22,20,19,21,26,23,18,15,20,…	12,13,11,13,17,12,22,21,16,21,20,22,32,24,17,16,36,37,45,40,17,28,9,13,7,8,53,49,36,29,10,13,20,8,22,18,17,16,15,16,24,22,39,39,16,18,11,4,16,13,15,8	34,20,21,23,6,11,13,8,20,17,32,34,15,12,27,33,27,38,30,37,26,25,26,41,4,8,50,78,21,23,25,24,16,12,22,25,7,11,16,13,22,32,28,24,5,7,3,2,2,4,14,15	100	50	1.29749e-07	1.45451e-05	0.243,0.2,0.273,0.3,0.182,0.358,0.282,0.265,0.455,0.447,0.265,0.447,0.444,0.289,0.033,0.1,0.534,0.415,0.405,0.3,0.422,0.303,0.169,0.325,0.241,0.365,0.185,0.096,0.256,0.15,0.393,0.355,0.267,0.2,0.208,0.205,0.231,0.418,0.253,0.248,0.125,0.208,0.061,0.097,0.063,0.176,0.159,0.176,0.308,0.236,0.317,0.261,0.132,0.154,0.194,0.194,0.185,0.273,0.312,0.36,0.316,0.271,0.273,0.077,0.419,0.333,0.213,0.22,0.25…	0.15,0.245,0.208,0.22,0.586,0.353,0.458,0.568,0.286,0.382,0.238,0.244,0.516,0.5,0.239,0.195,0.4,0.327,0.429,0.351,0.246,0.359,0.148,0.137,0.467,0.333,0.346,0.239,0.462,0.387,0.167,0.213,0.385,0.25,0.333,0.265,0.548,0.421,0.319,0.381,0.353,0.256,0.411,0.448,0.615,0.562,0.647,0.5,0.8,0.619,0.349,0.211	-0.103
[truncated: 663 more rows]
